# Supplementary material for: Serum Extracellular Vesicle-Derived microRNAs as Potential Biomarkers for Pleural Mesothelioma in a European Prospective Study
Source: MDPI journal article supplement (doi:10.3390/cancers15010125), 2022-12-25
Supplement: s1 [file s1]

## Supplementary Methods.

### *Asbestos exposure assessment*

Occupational information was available from the baseline EPIC questionnaire. It included the occupation at enrolment and data on ever working up to the time of enrolment in 52 at-risk occupations. No information was available on duration of employment and time of first employment. A semi-quantitative job-exposure matrix (JEM) was developed by expert epidemiologists as previously described [1], assigning to each occupation an “exposure probability” and an “exposure intensity” based on occupational history data (occupational categories of the questionnaire 1-52). The “exposure probability” and “exposure intensity” were coded as: 0 = no probability/intensity; 1 = low probability/intensity; 2 = intermediate probability/intensity; 3 = high probability/intensity.

The two values (probability and intensity) are then used to build up, for each occupation, an “Exposure Index” given by “Probability of exposure” \* “intensity of exposure”. The Exposure Index (EI) may thus assume the following values: 0, 1, 2, 3, 4, 6, 9. Each occupation has its own EI, which may be assigned to each individual as his/her own Exposure Index. If a participant has several occupations, a “cumulative exposure index” is computed. The cumulative exposure index is the sum of all the EIs (one for each occupation) of that individual. For participants with just one occupation the EI and the Cumulative Exposure Index coincide.

Derivative Exposure Indexes: the Exposure Index assigned to each individual according to his/her occupation (or the Cumulative Exposure Index in the case of multiple occupations) is used to build up derivative exposure indexes: a “Binary Exposure Index”, coded as: 0 = no exposure (if the Exposure Index, or cum. index in the case of multiple jobs, is < 3); 1 = exposed (if the Exposure Index, or cumulative index in the case of multiple jobs, is  $\geq 3$ ). The table below shows the 52 occupational categories and exposure matrix.

|    | EPIC list of occupations                      | Probability of exposure | Intensity of Exposure | Exposure index | Binary exposure index |
|----|-----------------------------------------------|-------------------------|-----------------------|----------------|-----------------------|
| 1  | 1.1 Livestock breeding                        | 0                       | 0                     | 0              | 0                     |
| 2  | 1.2 Agriculture                               | 0                       | 0                     | 0              | 0                     |
| 3  | 2 mines or quarries                           | 0                       | 0                     | 0              | 0                     |
| 4  | 3 Foundry                                     | 1                       | 2                     | 2              | 0                     |
| 5  | - Steel                                       | 1                       | 2                     | 2              | 0                     |
| 6  | - Special alloys                              | 1                       | 2                     | 2              | 0                     |
| 7  | 4 Galvanic                                    | 0                       | 0                     | 0              | 0                     |
| 8  | 5 Chemical Industry                           | 1                       | 2                     | 2              | 0                     |
| 9  | - Refinery                                    | 1                       | 2                     | 2              | 0                     |
| 10 | - Dyes Production                             | 1                       | 2                     | 2              | 0                     |
| 11 | - Chemical Laboratory                         | 0                       | 0                     | 0              | 0                     |
| 12 | 6 Rubber Industry                             | 1                       | 1                     | 1              | 0                     |
| 13 | 7 Textile Industry                            | 1                       | 1                     | 1              | 0                     |
| 14 | - Of tissues Dyeing                           | 2                       | 2                     | 4              | 1                     |
| 15 | - Weaving                                     | 1                       | 2                     | 2              | 0                     |
| 16 | 8 Processing and tanning                      | 0                       | 0                     | 0              | 0                     |
| 17 | 9 Production of shoes and leather             | 0                       | 0                     | 0              | 0                     |
| 18 | 10 Woodworking                                | 0                       | 0                     | 0              | 0                     |
| 19 | - Production of furniture                     | 0                       | 0                     | 0              | 0                     |
| 20 | 11 Metalworking                               | 1                       | 1                     | 1              | 0                     |
| 21 | - Turning, drilling, milling etc..            | 0                       | 0                     | 0              | 0                     |
| 22 | - Welding                                     | 2                       | 2                     | 4              | 1                     |
| 23 | - Painting                                    | 0                       | 0                     | 0              | 0                     |
| 24 | 12 Boatyard                                   | 2                       | 3                     | 6              | 1                     |
| 25 | 13 Electrical and Electronics Industry        | 1                       | 1                     | 1              | 0                     |
| 26 | 14 Glass Industry                             | 1                       | 2                     | 2              | 0                     |
| 27 | 15 Typography                                 | 0                       | 0                     | 0              | 0                     |
| 28 | 16 Construction                               | 1                       | 2                     | 2              | 0                     |
| 29 | - Roof Waterproofing                          | 2                       | 2                     | 4              | 1                     |
| 30 | - Asphalt                                     | 0                       | 0                     | 0              | 0                     |
| 31 | - Demolition                                  | 2                       | 2                     | 4              | 1                     |
| 32 | 17 Transport                                  | 1                       | 1                     | 1              | 0                     |
| 33 | - Truck driver                                | 1                       | 2                     | 2              | 0                     |
| 34 | - Driver                                      | 0                       | 0                     | 0              | 0                     |
| 35 | - Taxi driver                                 | 0                       | 0                     | 0              | 0                     |
| 36 | 18 Nuclear Industry                           | 1                       | 2                     | 2              | 0                     |
| 37 | 19 Production of paper or cellulose           | 1                       | 2                     | 2              | 0                     |
| 38 | 20 Production of asbestos and asbestos-cement | 3                       | 3                     | 9              | 1                     |
| 39 | 21 Worker with asbestos insulation            | 3                       | 3                     | 9              | 1                     |
| 40 | 22 Production of cement                       | 0                       | 0                     | 0              | 0                     |
| 41 | 23 Production of ceramics                     | 0                       | 0                     | 0              | 0                     |
| 42 | 24 Butcher                                    | 0                       | 0                     | 0              | 0                     |
| 43 | 25 Painter, painter                           | 1                       | 1                     | 1              | 0                     |
| 44 | 26 Welder                                     | 2                       | 2                     | 4              | 1                     |
| 45 | 27 Hairdresser                                | 0                       | 0                     | 0              | 0                     |
| 46 | 28 Gas Station                                | 0                       | 0                     | 0              | 0                     |
| 47 | 29 Auto Mechanic                              | 1                       | 1                     | 1              | 0                     |
| 48 | 30 Bartender                                  | 0                       | 0                     | 0              | 0                     |
| 49 | 31 Warden restaurant                          | 0                       | 0                     | 0              | 0                     |
| 50 | 32 Medical and Health Services                | 0                       | 0                     | 0              | 0                     |
| 51 | 33 Electrician                                | 2                       | 2                     | 4              | 1                     |
| 52 | 34 Other                                      | 0                       | 0                     | 0              | 0                     |

### *RT-qPCR analysis*

For technical confirmation of the miRNA-seq results, the RT-qPCR was performed according to TaqMan® MicroRNA Assays with custom RT pools and custom preamplification pools protocol (Thermo Fisher Scientific, USA). Briefly, four µl of total RNA was used for RT using TaqMan miRNA Reverse Transcription Kit (Life Technologies, USA) with custom RT primer pool. Two samples (a case and its matched control) were excluded due to insufficient RNA amount, therefore RT-qPCR analysis was performed on 38 samples. The RT product (3.5 µl) was preamplified with TaqMan PreAmp Master Mix and a custom PreAmp primer pool. PreAmp product was diluted with 0.1 xTE (10mM TrisHCl, 1mM disodium EDTA pH8.0) to final volume of 200µl, then 0.5 µl of pre-amplified cDNA was used for PCR reaction with TaqMan Fast Advanced master mix. Real-time PCR was performed on CFX96 Real-Time PCR machine (BioRad, USA) according to the manufacturer's protocol. Relative gene expression was calculated using the  $2^{-\Delta\Delta C_t}$  method and normalised to the endogenous control miR-92b-3p [2]. The differences in the expression of the analysed miRNAs between pre-clinical cases and cancer-free controls were assessed by the Wilcoxon test.

### **Supplementary Figures**

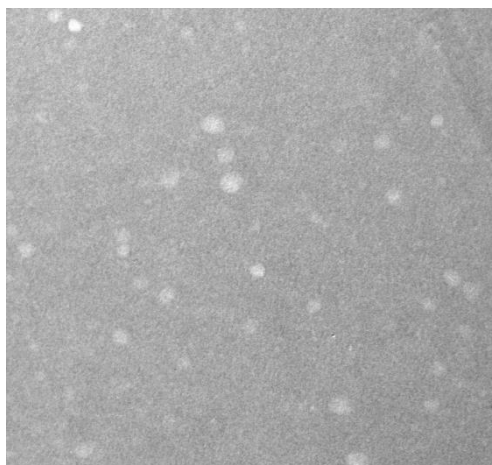

**Supplementary Figure S1.** Representative micrograph of transmission electron microscopy of EVs isolated from 200 ul of serum.

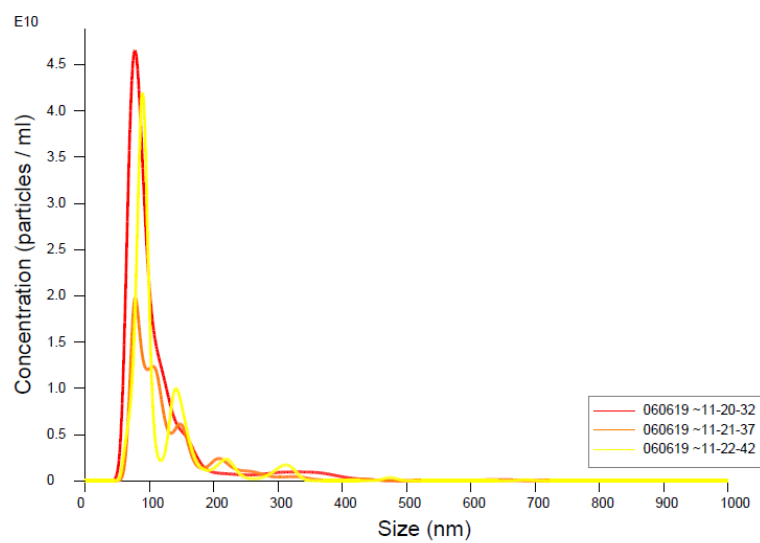

**Supplementary Figure S2.** Representative nanoparticle tracking analysis of serum EVs showing the EVs size distribution.

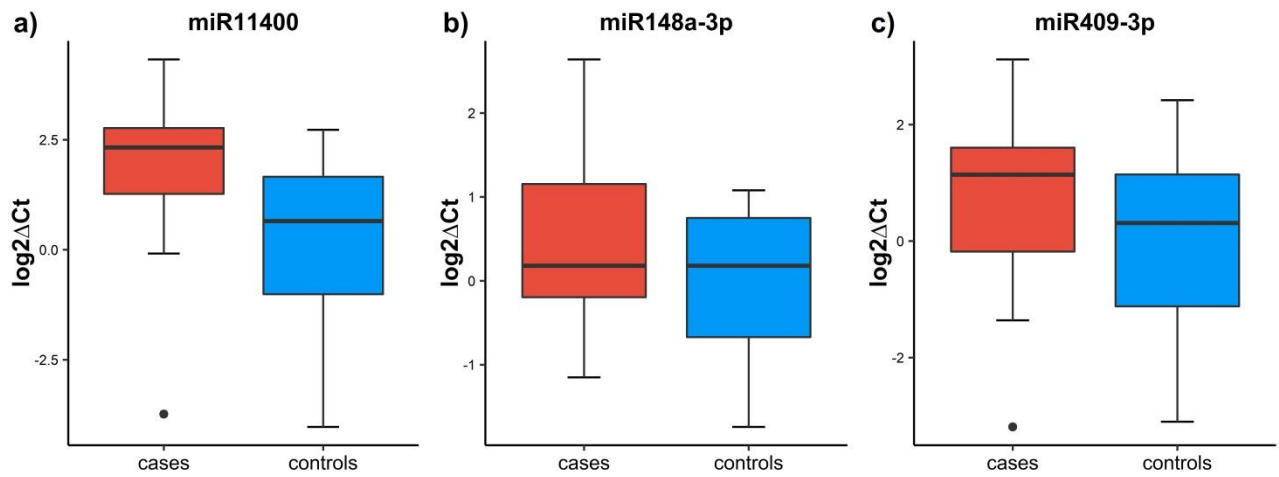

**Supplementary Figure S3.** Results of RT-qPCR validation of miR-11400 (a), miR-148a-3p (b) and miR-409-3p (c) in 19 pre-clinical MPM samples and 19 matched controls. Box-and-whiskers plots present the first quartile, median and third quartile, minimum and maximum values and outliers that are marked outside the whiskers range. Wilcoxon's test revealed no significant difference between cases and controls.

**Supplementary Tables**

**Supplementary Table S1.** Primary sequence of miRNAs analysed by RT-qPCR.

|            |                                      |
|------------|--------------------------------------|
| miR-92b-3p | 5'-<br>UAUUGCACUCGUCCCGGCCUGU-<br>3' |
| miR-148a   | 5'-<br>UCAGUGCACUACAGAACUUUGU-<br>3' |
| miR-409-3p | 5'-<br>GAAUGUUGCUCGGUGAACCCCU-<br>3' |
| miR-11400  | 5'-<br>UCGGCUGUGUAUCUCUGUGUC-3'      |

**Supplementary Table S2.** MiRNA NGS pre-processing statistics.

| SAMPLE  | raw reads <sup>a</sup> | cutadap<br>pt<br>short<br>reads <sup>b</sup> | cutadap<br>t<br>short<br>reads<br>/raw<br>reads | cutadap<br>t<br>adapter<br>reads <sup>c</sup> | cutadap<br>pt<br>adapter<br>reads/ra<br>w reads | clean<br>read<br>s <sup>d</sup> | clean<br>reads/r<br>aw<br>reads | aligned <sup>e</sup> | align<br>e<br>d/clea<br>n<br>reads | aligned/ra<br>w reads | well<br>align<br>e<br>d <sup>f</sup> | well<br>aligned/ali<br>gned | well<br>aligned/raw<br>reads |
|---------|------------------------|----------------------------------------------|-------------------------------------------------|-----------------------------------------------|-------------------------------------------------|---------------------------------|---------------------------------|----------------------|------------------------------------|-----------------------|--------------------------------------|-----------------------------|------------------------------|
| EPIC_1  | 1E+07                  | 33209<br>36                                  | 0.321                                           | 10299067                                      | 0.996                                           | 7019<br>306                     | 0.679                           | 332681<br>6          | 0.474                              | 0.322                 | 65103<br>5                           | 0.196                       | 0.063                        |
| EPIC_2  | 1E+07                  | 35344<br>63                                  | 0.347                                           | 10175702                                      | 0.999                                           | 6655<br>746                     | 0.653                           | 262927<br>6          | 0.395                              | 0.258                 | 74554<br>6                           | 0.284                       | 0.073                        |
| EPIC_3  | 8E+06                  | 27876<br>01                                  | 0.358                                           | 7757391                                       | 0.997                                           | 4995<br>032                     | 0.642                           | 205657<br>0          | 0.412                              | 0.264                 | 25297<br>0                           | 0.123                       | 0.033                        |
| EPIC_4  | 1E+07                  | 52639<br>65                                  | 0.379                                           | 13846188                                      | 0.997                                           | 8628<br>392                     | 0.621                           | 292389<br>1          | 0.339                              | 0.210                 | 13976<br>8                           | 0.048                       | 0.010                        |
| EPIC_5  | 1E+07                  | 33731<br>52                                  | 0.346                                           | 9729351                                       | 0.999                                           | 6370<br>430                     | 0.654                           | 239263<br>8          | 0.376                              | 0.246                 | 47756<br>3                           | 0.200                       | 0.049                        |
| EPIC_6  | 2E+07                  | 44588<br>47                                  | 0.270                                           | 16440279                                      | 0.996                                           | 1204<br>8500                    | 0.730                           | 555027<br>6          | 0.461                              | 0.336                 | 84377<br>8                           | 0.152                       | 0.051                        |
| EPIC_7  | 4E+06                  | 20801<br>66                                  | 0.465                                           | 4456365                                       | 0.997                                           | 2389<br>116                     | 0.535                           | 114615<br>9          | 0.480                              | 0.256                 | 17325<br>0                           | 0.151                       | 0.039                        |
| EPIC_8  | 2E+07                  | 46588<br>59                                  | 0.303                                           | 15336691                                      | 0.996                                           | 1073<br>6170                    | 0.697                           | 525576<br>0          | 0.490                              | 0.341                 | 11436<br>26                          | 0.218                       | 0.074                        |
| EPIC_9  | 1E+07                  | 35848<br>13                                  | 0.315                                           | 11336144                                      | 0.997                                           | 7784<br>812                     | 0.685                           | 295306<br>0          | 0.379                              | 0.260                 | 18722<br>1                           | 0.063                       | 0.016                        |
| EPIC_10 | 1E+07                  | 46444<br>33                                  | 0.350                                           | 13170678                                      | 0.993                                           | 8616<br>495                     | 0.650                           | 405543<br>5          | 0.471                              | 0.306                 | 43909<br>9                           | 0.108                       | 0.033                        |
| EPIC_11 | 1E+07                  | 16776<br>71                                  | 0.171                                           | 9792948                                       | 0.997                                           | 8146<br>003                     | 0.829                           | 426663<br>9          | 0.524                              | 0.434                 | 11906<br>53                          | 0.279                       | 0.121                        |
| EPIC_12 | 6E+06                  | 22329<br>65                                  | 0.370                                           | 6018288                                       | 0.998                                           | 3794<br>539                     | 0.630                           | 139641<br>3          | 0.368                              | 0.232                 | 14604<br>0                           | 0.105                       | 0.024                        |
| EPIC_13 | 7E+06                  | 11627<br>02                                  | 0.160                                           | 7228287                                       | 0.996                                           | 6091<br>739                     | 0.840                           | 344602<br>0          | 0.566                              | 0.475                 | 78246<br>7                           | 0.227                       | 0.108                        |



| SAMPLE  | raw reads <sup>a</sup> | cutad<br>pt<br>short<br>reads <sup>b</sup> | cutad<br>apt<br>short<br>reads<br>/raw<br>reads | cutadap<br>t adapter<br>reads <sup>c</sup> | cutadpa<br>pt<br>adapter<br>reads/ra<br>w reads | clean<br>read<br>s <sup>d</sup> | clean<br>reads/r<br>aw<br>reads | aligned <sup>e</sup> | align<br>e<br>d/clea<br>n<br>reads | aligned/ra<br>w reads | well<br>align<br>e<br>d <sup>f</sup> | well<br>aligned/ali<br>gned | well<br>aligned/raw<br>reads |
|---------|------------------------|--------------------------------------------|-------------------------------------------------|--------------------------------------------|-------------------------------------------------|---------------------------------|---------------------------------|----------------------|------------------------------------|-----------------------|--------------------------------------|-----------------------------|------------------------------|
| EPIC_14 | 7E+06                  | 13080<br>83                                | 0.191                                           | 6830754                                    | 0.997                                           | 5541<br>298                     | 0.809                           | 269253<br>5          | 0.486                              | 0.393                 | 64038<br>3                           | 0.238                       | 0.093                        |
| EPIC_15 | 1E+07                  | 60522<br>35                                | 0.561                                           | 10754157                                   | 0.997                                           | 4735<br>100                     | 0.439                           | 275080<br>0          | 0.581                              | 0.255                 | 92388<br>1                           | 0.336                       | 0.086                        |
| EPIC_16 | 3E+06                  | 10053<br>79                                | 0.336                                           | 2971919                                    | 0.995                                           | 1982<br>521                     | 0.664                           | 795750               | 0.401                              | 0.266                 | 24251                                | 0.030                       | 0.008                        |
| EPIC_17 | 5E+06                  | 17507<br>07                                | 0.374                                           | 4681043                                    | 0.999                                           | 2935<br>307                     | 0.626                           | 865542               | 0.295                              | 0.185                 | 39420                                | 0.046                       | 0.008                        |
| EPIC_18 | 1E+07                  | 42431<br>48                                | 0.337                                           | 12563505                                   | 0.997                                           | 8357<br>012                     | 0.663                           | 331708<br>2          | 0.397                              | 0.263                 | 36923<br>6                           | 0.111                       | 0.029                        |
| EPIC_19 | 3E+06                  | 45218<br>8                                 | 0.150                                           | 3004579                                    | 0.999                                           | 2556<br>003                     | 0.850                           | 136495<br>7          | 0.534                              | 0.454                 | 30814<br>2                           | 0.226                       | 0.102                        |
| EPIC_20 | 4E+06                  | 10283<br>79                                | 0.274                                           | 3743489                                    | 0.999                                           | 2720<br>034                     | 0.726                           | 134669<br>6          | 0.495                              | 0.359                 | 19279<br>7                           | 0.143                       | 0.051                        |
| EPIC_21 | 7E+06                  | 25775<br>26                                | 0.377                                           | 6828867                                    | 0.998                                           | 4265<br>209                     | 0.623                           | 144749<br>6          | 0.339                              | 0.212                 | 20489<br>3                           | 0.142                       | 0.030                        |
| EPIC_22 | 3E+07                  | 15807<br>681                               | 0.515                                           | 30496418                                   | 0.994                                           | 1487<br>3539                    | 0.485                           | 579405<br>1          | 0.390                              | 0.189                 | 79381<br>0                           | 0.137                       | 0.026                        |
| EPIC_23 | 3E+06                  | 85993<br>1                                 | 0.279                                           | 3072285                                    | 0.997                                           | 2220<br>406                     | 0.721                           | 133771<br>1          | 0.602                              | 0.434                 | 64858<br>6                           | 0.485                       | 0.211                        |
| EPIC_24 | 1E+07                  | 20378<br>33                                | 0.183                                           | 11116727                                   | 0.996                                           | 9122<br>129                     | 0.817                           | 499286<br>5          | 0.547                              | 0.447                 | 15373<br>14                          | 0.308                       | 0.138                        |
| EPIC_25 | 7E+06                  | 13033<br>20                                | 0.190                                           | 6826254                                    | 0.997                                           | 5543<br>149                     | 0.810                           | 249045<br>5          | 0.449                              | 0.364                 | 31387<br>1                           | 0.126                       | 0.046                        |
| EPIC_26 | 1E+07                  | 42365<br>76                                | 0.339                                           | 12452959                                   | 0.998                                           | 8246<br>555                     | 0.661                           | 298229<br>9          | 0.362                              | 0.239                 | 25195<br>6                           | 0.084                       | 0.020                        |
| EPIC_27 | 8E+06                  | 26614<br>97                                | 0.320                                           | 8291691                                    | 0.996                                           | 5661<br>079                     | 0.680                           | 225489<br>4          | 0.398                              | 0.271                 | 24476<br>8                           | 0.109                       | 0.029                        |
| EPIC_28 | 5E+06                  | 19666<br>58                                | 0.374                                           | 5246241                                    | 0.997                                           | 3295<br>037                     | 0.626                           | 123284<br>5          | 0.374                              | 0.234                 | 12626<br>1                           | 0.102                       | 0.024                        |

| SAMPLE  | raw reads <sup>a</sup> | cutad<br>pt<br>short<br>reads <sup>b</sup> | cutad<br>apt<br>short<br>reads<br>/raw<br>reads | cutadap<br>t adapter<br>reads <sup>c</sup> | cutadpa<br>pt<br>adapter<br>reads/ra<br>w reads | clean<br>read<br>s <sup>d</sup> | clean<br>reads/r<br>aw<br>reads | aligned <sup>e</sup> | align<br>e<br>d/clea<br>n<br>reads | aligned/ra<br>w reads | well<br>align<br>e<br>d <sup>f</sup> | well<br>aligned/ali<br>gned | well<br>aligned/raw<br>reads |
|---------|------------------------|--------------------------------------------|-------------------------------------------------|--------------------------------------------|-------------------------------------------------|---------------------------------|---------------------------------|----------------------|------------------------------------|-----------------------|--------------------------------------|-----------------------------|------------------------------|
| EPIC_29 | 6E+06                  | 12176<br>87                                | 0.189                                           | 6440452                                    | 0.998                                           | 5234<br>843                     | 0.811                           | 281384<br>8          | 0.538                              | 0.436                 | 50815<br>1                           | 0.181                       | 0.079                        |
| EPIC_30 | 1E+07                  | 37422<br>13                                | 0.325                                           | 11502248                                   | 0.999                                           | 7775<br>404                     | 0.675                           | 271954<br>7          | 0.350                              | 0.236                 | 27428<br>8                           | 0.101                       | 0.024                        |
| EPIC_31 | 1E+07                  | 40872<br>46                                | 0.382                                           | 10666362                                   | 0.997                                           | 6607<br>108                     | 0.618                           | 230463<br>9          | 0.349                              | 0.216                 | 16109<br>3                           | 0.070                       | 0.015                        |
| EPIC_32 | 4E+06                  | 62925<br>4                                 | 0.156                                           | 4029376                                    | 0.999                                           | 3404<br>952                     | 0.844                           | 164896<br>3          | 0.484                              | 0.409                 | 22432<br>8                           | 0.136                       | 0.056                        |
| EPIC_33 | 2E+07                  | 49479<br>64                                | 0.320                                           | 15324390                                   | 0.992                                           | 1050<br>7536                    | 0.680                           | 528092<br>4          | 0.503                              | 0.342                 | 10933<br>90                          | 0.207                       | 0.071                        |
| EPIC_34 | 9E+06                  | 12758<br>09                                | 0.146                                           | 8678217                                    | 0.996                                           | 7434<br>412                     | 0.854                           | 453329<br>7          | 0.610                              | 0.520                 | 15595<br>15                          | 0.344                       | 0.179                        |
| EPIC_35 | 2E+07                  | 57910<br>72                                | 0.309                                           | 18671884                                   | 0.996                                           | 1295<br>8233                    | 0.691                           | 615719<br>3          | 0.475                              | 0.328                 | 87019<br>9                           | 0.141                       | 0.046                        |
| EPIC_36 | 1E+07                  | 20098<br>57                                | 0.183                                           | 10931243                                   | 0.997                                           | 8956<br>444                     | 0.817                           | 415771<br>6          | 0.464                              | 0.379                 | 73824<br>1                           | 0.178                       | 0.067                        |
| EPIC_37 | 5E+06                  | 18075<br>07                                | 0.337                                           | 5352958                                    | 0.999                                           | 3552<br>460                     | 0.663                           | 135674<br>6          | 0.382                              | 0.253                 | 24948<br>7                           | 0.184                       | 0.047                        |
| EPIC_38 | 2E+07                  | 39968<br>14                                | 0.207                                           | 19159453                                   | 0.994                                           | 1528<br>3810                    | 0.793                           | 764154<br>7          | 0.500                              | 0.396                 | 18539<br>99                          | 0.243                       | 0.096                        |
| EPIC_39 | 1E+07                  | 33711<br>92                                | 0.337                                           | 9998778                                    | 0.998                                           | 6643<br>136                     | 0.663                           | 348805<br>4          | 0.525                              | 0.348                 | 76926<br>4                           | 0.221                       | 0.077                        |
| EPIC_40 | 1E+07                  | 41617<br>86                                | 0.306                                           | 13560426                                   | 0.996                                           | 9451<br>059                     | 0.694                           | 446396<br>7          | 0.472                              | 0.328                 | 11186<br>38                          | 0.251                       | 0.082                        |
| EPIC_41 | 1E+07                  | 27414<br>23                                | 0.286                                           | 9564739                                    | 0.997                                           | 6848<br>659                     | 0.714                           | 264388<br>6          | 0.386                              | 0.276                 | 22728<br>5                           | 0.086                       | 0.024                        |
| EPIC_42 | 1E+07                  | 39122<br>51                                | 0.361                                           | 10808756                                   | 0.998                                           | 6915<br>098                     | 0.639                           | 292972<br>7          | 0.424                              | 0.271                 | 56450<br>9                           | 0.193                       | 0.052                        |
| EPIC_43 | 1E+07                  | 21524<br>72                                | 0.166                                           | 12919556                                   | 0.996                                           | 1082<br>4363                    | 0.834                           | 628840<br>3          | 0.581                              | 0.485                 | 16652<br>09                          | 0.265                       | 0.128                        |

| SAMPLE  | raw reads <sup>a</sup> | cutadap<br>t short<br>reads <sup>b</sup> | cutadap<br>t short<br>reads<br>/raw<br>reads | cutadap<br>t adapter<br>reads <sup>c</sup> | cutadap<br>t adapter<br>reads/ra<br>w reads | clean<br>read<br>s <sup>d</sup> | clean<br>reads/r<br>aw<br>reads | aligned <sup>e</sup> | align<br>e d/clea<br>n<br>reads | aligned/ra<br>w reads | well<br>align<br>e d <sup>f</sup> | well<br>aligned/ali<br>gned | well<br>aligned/raw<br>reads |
|---------|------------------------|------------------------------------------|----------------------------------------------|--------------------------------------------|---------------------------------------------|---------------------------------|---------------------------------|----------------------|---------------------------------|-----------------------|-----------------------------------|-----------------------------|------------------------------|
| EPIC_44 | 6E+06                  | 1471603                                  | 0.242                                        | 6070527                                    | 0.999                                       | 4606546                         | 0.758                           | 2144691              | 0.466                           | 0.353                 | 356293                            | 0.166                       | 0.059                        |
| EPIC_45 | 1E+07                  | 4134486                                  | 0.355                                        | 11592972                                   | 0.996                                       | 7503987                         | 0.645                           | 2937807              | 0.391                           | 0.252                 | 402245                            | 0.137                       | 0.035                        |
| EPIC_46 | 2E+07                  | 5221036                                  | 0.289                                        | 18003476                                   | 0.997                                       | 12829765                        | 0.711                           | 5072030              | 0.395                           | 0.281                 | 347989                            | 0.069                       | 0.019                        |
| EPIC_47 | 9E+06                  | 2792040                                  | 0.322                                        | 8647123                                    | 0.999                                       | 5866061                         | 0.678                           | 2589914              | 0.442                           | 0.299                 | 564706                            | 0.218                       | 0.065                        |
| EPIC_48 | 2E+07                  | 4161158                                  | 0.241                                        | 17187633                                   | 0.997                                       | 13069968                        | 0.759                           | 5570858              | 0.426                           | 0.323                 | 512999                            | 0.092                       | 0.030                        |
| EPIC_49 | 1E+07                  | 4640829                                  | 0.331                                        | 14008753                                   | 0.998                                       | 9395180                         | 0.669                           | 4338882              | 0.462                           | 0.309                 | 799378                            | 0.184                       | 0.057                        |
| EPIC_50 | 7E+06                  | 2258026                                  | 0.324                                        | 6958257                                    | 0.999                                       | 4708970                         | 0.676                           | 1639754              | 0.348                           | 0.235                 | 253354                            | 0.155                       | 0.036                        |
| EPIC_51 | 8E+06                  | 2293348                                  | 0.303                                        | 7554373                                    | 0.999                                       | 5269998                         | 0.697                           | 2145240              | 0.407                           | 0.284                 | 158710                            | 0.074                       | 0.021                        |
| EPIC_52 | 4E+06                  | 739276                                   | 0.167                                        | 4429919                                    | 0.999                                       | 3696781                         | 0.833                           | 2037162              | 0.551                           | 0.459                 | 537431                            | 0.264                       | 0.121                        |
| EPIC_53 | 6E+06                  | 2047254                                  | 0.354                                        | 5778640                                    | 0.999                                       | 3739376                         | 0.646                           | 1315733              | 0.352                           | 0.227                 | 156104                            | 0.119                       | 0.027                        |
| EPIC_54 | 7E+06                  | 2195801                                  | 0.330                                        | 6649502                                    | 0.998                                       | 4464395                         | 0.670                           | 1786150              | 0.400                           | 0.268                 | 189549                            | 0.106                       | 0.028                        |
| EPIC_55 | 6E+06                  | 965860                                   | 0.175                                        | 5515272                                    | 0.998                                       | 4561232                         | 0.825                           | 2554351              | 0.560                           | 0.462                 | 462131                            | 0.181                       | 0.084                        |
| EPIC_56 | 4E+06                  | 670441                                   | 0.156                                        | 4285746                                    | 0.998                                       | 3621981                         | 0.844                           | 1927428              | 0.532                           | 0.449                 | 374944                            | 0.195                       | 0.087                        |
| EPIC_57 | 8E+06                  | 2218284                                  | 0.262                                        | 8418268                                    | 0.994                                       | 6253892                         | 0.738                           | 3614618              | 0.578                           | 0.427                 | 518623                            | 0.143                       | 0.061                        |
| EPIC_58 | 5E+06                  | 1563015                                  | 0.301                                        | 5157276                                    | 0.993                                       | 3631947                         | 0.699                           | 2483146              | 0.684                           | 0.478                 | 564108                            | 0.227                       | 0.109                        |

| SAMPLE  | raw reads <sup>a</sup> | cutad<br>pt<br>short<br>reads <sup>b</sup> | cutad<br>apt<br>short<br>reads<br>/raw<br>reads | cutadap<br>t adapter<br>reads <sup>c</sup> | cutadpa<br>pt<br>adapter<br>reads/ra<br>w reads | clean<br>read<br>s <sup>d</sup> | clean<br>reads/r<br>aw<br>reads | aligned <sup>e</sup> | align<br>e<br>d/clea<br>n<br>reads | aligned/ra<br>w reads | well<br>align<br>e<br>d <sup>f</sup> | well<br>aligned/ali<br>gned | well<br>aligned/raw<br>reads |
|---------|------------------------|--------------------------------------------|-------------------------------------------------|--------------------------------------------|-------------------------------------------------|---------------------------------|---------------------------------|----------------------|------------------------------------|-----------------------|--------------------------------------|-----------------------------|------------------------------|
| EPIC_59 | 9E+06                  | 20051<br>35                                | 0.232                                           | 8638047                                    | 0.999                                           | 6644<br>587                     | 0.768                           | 383248<br>7          | 0.577                              | 0.443                 | 18080<br>53                          | 0.472                       | 0.209                        |
| EPIC_60 | 3E+06                  | 12169<br>12                                | 0.350                                           | 3453196                                    | 0.993                                           | 2261<br>701                     | 0.650                           | 111314<br>6          | 0.492                              | 0.320                 | 14376<br>7                           | 0.129                       | 0.041                        |
| EPIC_61 | 6E+06                  | 24027<br>35                                | 0.392                                           | 6088155                                    | 0.993                                           | 3727<br>962                     | 0.608                           | 237005<br>3          | 0.636                              | 0.387                 | 71901<br>6                           | 0.303                       | 0.117                        |
| EPIC_62 | 6E+06                  | 24037<br>73                                | 0.410                                           | 5815637                                    | 0.991                                           | 3464<br>635                     | 0.590                           | 179119<br>2          | 0.517                              | 0.305                 | 27449<br>0                           | 0.153                       | 0.047                        |
| EPIC_63 | 1E+07                  | 32387<br>51                                | 0.289                                           | 11210919                                   | 0.999                                           | 7986<br>029                     | 0.711                           | 306106<br>4          | 0.383                              | 0.273                 | 56044<br>8                           | 0.183                       | 0.050                        |
| EPIC_64 | 1E+07                  | 38460<br>00                                | 0.326                                           | 11738299                                   | 0.996                                           | 7942<br>484                     | 0.674                           | 387988<br>7          | 0.488                              | 0.329                 | 37457<br>8                           | 0.097                       | 0.032                        |
| EPIC_65 | 6E+06                  | 19112<br>99                                | 0.302                                           | 6315738                                    | 0.999                                           | 4412<br>346                     | 0.698                           | 142363<br>6          | 0.323                              | 0.225                 | 90066                                | 0.063                       | 0.014                        |
| EPIC_66 | 1E+07                  | 51929<br>03                                | 0.382                                           | 13495162                                   | 0.992                                           | 8405<br>050                     | 0.618                           | 445862<br>4          | 0.530                              | 0.328                 | 87989<br>4                           | 0.197                       | 0.065                        |
| EPIC_67 | 1E+07                  | 49840<br>08                                | 0.368                                           | 13482096                                   | 0.995                                           | 8562<br>833                     | 0.632                           | 381725<br>8          | 0.446                              | 0.282                 | 29509<br>2                           | 0.077                       | 0.022                        |
| EPIC_68 | 1E+07                  | 45349<br>46                                | 0.362                                           | 12461193                                   | 0.996                                           | 7981<br>016                     | 0.638                           | 413626<br>8          | 0.518                              | 0.330                 | 50422<br>0                           | 0.122                       | 0.040                        |
| EPIC_69 | 2E+07                  | 59061<br>64                                | 0.367                                           | 15983860                                   | 0.994                                           | 1016<br>7766                    | 0.633                           | 449482<br>1          | 0.442                              | 0.280                 | 39301<br>7                           | 0.087                       | 0.024                        |
| EPIC_70 | 3E+06                  | 13283<br>50                                | 0.388                                           | 3405137                                    | 0.995                                           | 2095<br>117                     | 0.612                           | 866145               | 0.413                              | 0.253                 | 30898                                | 0.036                       | 0.009                        |
| EPIC_71 | 2E+07                  | 44341<br>47                                | 0.239                                           | 18508259                                   | 0.997                                           | 1413<br>3071                    | 0.761                           | 537502<br>3          | 0.380                              | 0.289                 | 30690<br>2                           | 0.057                       | 0.017                        |
| EPIC_72 | 2E+07                  | 47496<br>90                                | 0.235                                           | 20108115                                   | 0.996                                           | 1544<br>7565                    | 0.765                           | 702226<br>6          | 0.455                              | 0.348                 | 10418<br>65                          | 0.148                       | 0.052                        |
| EPIC_73 | 1E+07                  | 18191<br>25                                | 0.191                                           | 9469308                                    | 0.995                                           | 7695<br>502                     | 0.809                           | 408897<br>5          | 0.531                              | 0.430                 | 77472<br>5                           | 0.189                       | 0.081                        |

| SAMPLE  | raw reads <sup>a</sup> | cutad<br>pt<br>short<br>reads <sup>b</sup> | cutad<br>apt<br>short<br>reads<br>/raw<br>reads | cutadap<br>t adapter<br>reads <sup>c</sup> | cutadpa<br>pt<br>adapter<br>reads/ra<br>w reads | clean<br>read<br>s <sup>d</sup> | clean<br>reads/r<br>aw<br>reads | aligned <sup>e</sup> | align<br>e<br>d/clea<br>n<br>reads | aligned/ra<br>w reads | well<br>align<br>e<br>d <sup>f</sup> | well<br>aligned/ali<br>gned | well<br>aligned/raw<br>reads |
|---------|------------------------|--------------------------------------------|-------------------------------------------------|--------------------------------------------|-------------------------------------------------|---------------------------------|---------------------------------|----------------------|------------------------------------|-----------------------|--------------------------------------|-----------------------------|------------------------------|
| EPIC_74 | 5E+06                  | 92689                                      | 0.200                                           | 4627952                                    | 0.999                                           | 3707562                         | 0.800                           | 1859019              | 0.501                              | 0.401                 | 349537                               | 0.188                       | 0.075                        |
| EPIC_75 | 1E+07                  | 173848                                     | 0.156                                           | 11108236                                   | 0.996                                           | 9413456                         | 0.844                           | 5054657              | 0.537                              | 0.453                 | 990747                               | 0.196                       | 0.089                        |
| EPIC_76 | 5E+06                  | 857991                                     | 0.176                                           | 4868172                                    | 0.998                                           | 4017646                         | 0.824                           | 2300615              | 0.573                              | 0.472                 | 398025                               | 0.173                       | 0.082                        |
| EPIC_77 | 3E+06                  | 470228                                     | 0.162                                           | 2904177                                    | 0.999                                           | 2437575                         | 0.838                           | 1136535              | 0.466                              | 0.391                 | 154675                               | 0.136                       | 0.053                        |
| EPIC_78 | 8E+06                  | 2565135                                    | 0.315                                           | 8132764                                    | 0.998                                           | 5581168                         | 0.685                           | 2068944              | 0.371                              | 0.254                 | 106427                               | 0.051                       | 0.013                        |
| EPIC_79 | 8E+06                  | 2795948                                    | 0.354                                           | 7873266                                    | 0.997                                           | 5099281                         | 0.646                           | 2012937              | 0.395                              | 0.255                 | 246634                               | 0.123                       | 0.031                        |
| EPIC_80 | 2E+07                  | 5206572                                    | 0.267                                           | 19462850                                   | 0.997                                           | 14321688                        | 0.733                           | 8165669              | 0.570                              | 0.418                 | 2856284                              | 0.350                       | 0.146                        |
| EPIC_81 | 1E+07                  | 4454262                                    | 0.352                                           | 12590754                                   | 0.995                                           | 8203681                         | 0.648                           | 3070512              | 0.374                              | 0.243                 | 255999                               | 0.083                       | 0.020                        |
| EPIC_82 | 2E+06                  | 1027265                                    | 0.427                                           | 2402837                                    | 0.998                                           | 1380695                         | 0.573                           | 592117               | 0.429                              | 0.246                 | 68423                                | 0.116                       | 0.028                        |
| EPIC_83 | 1E+07                  | 3696701                                    | 0.263                                           | 13971543                                   | 0.995                                           | 10344744                        | 0.737                           | 5485371              | 0.530                              | 0.391                 | 1087071                              | 0.198                       | 0.077                        |
| EPIC_84 | 1E+07                  | 4281379                                    | 0.360                                           | 11857828                                   | 0.998                                           | 7595456                         | 0.640                           | 2551803              | 0.336                              | 0.215                 | 406499                               | 0.159                       | 0.034                        |
| EPIC_85 | 2E+07                  | 5334623                                    | 0.337                                           | 15791276                                   | 0.997                                           | 10504412                        | 0.663                           | 3632625              | 0.346                              | 0.229                 | 159601                               | 0.044                       | 0.010                        |
| EPIC_86 | 8E+06                  | 2550739                                    | 0.317                                           | 7999704                                    | 0.995                                           | 5491514                         | 0.683                           | 1977481              | 0.360                              | 0.246                 | 58964                                | 0.030                       | 0.007                        |
| EPIC_87 | 3E+06                  | 1112692                                    | 0.352                                           | 3159661                                    | 0.999                                           | 2051364                         | 0.648                           | 635002               | 0.310                              | 0.201                 | 43024                                | 0.068                       | 0.014                        |
| EPIC_88 | 1E+07                  | 2836598                                    | 0.197                                           | 14343684                                   | 0.997                                           | 11555916                        | 0.803                           | 5803740              | 0.502                              | 0.403                 | 1305966                              | 0.225                       | 0.091                        |

| SAMPLE   | raw reads <sup>a</sup> | cutadap<br>t short<br>reads <sup>b</sup> | cutadap<br>t short<br>reads<br>/raw<br>reads | cutadap<br>t adapter<br>reads <sup>c</sup> | cutadap<br>t adapter<br>reads/ra<br>w reads | clean<br>read<br>s <sup>d</sup> | clean<br>reads/r<br>aw<br>reads | aligned <sup>e</sup> | align<br>ed/clea<br>n<br>reads | aligned/ra<br>w reads | well<br>align<br>ed <sup>f</sup> | well<br>aligned/ali<br>gned | well<br>aligned/raw<br>reads |
|----------|------------------------|------------------------------------------|----------------------------------------------|--------------------------------------------|---------------------------------------------|---------------------------------|---------------------------------|----------------------|--------------------------------|-----------------------|----------------------------------|-----------------------------|------------------------------|
| EPIC_89  | 6E+06                  | 30234<br>92                              | 0.505                                        | 5967267                                    | 0.997                                       | 2960<br>202                     | 0.495                           | 123249<br>3          | 0.416                          | 0.206                 | 10535<br>1                       | 0.085                       | 0.018                        |
| EPIC_90  | 2E+07                  | 48206<br>13                              | 0.310                                        | 15498018                                   | 0.997                                       | 1071<br>9911                    | 0.690                           | 476880<br>6          | 0.445                          | 0.307                 | 61992<br>2                       | 0.130                       | 0.040                        |
| EPIC_91  | 1E+07                  | 33088<br>49                              | 0.342                                        | 9641756                                    | 0.996                                       | 6367<br>151                     | 0.658                           | 244378<br>0          | 0.384                          | 0.253                 | 17713<br>0                       | 0.072                       | 0.018                        |
| EPIC_92  | 1E+07                  | 45122<br>93                              | 0.335                                        | 13425528                                   | 0.996                                       | 8966<br>746                     | 0.665                           | 424520<br>6          | 0.473                          | 0.315                 | 35002<br>6                       | 0.082                       | 0.026                        |
| EPIC_93  | 1E+07                  | 26946<br>04                              | 0.263                                        | 10180669                                   | 0.995                                       | 7539<br>129                     | 0.737                           | 310081<br>8          | 0.411                          | 0.303                 | 43024<br>4                       | 0.139                       | 0.042                        |
| EPIC_94  | 9E+06                  | 32346<br>14                              | 0.369                                        | 8750103                                    | 0.998                                       | 5528<br>666                     | 0.631                           | 236978<br>4          | 0.429                          | 0.270                 | 51803<br>4                       | 0.219                       | 0.059                        |
| EPIC_95  | 6E+06                  | 10695<br>47                              | 0.189                                        | 5647135                                    | 0.997                                       | 4593<br>934                     | 0.811                           | 229821<br>9          | 0.500                          | 0.406                 | 58011<br>0                       | 0.252                       | 0.102                        |
| EPIC_96  | 1E+07                  | 36162<br>34                              | 0.278                                        | 12977671                                   | 0.997                                       | 9403<br>455                     | 0.722                           | 462486<br>2          | 0.492                          | 0.355                 | 15362<br>81                      | 0.332                       | 0.118                        |
| EPIC_97  | 1E+07                  | 89657<br>24                              | 0.699                                        | 12786732                                   | 0.997                                       | 3864<br>677                     | 0.301                           | 174540<br>7          | 0.452                          | 0.136                 | 35793<br>8                       | 0.205                       | 0.028                        |
| EPIC_98  | 3E+06                  | 10129<br>75                              | 0.357                                        | 2822664                                    | 0.996                                       | 1821<br>565                     | 0.643                           | 743671               | 0.408                          | 0.262                 | 34583                            | 0.047                       | 0.012                        |
| EPIC_99  | 4E+06                  | 13206<br>73                              | 0.332                                        | 3969649                                    | 0.999                                       | 2653<br>804                     | 0.668                           | 861550               | 0.325                          | 0.217                 | 92449                            | 0.107                       | 0.023                        |
| EPIC_100 | 1E+07                  | 42622<br>88                              | 0.403                                        | 10538305                                   | 0.997                                       | 6306<br>020                     | 0.597                           | 245690<br>0          | 0.390                          | 0.232                 | 25535<br>2                       | 0.104                       | 0.024                        |
| EPIC_101 | 5E+06                  | 18762<br>84                              | 0.381                                        | 4915152                                    | 0.998                                       | 3050<br>003                     | 0.619                           | 151349<br>5          | 0.496                          | 0.307                 | 32468<br>5                       | 0.215                       | 0.066                        |
| EPIC_102 | 4E+06                  | 88225<br>3                               | 0.220                                        | 4009913                                    | 0.998                                       | 3134<br>690                     | 0.780                           | 162244<br>5          | 0.518                          | 0.404                 | 33901<br>2                       | 0.209                       | 0.084                        |
| EPIC_103 | 3E+06                  | 89488<br>9                               | 0.322                                        | 2777701                                    | 0.999                                       | 1886<br>056                     | 0.678                           | 824881               | 0.437                          | 0.297                 | 23669<br>6                       | 0.287                       | 0.085                        |

| SAMPLE   | raw reads <sup>a</sup> | cutadap<br>t short<br>reads <sup>b</sup> | cutadap<br>t short<br>reads<br>/raw<br>reads | cutadap<br>t adapter<br>reads <sup>c</sup> | cutadap<br>t adapter<br>reads/ra<br>w reads | clean<br>read<br>s <sup>d</sup> | clean<br>reads/r<br>aw<br>reads | aligned <sup>e</sup> | align<br>e d/clea<br>n<br>reads | aligned/ra<br>w reads | well<br>align<br>e d <sup>f</sup> | well<br>aligned/ali<br>gned | well<br>aligned/raw<br>reads |
|----------|------------------------|------------------------------------------|----------------------------------------------|--------------------------------------------|---------------------------------------------|---------------------------------|---------------------------------|----------------------|---------------------------------|-----------------------|-----------------------------------|-----------------------------|------------------------------|
| EPIC_104 | 1E+07                  | 53170<br>06                              | 0.396                                        | 13332308                                   | 0.994                                       | 8098<br>530                     | 0.604                           | 332484<br>4          | 0.411                           | 0.248                 | 20258<br>8                        | 0.061                       | 0.015                        |
| EPIC_105 | 4E+06                  | 15284<br>59                              | 0.354                                        | 4312898                                    | 0.999                                       | 2789<br>779                     | 0.646                           | 113160<br>1          | 0.406                           | 0.262                 | 36656<br>0                        | 0.324                       | 0.085                        |
| EPIC_106 | 1E+07                  | 19418<br>58                              | 0.182                                        | 10645521                                   | 0.996                                       | 8748<br>607                     | 0.818                           | 479664<br>7          | 0.548                           | 0.449                 | 13422<br>26                       | 0.280                       | 0.126                        |
| EPIC_107 | 1E+07                  | 16298<br>78                              | 0.165                                        | 9820782                                    | 0.997                                       | 8225<br>295                     | 0.835                           | 437639<br>5          | 0.532                           | 0.444                 | 84568<br>7                        | 0.193                       | 0.086                        |
| EPIC_108 | 1E+07                  | 52030<br>15                              | 0.381                                        | 13605040                                   | 0.997                                       | 8441<br>336                     | 0.619                           | 304730<br>1          | 0.361                           | 0.223                 | 27221<br>0                        | 0.089                       | 0.020                        |
| EPIC_109 | 6E+06                  | 21081<br>52                              | 0.382                                        | 5504353                                    | 0.997                                       | 3412<br>528                     | 0.618                           | 131502<br>9          | 0.385                           | 0.238                 | 16113<br>7                        | 0.123                       | 0.029                        |
| EPIC_110 | 1E+07                  | 51746<br>19                              | 0.409                                        | 12608993                                   | 0.998                                       | 7461<br>937                     | 0.591                           | 254780<br>2          | 0.341                           | 0.202                 | 12901<br>2                        | 0.051                       | 0.010                        |
| EPIC_111 | 6E+06                  | 98080<br>6                               | 0.156                                        | 6286791                                    | 0.999                                       | 5314<br>846                     | 0.844                           | 305816<br>9          | 0.575                           | 0.486                 | 76600<br>9                        | 0.250                       | 0.122                        |
| EPIC_112 | 1E+07                  | 56110<br>98                              | 0.388                                        | 14421525                                   | 0.998                                       | 8833<br>829                     | 0.612                           | 291708<br>3          | 0.330                           | 0.202                 | 41334<br>5                        | 0.142                       | 0.029                        |
| EPIC_113 | 2E+07                  | 51891<br>91                              | 0.319                                        | 16231411                                   | 0.997                                       | 1108<br>8963                    | 0.681                           | 391473<br>2          | 0.353                           | 0.240                 | 20325<br>9                        | 0.052                       | 0.012                        |
| EPIC_114 | 3E+06                  | 75206<br>4                               | 0.229                                        | 3280308                                    | 0.998                                       | 2533<br>590                     | 0.771                           | 133246<br>4          | 0.526                           | 0.406                 | 32163<br>1                        | 0.241                       | 0.098                        |
| EPIC_115 | 2E+07                  | 19710<br>23                              | 0.105                                        | 18615810                                   | 0.996                                       | 1672<br>4426                    | 0.895                           | 115306<br>27         | 0.689                           | 0.617                 | 29954<br>20                       | 0.260                       | 0.160                        |
| EPIC_116 | 1E+07                  | 23023<br>08                              | 0.230                                        | 9946251                                    | 0.994                                       | 7699<br>302                     | 0.770                           | 467423<br>3          | 0.607                           | 0.467                 | 11954<br>07                       | 0.256                       | 0.120                        |
| EPIC_117 | 2E+06                  | 61469<br>0                               | 0.283                                        | 2166323                                    | 0.996                                       | 1559<br>748                     | 0.717                           | 645624<br>9          | 0.414                           | 0.297                 | 12025<br>1                        | 0.186                       | 0.055                        |
| EPIC_118 | 2E+07                  | 29672<br>34                              | 0.151                                        | 19628818                                   | 0.996                                       | 1674<br>2600                    | 0.849                           | 996613<br>9          | 0.595                           | 0.506                 | 22676<br>30                       | 0.228                       | 0.115                        |

| SAMPLE   | raw reads <sup>a</sup> | cutad<br>pt<br>short<br>reads <sup>b</sup> | cutad<br>apt<br>short<br>reads<br>/raw<br>reads | cutadap<br>t adapter<br>reads <sup>c</sup> | cutadpa<br>pt<br>adapter<br>reads/ra<br>w reads | clean<br>read<br>s <sup>d</sup> | clean<br>reads/r<br>aw<br>reads | aligned <sup>e</sup> | align<br>e<br>d/clea<br>n<br>reads | aligned/ra<br>w reads | well<br>align<br>e<br>d <sup>f</sup> | well<br>aligned/ali<br>gned | well<br>aligned/raw<br>reads |
|----------|------------------------|--------------------------------------------|-------------------------------------------------|--------------------------------------------|-------------------------------------------------|---------------------------------|---------------------------------|----------------------|------------------------------------|-----------------------|--------------------------------------|-----------------------------|------------------------------|
| EPIC_119 | 7E+06                  | 25923<br>89                                | 0.356                                           | 7271216                                    | 0.998                                           | 4692<br>057                     | 0.644                           | 192131<br>7          | 0.409                              | 0.264                 | 51744<br>7                           | 0.269                       | 0.071                        |
| EPIC_120 | 2E+07                  | 32077<br>03                                | 0.154                                           | 20794026                                   | 0.995                                           | 1768<br>4735                    | 0.846                           | 101036<br>84         | 0.571                              | 0.484                 | 20408<br>40                          | 0.202                       | 0.098                        |
| EPIC_121 | 1E+07                  | 47224<br>27                                | 0.328                                           | 14390597                                   | 0.999                                           | 9689<br>042                     | 0.672                           | 415372<br>1          | 0.429                              | 0.288                 | 57044<br>3                           | 0.137                       | 0.040                        |
| EPIC_122 | 1E+07                  | 32487<br>36                                | 0.318                                           | 10172768                                   | 0.997                                           | 6953<br>391                     | 0.682                           | 280171<br>3          | 0.403                              | 0.275                 | 49030<br>1                           | 0.175                       | 0.048                        |
| EPIC_123 | 2E+07                  | 49164<br>53                                | 0.277                                           | 17687947                                   | 0.997                                           | 1282<br>0911                    | 0.723                           | 491565<br>9          | 0.383                              | 0.277                 | 27973<br>4                           | 0.057                       | 0.016                        |
| EPIC_124 | 1E+07                  | 35554<br>03                                | 0.329                                           | 10778104                                   | 0.998                                           | 7239<br>531                     | 0.671                           | 317000<br>5          | 0.438                              | 0.294                 | 48365<br>3                           | 0.153                       | 0.045                        |
| EPIC_125 | 1E+07                  | 15200<br>74                                | 0.103                                           | 14650745                                   | 0.995                                           | 1320<br>7873                    | 0.897                           | 946007<br>7          | 0.716                              | 0.642                 | 29941<br>67                          | 0.317                       | 0.203                        |
| EPIC_126 | 5E+06                  | 11416<br>40                                | 0.220                                           | 5191131                                    | 0.998                                           | 4058<br>656                     | 0.780                           | 216408<br>5          | 0.533                              | 0.416                 | 37475<br>4                           | 0.173                       | 0.072                        |
| EPIC_127 | 2E+07                  | 56511<br>69                                | 0.306                                           | 18436740                                   | 0.998                                           | 1283<br>1390                    | 0.694                           | 477926<br>5          | 0.372                              | 0.259                 | 29722<br>4                           | 0.062                       | 0.016                        |
| EPIC_128 | 6E+06                  | 20930<br>95                                | 0.334                                           | 6254225                                    | 0.997                                           | 4182<br>019                     | 0.666                           | 152492<br>1          | 0.365                              | 0.243                 | 13464<br>1                           | 0.088                       | 0.021                        |
| EPIC_129 | 7E+06                  | 25980<br>73                                | 0.359                                           | 7229256                                    | 0.998                                           | 4642<br>437                     | 0.641                           | 189736<br>2          | 0.409                              | 0.262                 | 30003<br>6                           | 0.158                       | 0.041                        |
| EPIC_130 | 7E+06                  | 20164<br>60                                | 0.274                                           | 7345436                                    | 0.997                                           | 5347<br>694                     | 0.726                           | 216139<br>4          | 0.404                              | 0.294                 | 26515<br>4                           | 0.123                       | 0.036                        |
| EPIC_131 | 2E+07                  | 43869<br>28                                | 0.274                                           | 15996695                                   | 0.998                                           | 1164<br>2579                    | 0.726                           | 466557<br>3          | 0.401                              | 0.291                 | 45303<br>1                           | 0.097                       | 0.028                        |
| EPIC_132 | 9E+06                  | 31005<br>29                                | 0.345                                           | 8981914                                    | 0.999                                           | 5893<br>052                     | 0.655                           | 211695<br>7          | 0.359                              | 0.235                 | 29451<br>2                           | 0.139                       | 0.033                        |
| EPIC_133 | 2E+06                  | 41517<br>0                                 | 0.184                                           | 2256180                                    | 0.999                                           | 1844<br>290                     | 0.816                           | 879473               | 0.477                              | 0.389                 | 12889<br>9                           | 0.147                       | 0.057                        |



| SAMPLE   | raw reads <sup>a</sup> | cutadap<br>t short<br>reads <sup>b</sup> | cutadap<br>t short<br>reads<br>/raw<br>reads | cutadap<br>t adapter<br>reads <sup>c</sup> | cutadap<br>t adapter<br>reads/ra<br>w reads | clean<br>read<br>s <sup>d</sup> | clean<br>reads/r<br>aw<br>reads | aligned <sup>e</sup> | align<br>ed/clea<br>n<br>reads | aligned/ra<br>w reads | well<br>align<br>ed <sup>f</sup> | well<br>aligned/ali<br>gned | well<br>aligned/raw<br>reads |
|----------|------------------------|------------------------------------------|----------------------------------------------|--------------------------------------------|---------------------------------------------|---------------------------------|---------------------------------|----------------------|--------------------------------|-----------------------|----------------------------------|-----------------------------|------------------------------|
| EPIC_134 | 5E+06                  | 12941<br>48                              | 0.239                                        | 5405534                                    | 0.998                                       | 4120<br>424                     | 0.761                           | 241089<br>6          | 0.585                          | 0.445                 | 69795<br>6                       | 0.290                       | 0.129                        |
| EPIC_135 | 1E+07                  | 48873<br>39                              | 0.355                                        | 13732827                                   | 0.998                                       | 8871<br>279                     | 0.645                           | 281101<br>5          | 0.317                          | 0.204                 | 25772<br>1                       | 0.092                       | 0.019                        |
| EPIC_136 | 6E+06                  | 15040<br>31                              | 0.246                                        | 6102361                                    | 0.998                                       | 4608<br>141                     | 0.754                           | 246600<br>7          | 0.535                          | 0.403                 | 28804<br>2                       | 0.117                       | 0.047                        |
| EPIC_137 | 7E+06                  | 12426<br>52                              | 0.166                                        | 7477256                                    | 0.998                                       | 6248<br>411                     | 0.834                           | 390131<br>6          | 0.624                          | 0.521                 | 77872<br>7                       | 0.200                       | 0.104                        |
| EPIC_138 | 3E+06                  | 40615<br>1                               | 0.127                                        | 3185285                                    | 0.999                                       | 2783<br>744                     | 0.873                           | 164151<br>3          | 0.590                          | 0.515                 | 26934<br>1                       | 0.164                       | 0.084                        |
| EPIC_139 | 2E+07                  | 46108<br>98                              | 0.305                                        | 15053524                                   | 0.994                                       | 1052<br>7540                    | 0.695                           | 482477<br>0          | 0.458                          | 0.319                 | 48005<br>5                       | 0.099                       | 0.032                        |
| EPIC_140 | 1E+07                  | 46360<br>35                              | 0.440                                        | 10464704                                   | 0.994                                       | 5889<br>442                     | 0.560                           | 286434<br>9          | 0.486                          | 0.272                 | 41672<br>7                       | 0.145                       | 0.040                        |
| EPIC_141 | 4E+06                  | 14391<br>79                              | 0.335                                        | 4287041                                    | 0.999                                       | 2854<br>116                     | 0.665                           | 945990               | 0.331                          | 0.220                 | 10202<br>3                       | 0.108                       | 0.024                        |
| EPIC_142 | 4E+06                  | 14649<br>77                              | 0.352                                        | 4133009                                    | 0.993                                       | 2696<br>746                     | 0.648                           | 176159<br>6          | 0.653                          | 0.423                 | 42987<br>6                       | 0.244                       | 0.103                        |
| EPIC_143 | 2E+07                  | 48583<br>43                              | 0.299                                        | 16165724                                   | 0.994                                       | 1139<br>9897                    | 0.701                           | 798276<br>1          | 0.700                          | 0.491                 | 37499<br>86                      | 0.470                       | 0.231                        |
| EPIC_144 | 6E+06                  | 19469<br>55                              | 0.328                                        | 5892044                                    | 0.992                                       | 3991<br>515                     | 0.672                           | 253245<br>4          | 0.634                          | 0.426                 | 61645<br>6                       | 0.243                       | 0.104                        |
| EPIC_145 | 7E+06                  | 23065<br>28                              | 0.319                                        | 7213176                                    | 0.998                                       | 4917<br>702                     | 0.681                           | 161688<br>1          | 0.329                          | 0.224                 | 13294<br>4                       | 0.082                       | 0.018                        |
| EPIC_146 | 1E+07                  | 50249<br>80                              | 0.366                                        | 13667418                                   | 0.995                                       | 8705<br>312                     | 0.634                           | 396234<br>4          | 0.455                          | 0.289                 | 38041<br>9                       | 0.096                       | 0.028                        |
| EPIC_147 | 5E+06                  | 14519<br>86                              | 0.292                                        | 4963252                                    | 0.999                                       | 3517<br>547                     | 0.708                           | 112583<br>2          | 0.320                          | 0.227                 | 85773                            | 0.076                       | 0.017                        |
| EPIC_148 | 2E+07                  | 53919<br>13                              | 0.317                                        | 16920040                                   | 0.996                                       | 1160<br>0741                    | 0.683                           | 506916<br>0          | 0.437                          | 0.298                 | 31483<br>5                       | 0.062                       | 0.019                        |

| SAMPLE   | raw reads <sup>a</sup> | cutadap<br>t short<br>reads <sup>b</sup> | cutadap<br>t short<br>reads<br>/raw<br>reads | cutadap<br>t adapter<br>reads <sup>c</sup> | cutadap<br>t adapter<br>reads/ra<br>w reads | clean<br>read<br>s <sup>d</sup> | clean<br>reads/r<br>aw<br>reads | aligned <sup>e</sup> | align<br>ed/clea<br>n<br>reads | aligned/ra<br>w reads | well<br>align<br>ed <sup>f</sup> | well<br>aligned/ali<br>gned | well<br>aligned/raw<br>reads |
|----------|------------------------|------------------------------------------|----------------------------------------------|--------------------------------------------|---------------------------------------------|---------------------------------|---------------------------------|----------------------|--------------------------------|-----------------------|----------------------------------|-----------------------------|------------------------------|
| EPIC_149 | 3E+07                  | 86894<br>87                              | 0.301                                        | 28757292                                   | 0.995                                       | 2022<br>2698                    | 0.699                           | 893734<br>5          | 0.442                          | 0.309                 | 50912<br>9                       | 0.057                       | 0.018                        |
| EPIC_150 | 1E+07                  | 36586<br>69                              | 0.282                                        | 12918065                                   | 0.996                                       | 9307<br>606                     | 0.718                           | 425571<br>2          | 0.457                          | 0.328                 | 29330<br>4                       | 0.069                       | 0.023                        |
| EPIC_151 | 3E+06                  | 12844<br>65                              | 0.385                                        | 3317513                                    | 0.994                                       | 2053<br>957                     | 0.615                           | 841638               | 0.410                          | 0.252                 | 28499                            | 0.034                       | 0.009                        |
| EPIC_152 | 1E+07                  | 45639<br>88                              | 0.327                                        | 13743700                                   | 0.983                                       | 9411<br>194                     | 0.673                           | 436823<br>9          | 0.464                          | 0.313                 | 26956<br>6                       | 0.062                       | 0.019                        |
| EPIC_153 | 1E+07                  | 30327<br>98                              | 0.217                                        | 13936867                                   | 0.996                                       | 1095<br>3447                    | 0.783                           | 461849<br>6          | 0.422                          | 0.330                 | 44940<br>6                       | 0.097                       | 0.032                        |
| EPIC_154 | 3E+07                  | 59753<br>01                              | 0.189                                        | 31487308                                   | 0.996                                       | 2564<br>6962                    | 0.811                           | 105334<br>41         | 0.411                          | 0.333                 | 78326<br>5                       | 0.074                       | 0.025                        |
| EPIC_155 | 1E+07                  | 22570<br>18                              | 0.222                                        | 10112936                                   | 0.995                                       | 7904<br>927                     | 0.778                           | 369379<br>2          | 0.467                          | 0.363                 | 51132<br>1                       | 0.138                       | 0.050                        |
| EPIC_156 | 6E+06                  | 19030<br>65                              | 0.324                                        | 5870435                                    | 0.998                                       | 3977<br>867                     | 0.676                           | 217129<br>7          | 0.546                          | 0.369                 | 25149<br>6                       | 0.116                       | 0.043                        |
| EPIC_157 | 4E+06                  | 80104<br>5                               | 0.192                                        | 4156760                                    | 0.996                                       | 3370<br>724                     | 0.808                           | 147252<br>7          | 0.437                          | 0.353                 | 17120<br>5                       | 0.116                       | 0.041                        |
| EPIC_158 | 5E+06                  | 93904<br>3                               | 0.179                                        | 5237576                                    | 0.999                                       | 4305<br>304                     | 0.821                           | 208108<br>0          | 0.483                          | 0.397                 | 25123<br>7                       | 0.121                       | 0.048                        |
| EPIC_159 | 4E+06                  | 74662<br>3                               | 0.200                                        | 3730780                                    | 0.999                                       | 2988<br>749                     | 0.800                           | 135856<br>4          | 0.455                          | 0.364                 | 14357<br>2                       | 0.106                       | 0.038                        |
| EPIC_160 | 9E+06                  | 26565<br>63                              | 0.303                                        | 8758322                                    | 0.998                                       | 6115<br>061                     | 0.697                           | 239474<br>1          | 0.392                          | 0.273                 | 16178<br>9                       | 0.068                       | 0.018                        |
| EPIC_161 | 1E+07                  | 43383<br>98                              | 0.395                                        | 10944937                                   | 0.997                                       | 6638<br>862                     | 0.605                           | 228849<br>9          | 0.345                          | 0.208                 | 92382                            | 0.040                       | 0.008                        |
| EPIC_162 | 1E+07                  | 49486<br>21                              | 0.342                                        | 14359990                                   | 0.993                                       | 9519<br>371                     | 0.658                           | 438882<br>0          | 0.461                          | 0.303                 | 82164<br>9                       | 0.187                       | 0.057                        |
| EPIC_163 | 1E+07                  | 42027<br>04                              | 0.363                                        | 11539231                                   | 0.997                                       | 7370<br>965                     | 0.637                           | 259535<br>4          | 0.352                          | 0.224                 | 16513<br>9                       | 0.064                       | 0.014                        |

| SAMPLE   | raw reads <sup>a</sup> | cutadapt short reads <sup>b</sup> | cutadapt short reads /raw reads | cutadapt adapter reads <sup>c</sup> | cutadapt adapter reads/raw reads | clean reads <sup>d</sup> | clean reads/raw reads | aligned <sup>e</sup> | aligned/clean reads | aligned/raw reads | well aligned <sup>f</sup> | well aligned/aligned | well aligned/raw reads |
|----------|------------------------|-----------------------------------|---------------------------------|-------------------------------------|----------------------------------|--------------------------|-----------------------|----------------------|---------------------|-------------------|---------------------------|----------------------|------------------------|
| EPIC_164 | 4E+06                  | 821755                            | 0.188                           | 4357654                             | 0.998                            | 3542572                  | 0.812                 | 1683672              | 0.475               | 0.386             | 190997                    | 0.113                | 0.044                  |

<sup>a</sup>raw reads

<sup>b</sup>cutadapt short reads

<sup>c</sup>cutadapt adapter reads

<sup>d</sup>clean reads

<sup>e</sup>aligned

<sup>f</sup>well aligned

**Supplementary Table S3.** Differentially expressed miRNAs between 80 pre-diagnostic MPM cases and 80 matched controls from NGS. Table shows the average expression for all identified miRNAs (base Mean), the differential expression reported as log2 fold change between cases and controls (Log2FC), the p-value from statistical analysis (p-value) and the p-value adjusted for multiple testing by FDR (p-adj).

| ID              | baseMean | log2FoldChange | p-value | FDR  |
|-----------------|----------|----------------|---------|------|
| hsa-let-7a-3p   | 45.58    | -0.045         | 0.607   | 0.96 |
| hsa-miR-323b-3p | 27.87    | 0.138          | 0.573   | 0.96 |
| hsa-miR-330-3p  | 59.49    | 0.224          | 0.103   | 0.96 |
| hsa-miR-335-3p  | 22.61    | 0.256          | 0.144   | 0.96 |
| hsa-miR-335-5p  | 21.58    | 0.111          | 0.399   | 0.96 |
| hsa-miR-339-3p  | 22.85    | -0.051         | 0.680   | 0.96 |
| hsa-miR-339-5p  | 29.33    | 0.057          | 0.695   | 0.96 |
| hsa-miR-340-5p  | 116.36   | 0.065          | 0.443   | 0.96 |
| hsa-miR-342-3p  | 26.65    | 0.132          | 0.362   | 0.96 |
| hsa-miR-342-5p  | 101.32   | 0.066          | 0.585   | 0.96 |
| hsa-miR-345-5p  | 18.94    | -0.091         | 0.508   | 0.96 |
| hsa-miR-361-3p  | 100.87   | 0.078          | 0.392   | 0.96 |
| hsa-miR-361-5p  | 17.17    | 0.076          | 0.580   | 0.96 |
| hsa-miR-3613-5p | 34.39    | 0.110          | 0.477   | 0.96 |
| hsa-miR-3615    | 606.27   | -0.049         | 0.646   | 0.96 |
| hsa-miR-363-3p  | 376.84   | -0.106         | 0.333   | 0.96 |
| hsa-miR-370-3p  | 90.41    | -0.122         | 0.555   | 0.96 |
| hsa-miR-374b-5p | 13.02    | 0.190          | 0.264   | 0.96 |
| hsa-miR-375-3p  | 149.22   | -0.194         | 0.320   | 0.96 |
| hsa-miR-378a-3p | 461.55   | -0.066         | 0.487   | 0.96 |
| hsa-miR-320d    | 58.31    | -0.065         | 0.691   | 0.96 |
| hsa-miR-378c    | 84.17    | -0.041         | 0.698   | 0.96 |
| hsa-miR-320b    | 1092.46  | -0.039         | 0.685   | 0.96 |
| hsa-miR-32-5p   | 29.01    | -0.175         | 0.113   | 0.96 |
| hsa-miR-222-3p  | 287.01   | 0.052          | 0.426   | 0.96 |
| hsa-miR-223-3p  | 103.13   | 0.053          | 0.715   | 0.96 |
| hsa-miR-223-5p  | 507.44   | -0.093         | 0.448   | 0.96 |
| hsa-miR-224-5p  | 94.85    | 0.157          | 0.399   | 0.96 |
| hsa-miR-23a-3p  | 82.02    | 0.104          | 0.424   | 0.96 |
| hsa-miR-24-2-5p | 20.91    | 0.202          | 0.072   | 0.96 |
| hsa-miR-24-3p   | 1768.35  | -0.089         | 0.154   | 0.96 |
| hsa-miR-25-3p   | 3748.06  | -0.135         | 0.248   | 0.96 |
| hsa-miR-26a-5p  | 9889.16  | 0.129          | 0.229   | 0.96 |
| hsa-miR-26b-5p  | 610.44   | 0.070          | 0.355   | 0.96 |
| hsa-miR-27a-3p  | 1085.40  | -0.094         | 0.404   | 0.96 |
| hsa-miR-99a-5p  | 1578.46  | 0.084          | 0.524   | 0.96 |
| hsa-miR-28-3p   | 240.54   | 0.078          | 0.370   | 0.96 |
| hsa-miR-28-5p   | 28.68    | 0.140          | 0.333   | 0.96 |
| hsa-miR-30b-5p  | 15.56    | 0.161          | 0.219   | 0.96 |
| hsa-miR-30c-5p  | 336.54   | 0.034          | 0.709   | 0.96 |
| hsa-miR-30e-3p  | 129.71   | 0.037          | 0.728   | 0.96 |
| hsa-miR-30e-5p  | 939.50   | -0.058         | 0.482   | 0.96 |

|                  |          |        |       |      |
|------------------|----------|--------|-------|------|
| hsa-miR-3158-3p  | 36.77    | -0.310 | 0.085 | 0.96 |
| hsa-miR-320a-3p  | 4702.58  | -0.093 | 0.300 | 0.96 |
| hsa-miR-221-3p   | 394.60   | 0.105  | 0.203 | 0.96 |
| hsa-miR-382-5p   | 71.99    | -0.071 | 0.719 | 0.96 |
| hsa-miR-423-5p   | 13919.98 | -0.075 | 0.442 | 0.96 |
| hsa-miR-505-5p   | 22.41    | 0.144  | 0.229 | 0.96 |
| hsa-miR-511-5p   | 19.90    | 0.121  | 0.531 | 0.96 |
| hsa-miR-532-5p   | 302.61   | -0.108 | 0.309 | 0.96 |
| hsa-miR-550a-5p  | 12.35    | -0.342 | 0.038 | 0.96 |
| hsa-miR-625-3p   | 143.63   | -0.068 | 0.618 | 0.96 |
| hsa-miR-628-3p   | 19.74    | 0.098  | 0.439 | 0.96 |
| hsa-miR-629-5p   | 188.28   | -0.134 | 0.220 | 0.96 |
| hsa-miR-652-3p   | 29.48    | 0.174  | 0.228 | 0.96 |
| hsa-miR-654-3p   | 29.65    | -0.192 | 0.368 | 0.96 |
| hsa-miR-654-5p   | 14.43    | -0.095 | 0.698 | 0.96 |
| hsa-miR-671-3p   | 30.26    | 0.202  | 0.212 | 0.96 |
| hsa-miR-6842-3p  | 19.13    | 0.158  | 0.267 | 0.96 |
| hsa-miR-7-5p     | 305.55   | -0.263 | 0.082 | 0.96 |
| hsa-miR-92a-3p   | 12475.53 | -0.119 | 0.236 | 0.96 |
| hsa-miR-92b-3p   | 96.77    | -0.107 | 0.278 | 0.96 |
| hsa-miR-93-5p    | 186.41   | -0.146 | 0.154 | 0.96 |
| hsa-miR-941      | 82.27    | 0.120  | 0.340 | 0.96 |
| hsa-miR-942-5p   | 17.65    | -0.222 | 0.102 | 0.96 |
| hsa-miR-98-5p    | 193.20   | 0.047  | 0.692 | 0.96 |
| hsa-miR-502-3p   | 14.40    | 0.181  | 0.279 | 0.96 |
| hsa-miR-423-3p   | 1750.59  | -0.074 | 0.309 | 0.96 |
| hsa-miR-501-3p   | 78.42    | 0.118  | 0.431 | 0.96 |
| hsa-miR-493-3p   | 26.52    | -0.122 | 0.613 | 0.96 |
| hsa-miR-425-3p   | 15.86    | -0.239 | 0.078 | 0.96 |
| hsa-miR-425-5p   | 256.94   | 0.031  | 0.666 | 0.96 |
| hsa-miR-432-5p   | 53.99    | -0.206 | 0.354 | 0.96 |
| hsa-miR-433-3p   | 25.38    | -0.170 | 0.474 | 0.96 |
| hsa-miR-4433b-3p | 48.98    | -0.126 | 0.654 | 0.96 |
| hsa-miR-4433b-5p | 88.06    | -0.142 | 0.433 | 0.96 |
| hsa-miR-4443     | 99.33    | 0.164  | 0.334 | 0.96 |
| hsa-miR-4446-3p  | 29.19    | 0.070  | 0.704 | 0.96 |
| hsa-miR-4488     | 17.05    | -0.182 | 0.416 | 0.96 |
| hsa-miR-4497     | 26.35    | -0.279 | 0.205 | 0.96 |
| hsa-miR-4508     | 223.96   | 0.114  | 0.606 | 0.96 |
| hsa-miR-4516     | 23.95    | 0.096  | 0.660 | 0.96 |
| hsa-miR-451a     | 45496.02 | -0.077 | 0.659 | 0.96 |
| hsa-miR-4732-3p  | 38.06    | -0.074 | 0.686 | 0.96 |
| hsa-miR-4732-5p  | 49.97    | -0.101 | 0.541 | 0.96 |
| hsa-miR-483-5p   | 39.18    | 0.095  | 0.658 | 0.96 |
| hsa-miR-485-5p   | 33.79    | -0.079 | 0.710 | 0.96 |
| hsa-miR-486-3p   | 159.19   | -0.160 | 0.232 | 0.96 |
| hsa-miR-486-5p   | 52351.70 | -0.066 | 0.674 | 0.96 |

|                 |          |        |       |      |
|-----------------|----------|--------|-------|------|
| hsa-miR-495-3p  | 22.27    | -0.118 | 0.581 | 0.96 |
| hsa-miR-22-5p   | 77.20    | -0.107 | 0.278 | 0.96 |
| hsa-miR-27a-5p  | 14.48    | -0.154 | 0.462 | 0.96 |
| hsa-miR-215-5p  | 50.65    | -0.180 | 0.268 | 0.96 |
| hsa-miR-126-5p  | 124.33   | 0.031  | 0.725 | 0.96 |
| hsa-miR-1301-3p | 65.63    | 0.083  | 0.498 | 0.96 |
| hsa-miR-1307-3p | 456.22   | -0.054 | 0.541 | 0.96 |
| hsa-miR-130b-5p | 34.99    | -0.058 | 0.700 | 0.96 |
| hsa-miR-139-3p  | 40.96    | 0.073  | 0.608 | 0.96 |
| hsa-miR-139-5p  | 191.66   | 0.213  | 0.023 | 0.96 |
| hsa-miR-140-3p  | 679.74   | -0.112 | 0.261 | 0.96 |
| hsa-miR-140-5p  | 46.37    | -0.095 | 0.338 | 0.96 |
| hsa-miR-126-3p  | 7395.61  | 0.041  | 0.624 | 0.96 |
| hsa-miR-142-3p  | 145.27   | 0.056  | 0.570 | 0.96 |
| hsa-miR-144-3p  | 180.26   | -0.057 | 0.668 | 0.96 |
| hsa-miR-144-5p  | 74.53    | -0.086 | 0.532 | 0.96 |
| hsa-miR-145-3p  | 30.83    | -0.109 | 0.439 | 0.96 |
| hsa-miR-146b-5p | 628.56   | 0.102  | 0.188 | 0.96 |
| hsa-miR-148a-3p | 8221.05  | -0.084 | 0.450 | 0.96 |
| hsa-miR-148b-3p | 333.13   | 0.044  | 0.547 | 0.96 |
| hsa-miR-150-5p  | 156.62   | 0.158  | 0.283 | 0.96 |
| hsa-miR-151a-5p | 18.01    | 0.247  | 0.156 | 0.96 |
| hsa-miR-142-5p  | 1451.60  | -0.099 | 0.356 | 0.96 |
| hsa-miR-155-5p  | 51.98    | 0.101  | 0.315 | 0.96 |
| hsa-miR-125b-5p | 105.84   | 0.056  | 0.667 | 0.96 |
| hsa-miR-1228-5p | 26.42    | -0.132 | 0.579 | 0.96 |
| hsa-let-7a-5p   | 4650.26  | 0.027  | 0.691 | 0.96 |
| hsa-let-7b-3p   | 14.01    | -0.118 | 0.417 | 0.96 |
| hsa-let-7b-5p   | 8901.25  | -0.074 | 0.506 | 0.96 |
| hsa-let-7c-5p   | 656.98   | -0.044 | 0.595 | 0.96 |
| hsa-let-7d-5p   | 686.33   | 0.057  | 0.428 | 0.96 |
| hsa-let-7e-5p   | 109.79   | 0.121  | 0.382 | 0.96 |
| hsa-let-7f-5p   | 5222.16  | 0.055  | 0.505 | 0.96 |
| hsa-let-7g-5p   | 2514.28  | 0.027  | 0.650 | 0.96 |
| hsa-miR-125a-5p | 321.45   | 0.151  | 0.138 | 0.96 |
| hsa-miR-100-5p  | 271.77   | -0.469 | 0.039 | 0.96 |
| hsa-miR-103a-3p | 356.30   | 0.029  | 0.713 | 0.96 |
| hsa-miR-106b-3p | 195.74   | -0.106 | 0.184 | 0.96 |
| hsa-miR-106b-5p | 37.43    | -0.168 | 0.278 | 0.96 |
| hsa-miR-107     | 105.85   | -0.046 | 0.711 | 0.96 |
| hsa-miR-10a-5p  | 1095.94  | -0.069 | 0.586 | 0.96 |
| hsa-miR-10b-5p  | 1834.93  | 0.093  | 0.467 | 0.96 |
| hsa-miR-11400   | 29.02    | -0.105 | 0.673 | 0.96 |
| hsa-miR-122-5p  | 15710.86 | 0.081  | 0.728 | 0.96 |
| hsa-miR-101-3p  | 1427.82  | -0.167 | 0.170 | 0.96 |
| hsa-miR-15a-5p  | 14.37    | 0.115  | 0.566 | 0.96 |
| hsa-miR-99b-5p  | 392.23   | 0.148  | 0.156 | 0.96 |

|                   |         |        |       |      |
|-------------------|---------|--------|-------|------|
| hsa-miR-191-5p    | 1382.79 | 0.032  | 0.666 | 0.96 |
| hsa-miR-181d-5p   | 13.10   | 0.085  | 0.579 | 0.96 |
| hsa-miR-1843      | 25.29   | -0.041 | 0.700 | 0.96 |
| hsa-miR-185-5p    | 480.24  | -0.144 | 0.167 | 0.96 |
| hsa-miR-186-5p    | 293.01  | -0.101 | 0.330 | 0.96 |
| hsa-miR-1908-5p   | 39.87   | -0.083 | 0.565 | 0.96 |
| hsa-miR-15b-3p    | 19.26   | -0.136 | 0.383 | 0.96 |
| hsa-miR-192-5p    | 372.46  | -0.085 | 0.611 | 0.96 |
| hsa-miR-181a-5p   | 538.68  | -0.056 | 0.496 | 0.96 |
| hsa-miR-194-5p    | 157.00  | 0.068  | 0.638 | 0.96 |
| hsa-miR-197-3p    | 49.58   | -0.082 | 0.534 | 0.96 |
| hsa-miR-19b-3p    | 37.48   | -0.086 | 0.567 | 0.96 |
| hsa-miR-200c-3p   | 30.86   | 0.597  | 0.019 | 0.96 |
| hsa-miR-17-5p     | 122.06  | -0.115 | 0.189 | 0.96 |
| hsa-miR-203a-3p   | 212.98  | 0.636  | 0.020 | 0.96 |
| hsa-miR-206       | 23.70   | -0.225 | 0.397 | 0.96 |
| hsa-miR-16-5p     | 518.60  | -0.114 | 0.428 | 0.96 |
| hsa-miR-20a-5p    | 194.05  | -0.162 | 0.109 | 0.96 |
| hsa-miR-16-2-3p   | 687.23  | -0.126 | 0.326 | 0.96 |
| hsa-miR-20b-5p    | 23.66   | -0.199 | 0.217 | 0.96 |
| hsa-miR-21-5p     | 6737.31 | 0.114  | 0.125 | 0.96 |
| hsa-miR-2110      | 62.74   | -0.135 | 0.159 | 0.96 |
| hsa-miR-183-5p    | 130.69  | -0.064 | 0.675 | 0.96 |
| hsa-miR-182-5p    | 191.27  | -0.074 | 0.596 | 0.96 |
| hsa-miR-409-3p    | 439.35  | -0.071 | 0.735 | 0.96 |
| hsa-miR-152-3p    | 69.76   | 0.034  | 0.747 | 0.97 |
| hsa-miR-150-3p    | 23.20   | -0.061 | 0.746 | 0.97 |
| hsa-miR-130a-3p   | 12.92   | 0.043  | 0.774 | 0.97 |
| hsa-miR-340-3p    | 44.76   | 0.044  | 0.775 | 0.97 |
| hsa-miR-193a-5p   | 89.26   | -0.046 | 0.770 | 0.97 |
| hsa-miR-484       | 384.77  | -0.027 | 0.772 | 0.97 |
| hsa-miR-30a-3p    | 28.21   | 0.035  | 0.771 | 0.97 |
| hsa-miR-181a-2-3p | 15.74   | -0.030 | 0.791 | 0.98 |
| hsa-miR-7704      | 19.37   | -0.065 | 0.782 | 0.98 |
| hsa-miR-589-5p    | 12.10   | -0.040 | 0.789 | 0.98 |
| hsa-miR-199a-3p   | 194.99  | -0.024 | 0.804 | 0.98 |
| hsa-miR-146a-5p   | 1248.55 | 0.021  | 0.810 | 0.98 |
| hsa-miR-338-5p    | 20.65   | -0.040 | 0.809 | 0.98 |
| hsa-miR-760       | 20.68   | 0.033  | 0.813 | 0.98 |
| hsa-miR-664a-5p   | 21.45   | 0.026  | 0.832 | 0.98 |
| hsa-miR-379-5p    | 56.62   | 0.051  | 0.820 | 0.98 |
| hsa-miR-22-3p     | 1734.89 | -0.019 | 0.841 | 0.98 |
| hsa-miR-485-3p    | 21.86   | -0.057 | 0.827 | 0.98 |
| hsa-miR-30a-5p    | 169.15  | 0.023  | 0.839 | 0.98 |
| hsa-miR-1246      | 508.63  | -0.033 | 0.834 | 0.98 |
| hsa-miR-7706      | 20.11   | 0.029  | 0.862 | 0.99 |
| hsa-miR-128-3p    | 1199.82 | -0.012 | 0.863 | 0.99 |

|                         |          |         |       |      |
|-------------------------|----------|---------|-------|------|
| <b>hsa-miR-151a-3p</b>  | 3782.82  | 0.016   | 0.861 | 0.99 |
| <b>hsa-miR-1273h-3p</b> | 17.24    | -0.026  | 0.868 | 0.99 |
| <b>hsa-miR-744-5p</b>   | 367.70   | -0.005  | 0.962 | 0.99 |
| <b>hsa-let-7d-3p</b>    | 624.70   | 0.007   | 0.944 | 0.99 |
| <b>hsa-let-7i-5p</b>    | 11247.66 | -0.009  | 0.899 | 0.99 |
| <b>hsa-miR-1-3p</b>     | 465.67   | -0.174  | 0.888 | 0.99 |
| <b>hsa-miR-199a-5p</b>  | 218.23   | 0.018   | 0.900 | 0.99 |
| <b>hsa-miR-134-5p</b>   | 89.07    | 0.017   | 0.934 | 0.99 |
| <b>hsa-miR-493-5p</b>   | 20.59    | -0.015  | 0.952 | 0.99 |
| <b>hsa-miR-323a-3p</b>  | 14.81    | 0.029   | 0.905 | 0.99 |
| <b>hsa-miR-320c</b>     | 150.00   | 0.017   | 0.881 | 0.99 |
| <b>hsa-miR-543</b>      | 148.91   | -0.025  | 0.896 | 0.99 |
| <b>hsa-miR-27b-3p</b>   | 1024.36  | 0.004   | 0.953 | 0.99 |
| <b>hsa-miR-381-3p</b>   | 50.61    | -0.022  | 0.916 | 0.99 |
| <b>hsa-miR-29a-3p</b>   | 114.08   | 0.009   | 0.943 | 0.99 |
| <b>hsa-miR-181b-5p</b>  | 52.17    | 0.008   | 0.945 | 0.99 |
| <b>hsa-miR-1180-3p</b>  | 94.29    | -0.009  | 0.956 | 0.99 |
| <b>hsa-miR-584-5p</b>   | 282.55   | -0.009  | 0.925 | 0.99 |
| <b>hsa-miR-328-3p</b>   | 275.39   | 0.005   | 0.960 | 0.99 |
| <b>hsa-miR-30d-5p</b>   | 4600.44  | 0.003   | 0.947 | 0.99 |
| <b>hsa-miR-424-3p</b>   | 46.42    | 0.011   | 0.924 | 0.99 |
| <b>hsa-miR-19a-3p</b>   | 15.36    | -0.005  | 0.977 | 1.00 |
| <b>hsa-miR-23b-3p</b>   | 44.68    | -0.005  | 0.970 | 1.00 |
| <b>hsa-miR-143-3p</b>   | 541.09   | -0.005  | 0.973 | 1.00 |
| <b>hsa-miR-127-3p</b>   | 76.87    | -0.001  | 0.998 | 1.00 |
| <b>hsa-miR-374a-5p</b>  | 30.44    | -0.002  | 0.990 | 1.00 |
| <b>hsa-miR-576-3p</b>   | 16.32    | -0.0002 | 0.998 | 1.00 |
| <b>hsa-miR-15b-5p</b>   | 49.49    | 0.003   | 0.987 | 1.00 |



**Supplementary Table S4.** Differentially expressed miRNAs between 20 pre-diagnostic MPM cases and 20 matched controls from NGS. Table shows the average expression for all identified miRNAs (base Mean), the differential expression reported as log2 fold change between cases and controls (Log2FC), the p-value from statistical analysis (p-value) and the p-value adjusted for multiple testing by FDR (padj). miRNAs investigated for validation are denoted in bold.

| ID                     | baseMean       | log2FoldChange | p-value     | FDR <sup>a</sup> |
|------------------------|----------------|----------------|-------------|------------------|
| <b>hsa-miR-11400</b>   | <b>33.60</b>   | <b>1.35</b>    | <b>0.00</b> | <b>0.01</b>      |
| hsa-miR-361-3p         | 91.52          | 0.42           | 0.00        | 0.09             |
| <b>hsa-miR-148a-3p</b> | <b>7287.60</b> | <b>0.61</b>    | <b>0.00</b> | <b>0.09</b>      |
| hsa-miR-671-3p         | 31.15          | 0.63           | 0.01        | 0.19             |
| hsa-miR-139-3p         | 41.24          | 0.49           | 0.00        | 0.19             |
| hsa-miR-151a-3p        | 3669.19        | 0.43           | 0.00        | 0.19             |
| hsa-miR-107            | 93.16          | -0.36          | 0.01        | 0.23             |
| hsa-miR-584-5p         | 270.28         | 0.39           | 0.01        | 0.24             |
| hsa-miR-744-5p         | 337.03         | 0.42           | 0.01        | 0.24             |
| <b>hsa-miR-4508</b>    | <b>194.01</b>  | <b>-0.72</b>   | <b>0.01</b> | <b>0.24</b>      |
| hsa-miR-4446-3p        | 26.94          | 0.61           | 0.01        | 0.24             |
| hsa-miR-152-3p         | 71.68          | 0.36           | 0.01        | 0.24             |
| hsa-miR-363-3p         | 334.43         | -0.32          | 0.02        | 0.29             |
| hsa-miR-340-3p         | 43.00          | 0.53           | 0.03        | 0.30             |
| hsa-miR-505-5p         | 21.16          | -0.35          | 0.03        | 0.30             |
| hsa-miR-576-3p         | 14.32          | -0.46          | 0.02        | 0.30             |
| hsa-miR-3613-5p        | 33.56          | -0.51          | 0.03        | 0.30             |
| hsa-miR-30e-3p         | 138.17         | 0.33           | 0.03        | 0.30             |
| hsa-miR-144-3p         | 157.88         | -0.40          | 0.03        | 0.30             |
| hsa-miR-1908-5p        | 39.12          | 0.56           | 0.03        | 0.30             |
| hsa-miR-142-5p         | 1268.35        | -0.33          | 0.03        | 0.30             |
| hsa-miR-16-2-3p        | 585.25         | -0.35          | 0.02        | 0.30             |
| hsa-miR-223-5p         | 446.51         | 0.36           | 0.03        | 0.30             |
| hsa-miR-30d-5p         | 4309.93        | 0.14           | 0.03        | 0.30             |
| hsa-miR-186-5p         | 249.03         | -0.31          | 0.04        | 0.31             |
| hsa-miR-150-5p         | 154.68         | -0.46          | 0.04        | 0.31             |
| hsa-miR-15b-5p         | 45.01          | -0.48          | 0.04        | 0.31             |
| hsa-miR-130b-5p        | 33.33          | 0.45           | 0.04        | 0.31             |
| hsa-miR-23a-3p         | 69.97          | 0.36           | 0.04        | 0.31             |
| <b>hsa-miR-409-3p</b>  | <b>475.07</b>  | <b>0.67</b>    | <b>0.04</b> | <b>0.31</b>      |
| hsa-miR-6842-3p        | 18.40          | 0.46           | 0.04        | 0.31             |
| hsa-miR-128-3p         | 1147.03        | 0.21           | 0.05        | 0.31             |
| hsa-miR-433-3p         | 23.27          | 0.70           | 0.05        | 0.31             |
| hsa-miR-379-5p         | 68.61          | 0.71           | 0.05        | 0.31             |
| hsa-miR-1843           | 24.13          | 0.37           | 0.06        | 0.32             |
| hsa-miR-493-5p         | 25.62          | 0.76           | 0.05        | 0.32             |
| hsa-miR-1180-3p        | 79.86          | -0.40          | 0.06        | 0.32             |
| hsa-miR-20a-5p         | 166.86         | -0.27          | 0.06        | 0.34             |
| hsa-miR-1273h-3p       | 17.25          | 0.46           | 0.06        | 0.34             |
| hsa-miR-223-3p         | 94.66          | 0.29           | 0.07        | 0.35             |

| ID              | baseMean | log2FoldChange | p-value | FDR <sup>a</sup> |
|-----------------|----------|----------------|---------|------------------|
| hsa-miR-222-3p  | 278.25   | 0.17           | 0.07    | 0.35             |
| hsa-miR-122-5p  | 18547.91 | 0.60           | 0.07    | 0.36             |
| hsa-miR-330-3p  | 59.75    | 0.34           | 0.08    | 0.39             |
| hsa-miR-502-3p  | 12.62    | -0.45          | 0.10    | 0.39             |
| hsa-miR-148b-3p | 324.52   | 0.23           | 0.08    | 0.39             |
| hsa-miR-370-3p  | 88.88    | 0.53           | 0.09    | 0.39             |
| hsa-miR-485-5p  | 37.96    | 0.57           | 0.08    | 0.39             |
| hsa-miR-335-3p  | 21.84    | 0.42           | 0.10    | 0.39             |
| hsa-miR-15a-5p  | 13.35    | -0.51          | 0.09    | 0.39             |
| hsa-miR-30e-5p  | 841.81   | -0.21          | 0.09    | 0.39             |
| hsa-miR-493-3p  | 28.98    | 0.66           | 0.09    | 0.39             |
| hsa-miR-30c-5p  | 330.70   | 0.21           | 0.09    | 0.39             |
| hsa-miR-221-3p  | 377.15   | 0.19           | 0.10    | 0.39             |
| hsa-miR-106b-5p | 35.12    | -0.39          | 0.10    | 0.39             |
| hsa-miR-144-5p  | 72.05    | -0.34          | 0.11    | 0.40             |
| hsa-miR-654-3p  | 29.29    | 0.51           | 0.10    | 0.40             |
| hsa-miR-16-5p   | 456.04   | -0.33          | 0.11    | 0.40             |
| hsa-miR-323a-3p | 15.49    | 0.69           | 0.11    | 0.40             |
| hsa-miR-501-3p  | 71.36    | -0.32          | 0.11    | 0.41             |
| hsa-miR-4732-3p | 33.33    | -0.39          | 0.12    | 0.41             |
| hsa-miR-382-5p  | 76.12    | 0.49           | 0.12    | 0.41             |
| hsa-miR-423-3p  | 1681.47  | 0.17           | 0.12    | 0.41             |
| hsa-let-7i-5p   | 10754.75 | 0.16           | 0.13    | 0.42             |
| hsa-miR-328-3p  | 261.94   | 0.25           | 0.13    | 0.43             |
| hsa-miR-432-5p  | 59.49    | 0.51           | 0.14    | 0.44             |
| hsa-miR-98-5p   | 194.93   | 0.28           | 0.14    | 0.45             |
| hsa-miR-194-5p  | 146.29   | -0.28          | 0.16    | 0.45             |
| hsa-miR-197-3p  | 41.56    | 0.25           | 0.16    | 0.45             |
| hsa-miR-339-3p  | 21.04    | -0.24          | 0.15    | 0.45             |
| hsa-miR-2110    | 51.83    | 0.19           | 0.14    | 0.45             |
| hsa-miR-24-3p   | 1626.25  | 0.14           | 0.15    | 0.45             |
| hsa-miR-28-3p   | 232.08   | 0.18           | 0.16    | 0.45             |
| hsa-miR-381-3p  | 52.41    | 0.48           | 0.16    | 0.45             |
| hsa-miR-378a-3p | 432.30   | 0.23           | 0.16    | 0.45             |
| hsa-miR-323b-3p | 34.39    | 0.51           | 0.16    | 0.45             |
| hsa-miR-23b-3p  | 39.88    | 0.26           | 0.17    | 0.47             |
| hsa-miR-126-3p  | 7402.44  | 0.17           | 0.17    | 0.48             |
| hsa-miR-26b-5p  | 588.51   | -0.17          | 0.18    | 0.49             |
| hsa-miR-20b-5p  | 20.25    | -0.31          | 0.18    | 0.49             |
| hsa-miR-375-3p  | 156.71   | 0.40           | 0.20    | 0.52             |
| hsa-miR-628-3p  | 17.67    | 0.27           | 0.21    | 0.53             |
| hsa-miR-1301-3p | 64.02    | 0.25           | 0.21    | 0.53             |
| hsa-miR-4488    | 18.00    | -0.40          | 0.21    | 0.53             |
| hsa-miR-224-5p  | 80.78    | 0.34           | 0.21    | 0.53             |
| hsa-miR-22-5p   | 73.85    | 0.26           | 0.22    | 0.53             |
| hsa-miR-425-3p  | 13.54    | 0.23           | 0.22    | 0.53             |

| ID              | baseMean | log2FoldChange | p-value | FDR <sup>a</sup> |
|-----------------|----------|----------------|---------|------------------|
| hsa-miR-654-5p  | 15.71    | 0.46           | 0.22    | 0.54             |
| hsa-miR-93-5p   | 156.44   | -0.17          | 0.23    | 0.55             |
| hsa-miR-486-5p  | 42289.42 | -0.23          | 0.26    | 0.57             |
| hsa-miR-7704    | 17.85    | -0.36          | 0.24    | 0.57             |
| hsa-let-7f-5p   | 5440.84  | 0.16           | 0.25    | 0.57             |
| hsa-miR-664a-5p | 20.36    | 0.20           | 0.26    | 0.57             |
| hsa-miR-101-3p  | 1199.58  | -0.21          | 0.25    | 0.57             |
| hsa-miR-106b-3p | 171.05   | 0.13           | 0.25    | 0.57             |
| hsa-miR-451a    | 38231.09 | -0.27          | 0.26    | 0.57             |
| hsa-miR-10a-5p  | 1117.19  | 0.21           | 0.26    | 0.57             |
| hsa-miR-127-3p  | 100.09   | 0.44           | 0.24    | 0.57             |
| hsa-miR-134-5p  | 95.53    | 0.36           | 0.25    | 0.57             |
| hsa-let-7a-3p   | 43.29    | -0.15          | 0.28    | 0.58             |
| hsa-miR-340-5p  | 112.61   | 0.15           | 0.27    | 0.58             |
| hsa-miR-199a-3p | 192.25   | 0.18           | 0.27    | 0.58             |
| hsa-miR-155-5p  | 51.69    | -0.19          | 0.28    | 0.58             |
| hsa-miR-625-3p  | 138.96   | 0.25           | 0.29    | 0.58             |
| hsa-miR-125a-5p | 335.82   | -0.16          | 0.29    | 0.58             |
| hsa-miR-206     | 27.07    | 0.42           | 0.29    | 0.58             |
| hsa-miR-543     | 155.62   | 0.29           | 0.33    | 0.60             |
| hsa-let-7a-5p   | 4633.63  | 0.10           | 0.32    | 0.60             |
| hsa-miR-532-5p  | 256.93   | -0.13          | 0.33    | 0.60             |
| hsa-let-7e-5p   | 113.00   | 0.21           | 0.32    | 0.60             |
| hsa-miR-130a-3p | 11.11    | 0.28           | 0.32    | 0.60             |
| hsa-miR-342-3p  | 25.91    | -0.22          | 0.30    | 0.60             |
| hsa-miR-126-5p  | 126.19   | -0.15          | 0.31    | 0.60             |
| hsa-miR-199a-5p | 208.53   | 0.21           | 0.32    | 0.60             |
| hsa-miR-143-3p  | 498.08   | 0.17           | 0.31    | 0.60             |
| hsa-miR-495-3p  | 20.19    | 0.35           | 0.33    | 0.61             |
| hsa-miR-19b-3p  | 33.81    | -0.25          | 0.34    | 0.61             |
| hsa-miR-4732-5p | 39.45    | -0.23          | 0.34    | 0.61             |
| hsa-miR-589-5p  | 11.80    | 0.26           | 0.34    | 0.61             |
| hsa-miR-21-5p   | 6734.84  | 0.11           | 0.34    | 0.61             |
| hsa-miR-193a-5p | 84.19    | 0.22           | 0.36    | 0.63             |
| hsa-miR-26a-5p  | 9981.66  | 0.14           | 0.36    | 0.63             |
| hsa-miR-19a-3p  | 16.17    | -0.25          | 0.37    | 0.63             |
| hsa-miR-145-3p  | 29.16    | 0.23           | 0.37    | 0.63             |
| hsa-miR-942-5p  | 15.09    | -0.20          | 0.37    | 0.63             |
| hsa-miR-146a-5p | 1173.34  | 0.13           | 0.37    | 0.63             |
| hsa-miR-4497    | 30.47    | -0.25          | 0.39    | 0.64             |
| hsa-miR-425-5p  | 234.96   | -0.10          | 0.39    | 0.64             |
| hsa-miR-511-5p  | 22.47    | 0.28           | 0.39    | 0.64             |
| hsa-miR-99a-5p  | 1691.55  | 0.20           | 0.39    | 0.64             |
| hsa-miR-99b-5p  | 397.93   | 0.12           | 0.39    | 0.64             |
| hsa-miR-92b-3p  | 86.43    | -0.12          | 0.40    | 0.64             |
| hsa-miR-424-3p  | 42.76    | -0.14          | 0.40    | 0.64             |

| ID                | baseMean | log2FoldChange | p-value | FDR <sup>a</sup> |
|-------------------|----------|----------------|---------|------------------|
| hsa-miR-652-3p    | 24.28    | -0.17          | 0.41    | 0.65             |
| hsa-miR-185-5p    | 392.59   | -0.13          | 0.42    | 0.66             |
| hsa-miR-27b-3p    | 1012.14  | 0.11           | 0.43    | 0.67             |
| hsa-miR-151a-5p   | 21.75    | 0.23           | 0.43    | 0.67             |
| hsa-miR-485-3p    | 23.56    | 0.28           | 0.44    | 0.68             |
| hsa-miR-4433b-3p  | 55.55    | 0.35           | 0.46    | 0.71             |
| hsa-miR-339-5p    | 26.41    | 0.16           | 0.47    | 0.71             |
| hsa-miR-629-5p    | 162.93   | -0.12          | 0.47    | 0.71             |
| hsa-miR-181a-2-3p | 16.21    | 0.13           | 0.51    | 0.71             |
| hsa-miR-181a-5p   | 516.08   | -0.07          | 0.52    | 0.71             |
| hsa-miR-139-5p    | 188.41   | 0.10           | 0.48    | 0.71             |
| hsa-miR-1307-3p   | 432.02   | 0.09           | 0.48    | 0.71             |
| hsa-miR-22-3p     | 1624.64  | -0.10          | 0.50    | 0.71             |
| hsa-miR-1228-5p   | 30.99    | 0.23           | 0.51    | 0.71             |
| hsa-miR-142-3p    | 143.38   | -0.10          | 0.50    | 0.71             |
| hsa-miR-140-3p    | 571.04   | 0.08           | 0.52    | 0.71             |
| hsa-miR-484       | 328.63   | -0.08          | 0.52    | 0.71             |
| hsa-miR-941       | 67.25    | 0.10           | 0.52    | 0.71             |
| hsa-miR-100-5p    | 251.30   | -0.20          | 0.49    | 0.71             |
| hsa-miR-342-5p    | 99.90    | -0.13          | 0.48    | 0.71             |
| hsa-miR-361-5p    | 17.05    | 0.13           | 0.52    | 0.71             |
| hsa-let-7g-5p     | 2365.49  | -0.06          | 0.52    | 0.71             |
| hsa-miR-29a-3p    | 115.96   | -0.14          | 0.49    | 0.71             |
| hsa-miR-3158-3p   | 28.10    | 0.18           | 0.50    | 0.71             |
| hsa-miR-760       | 19.52    | 0.11           | 0.53    | 0.71             |
| hsa-miR-378c      | 77.71    | -0.11          | 0.53    | 0.71             |
| hsa-miR-320b      | 1009.68  | -0.09          | 0.55    | 0.73             |
| hsa-miR-28-5p     | 28.77    | -0.13          | 0.56    | 0.74             |
| hsa-miR-483-5p    | 49.10    | 0.17           | 0.59    | 0.78             |
| hsa-miR-92a-3p    | 11188.77 | -0.07          | 0.62    | 0.80             |
| hsa-miR-182-5p    | 171.03   | 0.10           | 0.63    | 0.82             |
| hsa-miR-1246      | 467.43   | 0.10           | 0.65    | 0.83             |
| hsa-miR-25-3p     | 3017.87  | -0.07          | 0.65    | 0.83             |
| hsa-miR-103a-3p   | 326.05   | 0.05           | 0.65    | 0.83             |
| hsa-let-7c-5p     | 661.96   | -0.05          | 0.66    | 0.84             |
| hsa-miR-140-5p    | 41.62    | -0.07          | 0.67    | 0.84             |
| hsa-miR-1-3p      | 241.39   | -0.13          | 0.68    | 0.84             |
| hsa-miR-215-5p    | 47.90    | -0.09          | 0.68    | 0.84             |
| hsa-miR-345-5p    | 16.36    | 0.09           | 0.69    | 0.85             |
| hsa-miR-27a-5p    | 12.17    | 0.11           | 0.69    | 0.85             |
| hsa-miR-181d-5p   | 12.38    | -0.09          | 0.72    | 0.86             |
| hsa-miR-191-5p    | 1250.05  | 0.04           | 0.71    | 0.86             |
| hsa-let-7b-5p     | 8648.82  | 0.06           | 0.71    | 0.86             |
| hsa-miR-4516      | 28.86    | -0.11          | 0.72    | 0.86             |
| hsa-miR-15b-3p    | 16.33    | -0.08          | 0.72    | 0.86             |
| hsa-miR-203a-3p   | 344.32   | -0.12          | 0.79    | 0.93             |

| <b>ID</b>        | <b>baseMean</b> | <b>log2FoldChange</b> | <b>p-value</b> | <b>FDR<sup>a</sup></b> |
|------------------|-----------------|-----------------------|----------------|------------------------|
| hsa-miR-4443     | 106.52          | 0.07                  | 0.79           | 0.93                   |
| hsa-miR-30a-3p   | 28.86           | -0.05                 | 0.81           | 0.95                   |
| hsa-miR-181b-5p  | 55.57           | -0.04                 | 0.83           | 0.97                   |
| hsa-miR-192-5p   | 295.15          | -0.03                 | 0.83           | 0.97                   |
| hsa-miR-200c-3p  | 17.35           | -0.04                 | 0.84           | 0.97                   |
| hsa-miR-320d     | 57.11           | 0.05                  | 0.84           | 0.97                   |
| hsa-miR-4433b-5p | 83.24           | 0.05                  | 0.85           | 0.97                   |
| hsa-miR-550a-5p  | 10.24           | -0.05                 | 0.86           | 0.97                   |
| hsa-miR-24-2-5p  | 20.39           | 0.03                  | 0.86           | 0.97                   |
| hsa-miR-3615     | 517.34          | -0.03                 | 0.87           | 0.98                   |
| hsa-let-7d-5p    | 649.43          | 0.01                  | 0.92           | 0.99                   |
| hsa-let-7d-3p    | 598.68          | 0.01                  | 0.92           | 0.99                   |
| hsa-let-7b-3p    | 12.73           | -0.03                 | 0.92           | 0.99                   |
| hsa-miR-32-5p    | 25.52           | -0.01                 | 0.94           | 0.99                   |
| hsa-miR-7-5p     | 229.50          | 0.01                  | 0.94           | 0.99                   |
| hsa-miR-320a-3p  | 3948.70         | -0.01                 | 0.92           | 0.99                   |
| hsa-miR-320c     | 153.77          | -0.01                 | 0.97           | 0.99                   |
| hsa-miR-7706     | 17.62           | 0.02                  | 0.95           | 0.99                   |
| hsa-miR-30b-5p   | 16.47           | 0.02                  | 0.92           | 0.99                   |
| hsa-miR-335-5p   | 19.16           | 0.01                  | 0.96           | 0.99                   |
| hsa-miR-374b-5p  | 13.63           | 0.01                  | 0.98           | 0.99                   |
| hsa-miR-30a-5p   | 172.51          | -0.01                 | 0.98           | 0.99                   |
| hsa-miR-10b-5p   | 1964.83         | 0.01                  | 0.97           | 0.99                   |
| hsa-miR-338-5p   | 19.03           | 0.01                  | 0.97           | 0.99                   |
| hsa-miR-423-5p   | 12999.68        | 0.01                  | 0.97           | 0.99                   |
| hsa-miR-125b-5p  | 112.46          | -0.01                 | 0.96           | 0.99                   |
| hsa-miR-150-3p   | 21.82           | -0.03                 | 0.92           | 0.99                   |
| hsa-miR-17-5p    | 107.51          | -0.01                 | 0.97           | 0.99                   |
| hsa-miR-183-5p   | 112.04          | 0.03                  | 0.90           | 0.99                   |
| hsa-miR-486-3p   | 126.47          | -0.02                 | 0.91           | 0.99                   |
| hsa-miR-374a-5p  | 31.06           | 0.02                  | 0.95           | 0.99                   |
| hsa-miR-27a-3p   | 988.26          | 0.00                  | 0.99           | 0.99                   |
| hsa-miR-146b-5p  | 650.36          | 0.00                  | 1.00           | 1.00                   |

<sup>a</sup>adjustment for multiple testing by false discovery rate

**Supplementary Table S5.** Validated miRNA-target interaction results from MultiMiR Bioconductor's package.

| mature_mirna_acc | mature_mirna_id | target_symbol | target_entrez | target_ensembl  | mirecords | mirtarbase | tarbase | validated.sum |
|------------------|-----------------|---------------|---------------|-----------------|-----------|------------|---------|---------------|
| MIMAT0000243     | hsa-miR-148a-3p | DNMT1         | 1786          | ENSG00000130816 | 2         | 7          | 1       | 3             |
| MIMAT0000243     | hsa-miR-148a-3p | ACVR1         | 90            | ENSG00000115170 | 0         | 2          | 1       | 2             |
| MIMAT0000243     | hsa-miR-148a-3p | AGO2          | 27161         | ENSG00000123908 | 0         | 2          | 1       | 2             |
| MIMAT0000243     | hsa-miR-148a-3p | ALCAM         | 214           | ENSG00000170017 | 0         | 1          | 1       | 2             |
| MIMAT0000243     | hsa-miR-148a-3p | ANP32A        | 8125          | ENSG00000140350 | 0         | 1          | 1       | 2             |
| MIMAT0000243     | hsa-miR-148a-3p | APC           | 324           | ENSG00000134982 | 0         | 1          | 1       | 2             |
| MIMAT0000243     | hsa-miR-148a-3p | APLP2         | 334           | ENSG00000084234 | 0         | 1          | 1       | 2             |
| MIMAT0000243     | hsa-miR-148a-3p | APPBP2        | 10513         | ENSG00000062725 | 0         | 1          | 1       | 2             |
| MIMAT0000243     | hsa-miR-148a-3p | ARID3A        | 1820          | ENSG00000116017 | 0         | 1          | 1       | 2             |
| MIMAT0000243     | hsa-miR-148a-3p | ARL6IP1       | 23204         | ENSG00000170540 | 0         | 1          | 1       | 2             |
| MIMAT0000243     | hsa-miR-148a-3p | ARL8B         | 55207         | ENSG00000134108 | 0         | 1          | 1       | 2             |
| MIMAT0000243     | hsa-miR-148a-3p | ARRDC3        | 57561         | ENSG00000113369 | 0         | 1          | 1       | 2             |
| MIMAT0000243     | hsa-miR-148a-3p | AURKB         | 9212          | ENSG00000178999 | 0         | 1          | 1       | 2             |
| MIMAT0000243     | hsa-miR-148a-3p | BAZ2B         | 29994         | ENSG00000123636 | 0         | 1          | 1       | 2             |
| MIMAT0000243     | hsa-miR-148a-3p | BCL2L11       | 10018         | ENSG00000153094 | 0         | 1          | 1       | 2             |
| MIMAT0000243     | hsa-miR-148a-3p | BTBD3         | 22903         | ENSG00000132640 | 0         | 7          | 1       | 2             |
| MIMAT0000243     | hsa-miR-148a-3p | CBX3          | 11335         | ENSG00000122565 | 0         | 1          | 1       | 2             |
| MIMAT0000243     | hsa-miR-148a-3p | CCKBR         | 887           | ENSG00000110148 | 0         | 4          | 1       | 2             |
| MIMAT0000243     | hsa-miR-148a-3p | CCNA2         | 890           | ENSG00000145386 | 0         | 3          | 1       | 2             |
| MIMAT0000243     | hsa-miR-148a-3p | CCNI          | 10983         | ENSG00000118816 | 0         | 1          | 1       | 2             |
| MIMAT0000243     | hsa-miR-148a-3p | CCT6A         | 908           | ENSG00000146731 | 0         | 1          | 1       | 2             |
| MIMAT0000243     | hsa-miR-148a-3p | CDC25B        | 994           | ENSG00000101224 | 0         | 1          | 1       | 2             |
| MIMAT0000243     | hsa-miR-148a-3p | CDK19         | 23097         | ENSG00000155111 | 0         | 2          | 1       | 2             |
| MIMAT0000243     | hsa-miR-148a-3p | CDKN1A        | 1026          | ENSG00000124762 | 0         | 1          | 1       | 2             |
| MIMAT0000243     | hsa-miR-148a-3p | CDKN1B        | 1027          | ENSG00000111276 | 0         | 4          | 1       | 2             |
| MIMAT0000243     | hsa-miR-148a-3p | CEBPG         | 1054          | ENSG00000153879 | 0         | 1          | 1       | 2             |
| MIMAT0000243     | hsa-miR-148a-3p | CNOT4         | 4850          | ENSG00000080802 | 0         | 4          | 1       | 2             |
| MIMAT0000243     | hsa-miR-148a-3p | DDX6          | 1656          | ENSG00000110367 | 0         | 2          | 1       | 2             |
| MIMAT0000243     | hsa-miR-148a-3p | DICER1        | 23405         | ENSG00000100697 | 0         | 2          | 1       | 2             |

|              |                 |          |        |                 |   |   |   |   |
|--------------|-----------------|----------|--------|-----------------|---|---|---|---|
| MIMAT0000243 | hsa-miR-148a-3p | DNMT3B   | 1789   | ENSG00000088305 | 4 | 2 | 0 | 2 |
| MIMAT0000243 | hsa-miR-148a-3p | DSTYK    | 25778  | ENSG00000133059 | 0 | 1 | 1 | 2 |
| MIMAT0000243 | hsa-miR-148a-3p | DYNLL2   | 140735 | ENSG00000264364 | 0 | 1 | 1 | 2 |
| MIMAT0000243 | hsa-miR-148a-3p | DYRK1A   | 1859   | ENSG00000157540 | 0 | 1 | 1 | 2 |
| MIMAT0000243 | hsa-miR-148a-3p | EOGT     | 285203 | ENSG00000163378 | 0 | 3 | 1 | 2 |
| MIMAT0000243 | hsa-miR-148a-3p | ERRFI1   | 54206  | ENSG00000116285 | 0 | 1 | 1 | 2 |
| MIMAT0000243 | hsa-miR-148a-3p | FAM104A  | 84923  | ENSG00000133193 | 0 | 1 | 1 | 2 |
| MIMAT0000243 | hsa-miR-148a-3p | FURIN    | 5045   | ENSG00000140564 | 0 | 1 | 1 | 2 |
| MIMAT0000243 | hsa-miR-148a-3p | FXR1     | 8087   | ENSG00000114416 | 0 | 1 | 1 | 2 |
| MIMAT0000243 | hsa-miR-148a-3p | GAS1     | 2619   | ENSG00000180447 | 0 | 3 | 1 | 2 |
| MIMAT0000243 | hsa-miR-148a-3p | GLRX5    | 51218  | ENSG00000182512 | 0 | 1 | 1 | 2 |
| MIMAT0000243 | hsa-miR-148a-3p | GPRC5A   | 9052   | ENSG00000013588 | 0 | 2 | 1 | 2 |
| MIMAT0000243 | hsa-miR-148a-3p | HCCS     | 3052   | ENSG00000004961 | 0 | 2 | 1 | 2 |
| MIMAT0000243 | hsa-miR-148a-3p | HLA-A    | 3105   | ENSG00000206503 | 0 | 2 | 1 | 2 |
| MIMAT0000243 | hsa-miR-148a-3p | HLA-C    | 3107   | ENSG00000204525 | 0 | 2 | 1 | 2 |
| MIMAT0000243 | hsa-miR-148a-3p | HMGB1    | 3146   | ENSG00000189403 | 0 | 1 | 1 | 2 |
| MIMAT0000243 | hsa-miR-148a-3p | HSP90AA1 | 3320   | ENSG00000080824 | 0 | 1 | 1 | 2 |
| MIMAT0000243 | hsa-miR-148a-3p | HSP90B1  | 7184   | ENSG00000166598 | 0 | 2 | 1 | 2 |
| MIMAT0000243 | hsa-miR-148a-3p | HSPA4    | 3308   | ENSG00000170606 | 0 | 1 | 1 | 2 |
| MIMAT0000243 | hsa-miR-148a-3p | INO80    | 54617  | ENSG00000128908 | 0 | 1 | 1 | 2 |
| MIMAT0000243 | hsa-miR-148a-3p | IRS1     | 3667   | ENSG00000169047 | 0 | 1 | 1 | 2 |
| MIMAT0000243 | hsa-miR-148a-3p | ITGA5    | 3678   | ENSG00000161638 | 0 | 1 | 1 | 2 |
| MIMAT0000243 | hsa-miR-148a-3p | ITGB8    | 3696   | ENSG00000105855 | 0 | 2 | 1 | 2 |
| MIMAT0000243 | hsa-miR-148a-3p | JARID2   | 3720   | ENSG00000008083 | 0 | 1 | 1 | 2 |
| MIMAT0000243 | hsa-miR-148a-3p | KANSL1   | 284058 | ENSG00000120071 | 0 | 1 | 1 | 2 |
| MIMAT0000243 | hsa-miR-148a-3p | KIF2C    | 11004  | ENSG00000142945 | 0 | 1 | 1 | 2 |
| MIMAT0000243 | hsa-miR-148a-3p | LBR      | 3930   | ENSG00000143815 | 0 | 1 | 1 | 2 |
| MIMAT0000243 | hsa-miR-148a-3p | LDLR     | 3949   | ENSG00000130164 | 0 | 1 | 1 | 2 |
| MIMAT0000243 | hsa-miR-148a-3p | LNPEP    | 4012   | ENSG00000113441 | 0 | 2 | 1 | 2 |
| MIMAT0000243 | hsa-miR-148a-3p | MAP3K9   | 4293   | ENSG00000006432 | 0 | 2 | 1 | 2 |
| MIMAT0000243 | hsa-miR-148a-3p | MRPS27   | 23107  | ENSG00000113048 | 0 | 1 | 1 | 2 |
| MIMAT0000243 | hsa-miR-148a-3p | MYC      | 4609   | ENSG00000136997 | 0 | 1 | 1 | 2 |

|              |                 |           |        |                 |   |   |   |   |
|--------------|-----------------|-----------|--------|-----------------|---|---|---|---|
| MIMAT0000243 | hsa-miR-148a-3p | NPTX1     | 4884   | ENSG00000171246 | 0 | 1 | 1 | 2 |
| MIMAT0000243 | hsa-miR-148a-3p | NR1I2     | 8856   | ENSG00000144852 | 1 | 1 | 0 | 2 |
| MIMAT0000243 | hsa-miR-148a-3p | NRP1      | 8829   | ENSG00000099250 | 0 | 1 | 1 | 2 |
| MIMAT0000243 | hsa-miR-148a-3p | OBI1      | 79596  | ENSG00000152193 | 0 | 1 | 1 | 2 |
| MIMAT0000243 | hsa-miR-148a-3p | OTUD4     | 54726  | ENSG00000164164 | 0 | 1 | 1 | 2 |
| MIMAT0000243 | hsa-miR-148a-3p | PATL1     | 219988 | ENSG00000166889 | 0 | 1 | 1 | 2 |
| MIMAT0000243 | hsa-miR-148a-3p | PBXIP1    | 57326  | ENSG00000163346 | 0 | 2 | 1 | 2 |
| MIMAT0000243 | hsa-miR-148a-3p | PDIA3     | 2923   | ENSG00000167004 | 0 | 1 | 1 | 2 |
| MIMAT0000243 | hsa-miR-148a-3p | PGAP4     | 84302  | ENSG00000165152 | 0 | 1 | 1 | 2 |
| MIMAT0000243 | hsa-miR-148a-3p | PPARD     | 5467   | ENSG00000112033 | 0 | 1 | 1 | 2 |
| MIMAT0000243 | hsa-miR-148a-3p | PPP6R1    | 22870  | ENSG00000105063 | 0 | 2 | 1 | 2 |
| MIMAT0000243 | hsa-miR-148a-3p | PRNP      | 5621   | ENSG00000171867 | 0 | 1 | 1 | 2 |
| MIMAT0000243 | hsa-miR-148a-3p | PTPN23    | 25930  | ENSG00000076201 | 0 | 1 | 1 | 2 |
| MIMAT0000243 | hsa-miR-148a-3p | QKI       | 9444   | ENSG00000112531 | 0 | 1 | 1 | 2 |
| MIMAT0000243 | hsa-miR-148a-3p | RAB10     | 10890  | ENSG00000084733 | 0 | 1 | 1 | 2 |
| MIMAT0000243 | hsa-miR-148a-3p | RAB14     | 51552  | ENSG00000119396 | 0 | 1 | 1 | 2 |
| MIMAT0000243 | hsa-miR-148a-3p | RAB1B     | 81876  | ENSG00000174903 | 0 | 2 | 1 | 2 |
| MIMAT0000243 | hsa-miR-148a-3p | RAB34     | 83871  | ENSG00000109113 | 0 | 2 | 1 | 2 |
| MIMAT0000243 | hsa-miR-148a-3p | RALY      | 22913  | ENSG00000125970 | 0 | 1 | 1 | 2 |
| MIMAT0000243 | hsa-miR-148a-3p | RASSF8    | 11228  | ENSG00000123094 | 0 | 1 | 1 | 2 |
| MIMAT0000243 | hsa-miR-148a-3p | RBM23     | 55147  | ENSG00000100461 | 0 | 1 | 1 | 2 |
| MIMAT0000243 | hsa-miR-148a-3p | RBM38     | 55544  | ENSG00000132819 | 0 | 1 | 1 | 2 |
| MIMAT0000243 | hsa-miR-148a-3p | RCC2      | 55920  | ENSG00000179051 | 0 | 1 | 1 | 2 |
| MIMAT0000243 | hsa-miR-148a-3p | ROCK1     | 6093   | ENSG00000067900 | 0 | 2 | 1 | 2 |
| MIMAT0000243 | hsa-miR-148a-3p | S1PR1     | 1901   | ENSG00000170989 | 0 | 3 | 1 | 2 |
| MIMAT0000243 | hsa-miR-148a-3p | SECISBP2L | 9728   | ENSG00000138593 | 0 | 5 | 1 | 2 |
| MIMAT0000243 | hsa-miR-148a-3p | SERPINE1  | 5054   | ENSG00000106366 | 0 | 1 | 1 | 2 |
| MIMAT0000243 | hsa-miR-148a-3p | SESN3     | 143686 | ENSG00000149212 | 0 | 1 | 1 | 2 |
| MIMAT0000243 | hsa-miR-148a-3p | SESTD1    | 91404  | ENSG00000187231 | 0 | 1 | 1 | 2 |
| MIMAT0000243 | hsa-miR-148a-3p | SIK1      | 150094 | ENSG00000142178 | 0 | 3 | 1 | 2 |
| MIMAT0000243 | hsa-miR-148a-3p | SLC25A3   | 5250   | ENSG00000075415 | 0 | 1 | 1 | 2 |
| MIMAT0000243 | hsa-miR-148a-3p | SLC38A2   | 54407  | ENSG00000134294 | 0 | 2 | 1 | 2 |



|              |                 |         |        |                 |   |   |   |   |
|--------------|-----------------|---------|--------|-----------------|---|---|---|---|
| MIMAT0000243 | hsa-miR-148a-3p | SMAD2   | 4087   | ENSG00000175387 | 0 | 4 | 1 | 2 |
| MIMAT0000243 | hsa-miR-148a-3p | SPRY2   | 10253  | ENSG00000136158 | 0 | 1 | 1 | 2 |
| MIMAT0000243 | hsa-miR-148a-3p | STX6    | 10228  | ENSG00000135823 | 0 | 1 | 1 | 2 |
| MIMAT0000243 | hsa-miR-148a-3p | TGIF2   | 60436  | ENSG00000118707 | 0 | 1 | 1 | 2 |
| MIMAT0000243 | hsa-miR-148a-3p | TMED7   | 51014  | ENSG00000134970 | 0 | 1 | 1 | 2 |
| MIMAT0000243 | hsa-miR-148a-3p | TMEM9B  | 56674  | ENSG00000175348 | 0 | 1 | 1 | 2 |
| MIMAT0000243 | hsa-miR-148a-3p | TNRC6A  | 27327  | ENSG00000090905 | 0 | 2 | 1 | 2 |
| MIMAT0000243 | hsa-miR-148a-3p | TNRC6B  | 23112  | ENSG00000100354 | 0 | 1 | 1 | 2 |
| MIMAT0000243 | hsa-miR-148a-3p | TRIM59  | 286827 | ENSG00000213186 | 0 | 1 | 1 | 2 |
| MIMAT0000243 | hsa-miR-148a-3p | TXNIP   | 10628  | ENSG00000265972 | 0 | 2 | 1 | 2 |
| MIMAT0000243 | hsa-miR-148a-3p | UBE2D3  | 7323   | ENSG00000109332 | 0 | 1 | 1 | 2 |
| MIMAT0000243 | hsa-miR-148a-3p | UQCRQ   | 27089  | ENSG00000164405 | 0 | 1 | 1 | 2 |
| MIMAT0000243 | hsa-miR-148a-3p | VAV2    | 7410   | ENSG00000160293 | 0 | 1 | 1 | 2 |
| MIMAT0000243 | hsa-miR-148a-3p | VPS37A  | 137492 | ENSG00000155975 | 0 | 1 | 1 | 2 |
| MIMAT0000243 | hsa-miR-148a-3p | VPS37B  | 79720  | ENSG00000139722 | 0 | 1 | 1 | 2 |
| MIMAT0000243 | hsa-miR-148a-3p | YWHAB   | 7529   | ENSG00000166913 | 0 | 1 | 1 | 2 |
| MIMAT0000243 | hsa-miR-148a-3p | ZFYVE26 | 23503  | ENSG00000072121 | 0 | 2 | 1 | 2 |
| MIMAT0001639 | hsa-miR-409-3p  | FGB     | 2244   | ENSG00000171564 | 0 | 1 | 1 | 2 |

**Supplementary Table S6.** KEGG pathway enrichment analysis for validated target genes of miR-409-3p and miR-148a.

| nGenes <sup>a</sup> | Enrichment FDR <sup>b</sup> | Pathway Genes | Fold Enrichment <sup>c</sup> | Pathway                                 | Genes                                                                                                                                    |
|---------------------|-----------------------------|---------------|------------------------------|-----------------------------------------|------------------------------------------------------------------------------------------------------------------------------------------|
| 13                  | 1.81E-10                    | 161           | 16.6                         | MicroRNAs in cancer                     | BCL2L11 SPRY2 CDKN1A CDKN1B<br>DNMT1 DNMT3B DICER1 APC IRS1<br>ITGA5 MYC ROCK1 CDC25B<br>CDKN1A CDKN1B SMAD2 MYC HEL-S-1<br>CCNA2 CDC25B |
| 7                   | 0.000207161                 | 124           | 11.6                         | Cell cycle                              | BCL2L11 CDKN1A CDKN1B HEL-S-269                                                                                                          |
| 8                   | 0.00036598                  | 202           | 8.1                          | Epstein-Barr virus infection            | HLA-A HLA-Cw MYC CCNA2<br>BCL2L11 CDKN1A CDKN1B HSP90AA1<br>IRS1 ITGA5 ITGB8 MYC HEL-S-125m<br>HEL-S-1                                   |
| 10                  | 0.000377112                 | 354           | 5.8                          | PI3K-Akt signaling pathway              | CDKN1A HLA-A HLA-Cw SMAD2 MYC<br>SERPINE1 CCNA2                                                                                          |
| 7                   | 0.000377112                 | 156           | 9.2                          | Cellular senescence                     | HEL-S-269 HLA-A HLA-Cw HSPA4<br>HSP90AA1                                                                                                 |
| 5                   | 0.001087109                 | 78            | 13.2                         | Antigen processing and presentation     | BCL2L11 CDKN1A CDKN1B APC<br>HSP90AA1 SMAD2 MYC NR1C2 ROCK1<br>HEL-S-125m CCNA2                                                          |
| 11                  | 0.001304125                 | 530           | 4.3                          | Pathways in cancer                      | BCL2L11 CDKN1A APC SMAD2 MYC                                                                                                             |
| 5                   | 0.001304125                 | 86            | 11.9                         | Colorectal cancer                       | SMAD2 MYC TGIF2 ROCK1 ACVR1<br>CDKN1A HLA-A HLA-Cw SMAD2 MYC<br>NRP1 CCNA2                                                               |
| 5                   | 0.00164067                  | 93            | 11.0                         | TGF-beta signaling pathway              | RAB10 VPS37A HLA-A HLA-Cw LDLR<br>SMAD2 VPS37B                                                                                           |
| 7                   | 0.00164067                  | 219           | 6.6                          | Human T-cell leukemia virus 1 infection | CDKN1A CDKN1B HLA-A HLA-Cw APC<br>ITGA5 ITGB8 CCNA2                                                                                      |
| 7                   | 0.003244572                 | 252           | 5.7                          | Endocytosis                             | BCL2L11 CDKN1A CDKN1B S1PR1 IRS1<br>CDKN1A CDKN1B HLA-A HLA-Cw HEL-S-1<br>CCNA2                                                          |
| 8                   | 0.003244572                 | 331           | 5.0                          | Human papillomavirus infection          | CDKN1A ITGA5 SMAD2 MYC ROCK1<br>VAV2                                                                                                     |
| 5                   | 0.005278394                 | 131           | 7.8                          | FoxO signaling pathway                  |                                                                                                                                          |
| 6                   | 0.005278394                 | 203           | 6.1                          | Viral carcinogenesis                    |                                                                                                                                          |
| 6                   | 0.005278394                 | 202           | 6.1                          | Proteoglycans in cancer                 |                                                                                                                                          |

| nGenes <sup>a</sup> | Enrichment FDR <sup>b</sup> | Pathway Genes | Fold Enrichment <sup>c</sup> | Pathway                                                  | Genes                                                            |
|---------------------|-----------------------------|---------------|------------------------------|----------------------------------------------------------|------------------------------------------------------------------|
| 5                   | 0.006980585                 | 143           | 7.2                          | Signaling pathways regulating pluripotency of stem cells | APC JARID2 SMAD2 MYC ACVR1                                       |
| 6                   | 0.007365432                 | 224           | 5.5                          | Human cytomegalovirus infection                          | CDKN1A HEL-S-269 HLA-A HLA-Cw MYC ROCK1                          |
| 5                   | 0.007365432                 | 148           | 6.9                          | Gastric cancer                                           | CDKN1A CDKN1B APC SMAD2 MYC                                      |
| 5                   | 0.008943497                 | 157           | 6.5                          | Hippo signaling pathway                                  | APC SMAD2 MYC SERPINE1 HEL-S-1 CDKN1A CDKN1B HSP90AA1 HEL-S-125m |
| 4                   | 0.010681789                 | 97            | 8.5                          | Prostate cancer                                          | RAB10 IRS1 RAB14 CCNA2                                           |
| 4                   | 0.021272746                 | 120           | 6.8                          | AMPK signaling pathway                                   | CDKN1A APC MYC                                                   |
| 3                   | 0.021272746                 | 58            | 10.6                         | Endometrial cancer                                       | APC ITGA5 ITGB8 ROCK1 VAV2                                       |
| 5                   | 0.028158182                 | 217           | 4.7                          | Regulation of actin cytoskeleton                         | MYC NR1C2 CCNA2                                                  |
| 3                   | 0.028158182                 | 67            | 9.2                          | Acute myeloid leukemia                                   | HSPA4 HSP90AA1 LDLR HEL-S-125m VAV2                              |
| 5                   | 0.028158182                 | 214           | 4.8                          | Lipid and atherosclerosis                                | CDKN1A SESN3 SERPINE1                                            |
| 3                   | 0.034419624                 | 73            | 8.4                          | P53 signaling pathway                                    | ALCAM HLA-A HLA-Cw ITGB8                                         |
| 4                   | 0.035815824                 | 149           | 5.5                          | Cell adhesion molecules                                  | CDKN1A CDKN1B MYC                                                |
| 3                   | 0.035815824                 | 76            | 8.1                          | Chronic myeloid leukemia                                 | DDX6 PATL1 CNOT4                                                 |
| 3                   | 0.038350195                 | 79            | 7.8                          | RNA degradation                                          | CDKN1A CDKN1B APC LDLR                                           |
| 4                   | 0.038350195                 | 155           | 5.3                          | Cushing syndrome                                         | DYNLL2 HSP90AA1 MYC ARL8B HEL-S-125m                             |
| 5                   | 0.038409225                 | 249           | 4.1                          | Salmonella infection                                     | CDKN1A LDLR MYC HEL-S-1                                          |
| 4                   | 0.038409225                 | 157           | 5.2                          | Hepatitis C                                              | CDKN1A CDKN1B MYC                                                |
| 3                   | 0.038799015                 | 84            | 7.3                          | ErbB signaling pathway                                   | CDKN1A MYC HEL-S-1 CCNA2                                         |
| 4                   | 0.038799015                 | 161           | 5.1                          | Hepatitis B                                              | CDKN1A APC SMAD2 MYC                                             |
| 4                   | 0.04249957                  | 167           | 4.9                          | Hepatocellular carcinoma                                 | HEL-S-269 HSP90AA1 HEL-S-125m                                    |
| 4                   | 0.043034962                 | 169           | 4.9                          | Protein processing in endoplasmic reticulum              | UBE2D3                                                           |
| 3                   | 0.045693219                 | 92            | 6.7                          | Small cell lung cancer                                   | CDKN1A CDKN1B MYC                                                |

<sup>a</sup> number of genes enriched in the pathway

<sup>b</sup> FDR is adjusted from the hypergeometric test. Fold Enrichment indicates how drastically genes of a certain pathway is overrepresented.

| nGenes <sup>a</sup> | Enrichment FDR <sup>b</sup> | Pathway Genes | Fold Enrichment <sup>c</sup> | Pathway | Genes |
|---------------------|-----------------------------|---------------|------------------------------|---------|-------|
|---------------------|-----------------------------|---------------|------------------------------|---------|-------|

<sup>c</sup> Fold Enrichment is defined as the percentage of genes in the list belonging to a pathway, divided by the corresponding percentage in the background

**Supplementary Table S7.** miRWalk 2.0 consensus target predictions for miR-11400.

| mirnaid       | refseqid     | genesymbol | start | end  | binding<br>p | seed | phylopste<br>m | phylopflan<br>k | binding_region_lengt<br>h | longest_<br>consecut<br>ive_pairi<br>ngs | positio<br>n |
|---------------|--------------|------------|-------|------|--------------|------|----------------|-----------------|---------------------------|------------------------------------------|--------------|
| hsa-miR-11400 | NM_012154    | AGO2       | 9415  | 9431 | 1            | 1    | 0.62           | 0.09            | 16                        | 15                                       | 3UTR         |
| hsa-miR-11400 | NM_001164623 | AGO2       | 9313  | 9329 | 1            | 1    | 0.49           | 0.06            | 16                        | 15                                       | 3UTR         |
| hsa-miR-11400 | NM_177422    | AGO3       | 7056  | 7075 | 1            | 1    | 0.41           | 0.40            | 19                        | 10                                       | 3UTR         |
| hsa-miR-11400 | NM_024852    | AGO3       | 7314  | 7333 | 1            | 1    | 0.41           | 0.40            | 19                        | 10                                       | 3UTR         |
| hsa-miR-11400 | NM_017629    | AGO4       | 3705  | 3723 | 1            | 1    | 1.98           | 1.78            | 18                        | 9                                        | 3UTR         |
| hsa-miR-11400 | NM_001013630 | AADACL4    | 1768  | 1807 | 0.974359     | 1    | -0.79          | -0.85           | 39                        | 8                                        | 3UTR         |
| hsa-miR-11400 | NM_001271885 | AAGAB      | 3061  | 3080 | 1            | 1    | 0.00           | 0.00            | 19                        | 10                                       | 3UTR         |
| hsa-miR-11400 | NM_001271886 | AAGAB      | 3247  | 3266 | 1            | 1    | 0.10           | 1.21            | 19                        | 10                                       | 3UTR         |
| hsa-miR-11400 | NM_014911    | AAK1       | 8625  | 8646 | 1            | 1    | 1.24           | 0.86            | 21                        | 10                                       | 3UTR         |
| hsa-miR-11400 | NM_001371575 | AAK1       | 8507  | 8528 | 1            | 1    | 1.10           | 1.67            | 21                        | 10                                       | 3UTR         |
| hsa-miR-11400 | NM_020686    | ABAT       | 2444  | 2465 | 1            | 1    | -0.44          | -0.20           | 21                        | 8                                        | 3UTR         |
| hsa-miR-11400 | NM_000663    | ABAT       | 3246  | 3267 | 1            | 1    | -0.44          | -0.20           | 21                        | 8                                        | 3UTR         |
| hsa-miR-11400 | NM_001127448 | ABAT       | 2571  | 2592 | 1            | 1    | -0.44          | -0.20           | 21                        | 8                                        | 3UTR         |
| hsa-miR-11400 | NM_033450    | ABCC10     | 4808  | 4827 | 1            | 1    | -0.20          | -0.24           | 19                        | 18                                       | 3UTR         |

| mirnaid       | refseqid     | genesymbol | start | end  | binding<br>p | seed | phylopste<br>m | phylopflan<br>k | binding_region_lengt<br>h | longest_<br>consecut<br>ive_pairi<br>ngs | positio<br>n |
|---------------|--------------|------------|-------|------|--------------|------|----------------|-----------------|---------------------------|------------------------------------------|--------------|
| hsa-miR-11400 | NM_001198934 | ABCC10     | 4761  | 4780 | 1            | 1    | -0.20          | -0.24           | 19                        | 18                                       | 3UTR         |
| hsa-miR-11400 | NM_001301829 | ABCC4      | 4192  | 4207 | 1            | 1    | 4.11           | 3.67            | 15                        | 14                                       | 3UTR         |
| hsa-miR-11400 | NM_005845    | ABCC4      | 4333  | 4348 | 1            | 1    | 4.11           | 3.67            | 15                        | 14                                       | 3UTR         |
| hsa-miR-11400 | NM_001079528 | ABCC6      | 400   | 425  | 1            | 1    | -0.04          | 0.29            | 25                        | 8                                        | 3UTR         |
| hsa-miR-11400 | NM_005164    | ABCD2      | 2495  | 2517 | 1            | 1    | 0.43           | 0.18            | 22                        | 9                                        | 3UTR         |
| hsa-miR-11400 | NM_005164    | ABCD2      | 3184  | 3200 | 1            | 1    | 0.16           | 0.47            | 16                        | 10                                       | 3UTR         |
| hsa-miR-11400 | NM_022169    | ABCG4      | 3745  | 3764 | 1            | 1    | 1.22           | 1.66            | 19                        | 18                                       | 3UTR         |
| hsa-miR-11400 | NM_001142505 | ABCG4      | 3533  | 3552 | 1            | 1    | 1.22           | 1.66            | 19                        | 18                                       | 3UTR         |
| hsa-miR-11400 | NM_022437    | ABCG8      | 6905  | 6928 | 1            | 1    | 0.44           | -0.08           | 21                        | 8                                        | 3UTR         |
| hsa-miR-11400 | NM_016006    | ABHD5      | 4800  | 4823 | 1            | 1    | 0.09           | -0.12           | 23                        | 10                                       | 3UTR         |
| hsa-miR-11400 | NM_001355186 | ABHD5      | 1328  | 1350 | 1            | 1    | -0.49          | -0.08           | 22                        | 7                                        | 3UTR         |
| hsa-miR-11400 | NM_001365649 | ABHD5      | 5110  | 5133 | 1            | 1    | 0.09           | -0.12           | 23                        | 10                                       | 3UTR         |
| hsa-miR-11400 | NM_001365650 | ABHD5      | 4681  | 4704 | 1            | 1    | 0.09           | -0.12           | 23                        | 10                                       | 3UTR         |
| hsa-miR-11400 | NM_001135186 | ABI3       | 1411  | 1429 | 0.961538     | 1    | 0.00           | 0.00            | 18                        | 10                                       | 3UTR         |
| hsa-miR-11400 | NM_005158    | ABL2       | 7147  | 7175 | 1            | 1    | -0.77          | 0.38            | 19                        | 14                                       | 3UTR         |
| hsa-miR-11400 | NM_007314    | ABL2       | 7440  | 7468 | 1            | 1    | 0.51           | 0.17            | 19                        | 14                                       | 3UTR         |
| hsa-miR-11400 | NM_001136000 | ABL2       | 6838  | 6866 | 1            | 1    | 0.93           | 0.16            | 19                        | 14                                       | 3UTR         |

| mirnaid       | refseqid     | genesymbol | start | end  | binding<br>p | seed | phylopste<br>m | phylopflan<br>k | binding_region_lengt<br>h | longest_<br>consecut<br>ive_pairi<br>ngs | positio<br>n |
|---------------|--------------|------------|-------|------|--------------|------|----------------|-----------------|---------------------------|------------------------------------------|--------------|
| hsa-miR-11400 | NM_001168236 | ABL2       | 7377  | 7405 | 1            | 1    | -0.06          | 0.12            | 19                        | 14                                       | 3UTR         |
| hsa-miR-11400 | NM_001168237 | ABL2       | 7131  | 7159 | 1            | 1    | 0.73           | 0.33            | 19                        | 14                                       | 3UTR         |
| hsa-miR-11400 | NM_001168238 | ABL2       | 7068  | 7096 | 1            | 1    | 0.43           | 0.74            | 19                        | 14                                       | 3UTR         |
| hsa-miR-11400 | NM_001168239 | ABL2       | 6775  | 6803 | 1            | 1    | 0.67           | 0.20            | 19                        | 14                                       | 3UTR         |
| hsa-miR-11400 | NM_020469    | ABO        | 2257  | 2276 | 1            | 1    | 0.00           | 0.04            | 19                        | 7                                        | 3UTR         |
| hsa-miR-11400 | XM_005267418 | ACIN1      | 2432  | 2454 | 1            | 1    | 0.00           | 0.00            | 22                        | 11                                       | 3UTR         |
| hsa-miR-11400 | NM_014977    | ACIN1      | 4410  | 4431 | 1            | 1    | 3.47           | 2.74            | 21                        | 8                                        | 3UTR         |
| hsa-miR-11400 | NM_001164814 | ACIN1      | 4371  | 4392 | 1            | 1    | 3.47           | 2.74            | 21                        | 8                                        | 3UTR         |
| hsa-miR-11400 | NM_001164815 | ACIN1      | 4290  | 4311 | 1            | 1    | 3.47           | 2.74            | 21                        | 8                                        | 3UTR         |
| hsa-miR-11400 | NM_001302490 | ACP2       | 1586  | 1613 | 1            | 1    | 3.42           | 2.87            | 20                        | 8                                        | 3UTR         |
| hsa-miR-11400 | NM_001111035 | ACP5       | 1389  | 1406 | 1            | 1    | -0.89          | -0.08           | 17                        | 10                                       | 3UTR         |
| hsa-miR-11400 | NM_016361    | ACP6       | 2159  | 2179 | 1            | 1    | 0.12           | 0.08            | 20                        | 8                                        | 3UTR         |
| hsa-miR-11400 | NM_015162    | ACSBG1     | 2874  | 2927 | 1            | 1    | -0.23          | -0.10           | 23                        | 9                                        | 3UTR         |
| hsa-miR-11400 | XM_017022923 | ACSM2A     | 2802  | 2825 | 1            | 1    | 0.00           | 0.00            | 20                        | 12                                       | 3UTR         |
| hsa-miR-11400 | NM_001105069 | ACSM2B     | 2773  | 2796 | 1            | 1    | 0.30           | 0.04            | 20                        | 12                                       | 3UTR         |
| hsa-miR-11400 | NM_001199954 | ACTG1      | 1322  | 1342 | 0.974359     | 1    | 0.00           | 0.00            | 20                        | 11                                       | 3UTR         |
| hsa-miR-11400 | NM_005735    | ACTR1B     | 1862  | 1882 | 1            | 1    | 5.52           | 5.34            | 20                        | 12                                       | 3UTR         |

| mirnaid       | refseqid     | genesymbol | start | end  | binding<br>p | seed | phylopste<br>m | phylopflan<br>k | binding_region_lengt<br>h | longest_<br>consecut<br>ive_pairi<br>ngs | positio<br>n |
|---------------|--------------|------------|-------|------|--------------|------|----------------|-----------------|---------------------------|------------------------------------------|--------------|
| hsa-miR-11400 | NM_001282227 | ADA2       | 3296  | 3318 | 1            | 1    | 1.90           | 1.71            | 22                        | 7                                        | 3UTR         |
| hsa-miR-11400 | NM_001190956 | ADAM18     | 924   | 950  | 1            | 1    | 0.31           | -0.09           | 12                        | 10                                       | 3UTR         |
| hsa-miR-11400 | NM_016351    | ADAM22     | 4169  | 4219 | 1            | 1    | 0.01           | 0.13            | 42                        | 11                                       | 3UTR         |
| hsa-miR-11400 | NM_021722    | ADAM22     | 4256  | 4306 | 1            | 1    | 0.01           | 0.13            | 42                        | 11                                       | 3UTR         |
| hsa-miR-11400 | NM_021723    | ADAM22     | 4277  | 4327 | 1            | 1    | 0.01           | 0.13            | 42                        | 11                                       | 3UTR         |
| hsa-miR-11400 | NM_145004    | ADAM32     | 2476  | 2491 | 1            | 1    | 0.42           | 0.45            | 15                        | 12                                       | 3UTR         |
| hsa-miR-11400 | NM_030955    | ADAMTS12   | 5575  | 5594 | 1            | 1    | 2.88           | 3.27            | 19                        | 9                                        | 3UTR         |
| hsa-miR-11400 | NM_001324512 | ADAMTS12   | 5320  | 5339 | 1            | 1    | 0.27           | 0.13            | 19                        | 9                                        | 3UTR         |
| hsa-miR-11400 | NM_014243    | ADAMTS3    | 5495  | 5528 | 1            | 1    | 3.81           | 3.26            | 33                        | 9                                        | 3UTR         |
| hsa-miR-11400 | NM_182920    | ADAMTS9    | 7084  | 7106 | 1            | 1    | 3.17           | 2.94            | 22                        | 16                                       | 3UTR         |
| hsa-miR-11400 | NM_001318781 | ADAMTS9    | 7000  | 7022 | 1            | 1    | 3.17           | 2.94            | 22                        | 16                                       | 3UTR         |
| hsa-miR-11400 | XM_011521825 | ADAMTSL3   | 4470  | 4491 | 0.961538     | 1    | 0.00           | 0.00            | 21                        | 12                                       | 3UTR         |
| hsa-miR-11400 | NM_001281768 | ADCY1      | 1681  | 1701 | 1            | 1    | 0.00           | 0.00            | 20                        | 9                                        | 3UTR         |
| hsa-miR-11400 | NM_001118    | ADCYAP1R1  | 1891  | 1913 | 1            | 1    | 0.76           | 0.94            | 22                        | 11                                       | 3UTR         |
| hsa-miR-11400 | NM_001199635 | ADCYAP1R1  | 1975  | 1997 | 1            | 1    | -0.03          | 0.06            | 22                        | 11                                       | 3UTR         |
| hsa-miR-11400 | NM_001199637 | ADCYAP1R1  | 1828  | 1850 | 1            | 1    | 0.36           | 0.67            | 22                        | 11                                       | 3UTR         |
| hsa-miR-11400 | NM_153840    | ADGRF1     | 4496  | 4540 | 1            | 1    | 1.11           | 1.01            | 23                        | 16                                       | 3UTR         |

| mirnaid       | refseqid     | genesymbol | start | end  | binding<br>p | seed | phylopste<br>m | phylopflan<br>k | binding_region_lengt<br>h | longest_<br>consecut<br>ive_pairi<br>ngs | positio<br>n |
|---------------|--------------|------------|-------|------|--------------|------|----------------|-----------------|---------------------------|------------------------------------------|--------------|
| hsa-miR-11400 | XM_011514469 | ADGRF1     | 4183  | 4227 | 1            | 1    | 0.00           | 0.00            | 23                        | 16                                       | 3UTR         |
| hsa-miR-11400 | NM_153839    | ADGRF2     | 4803  | 4822 | 1            | 1    | -0.06          | 0.04            | 19                        | 13                                       | 3UTR         |
| hsa-miR-11400 | NM_005756    | ADGRG2     | 3820  | 3839 | 1            | 1    | 0.30           | 0.64            | 19                        | 8                                        | 3UTR         |
| hsa-miR-11400 | NM_001079859 | ADGRG2     | 3787  | 3806 | 1            | 1    | 0.64           | 0.55            | 19                        | 8                                        | 3UTR         |
| hsa-miR-11400 | NM_001079860 | ADGRG2     | 3763  | 3782 | 1            | 1    | 0.74           | 0.57            | 19                        | 8                                        | 3UTR         |
| hsa-miR-11400 | NM_001184833 | ADGRG2     | 3781  | 3800 | 1            | 1    | 0.55           | 0.67            | 19                        | 8                                        | 3UTR         |
| hsa-miR-11400 | NM_001184836 | ADGRG2     | 3757  | 3776 | 1            | 1    | 0.33           | 0.57            | 19                        | 8                                        | 3UTR         |
| hsa-miR-11400 | NM_001184837 | ADGRG2     | 3739  | 3758 | 1            | 1    | 0.39           | 0.48            | 19                        | 8                                        | 3UTR         |
| hsa-miR-11400 | NM_001308360 | ADGRG3     | 2117  | 2134 | 1            | 1    | -0.10          | -0.18           | 17                        | 8                                        | 3UTR         |
| hsa-miR-11400 | NM_001297704 | ADGRL2     | 4621  | 4635 | 1            | 1    | 4.65           | 4.45            | 14                        | 13                                       | 3UTR         |
| hsa-miR-11400 | NM_001297705 | ADGRL2     | 4762  | 4776 | 1            | 1    | 4.65           | 4.45            | 14                        | 13                                       | 3UTR         |
| hsa-miR-11400 | NM_001297706 | ADGRL2     | 4559  | 4573 | 1            | 1    | 4.65           | 4.45            | 14                        | 13                                       | 3UTR         |
| hsa-miR-11400 | XM_005270668 | ADGRL2     | 4802  | 4816 | 1            | 1    | 0.00           | 0.00            | 14                        | 13                                       | 3UTR         |
| hsa-miR-11400 | XM_017000784 | ADGRL2     | 4745  | 4759 | 1            | 1    | 0.00           | 0.00            | 14                        | 13                                       | 3UTR         |
| hsa-miR-11400 | XM_017000789 | ADGRL2     | 4726  | 4740 | 1            | 1    | 0.00           | 0.00            | 14                        | 13                                       | 3UTR         |
| hsa-miR-11400 | XM_024454350 | ADGRL2     | 5523  | 5537 | 1            | 1    | 0.00           | 0.00            | 14                        | 13                                       | 3UTR         |
| hsa-miR-11400 | XM_024454355 | ADGRL2     | 4636  | 4650 | 1            | 1    | 0.00           | 0.00            | 14                        | 13                                       | 3UTR         |



| mirnaid       | refseqid     | genesymbol | start | end  | binding<br>p | seed | phylopste<br>m | phylopflan<br>k | binding_region_lengt<br>h | longest_<br>consecut<br>ive_pairi<br>ngs | positio<br>n |
|---------------|--------------|------------|-------|------|--------------|------|----------------|-----------------|---------------------------|------------------------------------------|--------------|
| hsa-miR-11400 | NM_012302    | ADGRL2     | 4656  | 4670 | 1            | 1    | 4.65           | 4.45            | 14                        | 13                                       | 3UTR         |
| hsa-miR-11400 | NM_001330645 | ADGRL2     | 4695  | 4709 | 1            | 1    | 4.65           | 4.45            | 14                        | 13                                       | 3UTR         |
| hsa-miR-11400 | NM_001350699 | ADGRL2     | 4726  | 4740 | 1            | 1    | 4.65           | 4.45            | 14                        | 13                                       | 3UTR         |
| hsa-miR-11400 | NM_001366002 | ADGRL2     | 4756  | 4770 | 1            | 1    | 4.65           | 4.45            | 14                        | 13                                       | 3UTR         |
| hsa-miR-11400 | NM_001366009 | ADGRL2     | 4767  | 4781 | 1            | 1    | 4.65           | 4.45            | 14                        | 13                                       | 3UTR         |
| hsa-miR-11400 | NM_001286650 | ADH1B      | 3751  | 3791 | 1            | 1    | 2.61           | 1.76            | 27                        | 10                                       | 3UTR         |
| hsa-miR-11400 | NM_000668    | ADH1B      | 3643  | 3669 | 1            | 1    | 0.20           | 1.29            | 26                        | 10                                       | 3UTR         |
| hsa-miR-11400 | NM_004797    | ADIPOQ     | 3491  | 3517 | 0.961538     | 1    | 0.33           | 0.29            | 19                        | 10                                       | 3UTR         |
| hsa-miR-11400 | NM_001177800 | ADIPOQ     | 3542  | 3568 | 0.961538     | 1    | 0.33           | 0.29            | 19                        | 10                                       | 3UTR         |
| hsa-miR-11400 | NM_181442    | ADNP       | 5059  | 5077 | 1            | 1    | 5.18           | 5.00            | 18                        | 14                                       | 3UTR         |
| hsa-miR-11400 | NM_015339    | ADNP       | 5234  | 5252 | 1            | 1    | 5.76           | 4.76            | 18                        | 14                                       | 3UTR         |
| hsa-miR-11400 | NM_000676    | ADORA2B    | 1358  | 1396 | 1            | 1    | 0.05           | 0.43            | 21                        | 15                                       | 3UTR         |
| hsa-miR-11400 | NM_020233    | ADPRM      | 1329  | 1349 | 1            | 1    | -0.17          | 0.14            | 20                        | 16                                       | 3UTR         |
| hsa-miR-11400 | NM_001267043 | AEBP2      | 3382  | 3425 | 0.980769     | 1    | 0.01           | 0.15            | 20                        | 12                                       | 3UTR         |
| hsa-miR-11400 | NM_198595    | AFAP1      | 4717  | 4746 | 1            | 1    | -0.73          | -0.36           | 29                        | 10                                       | 3UTR         |
| hsa-miR-11400 | NM_001134647 | AFAP1      | 4969  | 4998 | 1            | 1    | -0.39          | -0.09           | 29                        | 10                                       | 3UTR         |
| hsa-miR-11400 | NM_001313959 | AFF1       | 5882  | 5901 | 1            | 1    | -0.10          | -0.11           | 19                        | 8                                        | 3UTR         |

| mirnaid       | refseqid     | genesymbol | start | end   | binding<br>p | seed | phylopste<br>m | phylopflan<br>k | binding_region_lengt<br>h | longest_<br>consecut<br>ive_pairi<br>ngs | positio<br>n |
|---------------|--------------|------------|-------|-------|--------------|------|----------------|-----------------|---------------------------|------------------------------------------|--------------|
| hsa-miR-11400 | NM_005935    | AFF1       | 5866  | 5885  | 1            | 1    | -0.10          | -0.11           | 19                        | 8                                        | 3UTR         |
| hsa-miR-11400 | NM_001170628 | AFF2       | 8062  | 8081  | 1            | 1    | 0.00           | 0.00            | 19                        | 8                                        | 3UTR         |
| hsa-miR-11400 | NM_001386135 | AFF3       | 9091  | 9115  | 1            | 1    | 0.00           | 0.00            | 24                        | 9                                        | 3UTR         |
| hsa-miR-11400 | NM_006796    | AFG3L2     | 2693  | 2714  | 1            | 1    | 0.20           | 2.14            | 21                        | 13                                       | 3UTR         |
| hsa-miR-11400 | XM_011510549 | AGAP1      | 10481 | 10533 | 1            | 1    | 0.00           | 0.00            | 33                        | 11                                       | 3UTR         |
| hsa-miR-11400 | NM_004504    | AGFG1      | 5242  | 5263  | 1            | 1    | -0.13          | -0.24           | 21                        | 7                                        | 3UTR         |
| hsa-miR-11400 | NM_001135187 | AGFG1      | 5308  | 5329  | 1            | 1    | 0.00           | 0.00            | 21                        | 7                                        | 3UTR         |
| hsa-miR-11400 | NM_001135188 | AGFG1      | 5236  | 5257  | 1            | 1    | 0.00           | 0.00            | 21                        | 7                                        | 3UTR         |
| hsa-miR-11400 | NM_001135189 | AGFG1      | 5122  | 5143  | 1            | 1    | -0.13          | -0.24           | 21                        | 7                                        | 3UTR         |
| hsa-miR-11400 | XM_017012114 | AGFG2      | 3919  | 3937  | 0.961538     | 1    | 0.00           | 0.00            | 18                        | 8                                        | 3UTR         |
| hsa-miR-11400 | XM_024446835 | AGK        | 4713  | 4740  | 1            | 1    | 0.00           | 0.00            | 21                        | 8                                        | 3UTR         |
| hsa-miR-11400 | XM_005261160 | AGPAT3     | 3534  | 3552  | 1            | 1    | 0.00           | 0.00            | 18                        | 17                                       | 3UTR         |
| hsa-miR-11400 | XM_006724030 | AGPAT3     | 3430  | 3448  | 1            | 1    | 0.00           | 0.00            | 18                        | 17                                       | 3UTR         |
| hsa-miR-11400 | NM_020133    | AGPAT4     | 2645  | 2660  | 1            | 1    | -0.61          | -0.79           | 15                        | 14                                       | 3UTR         |
| hsa-miR-11400 | XM_011512041 | AGPS       | 7212  | 7229  | 1            | 1    | 0.00           | 0.00            | 17                        | 13                                       | 3UTR         |
| hsa-miR-11400 | NM_003659    | AGPS       | 7400  | 7417  | 1            | 1    | 0.60           | 1.03            | 17                        | 13                                       | 3UTR         |
| hsa-miR-11400 | XM_011541802 | AGTRAP     | 1142  | 1170  | 1            | 1    | 0.00           | 0.00            | 22                        | 10                                       | 3UTR         |

| mirnaid       | refseqid     | genesymbol | start | end  | binding<br>p | seed | phylopste<br>m | phylopflan<br>k | binding_region_lengt<br>h | longest_<br>consecut<br>ive_pairi<br>ngs | positio<br>n |
|---------------|--------------|------------|-------|------|--------------|------|----------------|-----------------|---------------------------|------------------------------------------|--------------|
| hsa-miR-11400 | NM_001354571 | AHSG       | 1217  | 1236 | 1            | 1    | 0.53           | 0.68            | 19                        | 8                                        | 3UTR         |
| hsa-miR-11400 | NM_001622    | AHSG       | 1214  | 1233 | 1            | 1    | 0.53           | 0.68            | 19                        | 8                                        | 3UTR         |
| hsa-miR-11400 | NM_174858    | AK5        | 2417  | 2434 | 1            | 1    | -0.43          | -0.12           | 17                        | 16                                       | 3UTR         |
| hsa-miR-11400 | NM_012093    | AK5        | 2585  | 2602 | 1            | 1    | -0.43          | -0.12           | 17                        | 16                                       | 3UTR         |
| hsa-miR-11400 | NM_001317950 | AKNA       | 5022  | 5044 | 1            | 1    | 0.10           | -0.06           | 22                        | 10                                       | 3UTR         |
| hsa-miR-11400 | NM_001317952 | AKNA       | 4561  | 4583 | 1            | 1    | -0.57          | 0.06            | 22                        | 10                                       | 3UTR         |
| hsa-miR-11400 | NM_030767    | AKNA       | 4948  | 4970 | 1            | 1    | 1.56           | 0.19            | 22                        | 10                                       | 3UTR         |
| hsa-miR-11400 | XM_017012224 | AKR1B15    | 1272  | 1290 | 1            | 1    | 0.00           | 0.00            | 18                        | 8                                        | 3UTR         |
| hsa-miR-11400 | NM_005989    | AKR1D1     | 1472  | 1485 | 1            | 1    | 0.02           | 0.03            | 13                        | 12                                       | 3UTR         |
| hsa-miR-11400 | NM_001190906 | AKR1D1     | 1349  | 1362 | 1            | 1    | 0.02           | 0.03            | 13                        | 12                                       | 3UTR         |
| hsa-miR-11400 | NM_001190907 | AKR1D1     | 1389  | 1402 | 1            | 1    | 0.02           | 0.03            | 13                        | 12                                       | 3UTR         |
| hsa-miR-11400 | NM_001320979 | AKR7A2     | 1705  | 1731 | 1            | 1    | 4.38           | 3.22            | 21                        | 6                                        | 3UTR         |
| hsa-miR-11400 | XM_011526614 | AKT2       | 1559  | 1580 | 1            | 1    | 0.00           | 0.00            | 21                        | 14                                       | 3UTR         |
| hsa-miR-11400 | XM_024451417 | AKT2       | 1574  | 1595 | 1            | 1    | 0.00           | 0.00            | 21                        | 14                                       | 3UTR         |
| hsa-miR-11400 | NM_002860    | ALDH18A1   | 3116  | 3155 | 1            | 1    | 1.01           | 2.02            | 39                        | 8                                        | 3UTR         |
| hsa-miR-11400 | NM_001017423 | ALDH18A1   | 3110  | 3149 | 1            | 1    | 1.01           | 2.02            | 39                        | 8                                        | 3UTR         |
| hsa-miR-11400 | NM_001034173 | ALDH1L2    | 4536  | 4556 | 1            | 1    | -0.22          | -0.44           | 20                        | 10                                       | 3UTR         |

| mirnaid       | refseqid     | genesymbol | start | end  | binding<br>p | seed | phylopste<br>m | phylopflan<br>k | binding_region_lengt<br>h | longest_<br>consecut<br>ive_pairi<br>ngs | positio<br>n |
|---------------|--------------|------------|-------|------|--------------|------|----------------|-----------------|---------------------------|------------------------------------------|--------------|
| hsa-miR-11400 | NM_000690    | ALDH2      | 4099  | 4121 | 1            | 1    | -0.05          | 0.07            | 22                        | 9                                        | 3UTR         |
| hsa-miR-11400 | NM_021926    | ALX4       | 4435  | 4455 | 1            | 1    | 5.39           | 3.97            | 20                        | 6                                        | 3UTR         |
| hsa-miR-11400 | NM_001164690 | AMHR2      | 1546  | 1566 | 1            | 1    | 2.98           | 1.94            | 20                        | 10                                       | 3UTR         |
| hsa-miR-11400 | NM_198722    | AMIGO3     | 2513  | 2538 | 1            | 1    | 1.78           | 0.40            | 25                        | 11                                       | 3UTR         |
| hsa-miR-11400 | NM_015365    | AMMECR1    | 3958  | 3978 | 1            | 1    | -0.07          | 1.42            | 20                        | 9                                        | 3UTR         |
| hsa-miR-11400 | NM_001025580 | AMMECR1    | 3847  | 3867 | 1            | 1    | 0.32           | 1.24            | 20                        | 9                                        | 3UTR         |
| hsa-miR-11400 | NM_133265    | AMOT       | 4128  | 4150 | 1            | 1    | 3.66           | 2.90            | 22                        | 11                                       | 3UTR         |
| hsa-miR-11400 | NM_001113490 | AMOT       | 4543  | 4565 | 1            | 1    | 0.00           | 0.00            | 22                        | 11                                       | 3UTR         |
| hsa-miR-11400 | NM_001301007 | AMOTL1     | 7116  | 7135 | 1            | 1    | 0.29           | -0.19           | 19                        | 8                                        | 3UTR         |
| hsa-miR-11400 | NM_130847    | AMOTL1     | 7266  | 7285 | 1            | 1    | 0.29           | -0.19           | 19                        | 8                                        | 3UTR         |
| hsa-miR-11400 | NM_001278685 | AMOTL2     | 3062  | 3078 | 0.961538     | 1    | 2.35           | 2.46            | 16                        | 8                                        | 3UTR         |
| hsa-miR-11400 | NM_001278683 | AMOTL2     | 3192  | 3208 | 1            | 1    | 5.25           | 4.21            | 16                        | 8                                        | 3UTR         |
| hsa-miR-11400 | XM_006713654 | AMOTL2     | 3159  | 3175 | 1            | 1    | 0.00           | 0.00            | 16                        | 8                                        | 3UTR         |
| hsa-miR-11400 | NM_001256708 | ANAPC10    | 1480  | 1499 | 1            | 1    | 0.08           | 1.04            | 19                        | 10                                       | 3UTR         |
| hsa-miR-11400 | NM_001278485 | ANAPC15    | 596   | 612  | 1            | 1    | 3.75           | 4.43            | 16                        | 15                                       | 3UTR         |
| hsa-miR-11400 | NM_001278489 | ANAPC15    | 554   | 570  | 1            | 1    | 4.22           | 4.20            | 16                        | 15                                       | 3UTR         |
| hsa-miR-11400 | NM_001278490 | ANAPC15    | 499   | 515  | 1            | 1    | 2.77           | 4.14            | 16                        | 15                                       | 3UTR         |

| mirnaid       | refseqid     | genesymbol | start | end  | binding<br>p | seed | phylopste<br>m | phylopflan<br>k | binding_region_lengt<br>h | longest_<br>consecut<br>ive_pairi<br>ngs | positio<br>n |
|---------------|--------------|------------|-------|------|--------------|------|----------------|-----------------|---------------------------|------------------------------------------|--------------|
| hsa-miR-11400 | NM_001278492 | ANAPC15    | 590   | 606  | 1            | 1    | 3.40           | 4.39            | 16                        | 15                                       | 3UTR         |
| hsa-miR-11400 | NM_014042    | ANAPC15    | 584   | 600  | 1            | 1    | 3.75           | 4.43            | 16                        | 15                                       | 3UTR         |
| hsa-miR-11400 | NM_001330321 | ANAPC15    | 1358  | 1407 | 1            | 1    | 2.72           | 4.26            | 25                        | 10                                       | 3UTR         |
| hsa-miR-11400 | NM_173473    | ANAPC16    | 546   | 563  | 1            | 1    | 0.39           | 0.34            | 17                        | 9                                        | 3UTR         |
| hsa-miR-11400 | NM_001242546 | ANAPC16    | 888   | 907  | 1            | 1    | 4.35           | 4.35            | 19                        | 7                                        | 3UTR         |
| hsa-miR-11400 | NM_001242548 | ANAPC16    | 405   | 422  | 1            | 1    | 0.00           | 0.00            | 17                        | 9                                        | 3UTR         |
| hsa-miR-11400 | NM_004673    | ANGPTL1    | 2976  | 2992 | 1            | 1    | 0.77           | 1.65            | 16                        | 15                                       | 3UTR         |
| hsa-miR-11400 | NM_012098    | ANGPTL2    | 2979  | 3008 | 1            | 1    | 2.23           | 2.50            | 29                        | 10                                       | 3UTR         |
| hsa-miR-11400 | NM_001204403 | ANK3       | 7861  | 7881 | 1            | 1    | -0.12          | -0.06           | 20                        | 8                                        | 3UTR         |
| hsa-miR-11400 | NM_001358683 | ANKRD40CL  | 731   | 756  | 1            | 1    | -0.12          | 0.10            | 25                        | 8                                        | 3UTR         |
| hsa-miR-11400 | NM_145865    | ANKS4B     | 2751  | 2793 | 1            | 1    | -0.30          | -0.13           | 42                        | 9                                        | 3UTR         |
| hsa-miR-11400 | NM_001144960 | ANKUB1     | 2069  | 2089 | 1            | 1    | 0.15           | 0.26            | 20                        | 7                                        | 3UTR         |
| hsa-miR-11400 | NM_020959    | ANO8       | 3929  | 3945 | 1            | 1    | 0.84           | 0.65            | 16                        | 15                                       | 3UTR         |
| hsa-miR-11400 | NM_032208    | ANTXR1     | 3564  | 3582 | 1            | 1    | 0.12           | 0.12            | 18                        | 11                                       | 3UTR         |
| hsa-miR-11400 | NM_004034    | ANXA7      | 2081  | 2101 | 1            | 1    | 2.49           | 1.99            | 14                        | 12                                       | 3UTR         |
| hsa-miR-11400 | NM_001156    | ANXA7      | 2015  | 2035 | 1            | 1    | 2.49           | 1.99            | 14                        | 12                                       | 3UTR         |
| hsa-miR-11400 | XM_011510600 | AP1S3      | 1764  | 1785 | 1            | 1    | 0.00           | 0.00            | 21                        | 9                                        | 3UTR         |

| mirnaid       | refseqid     | genesymbol | start | end  | binding<br>p | seed | phylopste<br>m | phylopflan<br>k | binding_region_lengt<br>h | longest_<br>consecut<br>ive_pairi<br>ngs | positio<br>n |
|---------------|--------------|------------|-------|------|--------------|------|----------------|-----------------|---------------------------|------------------------------------------|--------------|
| hsa-miR-11400 | NM_001039569 | AP1S3      | 1902  | 1923 | 1            | 1    | -0.18          | -0.01           | 21                        | 9                                        | 3UTR         |
| hsa-miR-11400 | NM_001242837 | AP2A2      | 3439  | 3456 | 1            | 1    | 0.00           | 0.00            | 17                        | 10                                       | 3UTR         |
| hsa-miR-11400 | NM_207012    | AP3M1      | 2019  | 2036 | 1            | 1    | 0.03           | -0.01           | 17                        | 11                                       | 3UTR         |
| hsa-miR-11400 | NM_005829    | AP3S2      | 2381  | 2399 | 0.980769     | 1    | 0.43           | -0.17           | 18                        | 11                                       | 3UTR         |
| hsa-miR-11400 | NM_153360    | APCDD1L    | 2296  | 2318 | 1            | 1    | 4.21           | 2.65            | 22                        | 11                                       | 3UTR         |
| hsa-miR-11400 | NM_031301    | APH1B      | 3595  | 3616 | 1            | 1    | 0.13           | -0.13           | 21                        | 11                                       | 3UTR         |
| hsa-miR-11400 | XM_024450085 | APH1B      | 3600  | 3621 | 1            | 1    | 0.00           | 0.00            | 21                        | 11                                       | 3UTR         |
| hsa-miR-11400 | NM_001145646 | APH1B      | 3472  | 3493 | 1            | 1    | 0.27           | 0.12            | 21                        | 11                                       | 3UTR         |
| hsa-miR-11400 | NM_001642    | APLP2      | 3104  | 3119 | 0.974359     | 1    | 0.68           | 0.15            | 15                        | 14                                       | 3UTR         |
| hsa-miR-11400 | NM_001142276 | APLP2      | 3068  | 3083 | 0.974359     | 1    | 0.68           | 0.15            | 15                        | 14                                       | 3UTR         |
| hsa-miR-11400 | NM_001142277 | APLP2      | 2900  | 2915 | 0.974359     | 1    | 0.68           | 0.15            | 15                        | 14                                       | 3UTR         |
| hsa-miR-11400 | NM_001142278 | APLP2      | 2381  | 2396 | 0.974359     | 1    | 0.68           | 0.15            | 15                        | 14                                       | 3UTR         |
| hsa-miR-11400 | NM_001243299 | APLP2      | 3059  | 3074 | 0.974359     | 1    | 0.68           | 0.15            | 15                        | 14                                       | 3UTR         |
| hsa-miR-11400 | XM_011529992 | APOBEC3H   | 1109  | 1138 | 1            | 1    | 0.00           | 0.00            | 21                        | 7                                        | 3UTR         |
| hsa-miR-11400 | NM_198450    | APOOL      | 5596  | 5616 | 1            | 1    | 2.55           | 1.46            | 15                        | 13                                       | 3UTR         |
| hsa-miR-11400 | NM_198450    | APOOL      | 847   | 871  | 1            | 1    | 0.26           | 2.09            | 19                        | 9                                        | 3UTR         |
| hsa-miR-11400 | NM_001251905 | APPL2      | 2866  | 2885 | 1            | 1    | 5.36           | 4.60            | 19                        | 10                                       | 3UTR         |

| mirnaid       | refseqid     | genesymbol | start | end  | binding<br>p | seed | phylopste<br>m | phylopflan<br>k | binding_region_lengt<br>h | longest_<br>consecut<br>ive_pairi<br>ngs | positio<br>n |
|---------------|--------------|------------|-------|------|--------------|------|----------------|-----------------|---------------------------|------------------------------------------|--------------|
| hsa-miR-11400 | NM_001317384 | AQP4       | 1413  | 1432 | 1            | 1    | 0.44           | 0.06            | 19                        | 7                                        | 3UTR         |
| hsa-miR-11400 | NM_001317387 | AQP4       | 1332  | 1351 | 1            | 1    | -0.32          | 0.11            | 19                        | 7                                        | 3UTR         |
| hsa-miR-11400 | NM_001318156 | AQP7       | 2078  | 2101 | 1            | 1    | 0.00           | 0.00            | 23                        | 13                                       | 3UTR         |
| hsa-miR-11400 | XM_017014700 | AQP7       | 2570  | 2593 | 1            | 1    | 0.00           | 0.00            | 23                        | 13                                       | 3UTR         |
| hsa-miR-11400 | XM_024447539 | AQP7       | 1895  | 1918 | 1            | 1    | 0.00           | 0.00            | 23                        | 13                                       | 3UTR         |
| hsa-miR-11400 | NM_014691    | AQR        | 5265  | 5283 | 1            | 1    | 1.61           | 2.20            | 18                        | 6                                        | 3UTR         |
| hsa-miR-11400 | NM_020340    | ARFGEF3    | 7401  | 7421 | 1            | 1    | 0.37           | 0.27            | 20                        | 12                                       | 3UTR         |
| hsa-miR-11400 | NM_001287431 | ARFIP1     | 1770  | 1788 | 1            | 1    | 1.19           | 1.68            | 18                        | 9                                        | 3UTR         |
| hsa-miR-11400 | NM_014447    | ARFIP1     | 1674  | 1692 | 1            | 1    | 1.19           | 1.68            | 18                        | 9                                        | 3UTR         |
| hsa-miR-11400 | NM_001025593 | ARFIP1     | 1809  | 1827 | 1            | 1    | 1.19           | 1.68            | 18                        | 9                                        | 3UTR         |
| hsa-miR-11400 | NM_001025595 | ARFIP1     | 1905  | 1923 | 1            | 1    | 0.77           | 1.61            | 18                        | 9                                        | 3UTR         |
| hsa-miR-11400 | NM_001242854 | ARFIP2     | 1300  | 1320 | 1            | 1    | 2.84           | 1.61            | 20                        | 6                                        | 3UTR         |
| hsa-miR-11400 | NM_001270696 | ARHGAP12   | 3965  | 3982 | 1            | 1    | 5.03           | 3.78            | 17                        | 16                                       | 3UTR         |
| hsa-miR-11400 | NM_018287    | ARHGAP12   | 4055  | 4072 | 1            | 1    | 5.03           | 3.78            | 17                        | 16                                       | 3UTR         |
| hsa-miR-11400 | NM_001204300 | ARHGAP19   | 4020  | 4051 | 1            | 1    | 0.00           | 0.00            | 31                        | 11                                       | 3UTR         |
| hsa-miR-11400 | NM_001287602 | ARHGAP30   | 3415  | 3434 | 1            | 1    | 1.12           | 2.08            | 19                        | 8                                        | 3UTR         |
| hsa-miR-11400 | NM_004309    | ARHGDIA    | 1087  | 1107 | 1            | 1    | 0.81           | 1.04            | 15                        | 13                                       | 3UTR         |

| mirnaid       | refseqid     | genesymbol | start | end  | binding<br>p | seed | phylopste<br>m | phylopflan<br>k | binding_region_lengt<br>h | longest_<br>consecut<br>ive_pairi<br>ngs | positio<br>n |
|---------------|--------------|------------|-------|------|--------------|------|----------------|-----------------|---------------------------|------------------------------------------|--------------|
| hsa-miR-11400 | NM_001185078 | ARHGDI A   | 955   | 975  | 1            | 1    | 0.95           | 0.42            | 15                        | 13                                       | 3UTR         |
| hsa-miR-11400 | NM_173728    | ARHGEF15   | 2723  | 2744 | 1            | 1    | -0.16          | 0.46            | 21                        | 10                                       | 3UTR         |
| hsa-miR-11400 | NM_173728    | ARHGEF15   | 2893  | 2921 | 1            | 1    | 0.53           | 0.14            | 28                        | 6                                        | 3UTR         |
| hsa-miR-11400 | NM_025014    | ARHGEF15   | 2662  | 2683 | 1            | 1    | -0.16          | 0.46            | 21                        | 10                                       | 3UTR         |
| hsa-miR-11400 | NM_025014    | ARHGEF15   | 2832  | 2860 | 1            | 1    | 0.53           | 0.14            | 28                        | 6                                        | 3UTR         |
| hsa-miR-11400 | NM_015595    | ARHGEF26   | 2965  | 2988 | 1            | 1    | -0.20          | 0.00            | 23                        | 9                                        | 3UTR         |
| hsa-miR-11400 | NM_001251962 | ARHGEF26   | 3068  | 3091 | 1            | 1    | 0.00           | 0.00            | 23                        | 9                                        | 3UTR         |
| hsa-miR-11400 | NM_001251963 | ARHGEF26   | 2900  | 2923 | 1            | 1    | -0.20          | 0.00            | 23                        | 9                                        | 3UTR         |
| hsa-miR-11400 | NM_001289698 | ARHGEF3    | 2069  | 2090 | 0.980769     | 1    | 0.91           | 3.23            | 21                        | 8                                        | 3UTR         |
| hsa-miR-11400 | NM_001320854 | ARHGEF7    | 3542  | 3572 | 1            | 1    | 0.02           | 0.14            | 30                        | 9                                        | 3UTR         |
| hsa-miR-11400 | NM_005224    | ARID3A     | 5364  | 5390 | 1            | 1    | 0.16           | 0.07            | 20                        | 18                                       | 3UTR         |
| hsa-miR-11400 | NM_005744    | ARIH1      | 9331  | 9358 | 1            | 1    | -0.19          | -0.02           | 27                        | 8                                        | 3UTR         |
| hsa-miR-11400 | NM_001317333 | ARIH2      | 2513  | 2531 | 1            | 1    | 0.12           | 0.24            | 18                        | 11                                       | 3UTR         |
| hsa-miR-11400 | NM_006321    | ARIH2      | 2391  | 2409 | 1            | 1    | 0.12           | 0.24            | 18                        | 11                                       | 3UTR         |
| hsa-miR-11400 | NM_019087    | ARL15      | 1893  | 1916 | 1            | 1    | -0.07          | 0.30            | 23                        | 11                                       | 3UTR         |
| hsa-miR-11400 | NM_001113738 | ARL17A     | 2853  | 2887 | 1            | 1    | -0.08          | -0.16           | 22                        | 9                                        | 3UTR         |
| hsa-miR-11400 | NM_001039083 | ARL17B     | 2853  | 2887 | 1            | 1    | 0.20           | -0.10           | 22                        | 9                                        | 3UTR         |



| mirnaid       | refseqid     | genesymbol | start | end  | binding<br>p | seed | phylopste<br>m | phylopflan<br>k | binding_region_lengt<br>h | longest_<br>consecut<br>ive_pairi<br>ngs | positio<br>n |
|---------------|--------------|------------|-------|------|--------------|------|----------------|-----------------|---------------------------|------------------------------------------|--------------|
| hsa-miR-11400 | NM_001195396 | ARL4A      | 1044  | 1061 | 1            | 1    | 3.84           | 4.39            | 17                        | 16                                       | 3UTR         |
| hsa-miR-11400 | NM_177985    | ARL5A      | 3417  | 3437 | 1            | 1    | 0.83           | 0.38            | 20                        | 7                                        | 3UTR         |
| hsa-miR-11400 | NM_012097    | ARL5A      | 3675  | 3695 | 1            | 1    | 0.39           | 0.43            | 20                        | 7                                        | 3UTR         |
| hsa-miR-11400 | XM_005260157 | ARMC6      | 2055  | 2074 | 1            | 1    | 0.00           | 0.00            | 19                        | 7                                        | 3UTR         |
| hsa-miR-11400 | NM_001267041 | ARMC8      | 2989  | 3010 | 1            | 1    | 1.46           | 1.28            | 18                        | 7                                        | 3UTR         |
| hsa-miR-11400 | NM_001267042 | ARMC8      | 2598  | 2619 | 1            | 1    | 1.46           | 1.28            | 18                        | 7                                        | 3UTR         |
| hsa-miR-11400 | NM_001282342 | ARMC8      | 2629  | 2650 | 1            | 1    | 1.46           | 1.28            | 18                        | 7                                        | 3UTR         |
| hsa-miR-11400 | NM_213654    | ARMC8      | 1746  | 1775 | 1            | 1    | 2.50           | 2.26            | 21                        | 9                                        | 3UTR         |
| hsa-miR-11400 | NM_015396    | ARMC8      | 2875  | 2896 | 1            | 1    | 1.46           | 1.28            | 18                        | 7                                        | 3UTR         |
| hsa-miR-11400 | NM_014154    | ARMC8      | 1692  | 1721 | 1            | 1    | 2.50           | 2.26            | 21                        | 9                                        | 3UTR         |
| hsa-miR-11400 | NM_001363941 | ARMC8      | 3029  | 3050 | 1            | 1    | 1.46           | 1.28            | 18                        | 7                                        | 3UTR         |
| hsa-miR-11400 | XM_006719112 | ARNTL2     | 2643  | 2675 | 1            | 1    | 0.00           | 0.00            | 32                        | 8                                        | 3UTR         |
| hsa-miR-11400 | XM_011520769 | ARNTL2     | 2583  | 2615 | 1            | 1    | 0.00           | 0.00            | 32                        | 8                                        | 3UTR         |
| hsa-miR-11400 | NM_020183    | ARNTL2     | 2702  | 2734 | 1            | 1    | 0.30           | 0.20            | 32                        | 8                                        | 3UTR         |
| hsa-miR-11400 | NM_001248002 | ARNTL2     | 2660  | 2692 | 1            | 1    | 0.00           | 0.00            | 32                        | 8                                        | 3UTR         |
| hsa-miR-11400 | NM_001248003 | ARNTL2     | 2591  | 2623 | 1            | 1    | 0.00           | 0.00            | 32                        | 8                                        | 3UTR         |
| hsa-miR-11400 | NM_001248004 | ARNTL2     | 2558  | 2590 | 1            | 1    | 0.30           | 0.20            | 32                        | 8                                        | 3UTR         |

| mirnaid       | refseqid     | genesymbol  | start | end  | binding<br>p | seed | phylopste<br>m | phylopflan<br>k | binding_region_lengt<br>h | longest_<br>consecut<br>ive_pairi<br>ngs | positio<br>n |
|---------------|--------------|-------------|-------|------|--------------|------|----------------|-----------------|---------------------------|------------------------------------------|--------------|
| hsa-miR-11400 | NM_001248005 | ARNTL2      | 2482  | 2514 | 1            | 1    | 0.30           | 0.20            | 32                        | 8                                        | 3UTR         |
| hsa-miR-11400 | NM_001198793 | ARPC4-TTLL3 | 2580  | 2599 | 1            | 1    | 0.19           | 0.49            | 19                        | 8                                        | 3UTR         |
| hsa-miR-11400 | NM_001270439 | ARPC5       | 4687  | 4713 | 0.980769     | 1    | -0.06          | -0.30           | 21                        | 12                                       | 3UTR         |
| hsa-miR-11400 | NM_005717    | ARPC5       | 4678  | 4704 | 0.980769     | 1    | 0.09           | -0.14           | 21                        | 12                                       | 3UTR         |
| hsa-miR-11400 | NM_001270439 | ARPC5       | 6234  | 6251 | 1            | 1    | 2.59           | 1.17            | 17                        | 16                                       | 3UTR         |
| hsa-miR-11400 | NM_005717    | ARPC5       | 6225  | 6242 | 1            | 1    | 0.97           | 0.96            | 17                        | 16                                       | 3UTR         |
| hsa-miR-11400 | NM_182616    | ARPIN       | 2220  | 2256 | 1            | 1    | -0.19          | 0.08            | 20                        | 8                                        | 3UTR         |
| hsa-miR-11400 | NM_001199058 | ARPIN-AP3S2 | 3056  | 3074 | 0.980769     | 1    | -0.20          | -0.20           | 18                        | 11                                       | 3UTR         |
| hsa-miR-11400 | NM_001267618 | ARPP21      | 1710  | 1757 | 1            | 1    | 0.03           | 0.52            | 20                        | 7                                        | 3UTR         |
| hsa-miR-11400 | NM_198399    | ARPP21      | 1604  | 1651 | 1            | 1    | 0.03           | 0.52            | 20                        | 7                                        | 3UTR         |
| hsa-miR-11400 | NM_001025068 | ARPP21      | 1616  | 1663 | 1            | 1    | 0.03           | 0.52            | 20                        | 7                                        | 3UTR         |
| hsa-miR-11400 | NM_001025069 | ARPP21      | 1625  | 1672 | 1            | 1    | 0.03           | 0.52            | 20                        | 7                                        | 3UTR         |
| hsa-miR-11400 | NM_020801    | ARRDC3      | 3849  | 3876 | 0.961538     | 1    | 4.85           | 5.74            | 27                        | 8                                        | 3UTR         |
| hsa-miR-11400 | NM_001247996 | ASAP1       | 3799  | 3821 | 0.961538     | 1    | 5.14           | 5.23            | 22                        | 11                                       | 3UTR         |
| hsa-miR-11400 | XM_017013467 | ASAP1       | 3530  | 3552 | 1            | 1    | 0.00           | 0.00            | 22                        | 11                                       | 3UTR         |
| hsa-miR-11400 | NM_018482    | ASAP1       | 3697  | 3719 | 1            | 1    | 4.81           | 3.81            | 22                        | 11                                       | 3UTR         |
| hsa-miR-11400 | NM_001012428 | ASB11       | 1976  | 1994 | 1            | 1    | 0.00           | 0.00            | 18                        | 10                                       | 3UTR         |

| mirnaid       | refseqid     | genesymbol | start | end  | binding<br>p | seed | phylopste<br>m | phylopflan<br>k | binding_region_lengt<br>h | longest_<br>consecut<br>ive_pairi<br>ngs | positio<br>n |
|---------------|--------------|------------|-------|------|--------------|------|----------------|-----------------|---------------------------|------------------------------------------|--------------|
| hsa-miR-11400 | NM_001201583 | ASB11      | 1950  | 1968 | 1            | 1    | 0.00           | 0.00            | 18                        | 10                                       | 3UTR         |
| hsa-miR-11400 | NM_001142733 | ASB14      | 2746  | 2768 | 1            | 1    | 3.76           | 3.18            | 22                        | 9                                        | 3UTR         |
| hsa-miR-11400 | NM_001319301 | ASB8       | 829   | 848  | 0.969231     | 1    | 0.40           | -0.07           | 19                        | 9                                        | 3UTR         |
| hsa-miR-11400 | NM_001369093 | ASCC1      | 1993  | 2030 | 1            | 1    | 3.86           | 4.14            | 37                        | 14                                       | 3UTR         |
| hsa-miR-11400 | NM_001369108 | ASCC1      | 1768  | 1805 | 1            | 1    | 3.76           | 3.70            | 37                        | 14                                       | 3UTR         |
| hsa-miR-11400 | NM_001369111 | ASCC1      | 1907  | 1944 | 1            | 1    | 3.86           | 4.14            | 37                        | 14                                       | 3UTR         |
| hsa-miR-11400 | NM_001369112 | ASCC1      | 1682  | 1719 | 1            | 1    | 3.76           | 3.70            | 37                        | 14                                       | 3UTR         |
| hsa-miR-11400 | NM_001198799 | ASCC1      | 1323  | 1342 | 1            | 1    | 3.42           | 2.22            | 19                        | 16                                       | 3UTR         |
| hsa-miR-11400 | NM_001198800 | ASCC1      | 1888  | 1925 | 1            | 1    | 3.76           | 3.70            | 37                        | 14                                       | 3UTR         |
| hsa-miR-11400 | NM_032468    | ASPH       | 1049  | 1066 | 1            | 1    | 0.56           | 1.68            | 17                        | 10                                       | 3UTR         |
| hsa-miR-11400 | NM_032468    | ASPH       | 1508  | 1529 | 1            | 1    | 0.81           | 0.72            | 21                        | 8                                        | 3UTR         |
| hsa-miR-11400 | NM_001164751 | ASPH       | 1046  | 1063 | 1            | 1    | 0.49           | 1.72            | 17                        | 10                                       | 3UTR         |
| hsa-miR-11400 | NM_001164751 | ASPH       | 2421  | 2438 | 1            | 0    | 2.20           | 2.00            | 17                        | 11                                       | 3UTR         |
| hsa-miR-11400 | NM_001164751 | ASPH       | 1505  | 1526 | 1            | 1    | 0.57           | 0.62            | 21                        | 8                                        | 3UTR         |
| hsa-miR-11400 | NM_001164753 | ASPH       | 1379  | 1400 | 1            | 1    | 0.95           | 0.34            | 21                        | 8                                        | 3UTR         |
| hsa-miR-11400 | NM_032810    | ATAD1      | 4431  | 4451 | 1            | 1    | 0.86           | 0.52            | 20                        | 13                                       | 3UTR         |
| hsa-miR-11400 | NM_033064    | ATCAY      | 4036  | 4061 | 1            | 1    | -0.17          | -0.23           | 25                        | 8                                        | 3UTR         |

| mirnaid       | refseqid     | genesymbol | start | end  | binding<br>p | seed | phylopste<br>m | phylopflan<br>k | binding_region_lengt<br>h | longest_<br>consecut<br>ive_pairi<br>ngs | positio<br>n |
|---------------|--------------|------------|-------|------|--------------|------|----------------|-----------------|---------------------------|------------------------------------------|--------------|
| hsa-miR-11400 | NM_012068    | ATF5       | 1820  | 1852 | 1            | 1    | -0.05          | 0.00            | 19                        | 8                                        | 3UTR         |
| hsa-miR-11400 | NM_001193646 | ATF5       | 1615  | 1647 | 1            | 1    | -0.05          | 0.00            | 19                        | 8                                        | 3UTR         |
| hsa-miR-11400 | NM_031482    | ATG10      | 1148  | 1175 | 1            | 1    | 0.06           | 0.02            | 27                        | 10                                       | 3UTR         |
| hsa-miR-11400 | XM_005248611 | ATG10      | 991   | 1018 | 1            | 1    | 0.00           | 0.00            | 27                        | 10                                       | 3UTR         |
| hsa-miR-11400 | NM_001131028 | ATG10      | 1283  | 1310 | 1            | 1    | 0.06           | 0.02            | 27                        | 10                                       | 3UTR         |
| hsa-miR-11400 | NM_014924    | ATG14      | 2491  | 2536 | 1            | 1    | 1.30           | 0.58            | 22                        | 9                                        | 3UTR         |
| hsa-miR-11400 | NM_001278712 | ATG3       | 2626  | 2648 | 1            | 1    | 0.79           | 2.01            | 22                        | 11                                       | 3UTR         |
| hsa-miR-11400 | NM_001308076 | ATL2       | 2562  | 2580 | 1            | 1    | 4.39           | 3.64            | 18                        | 8                                        | 3UTR         |
| hsa-miR-11400 | NM_022374    | ATL2       | 2755  | 2773 | 1            | 1    | 4.25           | 4.44            | 18                        | 8                                        | 3UTR         |
| hsa-miR-11400 | NM_001330458 | ATL2       | 2033  | 2051 | 1            | 1    | 4.60           | 3.57            | 18                        | 8                                        | 3UTR         |
| hsa-miR-11400 | NM_001135673 | ATL2       | 2278  | 2296 | 1            | 1    | 4.25           | 4.44            | 18                        | 8                                        | 3UTR         |
| hsa-miR-11400 | NM_012069    | ATP1B4     | 1230  | 1263 | 1            | 1    | 1.23           | 0.98            | 33                        | 8                                        | 3UTR         |
| hsa-miR-11400 | NM_001142447 | ATP1B4     | 1242  | 1275 | 1            | 1    | 1.23           | 0.98            | 33                        | 8                                        | 3UTR         |
| hsa-miR-11400 | NM_000704    | ATP4A      | 3396  | 3429 | 1            | 1    | 1.09           | 2.85            | 20                        | 13                                       | 3UTR         |
| hsa-miR-11400 | NM_001689    | ATP5MC3    | 1914  | 1942 | 1            | 1    | 3.20           | 3.33            | 22                        | 7                                        | 3UTR         |
| hsa-miR-11400 | NM_005765    | ATP6AP2    | 1693  | 1708 | 1            | 1    | 0.75           | 0.44            | 15                        | 14                                       | 3UTR         |
| hsa-miR-11400 | NM_000052    | ATP7A      | 6969  | 6986 | 1            | 1    | 0.19           | 0.08            | 17                        | 10                                       | 3UTR         |

| mirnaid       | refseqid     | genesymbol | start | end  | binding<br>p | seed | phylopste<br>m | phylopflan<br>k | binding_region_lengt<br>h | longest_<br>consecut<br>ive_pairi<br>ngs | positio<br>n |
|---------------|--------------|------------|-------|------|--------------|------|----------------|-----------------|---------------------------|------------------------------------------|--------------|
| hsa-miR-11400 | XM_005266419 | ATP8A2     | 9066  | 9089 | 1            | 1    | 0.00           | 0.00            | 23                        | 10                                       | 3UTR         |
| hsa-miR-11400 | NM_016529    | ATP8A2     | 9349  | 9372 | 1            | 1    | 1.80           | 1.56            | 23                        | 10                                       | 3UTR         |
| hsa-miR-11400 | NM_138813    | ATP8B3     | 4456  | 4476 | 1            | 1    | 1.30           | 2.03            | 20                        | 9                                        | 3UTR         |
| hsa-miR-11400 | NM_001178002 | ATP8B3     | 4404  | 4424 | 1            | 1    | 2.56           | 2.84            | 20                        | 9                                        | 3UTR         |
| hsa-miR-11400 | NM_006045    | ATP9A      | 5968  | 5988 | 1            | 1    | 4.50           | 4.91            | 20                        | 13                                       | 3UTR         |
| hsa-miR-11400 | NM_001256418 | ATPAF1     | 1640  | 1660 | 1            | 1    | 0.07           | -0.08           | 20                        | 7                                        | 3UTR         |
| hsa-miR-11400 | NM_001243728 | ATPAF1     | 1549  | 1569 | 1            | 1    | 0.07           | -0.08           | 20                        | 7                                        | 3UTR         |
| hsa-miR-11400 | NM_001128164 | ATXN1      | 7139  | 7158 | 1            | 1    | 3.75           | 3.45            | 19                        | 12                                       | 3UTR         |
| hsa-miR-11400 | NM_001136262 | ATXN7L3B   | 785   | 800  | 1            | 1    | -0.08          | 0.18            | 15                        | 9                                        | 3UTR         |
| hsa-miR-11400 | NM_024037    | AUNIP      | 1417  | 1439 | 1            | 1    | 0.00           | 0.44            | 22                        | 7                                        | 3UTR         |
| hsa-miR-11400 | NM_001127232 | AUTS2      | 2886  | 2908 | 1            | 1    | 0.28           | 0.17            | 22                        | 10                                       | 3UTR         |
| hsa-miR-11400 | NM_000706    | AVPR1A     | 2657  | 2679 | 1            | 1    | 0.03           | 0.13            | 22                        | 8                                        | 3UTR         |
| hsa-miR-11400 | XM_005265392 | AZI2       | 3278  | 3316 | 1            | 1    | 0.00           | 0.00            | 21                        | 12                                       | 3UTR         |
| hsa-miR-11400 | NM_022461    | AZI2       | 3895  | 3925 | 1            | 1    | 5.44           | 3.15            | 22                        | 7                                        | 3UTR         |
| hsa-miR-11400 | NM_001277155 | B3GALNT2   | 3142  | 3167 | 1            | 1    | 1.44           | 1.34            | 25                        | 8                                        | 3UTR         |
| hsa-miR-11400 | NM_003783    | B3GALT2    | 2986  | 3008 | 1            | 1    | 2.99           | 2.95            | 22                        | 7                                        | 3UTR         |
| hsa-miR-11400 | NM_054025    | B3GAT1     | 2197  | 2213 | 1            | 1    | 1.08           | 0.95            | 16                        | 15                                       | 3UTR         |

| mirnaid       | refseqid     | genesymbol | start | end  | binding<br>p | seed | phylopste<br>m | phylopflan<br>k | binding_region_lengt<br>h | longest_<br>consecut<br>ive_pairi<br>ngs | positio<br>n |
|---------------|--------------|------------|-------|------|--------------|------|----------------|-----------------|---------------------------|------------------------------------------|--------------|
| hsa-miR-11400 | NM_194318    | B3GLCT     | 3019  | 3056 | 1            | 1    | 0.55           | 0.05            | 19                        | 8                                        | 3UTR         |
| hsa-miR-11400 | NM_001320743 | B3GNTL1    | 2499  | 2521 | 1            | 1    | 3.29           | 2.65            | 22                        | 10                                       | 3UTR         |
| hsa-miR-11400 | NM_001276468 | B4GALNT1   | 3422  | 3440 | 1            | 1    | 1.98           | 1.38            | 18                        | 9                                        | 3UTR         |
| hsa-miR-11400 | XM_005268773 | B4GALNT1   | 3911  | 3929 | 1            | 1    | 0.00           | 0.00            | 18                        | 9                                        | 3UTR         |
| hsa-miR-11400 | NM_004776    | B4GALT5    | 1425  | 1449 | 1            | 1    | 1.22           | 1.74            | 24                        | 8                                        | 3UTR         |
| hsa-miR-11400 | NM_015681    | B9D1       | 775   | 792  | 0.980769     | 1    | 4.86           | 3.40            | 17                        | 9                                        | 3UTR         |
| hsa-miR-11400 | NM_001321214 | B9D1       | 864   | 881  | 0.980769     | 1    | 4.86           | 3.40            | 17                        | 9                                        | 3UTR         |
| hsa-miR-11400 | NM_001321215 | B9D1       | 3028  | 3046 | 1            | 1    | 4.33           | 4.21            | 18                        | 9                                        | 3UTR         |
| hsa-miR-11400 | NM_004282    | BAG2       | 3397  | 3414 | 1            | 1    | -0.02          | -0.12           | 17                        | 14                                       | 3UTR         |
| hsa-miR-11400 | NM_017450    | BAIAP2     | 2362  | 2380 | 1            | 1    | -0.19          | -0.13           | 18                        | 8                                        | 3UTR         |
| hsa-miR-11400 | NM_001385146 | BAIAP2     | 2355  | 2373 | 1            | 1    | -0.19          | -0.13           | 18                        | 8                                        | 3UTR         |
| hsa-miR-11400 | NM_001286464 | BAIAP3     | 4422  | 4440 | 1            | 1    | -0.41          | -0.55           | 18                        | 17                                       | 3UTR         |
| hsa-miR-11400 | NM_003933    | BAIAP3     | 4519  | 4537 | 1            | 1    | -0.41          | -0.55           | 18                        | 17                                       | 3UTR         |
| hsa-miR-11400 | NM_001199096 | BAIAP3     | 4361  | 4379 | 1            | 1    | -0.41          | -0.55           | 18                        | 17                                       | 3UTR         |
| hsa-miR-11400 | NM_001199097 | BAIAP3     | 4371  | 4389 | 1            | 1    | -0.41          | -0.55           | 18                        | 17                                       | 3UTR         |
| hsa-miR-11400 | NM_001199098 | BAIAP3     | 4302  | 4320 | 1            | 1    | -0.41          | -0.55           | 18                        | 17                                       | 3UTR         |
| hsa-miR-11400 | NM_001199099 | BAIAP3     | 4287  | 4305 | 1            | 1    | -0.41          | -0.55           | 18                        | 17                                       | 3UTR         |

| mirnaid       | refseqid     | genesymbol | start | end  | binding<br>p | seed | phylopste<br>m | phylopflan<br>k | binding_region_lengt<br>h | longest_<br>consecut<br>ive_pairi<br>ngs | positio<br>n |
|---------------|--------------|------------|-------|------|--------------|------|----------------|-----------------|---------------------------|------------------------------------------|--------------|
| hsa-miR-11400 | NM_001289975 | BAZ2B      | 7032  | 7049 | 0.961538     | 1    | 2.74           | 3.06            | 17                        | 7                                        | 3UTR         |
| hsa-miR-11400 | NM_014417    | BBC3       | 1085  | 1106 | 1            | 1    | 0.89           | 1.11            | 21                        | 8                                        | 3UTR         |
| hsa-miR-11400 | NM_001127241 | BBC3       | 678   | 699  | 1            | 1    | 0.40           | 1.38            | 21                        | 8                                        | 3UTR         |
| hsa-miR-11400 | NM_198428    | BBS9       | 3334  | 3353 | 1            | 1    | -0.04          | 0.12            | 19                        | 8                                        | 3UTR         |
| hsa-miR-11400 | NM_001348036 | BBS9       | 3124  | 3143 | 1            | 1    | -0.04          | 0.12            | 19                        | 8                                        | 3UTR         |
| hsa-miR-11400 | NM_001008405 | BCAP29     | 2356  | 2383 | 1            | 1    | 0.45           | 0.16            | 19                        | 10                                       | 3UTR         |
| hsa-miR-11400 | NM_001178093 | BCAT1      | 4487  | 4506 | 1            | 1    | -0.17          | 0.00            | 19                        | 7                                        | 3UTR         |
| hsa-miR-11400 | NM_138622    | BCL2L11    | 904   | 941  | 1            | 1    | 1.76           | 0.67            | 37                        | 8                                        | 3UTR         |
| hsa-miR-11400 | NM_138623    | BCL2L11    | 724   | 761  | 1            | 1    | 1.76           | 0.67            | 37                        | 8                                        | 3UTR         |
| hsa-miR-11400 | NM_001204107 | BCL2L11    | 706   | 743  | 1            | 1    | 1.76           | 0.67            | 37                        | 8                                        | 3UTR         |
| hsa-miR-11400 | NM_001010922 | BCL2L15    | 1885  | 1904 | 1            | 1    | 0.17           | 0.29            | 19                        | 8                                        | 3UTR         |
| hsa-miR-11400 | NM_181844    | BCL6B      | 1961  | 1978 | 1            | 1    | 2.76           | 0.69            | 17                        | 8                                        | 3UTR         |
| hsa-miR-11400 | NM_001363659 | BCLAF1     | 3843  | 3859 | 1            | 1    | 0.16           | 0.34            | 16                        | 7                                        | 3UTR         |
| hsa-miR-11400 | NM_001136106 | BEAN1      | 961   | 990  | 1            | 1    | 0.03           | 0.02            | 22                        | 15                                       | 3UTR         |
| hsa-miR-11400 | NM_001178020 | BEAN1      | 1068  | 1097 | 1            | 1    | 0.03           | 0.02            | 22                        | 15                                       | 3UTR         |
| hsa-miR-11400 | NM_001367314 | BEND3      | 4632  | 4670 | 1            | 1    | 4.20           | 3.27            | 38                        | 10                                       | 3UTR         |
| hsa-miR-11400 | NM_001080450 | BEND3      | 4845  | 4883 | 1            | 1    | 2.45           | 3.19            | 38                        | 10                                       | 3UTR         |

| mirnaid       | refseqid     | genesymbol | start | end   | binding<br>p | seed | phylopste<br>m | phylopflan<br>k | binding_region_lengt<br>h | longest_<br>consecut<br>ive_pairi<br>ngs | positio<br>n |
|---------------|--------------|------------|-------|-------|--------------|------|----------------|-----------------|---------------------------|------------------------------------------|--------------|
| hsa-miR-11400 | NM_001711    | BGN        | 1292  | 1306  | 1            | 1    | -0.44          | -0.08           | 14                        | 13                                       | 3UTR         |
| hsa-miR-11400 | NM_001080512 | BICC1      | 3239  | 3264  | 1            | 1    | 1.46           | 1.85            | 25                        | 7                                        | 3UTR         |
| hsa-miR-11400 | NM_207311    | BICDL1     | 2862  | 2898  | 1            | 1    | 1.26           | 1.74            | 24                        | 14                                       | 3UTR         |
| hsa-miR-11400 | NM_182962    | BIRC3      | 3267  | 3286  | 1            | 1    | 0.32           | 0.06            | 19                        | 13                                       | 3UTR         |
| hsa-miR-11400 | NM_001165    | BIRC3      | 5827  | 5846  | 1            | 1    | 0.32           | 0.06            | 19                        | 13                                       | 3UTR         |
| hsa-miR-11400 | NM_001282436 | BLOC1S2    | 1431  | 1444  | 1            | 1    | 0.34           | 0.21            | 13                        | 6                                        | 3UTR         |
| hsa-miR-11400 | NM_173809    | BLOC1S2    | 1323  | 1336  | 1            | 1    | -0.49          | 0.04            | 13                        | 6                                        | 3UTR         |
| hsa-miR-11400 | XM_017008382 | BMP2K      | 3609  | 3653  | 1            | 1    | 0.00           | 0.00            | 44                        | 8                                        | 3UTR         |
| hsa-miR-11400 | NM_001201    | BMP3       | 3782  | 3809  | 1            | 1    | 0.00           | 0.00            | 27                        | 10                                       | 3UTR         |
| hsa-miR-11400 | XM_011540103 | BMPR1A     | 5758  | 5807  | 1            | 1    | 0.00           | 0.00            | 22                        | 6                                        | 3UTR         |
| hsa-miR-11400 | NM_001204    | BMPR2      | 11520 | 11545 | 1            | 1    | 0.00           | 0.00            | 21                        | 19                                       | 3UTR         |
| hsa-miR-11400 | NM_004330    | BNIP2      | 5722  | 5743  | 1            | 1    | 1.94           | 2.24            | 21                        | 9                                        | 3UTR         |
| hsa-miR-11400 | NM_001320675 | BNIP2      | 5731  | 5752  | 1            | 1    | 1.56           | 2.33            | 21                        | 9                                        | 3UTR         |
| hsa-miR-11400 | NM_001010903 | BNIP5      | 2944  | 2963  | 1            | 1    | 0.39           | -0.38           | 19                        | 14                                       | 3UTR         |
| hsa-miR-11400 | NM_138369    | BOD1       | 1131  | 1149  | 1            | 1    | -0.25          | 1.27            | 18                        | 12                                       | 3UTR         |
| hsa-miR-11400 | NM_001159651 | BOD1       | 934   | 952   | 1            | 1    | -0.20          | 0.27            | 18                        | 12                                       | 3UTR         |
| hsa-miR-11400 | NM_001300742 | BORCS5     | 5819  | 5836  | 1            | 1    | 0.00           | 0.00            | 17                        | 13                                       | 3UTR         |



| mirnaid       | refseqid     | genesymbol | start | end  | binding<br>p | seed | phylopste<br>m | phylopflan<br>k | binding_region_lengt<br>h | longest_<br>consecut<br>ive_pairi<br>ngs | positio<br>n |
|---------------|--------------|------------|-------|------|--------------|------|----------------|-----------------|---------------------------|------------------------------------------|--------------|
| hsa-miR-11400 | NM_001300742 | BORCS5     | 1321  | 1344 | 1            | 1    | 0.00           | 0.00            | 23                        | 12                                       | 3UTR         |
| hsa-miR-11400 | NM_058169    | BORCS5     | 6210  | 6227 | 1            | 1    | -0.25          | -0.05           | 17                        | 13                                       | 3UTR         |
| hsa-miR-11400 | NM_001330356 | BORCS5     | 6066  | 6083 | 1            | 1    | -0.25          | -0.05           | 17                        | 13                                       | 3UTR         |
| hsa-miR-11400 | NM_007299    | BRCA1      | 2659  | 2678 | 1            | 1    | 1.57           | 1.82            | 19                        | 8                                        | 3UTR         |
| hsa-miR-11400 | NM_007371    | BRD3       | 3340  | 3359 | 1            | 1    | 3.37           | 3.16            | 19                        | 16                                       | 3UTR         |
| hsa-miR-11400 | NM_023924    | BRD9       | 2161  | 2187 | 1            | 1    | 3.32           | 3.27            | 26                        | 9                                        | 3UTR         |
| hsa-miR-11400 | NM_023924    | BRD9       | 2240  | 2266 | 1            | 1    | 3.98           | 3.46            | 26                        | 9                                        | 3UTR         |
| hsa-miR-11400 | NM_001242790 | BRF1       | 1010  | 1032 | 1            | 1    | 0.00           | 0.00            | 22                        | 16                                       | 3UTR         |
| hsa-miR-11400 | NM_032043    | BRIP1      | 6442  | 6463 | 1            | 1    | 2.93           | 3.08            | 21                        | 8                                        | 3UTR         |
| hsa-miR-11400 | NM_015399    | BRMS1      | 1155  | 1197 | 0.961538     | 1    | 1.39           | 2.75            | 19                        | 8                                        | 3UTR         |
| hsa-miR-11400 | NM_001024957 | BRMS1      | 1073  | 1115 | 0.961538     | 1    | 1.39           | 2.75            | 19                        | 8                                        | 3UTR         |
| hsa-miR-11400 | XM_005249010 | BRPF3      | 3770  | 3814 | 1            | 1    | 0.00           | 0.00            | 44                        | 10                                       | 3UTR         |
| hsa-miR-11400 | NM_001347943 | BTBD11     | 4198  | 4220 | 1            | 1    | 2.33           | 1.52            | 22                        | 9                                        | 3UTR         |
| hsa-miR-11400 | NM_001017523 | BTBD11     | 2692  | 2714 | 1            | 1    | 2.33           | 1.52            | 22                        | 9                                        | 3UTR         |
| hsa-miR-11400 | NM_001018072 | BTBD11     | 4555  | 4577 | 1            | 1    | 2.33           | 1.52            | 22                        | 9                                        | 3UTR         |
| hsa-miR-11400 | NM_001289133 | BTBD7      | 4075  | 4095 | 1            | 1    | 0.54           | 0.74            | 20                        | 9                                        | 3UTR         |
| hsa-miR-11400 | NM_015237    | BTBD8      | 4219  | 4237 | 1            | 1    | 1.74           | 1.83            | 18                        | 8                                        | 3UTR         |

| mirnaid       | refseqid     | genesymbol | start | end  | binding<br>p | seed | phylopste<br>m | phylopflan<br>k | binding_region_lengt<br>h | longest_<br>consecut<br>ive_pairi<br>ngs | positio<br>n |
|---------------|--------------|------------|-------|------|--------------|------|----------------|-----------------|---------------------------|------------------------------------------|--------------|
| hsa-miR-11400 | NM_001281726 | BTD        | 9875  | 9897 | 1            | 1    | 0.37           | -0.01           | 22                        | 10                                       | 3UTR         |
| hsa-miR-11400 | NM_001037637 | BTF3       | 1129  | 1150 | 1            | 1    | 0.71           | 1.38            | 21                        | 9                                        | 3UTR         |
| hsa-miR-11400 | NM_152265    | BTF3L4     | 2348  | 2365 | 1            | 1    | -0.04          | 0.50            | 17                        | 9                                        | 3UTR         |
| hsa-miR-11400 | NM_001136497 | BTF3L4     | 2281  | 2298 | 1            | 1    | 0.68           | 1.05            | 17                        | 9                                        | 3UTR         |
| hsa-miR-11400 | NM_001243767 | BTF3L4     | 2146  | 2163 | 1            | 1    | 0.00           | 0.00            | 17                        | 9                                        | 3UTR         |
| hsa-miR-11400 | NM_001256856 | BTRC       | 1912  | 1935 | 1            | 1    | 2.35           | 2.75            | 23                        | 9                                        | 3UTR         |
| hsa-miR-11400 | NM_033637    | BTRC       | 1990  | 2013 | 1            | 1    | 2.05           | 2.07            | 23                        | 9                                        | 3UTR         |
| hsa-miR-11400 | NM_003939    | BTRC       | 1882  | 1905 | 1            | 1    | 2.05           | 2.07            | 23                        | 9                                        | 3UTR         |
| hsa-miR-11400 | NM_153714    | C10orf67   | 2364  | 2385 | 1            | 1    | 1.29           | 0.96            | 21                        | 7                                        | 3UTR         |
| hsa-miR-11400 | NM_001371909 | C10orf67   | 2170  | 2190 | 1            | 1    | 0.39           | 0.86            | 20                        | 9                                        | 3UTR         |
| hsa-miR-11400 | NM_001329958 | C11orf21   | 551   | 572  | 1            | 1    | -0.52          | -0.24           | 21                        | 10                                       | 3UTR         |
| hsa-miR-11400 | NM_001142946 | C11orf21   | 636   | 657  | 1            | 1    | -0.36          | -0.17           | 21                        | 10                                       | 3UTR         |
| hsa-miR-11400 | NM_173525    | C11orf42   | 1102  | 1121 | 1            | 1    | 1.65           | 2.00            | 19                        | 18                                       | 3UTR         |
| hsa-miR-11400 | NM_080659    | C11orf52   | 1054  | 1077 | 1            | 1    | 0.53           | 0.16            | 18                        | 10                                       | 3UTR         |
| hsa-miR-11400 | NM_031450    | C11orf68   | 1421  | 1460 | 1            | 1    | 0.58           | 1.06            | 39                        | 9                                        | 3UTR         |
| hsa-miR-11400 | NM_001135635 | C11orf68   | 1424  | 1463 | 1            | 1    | 0.58           | 1.03            | 39                        | 9                                        | 3UTR         |
| hsa-miR-11400 | NM_207645    | C11orf87   | 5661  | 5679 | 0.961538     | 1    | 0.91           | 0.56            | 18                        | 7                                        | 3UTR         |

| mirnaid       | refseqid     | genesymbol | start | end   | binding<br>p | seed | phylopste<br>m | phylopflan<br>k | binding_region_lengt<br>h | longest_<br>consecut<br>ive_pairi<br>ngs | positio<br>n |
|---------------|--------------|------------|-------|-------|--------------|------|----------------|-----------------|---------------------------|------------------------------------------|--------------|
| hsa-miR-11400 | NM_152318    | C12orf45   | 21097 | 21120 | 1            | 1    | 0.08           | 0.06            | 23                        | 11                                       | 3UTR         |
| hsa-miR-11400 | NM_152318    | C12orf45   | 10959 | 10982 | 1            | 1    | -0.07          | 0.01            | 23                        | 6                                        | 3UTR         |
| hsa-miR-11400 | XM_011537985 | C12orf50   | 2565  | 2584  | 0.961538     | 1    | 0.00           | 0.00            | 19                        | 13                                       | 3UTR         |
| hsa-miR-11400 | NM_001099676 | C12orf56   | 2694  | 2710  | 1            | 1    | 1.38           | 1.60            | 16                        | 15                                       | 3UTR         |
| hsa-miR-11400 | NM_001170633 | C12orf56   | 3174  | 3190  | 1            | 1    | 2.87           | 1.96            | 16                        | 15                                       | 3UTR         |
| hsa-miR-11400 | XM_017019916 | C12orf73   | 937   | 954   | 1            | 1    | 0.00           | 0.00            | 17                        | 8                                        | 3UTR         |
| hsa-miR-11400 | XM_017019917 | C12orf73   | 572   | 589   | 1            | 1    | 0.00           | 0.00            | 17                        | 8                                        | 3UTR         |
| hsa-miR-11400 | NM_001135570 | C12orf73   | 479   | 496   | 1            | 1    | 0.19           | 0.02            | 17                        | 8                                        | 3UTR         |
| hsa-miR-11400 | NM_001252507 | C14orf132  | 2421  | 2440  | 1            | 1    | -0.17          | -0.52           | 19                        | 18                                       | 3UTR         |
| hsa-miR-11400 | NM_001252507 | C14orf132  | 4703  | 4732  | 1            | 1    | -0.27          | -0.15           | 29                        | 11                                       | 3UTR         |
| hsa-miR-11400 | NM_001282463 | C14orf132  | 2520  | 2539  | 1            | 1    | -0.17          | -0.52           | 19                        | 18                                       | 3UTR         |
| hsa-miR-11400 | NM_001282463 | C14orf132  | 4802  | 4831  | 1            | 1    | -0.27          | -0.15           | 29                        | 11                                       | 3UTR         |
| hsa-miR-11400 | NM_001289139 | C14orf132  | 2514  | 2533  | 1            | 1    | -0.17          | -0.52           | 19                        | 18                                       | 3UTR         |
| hsa-miR-11400 | NM_001289139 | C14orf132  | 4796  | 4825  | 1            | 1    | -0.27          | -0.15           | 29                        | 11                                       | 3UTR         |
| hsa-miR-11400 | NM_025187    | C16orf70   | 1713  | 1731  | 1            | 1    | 1.56           | 1.56            | 18                        | 13                                       | 3UTR         |
| hsa-miR-11400 | NM_001320542 | C16orf70   | 1584  | 1602  | 1            | 1    | 1.56           | 1.56            | 18                        | 13                                       | 3UTR         |
| hsa-miR-11400 | NM_014117    | C16orf72   | 2097  | 2119  | 1            | 1    | 1.01           | 1.22            | 22                        | 7                                        | 3UTR         |

| mirnaid       | refseqid     | genesymbol | start | end  | binding<br>p | seed | phylopste<br>m | phylopflan<br>k | binding_region_lengt<br>h | longest_<br>consecut<br>ive_pairi<br>ngs | positio<br>n |
|---------------|--------------|------------|-------|------|--------------|------|----------------|-----------------|---------------------------|------------------------------------------|--------------|
| hsa-miR-11400 | NM_001348660 | C16orf87   | 5826  | 5849 | 1            | 1    | 2.16           | 2.08            | 23                        | 8                                        | 3UTR         |
| hsa-miR-11400 | NM_001105520 | C17orf100  | 841   | 855  | 1            | 1    | -0.36          | 0.45            | 14                        | 7                                        | 3UTR         |
| hsa-miR-11400 | NM_152460    | C17orf77   | 2050  | 2067 | 1            | 1    | 0.07           | 0.11            | 17                        | 16                                       | 3UTR         |
| hsa-miR-11400 | NM_145055    | C18orf25   | 4062  | 4083 | 1            | 1    | 0.01           | 0.22            | 21                        | 8                                        | 3UTR         |
| hsa-miR-11400 | NM_001008239 | C18orf25   | 3879  | 3900 | 1            | 1    | 0.12           | 0.26            | 21                        | 8                                        | 3UTR         |
| hsa-miR-11400 | NM_001199346 | C18orf32   | 4248  | 4297 | 1            | 1    | -0.15          | 0.00            | 26                        | 8                                        | 3UTR         |
| hsa-miR-11400 | NM_001282929 | C19orf12   | 1873  | 1892 | 1            | 1    | -0.33          | -0.59           | 19                        | 12                                       | 3UTR         |
| hsa-miR-11400 | NM_001282930 | C19orf12   | 1860  | 1879 | 1            | 1    | -0.38          | -0.46           | 19                        | 12                                       | 3UTR         |
| hsa-miR-11400 | NM_001136495 | C1orf198   | 2455  | 2470 | 1            | 1    | 0.35           | 0.42            | 15                        | 8                                        | 3UTR         |
| hsa-miR-11400 | NM_152374    | C1orf216   | 1302  | 1325 | 1            | 1    | 0.04           | -0.01           | 23                        | 13                                       | 3UTR         |
| hsa-miR-11400 | NM_001297717 | C1orf43    | 1213  | 1234 | 1            | 1    | 5.78           | 4.62            | 21                        | 12                                       | 3UTR         |
| hsa-miR-11400 | NM_001297720 | C1orf43    | 1272  | 1293 | 1            | 1    | 5.78           | 4.62            | 21                        | 12                                       | 3UTR         |
| hsa-miR-11400 | NM_001297721 | C1orf43    | 1019  | 1042 | 1            | 1    | 3.75           | 3.05            | 23                        | 8                                        | 3UTR         |
| hsa-miR-11400 | NM_138740    | C1orf43    | 1170  | 1191 | 1            | 1    | 2.75           | 3.00            | 21                        | 12                                       | 3UTR         |
| hsa-miR-11400 | NM_015449    | C1orf43    | 1224  | 1245 | 1            | 1    | 2.75           | 3.86            | 21                        | 12                                       | 3UTR         |
| hsa-miR-11400 | NM_001098616 | C1orf43    | 1326  | 1347 | 1            | 1    | 5.78           | 4.62            | 21                        | 12                                       | 3UTR         |
| hsa-miR-11400 | NM_024097    | C1orf50    | 4019  | 4041 | 1            | 1    | 0.36           | 0.03            | 22                        | 7                                        | 3UTR         |

| mirnaid       | refseqid     | genesymbol | start | end  | binding<br>p | seed | phylopste<br>m | phylopflan<br>k | binding_region_lengt<br>h | longest_<br>consecut<br>ive_pairi<br>ngs | positio<br>n |
|---------------|--------------|------------|-------|------|--------------|------|----------------|-----------------|---------------------------|------------------------------------------|--------------|
| hsa-miR-11400 | NM_001297642 | C1RL       | 1215  | 1250 | 1            | 1    | 0.38           | -0.06           | 35                        | 12                                       | 3UTR         |
| hsa-miR-11400 | NM_001009984 | C20orf194  | 4770  | 4789 | 1            | 1    | 3.11           | 2.50            | 19                        | 9                                        | 3UTR         |
| hsa-miR-11400 | XM_024451878 | C20orf203  | 2183  | 2202 | 1            | 1    | 0.00           | 0.00            | 19                        | 9                                        | 3UTR         |
| hsa-miR-11400 | NM_019596    | C21orf62   | 1932  | 1954 | 1            | 1    | -0.03          | -0.21           | 22                        | 9                                        | 3UTR         |
| hsa-miR-11400 | NM_001162496 | C21orf62   | 1851  | 1873 | 1            | 1    | -0.35          | 0.02            | 22                        | 9                                        | 3UTR         |
| hsa-miR-11400 | NM_001136263 | C2CD4C     | 2342  | 2362 | 1            | 1    | -0.04          | 0.95            | 20                        | 7                                        | 3UTR         |
| hsa-miR-11400 | NM_001013649 | C2orf68    | 2656  | 2680 | 1            | 1    | -0.05          | 0.16            | 24                        | 8                                        | 3UTR         |
| hsa-miR-11400 | NM_001162483 | C2orf83    | 618   | 654  | 1            | 1    | -0.12          | -0.08           | 19                        | 7                                        | 3UTR         |
| hsa-miR-11400 | NM_024616    | C3orf52    | 1082  | 1117 | 1            | 1    | -0.07          | -0.36           | 18                        | 12                                       | 3UTR         |
| hsa-miR-11400 | NM_001171747 | C3orf52    | 901   | 922  | 1            | 1    | 0.00           | 0.00            | 21                        | 9                                        | 3UTR         |
| hsa-miR-11400 | NM_001171747 | C3orf52    | 829   | 864  | 1            | 1    | 0.00           | 0.00            | 18                        | 12                                       | 3UTR         |
| hsa-miR-11400 | NM_001351622 | C3orf85    | 809   | 823  | 1            | 1    | 0.15           | 0.02            | 14                        | 13                                       | 3UTR         |
| hsa-miR-11400 | NM_001271749 | C5AR2      | 1360  | 1381 | 1            | 1    | 0.27           | 0.18            | 21                        | 9                                        | 3UTR         |
| hsa-miR-11400 | NM_018485    | C5AR2      | 1260  | 1281 | 1            | 1    | 0.27           | 0.18            | 21                        | 9                                        | 3UTR         |
| hsa-miR-11400 | NM_178569    | C5orf38    | 3904  | 3934 | 1            | 1    | 0.00           | 0.00            | 30                        | 11                                       | 3UTR         |
| hsa-miR-11400 | NM_175921    | C5orf51    | 3665  | 3683 | 1            | 1    | 0.13           | 0.59            | 18                        | 17                                       | 3UTR         |
| hsa-miR-11400 | NM_001286635 | C6orf89    | 3845  | 3864 | 0.980769     | 1    | -0.55          | 0.00            | 19                        | 14                                       | 3UTR         |

| mirnaid       | refseqid     | genesymbol | start | end  | binding<br>p | seed | phylopste<br>m | phylopflan<br>k | binding_region_lengt<br>h | longest_<br>consecut<br>ive_pairi<br>ngs | positio<br>n |
|---------------|--------------|------------|-------|------|--------------|------|----------------|-----------------|---------------------------|------------------------------------------|--------------|
| hsa-miR-11400 | NM_001286636 | C6orf89    | 4023  | 4042 | 0.980769     | 1    | -0.55          | 0.00            | 19                        | 14                                       | 3UTR         |
| hsa-miR-11400 | NM_152734    | C6orf89    | 3745  | 3764 | 0.980769     | 1    | -0.55          | 0.00            | 19                        | 14                                       | 3UTR         |
| hsa-miR-11400 | NM_023080    | C8orf33    | 1887  | 1920 | 0.961538     | 1    | 0.00           | -0.01           | 21                        | 11                                       | 3UTR         |
| hsa-miR-11400 | NM_152571    | C9orf163   | 2184  | 2201 | 1            | 1    | -0.41          | -0.75           | 17                        | 16                                       | 3UTR         |
| hsa-miR-11400 | NM_173520    | C9orf62    | 1678  | 1699 | 1            | 1    | -0.06          | -0.31           | 21                        | 11                                       | 3UTR         |
| hsa-miR-11400 | NM_001291968 | CA1        | 562   | 603  | 1            | 1    | -0.16          | 0.14            | 13                        | 11                                       | 3UTR         |
| hsa-miR-11400 | NM_001293642 | CA12       | 4511  | 4534 | 1            | 1    | 0.00           | 0.00            | 23                        | 8                                        | 3UTR         |
| hsa-miR-11400 | NM_206925    | CA12       | 4691  | 4714 | 1            | 1    | 0.00           | 0.00            | 23                        | 8                                        | 3UTR         |
| hsa-miR-11400 | NM_001218    | CA12       | 4724  | 4747 | 1            | 1    | 0.00           | 0.00            | 23                        | 8                                        | 3UTR         |
| hsa-miR-11400 | NM_004056    | CA8        | 2757  | 2773 | 1            | 1    | -0.69          | 0.20            | 16                        | 15                                       | 3UTR         |
| hsa-miR-11400 | NM_031215    | CABLES2    | 1467  | 1490 | 1            | 1    | -0.54          | 0.01            | 23                        | 9                                        | 3UTR         |
| hsa-miR-11400 | XM_005245478 | CACNA1S    | 5764  | 5806 | 1            | 1    | 0.00           | 0.00            | 20                        | 12                                       | 3UTR         |
| hsa-miR-11400 | XM_005252588 | CACNB2     | 6690  | 6709 | 1            | 1    | 0.00           | 0.00            | 19                        | 10                                       | 3UTR         |
| hsa-miR-11400 | XM_006717502 | CACNB2     | 6604  | 6623 | 1            | 1    | 0.00           | 0.00            | 19                        | 10                                       | 3UTR         |
| hsa-miR-11400 | NM_001206915 | CACNB3     | 2358  | 2382 | 1            | 1    | 0.89           | 0.46            | 24                        | 9                                        | 3UTR         |
| hsa-miR-11400 | NM_001206916 | CACNB3     | 2150  | 2181 | 1            | 1    | 0.00           | 0.00            | 25                        | 9                                        | 3UTR         |
| hsa-miR-11400 | NM_001330117 | CACNB4     | 6398  | 6415 | 0.953846     | 1    | 5.24           | 5.41            | 17                        | 13                                       | 3UTR         |

| mirnaid       | refseqid     | genesymbol | start | end  | binding<br>p | seed | phylopste<br>m | phylopflan<br>k | binding_region_lengt<br>h | longest_<br>consecut<br>ive_pairi<br>ngs | positio<br>n |
|---------------|--------------|------------|-------|------|--------------|------|----------------|-----------------|---------------------------|------------------------------------------|--------------|
| hsa-miR-11400 | NM_000726    | CACNB4     | 5962  | 5979 | 0.953846     | 1    | 4.86           | 4.36            | 17                        | 13                                       | 3UTR         |
| hsa-miR-11400 | NM_001005746 | CACNB4     | 5989  | 6006 | 0.953846     | 1    | 5.38           | 4.49            | 17                        | 13                                       | 3UTR         |
| hsa-miR-11400 | NM_001320722 | CACNB4     | 6252  | 6269 | 1            | 1    | 1.22           | 2.06            | 17                        | 13                                       | 3UTR         |
| hsa-miR-11400 | NM_001330116 | CACNB4     | 6063  | 6080 | 1            | 1    | 2.87           | 3.55            | 17                        | 13                                       | 3UTR         |
| hsa-miR-11400 | NM_000726    | CACNB4     | 5644  | 5664 | 1            | 1    | 1.64           | 1.54            | 20                        | 7                                        | 3UTR         |
| hsa-miR-11400 | NM_153810    | CACUL1     | 7767  | 7813 | 1            | 1    | 0.50           | 0.98            | 46                        | 15                                       | 3UTR         |
| hsa-miR-11400 | NM_153810    | CACUL1     | 6327  | 6346 | 1            | 1    | 0.45           | 0.24            | 19                        | 8                                        | 3UTR         |
| hsa-miR-11400 | NM_001301044 | CADM1      | 5799  | 5820 | 1            | 1    | 3.51           | 2.45            | 21                        | 13                                       | 3UTR         |
| hsa-miR-11400 | NM_001098517 | CADM1      | 5682  | 5703 | 1            | 1    | 0.49           | 1.14            | 21                        | 13                                       | 3UTR         |
| hsa-miR-11400 | NM_153184    | CADM2      | 2698  | 2716 | 1            | 1    | 4.80           | 4.19            | 16                        | 14                                       | 3UTR         |
| hsa-miR-11400 | NM_007088    | CALB2      | 916   | 955  | 1            | 1    | 0.76           | 0.22            | 24                        | 8                                        | 3UTR         |
| hsa-miR-11400 | NM_001740    | CALB2      | 1010  | 1049 | 1            | 1    | 0.75           | 0.07            | 24                        | 8                                        | 3UTR         |
| hsa-miR-11400 | NM_020898    | CALCOCO1   | 2465  | 2483 | 0.961538     | 1    | -0.80          | -0.39           | 13                        | 11                                       | 3UTR         |
| hsa-miR-11400 | NM_001143682 | CALCOCO1   | 2210  | 2228 | 0.961538     | 1    | -0.16          | -0.02           | 13                        | 11                                       | 3UTR         |
| hsa-miR-11400 | XM_017019707 | CALCOCO1   | 2603  | 2621 | 1            | 1    | 0.00           | 0.00            | 13                        | 11                                       | 3UTR         |
| hsa-miR-11400 | NM_001271751 | CALCRL     | 5571  | 5589 | 1            | 1    | 1.43           | 0.81            | 18                        | 8                                        | 3UTR         |
| hsa-miR-11400 | NM_001369434 | CALCRL     | 5804  | 5822 | 1            | 1    | 1.81           | 0.69            | 18                        | 8                                        | 3UTR         |

| mirnaid       | refseqid     | genesymbol | start | end  | binding<br>p | seed | phylopste<br>m | phylopflan<br>k | binding_region_lengt<br>h | longest_<br>consecut<br>ive_pairi<br>ngs | positio<br>n |
|---------------|--------------|------------|-------|------|--------------|------|----------------|-----------------|---------------------------|------------------------------------------|--------------|
| hsa-miR-11400 | NM_153711    | CALHM5     | 3438  | 3457 | 1            | 1    | -0.03          | -0.01           | 19                        | 9                                        | 3UTR         |
| hsa-miR-11400 | XM_017012678 | CALN1      | 3684  | 3701 | 1            | 1    | 0.00           | 0.00            | 17                        | 11                                       | 3UTR         |
| hsa-miR-11400 | NM_001363460 | CALN1      | 3164  | 3181 | 1            | 1    | 0.36           | 0.48            | 17                        | 11                                       | 3UTR         |
| hsa-miR-11400 | XM_005263396 | CAMSAP1    | 5426  | 5445 | 1            | 1    | 0.00           | 0.00            | 19                        | 8                                        | 3UTR         |
| hsa-miR-11400 | XM_005263397 | CAMSAP1    | 4527  | 4546 | 1            | 1    | 0.00           | 0.00            | 19                        | 8                                        | 3UTR         |
| hsa-miR-11400 | XM_006721478 | CAMTA2     | 4977  | 5030 | 0.974359     | 1    | 0.00           | 0.00            | 24                        | 11                                       | 3UTR         |
| hsa-miR-11400 | NM_001171167 | CAMTA2     | 4779  | 4832 | 0.974359     | 1    | 0.25           | 0.21            | 24                        | 11                                       | 3UTR         |
| hsa-miR-11400 | NM_001171168 | CAMTA2     | 4709  | 4762 | 0.974359     | 1    | 0.25           | 0.21            | 24                        | 11                                       | 3UTR         |
| hsa-miR-11400 | NM_018448    | CAND1      | 8404  | 8425 | 0.969231     | 1    | 0.16           | 0.14            | 21                        | 16                                       | 3UTR         |
| hsa-miR-11400 | NM_001748    | CAPN2      | 2535  | 2559 | 1            | 1    | 0.20           | 0.34            | 24                        | 8                                        | 3UTR         |
| hsa-miR-11400 | NM_001748    | CAPN2      | 2319  | 2338 | 1            | 1    | 0.43           | 0.59            | 19                        | 12                                       | 3UTR         |
| hsa-miR-11400 | NM_001146068 | CAPN2      | 2431  | 2455 | 1            | 1    | 0.11           | 0.41            | 24                        | 8                                        | 3UTR         |
| hsa-miR-11400 | NM_001146068 | CAPN2      | 2215  | 2234 | 1            | 1    | 0.65           | 0.54            | 19                        | 12                                       | 3UTR         |
| hsa-miR-11400 | NM_001385550 | CAPRN2     | 3112  | 3144 | 1            | 1    | 3.68           | 3.13            | 32                        | 9                                        | 3UTR         |
| hsa-miR-11400 | NM_014316    | CARHSP1    | 2530  | 2550 | 1            | 1    | 4.72           | 2.58            | 20                        | 9                                        | 3UTR         |
| hsa-miR-11400 | NM_007359    | CASC3      | 2166  | 2205 | 1            | 1    | 1.08           | 0.98            | 18                        | 10                                       | 3UTR         |
| hsa-miR-11400 | XM_011543994 | CASK       | 4201  | 4218 | 1            | 1    | 0.00           | 0.00            | 17                        | 16                                       | 3UTR         |



| mirnaid       | refseqid     | genesymbol | start | end  | binding<br>p | seed | phylopste<br>m | phylopflan<br>k | binding_region_lengt<br>h | longest_<br>consecut<br>ive_pairi<br>ngs | positio<br>n |
|---------------|--------------|------------|-------|------|--------------|------|----------------|-----------------|---------------------------|------------------------------------------|--------------|
| hsa-miR-11400 | XM_011543995 | CASK       | 4168  | 4185 | 1            | 1    | 0.00           | 0.00            | 17                        | 16                                       | 3UTR         |
| hsa-miR-11400 | XM_024452473 | CASK       | 3776  | 3793 | 1            | 1    | 0.00           | 0.00            | 17                        | 16                                       | 3UTR         |
| hsa-miR-11400 | NM_003688    | CASK       | 4170  | 4187 | 1            | 1    | 0.00           | 0.00            | 17                        | 16                                       | 3UTR         |
| hsa-miR-11400 | NM_001126054 | CASK       | 4101  | 4118 | 1            | 1    | 0.00           | 0.00            | 17                        | 16                                       | 3UTR         |
| hsa-miR-11400 | NM_001126055 | CASK       | 4098  | 4115 | 1            | 1    | 0.00           | 0.00            | 17                        | 16                                       | 3UTR         |
| hsa-miR-11400 | NM_020753    | CASKIN2    | 4612  | 4640 | 1            | 1    | 0.19           | 0.30            | 28                        | 9                                        | 3UTR         |
| hsa-miR-11400 | NM_032983    | CASP2      | 661   | 683  | 1            | 1    | 2.01           | 2.88            | 22                        | 10                                       | 3UTR         |
| hsa-miR-11400 | NM_001267056 | CASP7      | 1070  | 1095 | 1            | 1    | 5.04           | 1.67            | 25                        | 11                                       | 3UTR         |
| hsa-miR-11400 | NM_001227    | CASP7      | 981   | 1006 | 1            | 1    | 3.31           | 2.99            | 25                        | 11                                       | 3UTR         |
| hsa-miR-11400 | NM_000388    | CASR       | 7078  | 7098 | 1            | 1    | 0.00           | 0.20            | 20                        | 11                                       | 3UTR         |
| hsa-miR-11400 | NM_000388    | CASR       | 7758  | 7776 | 1            | 1    | 0.09           | 0.25            | 18                        | 12                                       | 3UTR         |
| hsa-miR-11400 | NM_001178065 | CASR       | 7166  | 7186 | 1            | 1    | 0.00           | 0.20            | 20                        | 11                                       | 3UTR         |
| hsa-miR-11400 | NM_001284212 | CAST       | 2829  | 2846 | 1            | 1    | 0.42           | 0.76            | 17                        | 16                                       | 3UTR         |
| hsa-miR-11400 | NM_001284213 | CAST       | 2739  | 2756 | 1            | 1    | 0.42           | 0.76            | 17                        | 16                                       | 3UTR         |
| hsa-miR-11400 | NM_173060    | CAST       | 2889  | 2906 | 1            | 1    | 0.42           | 0.76            | 17                        | 16                                       | 3UTR         |
| hsa-miR-11400 | NM_001330630 | CAST       | 2790  | 2807 | 1            | 1    | 0.42           | 0.76            | 17                        | 16                                       | 3UTR         |
| hsa-miR-11400 | NM_001330631 | CAST       | 2916  | 2933 | 1            | 1    | 0.42           | 0.76            | 17                        | 16                                       | 3UTR         |

| mirnaid       | refseqid     | genesymbol | start | end   | binding<br>p | seed | phylopste<br>m | phylopflan<br>k | binding_region_lengt<br>h | longest_<br>consecut<br>ive_pairi<br>ngs | positio<br>n |
|---------------|--------------|------------|-------|-------|--------------|------|----------------|-----------------|---------------------------|------------------------------------------|--------------|
| hsa-miR-11400 | NM_001330634 | CAST       | 2859  | 2876  | 1            | 1    | 0.42           | 0.76            | 17                        | 16                                       | 3UTR         |
| hsa-miR-11400 | NM_001042443 | CAST       | 2955  | 2972  | 1            | 1    | 0.42           | 0.76            | 17                        | 16                                       | 3UTR         |
| hsa-miR-11400 | NM_001042444 | CAST       | 2832  | 2849  | 1            | 1    | 0.42           | 0.76            | 17                        | 16                                       | 3UTR         |
| hsa-miR-11400 | NM_001042445 | CAST       | 2850  | 2867  | 1            | 1    | 0.42           | 0.76            | 17                        | 16                                       | 3UTR         |
| hsa-miR-11400 | XM_017007395 | CBLB       | 5413  | 5434  | 1            | 1    | 0.00           | 0.00            | 21                        | 8                                        | 3UTR         |
| hsa-miR-11400 | NM_012117    | CBX5       | 10384 | 10404 | 1            | 1    | 1.18           | 0.89            | 20                        | 10                                       | 3UTR         |
| hsa-miR-11400 | NM_001127321 | CBX5       | 10347 | 10367 | 1            | 1    | 0.61           | 1.22            | 20                        | 10                                       | 3UTR         |
| hsa-miR-11400 | NM_001127322 | CBX5       | 10545 | 10565 | 1            | 1    | 1.12           | 1.50            | 20                        | 10                                       | 3UTR         |
| hsa-miR-11400 | NM_020649    | CBX8       | 2760  | 2778  | 1            | 1    | 0.61           | 1.13            | 18                        | 17                                       | 3UTR         |
| hsa-miR-11400 | NM_001282959 | CCAR1      | 4239  | 4258  | 1            | 1    | 0.07           | -0.20           | 19                        | 15                                       | 3UTR         |
| hsa-miR-11400 | NM_001282960 | CCAR1      | 4233  | 4252  | 1            | 1    | 0.07           | -0.20           | 19                        | 15                                       | 3UTR         |
| hsa-miR-11400 | NM_018237    | CCAR1      | 4278  | 4297  | 1            | 1    | 0.07           | -0.20           | 19                        | 15                                       | 3UTR         |
| hsa-miR-11400 | NM_001258395 | CCDC103    | 2008  | 2039  | 1            | 1    | 4.16           | 2.80            | 16                        | 14                                       | 3UTR         |
| hsa-miR-11400 | NM_001258396 | CCDC103    | 2022  | 2053  | 1            | 1    | 4.16           | 2.80            | 16                        | 14                                       | 3UTR         |
| hsa-miR-11400 | NM_213607    | CCDC103    | 2038  | 2069  | 1            | 1    | 4.16           | 2.80            | 16                        | 14                                       | 3UTR         |
| hsa-miR-11400 | NM_001271835 | CCDC120    | 2779  | 2797  | 1            | 1    | 0.00           | 0.00            | 18                        | 10                                       | 3UTR         |
| hsa-miR-11400 | NM_033626    | CCDC120    | 2720  | 2738  | 1            | 1    | 0.00           | 0.00            | 18                        | 10                                       | 3UTR         |

| mirnaid       | refseqid     | genesymbol | start | end  | binding<br>p | seed | phylopste<br>m | phylopflan<br>k | binding_region_lengt<br>h | longest_<br>consecut<br>ive_pairi<br>ngs | positio<br>n |
|---------------|--------------|------------|-------|------|--------------|------|----------------|-----------------|---------------------------|------------------------------------------|--------------|
| hsa-miR-11400 | NM_001304797 | CCDC134    | 5137  | 5157 | 1            | 1    | -0.31          | -0.09           | 20                        | 10                                       | 3UTR         |
| hsa-miR-11400 | NM_024821    | CCDC134    | 5476  | 5496 | 1            | 1    | -0.31          | -0.09           | 20                        | 10                                       | 3UTR         |
| hsa-miR-11400 | NM_138803    | CCDC148    | 2958  | 2993 | 1            | 1    | 0.53           | 0.31            | 16                        | 14                                       | 3UTR         |
| hsa-miR-11400 | NM_001318335 | CCDC157    | 1658  | 1706 | 1            | 1    | -0.04          | 0.12            | 48                        | 8                                        | 3UTR         |
| hsa-miR-11400 | XM_017006554 | CCDC174    | 2029  | 2051 | 1            | 1    | 0.00           | 0.00            | 22                        | 8                                        | 3UTR         |
| hsa-miR-11400 | NM_018017    | CCDC186    | 6118  | 6140 | 1            | 1    | 3.47           | 3.50            | 22                        | 10                                       | 3UTR         |
| hsa-miR-11400 | NM_001378188 | CCDC187    | 7403  | 7422 | 1            | 1    | 0.17           | 0.40            | 19                        | 15                                       | 3UTR         |
| hsa-miR-11400 | NM_001283056 | CCDC198    | 2082  | 2105 | 1            | 1    | 1.86           | 0.89            | 23                        | 8                                        | 3UTR         |
| hsa-miR-11400 | NM_015439    | CCDC28A    | 951   | 973  | 1            | 1    | -0.42          | 1.04            | 22                        | 11                                       | 3UTR         |
| hsa-miR-11400 | NM_001382438 | CCDC32     | 1462  | 1511 | 1            | 1    | 5.31           | 4.10            | 26                        | 8                                        | 3UTR         |
| hsa-miR-11400 | NM_001143829 | CCDC68     | 1882  | 1924 | 1            | 1    | 0.14           | 0.03            | 31                        | 15                                       | 3UTR         |
| hsa-miR-11400 | XM_024448693 | CCDC82     | 3164  | 3182 | 1            | 1    | 0.00           | 0.00            | 18                        | 9                                        | 3UTR         |
| hsa-miR-11400 | XM_005264421 | CCDC88A    | 6342  | 6377 | 1            | 1    | 0.00           | 0.00            | 35                        | 10                                       | 3UTR         |
| hsa-miR-11400 | XM_011532968 | CCDC88A    | 6201  | 6236 | 1            | 1    | 0.00           | 0.00            | 35                        | 10                                       | 3UTR         |
| hsa-miR-11400 | NM_053056    | CCND1      | 4053  | 4071 | 1            | 1    | 1.14           | 0.94            | 18                        | 14                                       | 3UTR         |
| hsa-miR-11400 | NM_001759    | CCND2      | 2442  | 2461 | 1            | 1    | 0.59           | 1.02            | 19                        | 8                                        | 3UTR         |
| hsa-miR-11400 | NM_004354    | CCNG2      | 5195  | 5217 | 1            | 1    | 0.01           | 0.13            | 22                        | 7                                        | 3UTR         |

| mirnaid       | refseqid     | genesymbol | start | end  | binding<br>p | seed | phylopste<br>m | phylopflan<br>k | binding_region_lengt<br>h | longest_<br>consecut<br>ive_pairi<br>ngs | positio<br>n |
|---------------|--------------|------------|-------|------|--------------|------|----------------|-----------------|---------------------------|------------------------------------------|--------------|
| hsa-miR-11400 | NM_001363539 | CCNH       | 1614  | 1632 | 1            | 1    | 1.86           | 1.75            | 18                        | 6                                        | 3UTR         |
| hsa-miR-11400 | NM_019084    | CCNJ       | 3300  | 3332 | 1            | 1    | 2.96           | 2.58            | 32                        | 8                                        | 3UTR         |
| hsa-miR-11400 | NM_001134375 | CCNJ       | 3333  | 3365 | 1            | 1    | 2.96           | 2.58            | 32                        | 8                                        | 3UTR         |
| hsa-miR-11400 | NM_001134376 | CCNJ       | 3297  | 3329 | 1            | 1    | 2.96           | 2.58            | 32                        | 8                                        | 3UTR         |
| hsa-miR-11400 | NM_014711    | CCP110     | 4394  | 4413 | 1            | 1    | -0.14          | 0.11            | 19                        | 10                                       | 3UTR         |
| hsa-miR-11400 | NM_001323572 | CCP110     | 4251  | 4270 | 1            | 1    | -0.14          | 0.11            | 19                        | 10                                       | 3UTR         |
| hsa-miR-11400 | NM_001199022 | CCP110     | 4337  | 4356 | 1            | 1    | -0.14          | 0.11            | 19                        | 10                                       | 3UTR         |
| hsa-miR-11400 | NM_001145065 | CCSER1     | 5046  | 5071 | 1            | 1    | 0.09           | 0.54            | 25                        | 7                                        | 3UTR         |
| hsa-miR-11400 | NM_006016    | CD164      | 2716  | 2735 | 1            | 1    | 0.17           | 0.97            | 19                        | 7                                        | 3UTR         |
| hsa-miR-11400 | NM_001142401 | CD164      | 2677  | 2696 | 1            | 1    | 0.17           | 0.97            | 19                        | 7                                        | 3UTR         |
| hsa-miR-11400 | NM_001142402 | CD164      | 2659  | 2678 | 1            | 1    | 0.17           | 0.97            | 19                        | 7                                        | 3UTR         |
| hsa-miR-11400 | NM_001142403 | CD164      | 2120  | 2139 | 1            | 1    | 0.17           | 0.97            | 19                        | 7                                        | 3UTR         |
| hsa-miR-11400 | NM_001142404 | CD164      | 2024  | 2043 | 1            | 1    | 0.17           | 0.97            | 19                        | 7                                        | 3UTR         |
| hsa-miR-11400 | XM_011510119 | CD1B       | 1238  | 1273 | 1            | 1    | 0.00           | 0.00            | 18                        | 11                                       | 3UTR         |
| hsa-miR-11400 | XM_011512194 | CD28       | 1939  | 1957 | 1            | 1    | 0.00           | 0.00            | 18                        | 11                                       | 3UTR         |
| hsa-miR-11400 | NM_006139    | CD28       | 1940  | 1958 | 1            | 1    | 0.15           | -0.09           | 18                        | 11                                       | 3UTR         |
| hsa-miR-11400 | NM_001243078 | CD28       | 1583  | 1601 | 1            | 1    | 0.00           | 0.00            | 18                        | 11                                       | 3UTR         |

| mirnaid       | refseqid     | genesymbol | start | end  | binding<br>p | seed | phylopste<br>m | phylopflan<br>k | binding_region_lengt<br>h | longest_<br>consecut<br>ive_pairi<br>ngs | positio<br>n |
|---------------|--------------|------------|-------|------|--------------|------|----------------|-----------------|---------------------------|------------------------------------------|--------------|
| hsa-miR-11400 | NM_006110    | CD2BP2     | 1842  | 1861 | 1            | 1    | 0.29           | -0.31           | 19                        | 10                                       | 3UTR         |
| hsa-miR-11400 | NM_001243646 | CD2BP2     | 1972  | 1991 | 1            | 1    | -0.07          | -0.17           | 19                        | 10                                       | 3UTR         |
| hsa-miR-11400 | NM_001775    | CD38       | 5509  | 5533 | 1            | 1    | 0.23           | 0.05            | 24                        | 7                                        | 3UTR         |
| hsa-miR-11400 | NM_000616    | CD4        | 2143  | 2167 | 1            | 1    | -0.79          | -0.23           | 24                        | 10                                       | 3UTR         |
| hsa-miR-11400 | NM_000074    | CD40LG     | 1615  | 1632 | 1            | 1    | 0.57           | 0.40            | 17                        | 8                                        | 3UTR         |
| hsa-miR-11400 | NM_203329    | CD59       | 1125  | 1159 | 1            | 1    | 0.48           | -0.10           | 23                        | 9                                        | 3UTR         |
| hsa-miR-11400 | NM_203330    | CD59       | 1226  | 1260 | 1            | 1    | 0.26           | -0.02           | 23                        | 9                                        | 3UTR         |
| hsa-miR-11400 | NM_001127223 | CD59       | 1231  | 1265 | 1            | 1    | 0.10           | 0.06            | 23                        | 9                                        | 3UTR         |
| hsa-miR-11400 | NM_001127225 | CD59       | 1124  | 1158 | 1            | 1    | 0.45           | -0.13           | 23                        | 9                                        | 3UTR         |
| hsa-miR-11400 | NM_001254750 | CD6        | 2559  | 2577 | 1            | 1    | 0.22           | -0.38           | 18                        | 15                                       | 3UTR         |
| hsa-miR-11400 | NM_001254751 | CD6        | 2532  | 2550 | 1            | 1    | 0.22           | -0.38           | 18                        | 15                                       | 3UTR         |
| hsa-miR-11400 | NM_006725    | CD6        | 2760  | 2778 | 1            | 1    | 0.22           | -0.38           | 18                        | 15                                       | 3UTR         |
| hsa-miR-11400 | NM_012072    | CD93       | 3500  | 3516 | 1            | 1    | -0.57          | -0.34           | 16                        | 15                                       | 3UTR         |
| hsa-miR-11400 | NM_001270436 | CDC42EP3   | 3663  | 3703 | 1            | 1    | 0.64           | 1.12            | 40                        | 7                                        | 3UTR         |
| hsa-miR-11400 | NM_001270438 | CDC42EP3   | 3695  | 3735 | 1            | 1    | 0.75           | 1.69            | 40                        | 7                                        | 3UTR         |
| hsa-miR-11400 | NM_006449    | CDC42EP3   | 3777  | 3817 | 1            | 1    | 0.82           | 1.23            | 40                        | 7                                        | 3UTR         |
| hsa-miR-11400 | NM_020239    | CDC42SE1   | 851   | 903  | 1            | 1    | 0.14           | -0.23           | 21                        | 8                                        | 3UTR         |

| mirnaid       | refseqid     | genesymbol | start | end   | binding<br>p | seed | phylopste<br>m | phylopflan<br>k | binding_region_lengt<br>h | longest_<br>consecut<br>ive_pairi<br>ngs | positio<br>n |
|---------------|--------------|------------|-------|-------|--------------|------|----------------|-----------------|---------------------------|------------------------------------------|--------------|
| hsa-miR-11400 | NM_001220488 | CDH13      | 4595  | 4613  | 1            | 1    | 0.51           | 0.60            | 18                        | 7                                        | 3UTR         |
| hsa-miR-11400 | NM_001220488 | CDH13      | 7213  | 7230  | 1            | 1    | 0.00           | 0.00            | 17                        | 10                                       | 3UTR         |
| hsa-miR-11400 | NM_001271028 | CDH19      | 4713  | 4737  | 1            | 1    | 2.23           | 2.15            | 24                        | 9                                        | 3UTR         |
| hsa-miR-11400 | NM_021153    | CDH19      | 5083  | 5107  | 1            | 1    | 2.23           | 2.15            | 24                        | 9                                        | 3UTR         |
| hsa-miR-11400 | NM_031891    | CDH20      | 3310  | 3331  | 1            | 1    | 0.32           | 0.18            | 21                        | 15                                       | 3UTR         |
| hsa-miR-11400 | NM_177980    | CDH26      | 4270  | 4285  | 1            | 1    | 0.00           | 0.02            | 15                        | 14                                       | 3UTR         |
| hsa-miR-11400 | NM_021810    | CDH26      | 2162  | 2177  | 1            | 1    | 0.00           | 0.02            | 15                        | 14                                       | 3UTR         |
| hsa-miR-11400 | NM_001348204 | CDH26      | 2039  | 2054  | 1            | 1    | 0.00           | 0.02            | 15                        | 14                                       | 3UTR         |
| hsa-miR-11400 | XM_005255760 | CDH8       | 9152  | 9195  | 1            | 1    | 0.00           | 0.00            | 43                        | 11                                       | 3UTR         |
| hsa-miR-11400 | NM_001796    | CDH8       | 4722  | 4741  | 1            | 1    | 0.67           | 2.59            | 19                        | 10                                       | 3UTR         |
| hsa-miR-11400 | NM_033100    | CDHR1      | 4627  | 4643  | 1            | 1    | -0.15          | 0.11            | 16                        | 15                                       | 3UTR         |
| hsa-miR-11400 | NM_033018    | CDK16      | 2497  | 2515  | 1            | 1    | 1.92           | 1.62            | 18                        | 14                                       | 3UTR         |
| hsa-miR-11400 | NM_006201    | CDK16      | 2560  | 2578  | 1            | 1    | 1.92           | 1.62            | 18                        | 14                                       | 3UTR         |
| hsa-miR-11400 | NM_001170460 | CDK16      | 2396  | 2414  | 1            | 1    | 2.86           | 1.21            | 18                        | 14                                       | 3UTR         |
| hsa-miR-11400 | XM_017014561 | CDK20      | 1450  | 1475  | 1            | 1    | 0.00           | 0.00            | 25                        | 10                                       | 3UTR         |
| hsa-miR-11400 | NM_001323289 | CDKL5      | 11690 | 11714 | 1            | 1    | 0.00           | 0.05            | 24                        | 8                                        | 3UTR         |
| hsa-miR-11400 | NM_001323289 | CDKL5      | 14210 | 14231 | 1            | 1    | 0.24           | 0.51            | 21                        | 8                                        | 3UTR         |

| mirnaid       | refseqid         | genesymbol | start | end  | binding<br>p | seed | phylopste<br>m | phylopflan<br>k | binding_region_lengt<br>h | longest_<br>consecut<br>ive_pairi<br>ngs | positio<br>n |
|---------------|------------------|------------|-------|------|--------------|------|----------------|-----------------|---------------------------|------------------------------------------|--------------|
| hsa-miR-11400 | NM_004936        | CDKN2B     | 1482  | 1499 | 1            | 1    | -0.38          | -0.01           | 17                        | 16                                       | 3UTR         |
| hsa-miR-11400 | NM_001263        | CDS1       | 3539  | 3555 | 1            | 1    | -0.23          | 0.01            | 16                        | 11                                       | 3UTR         |
| hsa-miR-11400 | NM_00128276<br>5 | CDV3       | 873   | 894  | 1            | 1    | 1.51           | 0.50            | 21                        | 14                                       | 3UTR         |
| hsa-miR-11400 | NM_00113442<br>2 | CDV3       | 1158  | 1179 | 1            | 1    | 1.51           | 0.50            | 21                        | 14                                       | 3UTR         |
| hsa-miR-11400 | NM_00113442<br>3 | CDV3       | 715   | 736  | 1            | 1    | 1.51           | 0.50            | 21                        | 14                                       | 3UTR         |
| hsa-miR-11400 | NM_001804        | CDX1       | 1630  | 1648 | 1            | 1    | 0.26           | 0.52            | 18                        | 9                                        | 3UTR         |
| hsa-miR-11400 | NM_002483        | CEACAM6    | 1644  | 1673 | 1            | 1    | 0.05           | -0.05           | 29                        | 9                                        | 3UTR         |
| hsa-miR-11400 | NM_006561        | CELF2      | 7486  | 7509 | 1            | 1    | 2.19           | 2.98            | 23                        | 10                                       | 3UTR         |
| hsa-miR-11400 | NM_00117267<br>3 | CELF5      | 2310  | 2339 | 1            | 1    | -0.82          | -0.38           | 29                        | 9                                        | 3UTR         |
| hsa-miR-11400 | NM_001810        | CENPB      | 2140  | 2159 | 0.978022     | 1    | -0.10          | 0.15            | 19                        | 9                                        | 3UTR         |
| hsa-miR-11400 | NM_018451        | CENPJ      | 4521  | 4539 | 1            | 1    | 0.22           | 1.41            | 18                        | 6                                        | 3UTR         |
| hsa-miR-11400 | NM_00127047<br>3 | CENPN      | 2558  | 2582 | 1            | 1    | 0.14           | 0.03            | 24                        | 12                                       | 3UTR         |
| hsa-miR-11400 | NM_00127047<br>4 | CENPN      | 2516  | 2540 | 1            | 1    | 0.14           | 0.03            | 24                        | 12                                       | 3UTR         |
| hsa-miR-11400 | NM_00110062<br>4 | CENPN      | 2618  | 2642 | 1            | 1    | 0.14           | 0.03            | 24                        | 12                                       | 3UTR         |
| hsa-miR-11400 | NM_00119980<br>3 | CENPO      | 3385  | 3404 | 1            | 1    | 0.00           | 0.00            | 19                        | 7                                        | 3UTR         |
| hsa-miR-11400 | NM_00101226<br>7 | CENPP      | 7871  | 7890 | 1            | 1    | -0.51          | -0.49           | 19                        | 10                                       | 3UTR         |
| hsa-miR-11400 | NM_00104015<br>7 | CEP44      | 2345  | 2369 | 1            | 1    | 0.13           | 0.67            | 15                        | 13                                       | 3UTR         |

| mirnaid       | refseqid     | genesymbol | start | end  | binding<br>p | seed | phylopste<br>m | phylopflan<br>k | binding_region_lengt<br>h | longest_<br>consecut<br>ive_pairi<br>ngs | positio<br>n |
|---------------|--------------|------------|-------|------|--------------|------|----------------|-----------------|---------------------------|------------------------------------------|--------------|
| hsa-miR-11400 | NM_001145314 | CEP44      | 2552  | 2574 | 1            | 1    | 0.35           | 0.33            | 22                        | 9                                        | 3UTR         |
| hsa-miR-11400 | NM_016122    | CEP83      | 2924  | 2938 | 1            | 1    | 3.33           | 2.98            | 14                        | 7                                        | 3UTR         |
| hsa-miR-11400 | NM_001042399 | CEP83      | 2871  | 2885 | 1            | 1    | 0.62           | 0.14            | 14                        | 7                                        | 3UTR         |
| hsa-miR-11400 | NM_022766    | CERK       | 2488  | 2514 | 1            | 1    | -0.39          | -0.37           | 26                        | 10                                       | 3UTR         |
| hsa-miR-11400 | NM_001164496 | CFAP44     | 9763  | 9781 | 1            | 1    | 4.03           | 2.14            | 18                        | 12                                       | 3UTR         |
| hsa-miR-11400 | NM_001348523 | CFAP92     | 3393  | 3419 | 1            | 1    | 0.00           | 0.00            | 17                        | 6                                        | 3UTR         |
| hsa-miR-11400 | NM_021023    | CFHR3      | 1635  | 1653 | 1            | 1    | 0.34           | 0.26            | 18                        | 12                                       | 3UTR         |
| hsa-miR-11400 | NM_001166624 | CFHR3      | 1452  | 1470 | 1            | 1    | 0.00           | 0.00            | 18                        | 12                                       | 3UTR         |
| hsa-miR-11400 | NM_003879    | CFLAR      | 5537  | 5557 | 1            | 1    | 0.04           | -0.13           | 20                        | 16                                       | 3UTR         |
| hsa-miR-11400 | NM_001351590 | CFLAR      | 6376  | 6396 | 1            | 1    | 0.04           | -0.13           | 20                        | 16                                       | 3UTR         |
| hsa-miR-11400 | NM_001127183 | CFLAR      | 5405  | 5425 | 1            | 1    | 0.04           | -0.13           | 20                        | 16                                       | 3UTR         |
| hsa-miR-11400 | NM_001202516 | CFLAR      | 5432  | 5452 | 1            | 1    | 2.10           | 2.36            | 20                        | 16                                       | 3UTR         |
| hsa-miR-11400 | NM_001202517 | CFLAR      | 5119  | 5139 | 1            | 1    | -0.26          | 0.04            | 20                        | 16                                       | 3UTR         |
| hsa-miR-11400 | NM_001202518 | CFLAR      | 4764  | 4807 | 1            | 1    | 0.25           | 0.00            | 26                        | 8                                        | 3UTR         |
| hsa-miR-11400 | XM_011513235 | CHCHD6     | 3742  | 3759 | 1            | 1    | 0.00           | 0.00            | 17                        | 10                                       | 3UTR         |
| hsa-miR-11400 | NM_001271    | CHD2       | 7772  | 7795 | 1            | 1    | -0.44          | -0.52           | 23                        | 8                                        | 3UTR         |
| hsa-miR-11400 | NM_001161346 | CHFR       | 5436  | 5455 | 1            | 1    | 0.16           | -0.08           | 19                        | 8                                        | 3UTR         |



| mirnaid       | refseqid     | genesymbol | start | end  | binding<br>p | seed | phylopste<br>m | phylopflan<br>k | binding_region_lengt<br>h | longest_<br>consecut<br>ive_pairi<br>ngs | positio<br>n |
|---------------|--------------|------------|-------|------|--------------|------|----------------|-----------------|---------------------------|------------------------------------------|--------------|
| hsa-miR-11400 | NM_023947    | CHID1      | 2007  | 2030 | 1            | 1    | 2.05           | 0.59            | 23                        | 11                                       | 3UTR         |
| hsa-miR-11400 | NM_001142676 | CHID1      | 2082  | 2105 | 1            | 1    | 2.09           | 1.07            | 23                        | 11                                       | 3UTR         |
| hsa-miR-11400 | NM_001253387 | CHL1       | 4468  | 4487 | 1            | 1    | 0.21           | 0.46            | 19                        | 11                                       | 3UTR         |
| hsa-miR-11400 | NM_001253388 | CHL1       | 3976  | 3995 | 1            | 1    | 0.17           | 0.64            | 19                        | 11                                       | 3UTR         |
| hsa-miR-11400 | NM_006614    | CHL1       | 4516  | 4535 | 1            | 1    | 0.17           | 0.64            | 19                        | 11                                       | 3UTR         |
| hsa-miR-11400 | NM_000748    | CHRNA2     | 2037  | 2071 | 1            | 1    | 0.01           | -0.48           | 21                        | 9                                        | 3UTR         |
| hsa-miR-11400 | NM_005199    | CHRNA1     | 2880  | 2913 | 1            | 1    | 0.20           | 0.08            | 21                        | 14                                       | 3UTR         |
| hsa-miR-11400 | NM_014863    | CHST15     | 3301  | 3317 | 1            | 1    | -0.21          | 0.56            | 16                        | 15                                       | 3UTR         |
| hsa-miR-11400 | NM_004273    | CHST3      | 3466  | 3486 | 1            | 1    | -0.15          | 0.10            | 20                        | 7                                        | 3UTR         |
| hsa-miR-11400 | NM_021615    | CHST6      | 3988  | 4009 | 0.953846     | 1    | -0.13          | 0.02            | 21                        | 12                                       | 3UTR         |
| hsa-miR-11400 | XM_005255955 | CHST6      | 2531  | 2560 | 0.969231     | 1    | 0.00           | 0.00            | 20                        | 18                                       | 3UTR         |
| hsa-miR-11400 | NM_021615    | CHST6      | 2386  | 2415 | 0.969231     | 1    | -0.31          | 0.03            | 20                        | 18                                       | 3UTR         |
| hsa-miR-11400 | NM_001040146 | CHTF8      | 2358  | 2385 | 1            | 1    | 2.61           | 1.70            | 20                        | 11                                       | 3UTR         |
| hsa-miR-11400 | NM_001277764 | CIB1       | 996   | 1019 | 1            | 1    | 0.34           | 0.57            | 23                        | 14                                       | 3UTR         |
| hsa-miR-11400 | NM_198491    | CIBAR2     | 1439  | 1457 | 1            | 1    | 2.61           | 2.14            | 18                        | 7                                        | 3UTR         |
| hsa-miR-11400 | XM_006713717 | CIP2A      | 7447  | 7461 | 1            | 1    | 0.00           | 0.00            | 14                        | 13                                       | 3UTR         |
| hsa-miR-11400 | NM_033426    | CIPC       | 1528  | 1548 | 1            | 1    | -0.09          | 0.31            | 20                        | 15                                       | 3UTR         |

| mirnaid       | refseqid     | genesymbol | start | end  | binding<br>p | seed | phylopste<br>m | phylopflan<br>k | binding_region_lengt<br>h | longest_<br>consecut<br>ive_pairi<br>ngs | positio<br>n |
|---------------|--------------|------------|-------|------|--------------|------|----------------|-----------------|---------------------------|------------------------------------------|--------------|
| hsa-miR-11400 | NM_015127    | CLCC1      | 2228  | 2245 | 1            | 1    | 0.13           | 0.08            | 17                        | 8                                        | 3UTR         |
| hsa-miR-11400 | NM_001377458 | CLCC1      | 2539  | 2556 | 1            | 1    | 0.11           | -0.09           | 17                        | 8                                        | 3UTR         |
| hsa-miR-11400 | NM_001377460 | CLCC1      | 2383  | 2400 | 1            | 1    | 0.47           | 0.48            | 17                        | 8                                        | 3UTR         |
| hsa-miR-11400 | NM_001377461 | CLCC1      | 2378  | 2395 | 1            | 1    | 0.18           | 0.51            | 17                        | 8                                        | 3UTR         |
| hsa-miR-11400 | NM_001377464 | CLCC1      | 2338  | 2355 | 1            | 1    | 0.38           | 0.41            | 17                        | 8                                        | 3UTR         |
| hsa-miR-11400 | NM_001377467 | CLCC1      | 2489  | 2506 | 1            | 1    | -0.06          | 0.08            | 17                        | 8                                        | 3UTR         |
| hsa-miR-11400 | NM_001377469 | CLCC1      | 2276  | 2293 | 1            | 1    | 0.06           | 0.10            | 17                        | 8                                        | 3UTR         |
| hsa-miR-11400 | NM_001377470 | CLCC1      | 2549  | 2566 | 1            | 1    | -0.07          | -0.05           | 17                        | 8                                        | 3UTR         |
| hsa-miR-11400 | NM_001048210 | CLCC1      | 2368  | 2385 | 1            | 1    | 0.26           | 0.39            | 17                        | 8                                        | 3UTR         |
| hsa-miR-11400 | NM_173872    | CLCN3      | 4324  | 4356 | 1            | 1    | 1.73           | 2.29            | 32                        | 12                                       | 3UTR         |
| hsa-miR-11400 | NM_173872    | CLCN3      | 3351  | 3369 | 1            | 1    | -0.37          | 1.17            | 18                        | 14                                       | 3UTR         |
| hsa-miR-11400 | NM_001829    | CLCN3      | 4248  | 4280 | 1            | 1    | 1.73           | 2.29            | 32                        | 12                                       | 3UTR         |
| hsa-miR-11400 | NM_001829    | CLCN3      | 3275  | 3293 | 1            | 1    | -0.37          | 1.17            | 18                        | 14                                       | 3UTR         |
| hsa-miR-11400 | NM_001243372 | CLCN3      | 4167  | 4199 | 1            | 1    | 1.73           | 2.29            | 32                        | 12                                       | 3UTR         |
| hsa-miR-11400 | NM_001243372 | CLCN3      | 3194  | 3212 | 1            | 1    | -0.37          | 1.17            | 18                        | 14                                       | 3UTR         |
| hsa-miR-11400 | NM_000084    | CLCN5      | 3712  | 3736 | 1            | 1    | 1.01           | 1.24            | 24                        | 13                                       | 3UTR         |
| hsa-miR-11400 | NM_000084    | CLCN5      | 3644  | 3661 | 1            | 1    | 1.51           | 0.52            | 17                        | 8                                        | 3UTR         |

| mirnaid       | refseqid     | genesymbol | start | end  | binding<br>p | seed | phylopste<br>m | phylopflan<br>k | binding_region_lengt<br>h | longest_<br>consecut<br>ive_pairi<br>ngs | positio<br>n |
|---------------|--------------|------------|-------|------|--------------|------|----------------|-----------------|---------------------------|------------------------------------------|--------------|
| hsa-miR-11400 | NM_001127898 | CLCN5      | 4103  | 4127 | 1            | 1    | 1.01           | 1.24            | 24                        | 13                                       | 3UTR         |
| hsa-miR-11400 | NM_001127898 | CLCN5      | 4035  | 4052 | 1            | 1    | 1.51           | 0.52            | 17                        | 8                                        | 3UTR         |
| hsa-miR-11400 | NM_001127899 | CLCN5      | 4362  | 4386 | 1            | 1    | 1.01           | 1.24            | 24                        | 13                                       | 3UTR         |
| hsa-miR-11400 | NM_001127899 | CLCN5      | 4294  | 4311 | 1            | 1    | 1.51           | 0.52            | 17                        | 8                                        | 3UTR         |
| hsa-miR-11400 | NM_182848    | CLDN10     | 1721  | 1748 | 1            | 1    | -0.36          | -0.13           | 27                        | 9                                        | 3UTR         |
| hsa-miR-11400 | NM_148960    | CLDN19     | 1036  | 1058 | 1            | 1    | -0.20          | 0.03            | 22                        | 8                                        | 3UTR         |
| hsa-miR-11400 | NM_001040199 | CLDND1     | 1686  | 1702 | 1            | 1    | 2.51           | 2.71            | 16                        | 7                                        | 3UTR         |
| hsa-miR-11400 | NM_001040200 | CLDND1     | 1064  | 1085 | 1            | 1    | 1.19           | 0.68            | 17                        | 7                                        | 3UTR         |
| hsa-miR-11400 | NM_207390    | CLEC17A    | 2838  | 2863 | 1            | 1    | 0.00           | 0.00            | 25                        | 8                                        | 3UTR         |
| hsa-miR-11400 | NM_207390    | CLEC17A    | 1989  | 2016 | 1            | 1    | 0.08           | 0.04            | 27                        | 7                                        | 3UTR         |
| hsa-miR-11400 | NM_001297748 | CLEC1A     | 2029  | 2082 | 1            | 1    | 2.87           | 1.59            | 35                        | 8                                        | 3UTR         |
| hsa-miR-11400 | NM_016511    | CLEC1A     | 2147  | 2181 | 1            | 1    | 2.24           | 1.40            | 34                        | 8                                        | 3UTR         |
| hsa-miR-11400 | NM_013269    | CLEC2D     | 1655  | 1674 | 1            | 1    | 0.33           | 0.53            | 19                        | 11                                       | 3UTR         |
| hsa-miR-11400 | NM_001004419 | CLEC2D     | 1737  | 1756 | 1            | 1    | 0.33           | 0.53            | 19                        | 11                                       | 3UTR         |
| hsa-miR-11400 | NM_001197317 | CLEC2D     | 1544  | 1563 | 1            | 1    | 0.33           | 0.53            | 19                        | 11                                       | 3UTR         |
| hsa-miR-11400 | NM_001197318 | CLEC2D     | 1551  | 1570 | 1            | 1    | 0.33           | 0.53            | 19                        | 11                                       | 3UTR         |
| hsa-miR-11400 | NM_001197319 | CLEC2D     | 1440  | 1459 | 1            | 1    | 0.33           | 0.53            | 19                        | 11                                       | 3UTR         |

| mirnaid       | refseqid     | genesymbol | start | end  | binding<br>p | seed | phylopste<br>m | phylopflan<br>k | binding_region_lengt<br>h | longest_<br>consecut<br>ive_pairi<br>ngs | positio<br>n |
|---------------|--------------|------------|-------|------|--------------|------|----------------|-----------------|---------------------------|------------------------------------------|--------------|
| hsa-miR-11400 | NM_018941    | CLN8       | 4725  | 4750 | 1            | 1    | -0.05          | 0.09            | 25                        | 8                                        | 3UTR         |
| hsa-miR-11400 | NM_004898    | CLOCK      | 3157  | 3176 | 1            | 1    | 1.18           | 1.79            | 19                        | 15                                       | 3UTR         |
| hsa-miR-11400 | NM_006012    | CLPP       | 1723  | 1751 | 1            | 1    | 0.74           | 0.30            | 19                        | 15                                       | 3UTR         |
| hsa-miR-11400 | NM_001256819 | CLRN1      | 2228  | 2247 | 1            | 1    | 3.03           | 1.17            | 19                        | 13                                       | 3UTR         |
| hsa-miR-11400 | NM_052995    | CLRN1      | 1009  | 1028 | 1            | 1    | 2.69           | 1.67            | 19                        | 13                                       | 3UTR         |
| hsa-miR-11400 | NM_174878    | CLRN1      | 2056  | 2075 | 1            | 1    | 3.03           | 1.17            | 19                        | 13                                       | 3UTR         |
| hsa-miR-11400 | XM_005256181 | CMIP       | 2187  | 2202 | 1            | 1    | 0.00           | 0.00            | 15                        | 14                                       | 3UTR         |
| hsa-miR-11400 | XM_011523353 | CMIP       | 2324  | 2339 | 1            | 1    | 0.00           | 0.00            | 15                        | 14                                       | 3UTR         |
| hsa-miR-11400 | NM_030629    | CMIP       | 2225  | 2240 | 1            | 1    | 3.03           | 0.81            | 15                        | 14                                       | 3UTR         |
| hsa-miR-11400 | NM_001142344 | CMKLR1     | 4750  | 4771 | 1            | 1    | 2.87           | 2.57            | 21                        | 11                                       | 3UTR         |
| hsa-miR-11400 | NM_001142345 | CMKLR1     | 4222  | 4238 | 1            | 1    | 3.10           | 2.60            | 16                        | 9                                        | 3UTR         |
| hsa-miR-11400 | NM_032359    | CMSS1      | 1506  | 1525 | 1            | 1    | -0.01          | 0.13            | 19                        | 10                                       | 3UTR         |
| hsa-miR-11400 | NM_001167924 | CMSS1      | 1390  | 1409 | 1            | 1    | 0.00           | 0.00            | 19                        | 10                                       | 3UTR         |
| hsa-miR-11400 | XM_011533319 | CMTM7      | 737   | 758  | 1            | 1    | 0.00           | 0.00            | 21                        | 11                                       | 3UTR         |
| hsa-miR-11400 | NM_001277197 | CNIH4      | 355   | 376  | 1            | 1    | 0.89           | 2.36            | 21                        | 12                                       | 3UTR         |
| hsa-miR-11400 | NM_014184    | CNIH4      | 496   | 517  | 1            | 1    | 0.89           | 2.36            | 21                        | 12                                       | 3UTR         |
| hsa-miR-11400 | NM_020348    | CNNM1      | 4256  | 4281 | 1            | 1    | 0.22           | 0.01            | 25                        | 8                                        | 3UTR         |

| mirnaid       | refseqid     | genesymbol | start | end  | binding<br>p | seed | phylopste<br>m | phylopflan<br>k | binding_region_lengt<br>h | longest_<br>consecut<br>ive_pairi<br>ngs | positio<br>n |
|---------------|--------------|------------|-------|------|--------------|------|----------------|-----------------|---------------------------|------------------------------------------|--------------|
| hsa-miR-11400 | NM_017546    | CNOT11     | 2009  | 2029 | 1            | 1    | 0.24           | -0.08           | 20                        | 8                                        | 3UTR         |
| hsa-miR-11400 | NM_001369813 | CNPY1      | 2175  | 2193 | 1            | 1    | 0.40           | 2.13            | 18                        | 14                                       | 3UTR         |
| hsa-miR-11400 | NM_001103176 | CNPY1      | 2011  | 2029 | 1            | 1    | 3.54           | 2.79            | 18                        | 14                                       | 3UTR         |
| hsa-miR-11400 | NM_033181    | CNR1       | 3394  | 3412 | 1            | 1    | 1.05           | 0.93            | 18                        | 7                                        | 3UTR         |
| hsa-miR-11400 | NM_001365874 | CNR1       | 3561  | 3579 | 1            | 1    | 1.95           | 1.83            | 18                        | 7                                        | 3UTR         |
| hsa-miR-11400 | NM_173478    | CNTD1      | 1889  | 1907 | 1            | 1    | 1.12           | 1.00            | 18                        | 10                                       | 3UTR         |
| hsa-miR-11400 | NM_001330222 | CNTD1      | 1671  | 1689 | 1            | 1    | 1.12           | 1.00            | 18                        | 10                                       | 3UTR         |
| hsa-miR-11400 | NM_033655    | CNTNAP3    | 9089  | 9110 | 1            | 1    | 0.19           | 0.81            | 21                        | 8                                        | 3UTR         |
| hsa-miR-11400 | NM_001201380 | CNTNAP3B   | 4333  | 4354 | 1            | 1    | 0.00           | 0.00            | 21                        | 7                                        | 3UTR         |
| hsa-miR-11400 | NM_001008215 | COA5       | 683   | 707  | 1            | 1    | 0.34           | 0.07            | 24                        | 8                                        | 3UTR         |
| hsa-miR-11400 | NM_023077    | COA7       | 3209  | 3228 | 1            | 1    | 0.07           | 0.37            | 19                        | 10                                       | 3UTR         |
| hsa-miR-11400 | NM_001287436 | COBL       | 4581  | 4599 | 0.953846     | 1    | 3.53           | 2.88            | 18                        | 8                                        | 3UTR         |
| hsa-miR-11400 | NM_015198    | COBL       | 4551  | 4569 | 0.953846     | 1    | 3.53           | 2.88            | 18                        | 8                                        | 3UTR         |
| hsa-miR-11400 | NM_001287436 | COBL       | 5252  | 5270 | 1            | 1    | 1.54           | 0.50            | 18                        | 8                                        | 3UTR         |
| hsa-miR-11400 | XM_011515240 | COBL       | 4485  | 4503 | 1            | 1    | 0.00           | 0.00            | 18                        | 8                                        | 3UTR         |
| hsa-miR-11400 | XM_011515240 | COBL       | 5156  | 5174 | 1            | 1    | 0.00           | 0.00            | 18                        | 8                                        | 3UTR         |
| hsa-miR-11400 | XM_011515241 | COBL       | 3846  | 3864 | 1            | 1    | 0.00           | 0.00            | 18                        | 8                                        | 3UTR         |

| mirnaid       | refseqid     | genesymbol | start | end  | binding<br>p | seed | phylopste<br>m | phylopflan<br>k | binding_region_lengt<br>h | longest_<br>consecut<br>ive_pairi<br>ngs | positio<br>n |
|---------------|--------------|------------|-------|------|--------------|------|----------------|-----------------|---------------------------|------------------------------------------|--------------|
| hsa-miR-11400 | XM_011515241 | COBL       | 4517  | 4535 | 1            | 1    | 0.00           | 0.00            | 18                        | 8                                        | 3UTR         |
| hsa-miR-11400 | NM_015198    | COBL       | 5222  | 5240 | 1            | 1    | 1.54           | 0.50            | 18                        | 8                                        | 3UTR         |
| hsa-miR-11400 | NM_181733    | COG5       | 3735  | 3765 | 1            | 1    | 0.00           | 0.00            | 16                        | 14                                       | 3UTR         |
| hsa-miR-11400 | NM_006348    | COG5       | 3798  | 3828 | 1            | 1    | 3.25           | 4.24            | 16                        | 14                                       | 3UTR         |
| hsa-miR-11400 | NM_032382    | COG8       | 3017  | 3042 | 0.961538     | 1    | 3.58           | 3.35            | 25                        | 8                                        | 3UTR         |
| hsa-miR-11400 | NM_032382    | COG8       | 4488  | 4510 | 1            | 1    | 2.36           | 3.77            | 22                        | 11                                       | 3UTR         |
| hsa-miR-11400 | NM_000494    | COL17A1    | 5480  | 5508 | 1            | 1    | 0.71           | 1.45            | 28                        | 10                                       | 3UTR         |
| hsa-miR-11400 | NM_173465    | COL23A1    | 2132  | 2152 | 1            | 1    | 4.79           | 3.20            | 20                        | 6                                        | 3UTR         |
| hsa-miR-11400 | XM_011534692 | COL23A1    | 3127  | 3147 | 1            | 1    | 0.00           | 0.00            | 20                        | 6                                        | 3UTR         |
| hsa-miR-11400 | NM_152890    | COL24A1    | 5839  | 5860 | 1            | 1    | 2.49           | 2.40            | 21                        | 9                                        | 3UTR         |
| hsa-miR-11400 | NM_017845    | COMMD8     | 882   | 897  | 1            | 1    | 4.59           | 2.32            | 15                        | 14                                       | 3UTR         |
| hsa-miR-11400 | NM_001001740 | COP1       | 2604  | 2625 | 1            | 1    | 0.88           | 0.81            | 21                        | 5                                        | 3UTR         |
| hsa-miR-11400 | NM_020441    | CORO1B     | 3296  | 3314 | 1            | 1    | 5.49           | 4.85            | 18                        | 7                                        | 3UTR         |
| hsa-miR-11400 | NM_001276471 | CORO1C     | 3308  | 3351 | 1            | 1    | 4.38           | 4.47            | 25                        | 8                                        | 3UTR         |
| hsa-miR-11400 | NM_014325    | CORO1C     | 3177  | 3220 | 1            | 1    | 3.70           | 4.69            | 25                        | 8                                        | 3UTR         |
| hsa-miR-11400 | NM_001105237 | CORO1C     | 3290  | 3333 | 1            | 1    | 3.86           | 4.69            | 25                        | 8                                        | 3UTR         |
| hsa-miR-11400 | NM_052820    | CORO2A     | 3622  | 3635 | 1            | 1    | 1.37           | 0.94            | 13                        | 12                                       | 3UTR         |

| mirnaid       | refseqid         | genesymbol | start | end  | binding<br>p | seed | phylopste<br>m | phylopflan<br>k | binding_region_lengt<br>h | longest_<br>consecut<br>ive_pairi<br>ngs | positio<br>n |
|---------------|------------------|------------|-------|------|--------------|------|----------------|-----------------|---------------------------|------------------------------------------|--------------|
| hsa-miR-11400 | NM_003389        | CORO2A     | 3809  | 3822 | 1            | 1    | 1.11           | 2.02            | 13                        | 12                                       | 3UTR         |
| hsa-miR-11400 | NM_003389        | CORO2A     | 2802  | 2821 | 1            | 1    | 0.01           | -0.24           | 19                        | 10                                       | 3UTR         |
| hsa-miR-11400 | NM_00129773<br>2 | COX18      | 2182  | 2203 | 1            | 1    | 0.29           | 0.29            | 21                        | 12                                       | 3UTR         |
| hsa-miR-11400 | NM_173827        | COX18      | 2179  | 2200 | 1            | 1    | 0.38           | 0.27            | 21                        | 12                                       | 3UTR         |
| hsa-miR-11400 | NM_00131879<br>4 | COX4I1     | 821   | 864  | 1            | 1    | 6.35           | 2.93            | 15                        | 13                                       | 3UTR         |
| hsa-miR-11400 | NM_004255        | COX5A      | 1141  | 1164 | 1            | 1    | 1.13           | 0.67            | 23                        | 8                                        | 3UTR         |
| hsa-miR-11400 | NM_001870        | CPA3       | 1509  | 1540 | 1            | 1    | 0.58           | 0.01            | 18                        | 10                                       | 3UTR         |
| hsa-miR-11400 | NM_001304        | CPD        | 4410  | 4431 | 1            | 1    | 2.54           | 1.61            | 21                        | 8                                        | 3UTR         |
| hsa-miR-11400 | NM_00119977<br>5 | CPD        | 3768  | 3796 | 1            | 1    | 2.87           | 1.65            | 22                        | 8                                        | 3UTR         |
| hsa-miR-11400 | NM_00135561<br>3 | CPHXL      | 1307  | 1351 | 1            | 1    | 0.37           | -0.06           | 18                        | 9                                        | 3UTR         |
| hsa-miR-11400 | NM_00100822<br>0 | CPLX2      | 3001  | 3019 | 1            | 1    | 0.26           | -0.02           | 18                        | 10                                       | 3UTR         |
| hsa-miR-11400 | NM_00130094<br>7 | CPSF6      | 6599  | 6619 | 1            | 1    | 2.11           | 3.05            | 20                        | 11                                       | 3UTR         |
| hsa-miR-11400 | NM_007007        | CPSF6      | 6488  | 6508 | 1            | 1    | 2.11           | 3.05            | 20                        | 11                                       | 3UTR         |
| hsa-miR-11400 | NM_032680        | CRACR2A    | 2033  | 2050 | 1            | 1    | 0.56           | 0.33            | 17                        | 8                                        | 3UTR         |
| hsa-miR-11400 | NM_00132010<br>0 | CRADD      | 1037  | 1066 | 1            | 1    | 2.04           | 1.05            | 19                        | 8                                        | 3UTR         |
| hsa-miR-11400 | NM_00132010<br>0 | CRADD      | 924   | 954  | 1            | 1    | 0.08           | 1.06            | 23                        | 7                                        | 3UTR         |
| hsa-miR-11400 | XM_00525193<br>4 | CRB2       | 5547  | 5566 | 0.961538     | 1    | 0.00           | 0.00            | 19                        | 18                                       | 3UTR         |

| mirnaid       | refseqid     | genesymbol | start | end  | binding<br>p | seed | phylopste<br>m | phylopflan<br>k | binding_region_lengt<br>h | longest_<br>consecut<br>ive_pairi<br>ngs | positio<br>n |
|---------------|--------------|------------|-------|------|--------------|------|----------------|-----------------|---------------------------|------------------------------------------|--------------|
| hsa-miR-11400 | NM_019060    | CRCT1      | 638   | 657  | 1            | 1    | 0.62           | 0.23            | 19                        | 6                                        | 3UTR         |
| hsa-miR-11400 | NM_182898    | CREB5      | 5538  | 5559 | 1            | 1    | 0.32           | 0.16            | 21                        | 8                                        | 3UTR         |
| hsa-miR-11400 | NM_182899    | CREB5      | 5187  | 5208 | 1            | 1    | 0.32           | 0.16            | 21                        | 8                                        | 3UTR         |
| hsa-miR-11400 | XM_024447005 | CREB5      | 5083  | 5104 | 1            | 1    | 0.00           | 0.00            | 21                        | 8                                        | 3UTR         |
| hsa-miR-11400 | NM_004904    | CREB5      | 5212  | 5233 | 1            | 1    | 0.32           | 0.16            | 21                        | 8                                        | 3UTR         |
| hsa-miR-11400 | NM_001011666 | CREB5      | 4742  | 4763 | 1            | 1    | 0.32           | 0.16            | 21                        | 8                                        | 3UTR         |
| hsa-miR-11400 | NM_001310    | CREBL2     | 2367  | 2387 | 1            | 1    | 1.12           | 0.62            | 20                        | 7                                        | 3UTR         |
| hsa-miR-11400 | NM_182717    | CREM       | 455   | 475  | 1            | 1    | 2.58           | 2.60            | 20                        | 13                                       | 3UTR         |
| hsa-miR-11400 | NM_182720    | CREM       | 419   | 439  | 1            | 1    | 2.58           | 2.60            | 20                        | 13                                       | 3UTR         |
| hsa-miR-11400 | NM_183011    | CREM       | 989   | 1009 | 1            | 1    | 2.58           | 2.60            | 20                        | 13                                       | 3UTR         |
| hsa-miR-11400 | NM_183012    | CREM       | 800   | 820  | 1            | 1    | 2.58           | 2.60            | 20                        | 13                                       | 3UTR         |
| hsa-miR-11400 | NM_183013    | CREM       | 1029  | 1049 | 1            | 1    | 2.58           | 2.60            | 20                        | 13                                       | 3UTR         |
| hsa-miR-11400 | XM_017015723 | CREM       | 898   | 918  | 1            | 1    | 0.00           | 0.00            | 20                        | 13                                       | 3UTR         |
| hsa-miR-11400 | NM_001352466 | CREM       | 530   | 550  | 1            | 1    | 2.58           | 2.60            | 20                        | 13                                       | 3UTR         |
| hsa-miR-11400 | NM_001202483 | CRHR2      | 1872  | 1913 | 1            | 1    | 0.00           | 0.00            | 41                        | 9                                        | 3UTR         |
| hsa-miR-11400 | NM_021151    | CROT       | 2528  | 2545 | 1            | 1    | -0.05          | 0.44            | 17                        | 16                                       | 3UTR         |
| hsa-miR-11400 | NM_001143935 | CROT       | 2612  | 2629 | 1            | 1    | -0.05          | 0.44            | 17                        | 16                                       | 3UTR         |



| mirnaid       | refseqid     | genesymbol | start | end  | binding<br>p | seed | phylopste<br>m | phylopflan<br>k | binding_region_lengt<br>h | longest_<br>consecut<br>ive_pairi<br>ngs | positio<br>n |
|---------------|--------------|------------|-------|------|--------------|------|----------------|-----------------|---------------------------|------------------------------------------|--------------|
| hsa-miR-11400 | NM_022769    | CRTC3      | 4341  | 4373 | 1            | 1    | -0.55          | -0.27           | 32                        | 10                                       | 3UTR         |
| hsa-miR-11400 | NM_001042574 | CRTC3      | 4338  | 4370 | 1            | 1    | -0.55          | -0.27           | 32                        | 10                                       | 3UTR         |
| hsa-miR-11400 | NM_000554    | CRX        | 2495  | 2514 | 1            | 1    | 0.20           | -0.14           | 19                        | 8                                        | 3UTR         |
| hsa-miR-11400 | NM_015974    | CRYL1      | 1108  | 1138 | 1            | 1    | 2.67           | 2.46            | 21                        | 9                                        | 3UTR         |
| hsa-miR-11400 | NM_001363647 | CRYL1      | 946   | 976  | 1            | 1    | 3.92           | 2.93            | 21                        | 9                                        | 3UTR         |
| hsa-miR-11400 | XM_024449014 | CSAD       | 1887  | 1912 | 1            | 1    | 0.00           | 0.00            | 25                        | 8                                        | 3UTR         |
| hsa-miR-11400 | XM_024449015 | CSAD       | 1873  | 1898 | 1            | 1    | 0.00           | 0.00            | 25                        | 8                                        | 3UTR         |
| hsa-miR-11400 | NM_139062    | CSNK1D     | 1653  | 1675 | 1            | 1    | 2.63           | 1.70            | 22                        | 12                                       | 3UTR         |
| hsa-miR-11400 | NM_001893    | CSNK1D     | 1589  | 1611 | 1            | 1    | 0.55           | 0.47            | 22                        | 12                                       | 3UTR         |
| hsa-miR-11400 | NM_001895    | CSNK2A1    | 3676  | 3702 | 0.961538     | 1    | -0.30          | 0.01            | 26                        | 10                                       | 3UTR         |
| hsa-miR-11400 | NM_177559    | CSNK2A1    | 3793  | 3819 | 1            | 1    | -0.15          | -0.08           | 26                        | 10                                       | 3UTR         |
| hsa-miR-11400 | XM_005246865 | CSRNP3     | 9705  | 9741 | 1            | 1    | 0.00           | 0.00            | 24                        | 9                                        | 3UTR         |
| hsa-miR-11400 | NM_024969    | CSRNP3     | 9882  | 9918 | 1            | 1    | 0.95           | 0.64            | 24                        | 9                                        | 3UTR         |
| hsa-miR-11400 | NM_001172173 | CSRNP3     | 9932  | 9968 | 1            | 1    | 0.95           | 0.64            | 24                        | 9                                        | 3UTR         |
| hsa-miR-11400 | NM_015235    | CSTF2T     | 3485  | 3501 | 1            | 1    | 1.88           | 3.26            | 16                        | 15                                       | 3UTR         |
| hsa-miR-11400 | NM_001083914 | CTBP2      | 6309  | 6331 | 0.961538     | 1    | 4.77           | 5.53            | 22                        | 12                                       | 3UTR         |
| hsa-miR-11400 | NM_022802    | CTBP2      | 7832  | 7854 | 1            | 1    | 2.01           | 1.97            | 22                        | 12                                       | 3UTR         |

| mirnaid       | refseqid     | genesymbol | start | end   | binding<br>p | seed | phylopste<br>m | phylopflan<br>k | binding_region_lengt<br>h | longest_<br>consecut<br>ive_pairi<br>ngs | positio<br>n |
|---------------|--------------|------------|-------|-------|--------------|------|----------------|-----------------|---------------------------|------------------------------------------|--------------|
| hsa-miR-11400 | XM_011524010 | CTC1       | 4161  | 4179  | 0.991453     | 1    | 0.00           | 0.00            | 18                        | 15                                       | 3UTR         |
| hsa-miR-11400 | XM_011524010 | CTC1       | 6416  | 6439  | 1            | 1    | 0.00           | 0.00            | 23                        | 12                                       | 3UTR         |
| hsa-miR-11400 | NM_025099    | CTC1       | 4243  | 4261  | 1            | 1    | -0.36          | 0.74            | 18                        | 15                                       | 3UTR         |
| hsa-miR-11400 | NM_001269055 | CTCFL      | 1627  | 1652  | 0.961538     | 1    | 4.52           | 4.07            | 25                        | 8                                        | 3UTR         |
| hsa-miR-11400 | NM_016396    | CTDSPL2    | 2670  | 2692  | 1            | 1    | 1.89           | 1.89            | 22                        | 12                                       | 3UTR         |
| hsa-miR-11400 | NM_005214    | CTLA4      | 1132  | 1150  | 1            | 1    | -0.13          | 0.30            | 18                        | 8                                        | 3UTR         |
| hsa-miR-11400 | NM_001037631 | CTLA4      | 1022  | 1040  | 1            | 1    | -0.13          | 0.30            | 18                        | 8                                        | 3UTR         |
| hsa-miR-11400 | NM_001290307 | CTNNA1     | 2981  | 3004  | 1            | 1    | 1.00           | 0.45            | 23                        | 8                                        | 3UTR         |
| hsa-miR-11400 | NM_001290312 | CTNNA1     | 2269  | 2292  | 1            | 1    | 1.04           | 0.84            | 23                        | 8                                        | 3UTR         |
| hsa-miR-11400 | NM_001903    | CTNNA1     | 2910  | 2933  | 1            | 1    | 1.04           | 0.84            | 23                        | 8                                        | 3UTR         |
| hsa-miR-11400 | NM_148170    | CTSC       | 3562  | 3583  | 1            | 1    | 0.09           | -0.08           | 21                        | 8                                        | 3UTR         |
| hsa-miR-11400 | NM_001114173 | CTSC       | 3518  | 3539  | 1            | 1    | -0.15          | 0.30            | 21                        | 8                                        | 3UTR         |
| hsa-miR-11400 | NM_000396    | CTSK       | 1258  | 1300  | 1            | 1    | 0.84           | 1.59            | 25                        | 7                                        | 3UTR         |
| hsa-miR-11400 | NM_001199739 | CTSS       | 1207  | 1225  | 0.974359     | 1    | 0.00           | 0.00            | 18                        | 10                                       | 3UTR         |
| hsa-miR-11400 | NM_001352888 | CTXND1     | 4760  | 4795  | 1            | 1    | 0.08           | 0.39            | 19                        | 8                                        | 3UTR         |
| hsa-miR-11400 | NM_001081    | CUBN       | 11008 | 11026 | 1            | 1    | 3.88           | 4.01            | 18                        | 17                                       | 3UTR         |
| hsa-miR-11400 | NM_001257197 | CUL3       | 4988  | 5010  | 0.961538     | 1    | 6.62           | 5.89            | 22                        | 8                                        | 3UTR         |

| mirnaid       | refseqid     | genesymbol | start | end  | binding<br>p | seed | phylopste<br>m | phylopflan<br>k | binding_region_lengt<br>h | longest_<br>consecut<br>ive_pairi<br>ngs | positio<br>n |
|---------------|--------------|------------|-------|------|--------------|------|----------------|-----------------|---------------------------|------------------------------------------|--------------|
| hsa-miR-11400 | NM_001257198 | CUL3       | 5033  | 5055 | 0.961538     | 1    | 6.10           | 5.47            | 22                        | 8                                        | 3UTR         |
| hsa-miR-11400 | NM_003590    | CUL3       | 5186  | 5208 | 0.961538     | 1    | 5.97           | 5.82            | 22                        | 8                                        | 3UTR         |
| hsa-miR-11400 | NM_001257197 | CUL3       | 6228  | 6257 | 1            | 1    | 0.71           | 1.18            | 29                        | 10                                       | 3UTR         |
| hsa-miR-11400 | NM_001257198 | CUL3       | 6273  | 6302 | 1            | 1    | 5.98           | 4.95            | 29                        | 10                                       | 3UTR         |
| hsa-miR-11400 | NM_003590    | CUL3       | 6426  | 6455 | 1            | 1    | 0.71           | 1.18            | 29                        | 10                                       | 3UTR         |
| hsa-miR-11400 | NM_001207064 | CXADR      | 1502  | 1521 | 1            | 1    | 0.51           | 0.38            | 19                        | 7                                        | 3UTR         |
| hsa-miR-11400 | NM_001207065 | CXADR      | 1297  | 1316 | 1            | 1    | 0.79           | 0.35            | 19                        | 7                                        | 3UTR         |
| hsa-miR-11400 | NM_001207066 | CXADR      | 1238  | 1261 | 1            | 1    | 0.39           | -0.09           | 23                        | 11                                       | 3UTR         |
| hsa-miR-11400 | NM_001511    | CXCL1      | 469   | 491  | 1            | 1    | -0.22          | -0.45           | 17                        | 9                                        | 3UTR         |
| hsa-miR-11400 | NM_001277990 | CXCL12     | 2457  | 2475 | 1            | 1    | 0.59           | 1.37            | 18                        | 11                                       | 3UTR         |
| hsa-miR-11400 | NM_000609    | CXCL12     | 2867  | 2885 | 1            | 1    | 0.10           | 0.56            | 18                        | 11                                       | 3UTR         |
| hsa-miR-11400 | NM_002089    | CXCL2      | 466   | 488  | 1            | 1    | -0.97          | -0.17           | 17                        | 9                                        | 3UTR         |
| hsa-miR-11400 | XM_005264809 | CXCR6      | 1489  | 1525 | 1            | 1    | 0.00           | 0.00            | 18                        | 8                                        | 3UTR         |
| hsa-miR-11400 | XM_011533291 | CXCR6      | 1965  | 2001 | 1            | 1    | 0.00           | 0.00            | 18                        | 8                                        | 3UTR         |
| hsa-miR-11400 | NM_006564    | CXCR6      | 1432  | 1468 | 1            | 1    | -0.15          | -0.19           | 18                        | 8                                        | 3UTR         |
| hsa-miR-11400 | NM_144970    | CXorf38    | 1461  | 1486 | 1            | 1    | 0.06           | 0.08            | 25                        | 8                                        | 3UTR         |
| hsa-miR-11400 | XM_017029304 | CXorf38    | 2629  | 2654 | 1            | 1    | 0.00           | 0.00            | 25                        | 8                                        | 3UTR         |

| mirnaid       | refseqid     | genesymbol | start | end  | binding<br>p | seed | phylopste<br>m | phylopflan<br>k | binding_region_lengt<br>h | longest_<br>consecut<br>ive_pairi<br>ngs | positio<br>n |
|---------------|--------------|------------|-------|------|--------------|------|----------------|-----------------|---------------------------|------------------------------------------|--------------|
| hsa-miR-11400 | NM_007326    | CYB5R3     | 1225  | 1243 | 1            | 1    | 0.00           | 0.00            | 18                        | 8                                        | 3UTR         |
| hsa-miR-11400 | NM_001129819 | CYB5R3     | 1470  | 1488 | 1            | 1    | 0.00           | 0.00            | 18                        | 8                                        | 3UTR         |
| hsa-miR-11400 | NM_001171660 | CYB5R3     | 1358  | 1376 | 1            | 1    | -0.06          | -0.45           | 18                        | 8                                        | 3UTR         |
| hsa-miR-11400 | NM_001171661 | CYB5R3     | 1286  | 1304 | 1            | 1    | 0.00           | 0.00            | 18                        | 8                                        | 3UTR         |
| hsa-miR-11400 | NM_001319216 | CYP1A1     | 2036  | 2073 | 1            | 1    | 1.73           | 3.33            | 37                        | 12                                       | 3UTR         |
| hsa-miR-11400 | NM_001319216 | CYP1A1     | 2229  | 2272 | 1            | 1    | 2.36           | 1.85            | 43                        | 9                                        | 3UTR         |
| hsa-miR-11400 | NM_001319217 | CYP1A1     | 2123  | 2160 | 1            | 1    | 1.73           | 3.33            | 37                        | 12                                       | 3UTR         |
| hsa-miR-11400 | NM_001319217 | CYP1A1     | 2316  | 2359 | 1            | 1    | 2.36           | 1.85            | 43                        | 9                                        | 3UTR         |
| hsa-miR-11400 | NM_000499    | CYP1A1     | 2120  | 2157 | 1            | 1    | 1.69           | 3.24            | 37                        | 12                                       | 3UTR         |
| hsa-miR-11400 | NM_000499    | CYP1A1     | 2313  | 2356 | 1            | 1    | 2.35           | 1.97            | 43                        | 9                                        | 3UTR         |
| hsa-miR-11400 | NM_001367502 | CYP27C1    | 4097  | 4116 | 1            | 1    | 1.86           | 2.36            | 19                        | 12                                       | 3UTR         |
| hsa-miR-11400 | NM_001001665 | CYP27C1    | 3704  | 3723 | 1            | 1    | 2.72           | 3.11            | 19                        | 12                                       | 3UTR         |
| hsa-miR-11400 | NM_183075    | CYP2U1     | 1902  | 1919 | 1            | 1    | -0.20          | -0.38           | 17                        | 9                                        | 3UTR         |
| hsa-miR-11400 | NM_001082    | CYP4F2     | 2006  | 2053 | 1            | 1    | 0.47           | 0.55            | 18                        | 13                                       | 3UTR         |
| hsa-miR-11400 | NM_004820    | CYP7B1     | 5216  | 5233 | 1            | 1    | 1.78           | 1.29            | 17                        | 16                                       | 3UTR         |
| hsa-miR-11400 | NM_001305630 | CYREN      | 1064  | 1083 | 1            | 1    | 0.41           | 0.26            | 19                        | 8                                        | 3UTR         |
| hsa-miR-11400 | NM_030797    | CYRIA      | 1915  | 1955 | 0.974359     | 1    | -0.14          | 0.03            | 40                        | 11                                       | 3UTR         |

| mirnaid       | refseqid     | genesymbol | start | end  | binding<br>p | seed | phylopste<br>m | phylopflan<br>k | binding_region_lengt<br>h | longest_<br>consecut<br>ive_pairi<br>ngs | positio<br>n |
|---------------|--------------|------------|-------|------|--------------|------|----------------|-----------------|---------------------------|------------------------------------------|--------------|
| hsa-miR-11400 | NM_030797    | CYRIA      | 2057  | 2070 | 1            | 1    | 0.15           | 0.03            | 13                        | 12                                       | 3UTR         |
| hsa-miR-11400 | NM_018659    | CYTL1      | 658   | 670  | 1            | 1    | 2.67           | 1.99            | 12                        | 11                                       | 3UTR         |
| hsa-miR-11400 | NM_015345    | DAAM2      | 3745  | 3789 | 1            | 1    | -0.29          | -0.10           | 22                        | 7                                        | 3UTR         |
| hsa-miR-11400 | NM_001201427 | DAAM2      | 3697  | 3718 | 1            | 1    | -0.26          | -0.07           | 21                        | 7                                        | 3UTR         |
| hsa-miR-11400 | NM_152654    | DAND5      | 1512  | 1534 | 1            | 1    | 0.13           | 0.04            | 22                        | 7                                        | 3UTR         |
| hsa-miR-11400 | NM_152654    | DAND5      | 757   | 776  | 1            | 1    | -0.39          | -0.11           | 19                        | 13                                       | 3UTR         |
| hsa-miR-11400 | NM_001363730 | DAPK2      | 3329  | 3348 | 1            | 1    | 0.11           | 0.03            | 19                        | 8                                        | 3UTR         |
| hsa-miR-11400 | NM_001375658 | DAPK3      | 1840  | 1867 | 1            | 1    | 3.75           | 4.79            | 27                        | 10                                       | 3UTR         |
| hsa-miR-11400 | NM_001017920 | DAPL1      | 393   | 403  | 1            | 1    | 0.84           | 1.97            | 10                        | 9                                        | 3UTR         |
| hsa-miR-11400 | NM_024043    | DBNDD1     | 1908  | 1927 | 1            | 1    | 0.07           | 0.24            | 19                        | 8                                        | 3UTR         |
| hsa-miR-11400 | NM_024043    | DBNDD1     | 1134  | 1151 | 1            | 1    | -0.05          | -0.24           | 17                        | 9                                        | 3UTR         |
| hsa-miR-11400 | NM_001371581 | DBNDD1     | 902   | 919  | 1            | 1    | -0.19          | -0.16           | 17                        | 9                                        | 3UTR         |
| hsa-miR-11400 | NM_001042610 | DBNDD1     | 1889  | 1908 | 1            | 1    | 0.16           | 0.36            | 19                        | 8                                        | 3UTR         |
| hsa-miR-11400 | NM_001918    | DBT        | 4685  | 4703 | 1            | 1    | 0.17           | 0.09            | 18                        | 14                                       | 3UTR         |
| hsa-miR-11400 | NM_001918    | DBT        | 4635  | 4652 | 1            | 1    | 0.10           | 0.09            | 17                        | 10                                       | 3UTR         |
| hsa-miR-11400 | NM_017741    | DCAF16     | 2017  | 2036 | 1            | 1    | -0.07          | -0.13           | 19                        | 9                                        | 3UTR         |
| hsa-miR-11400 | NM_025000    | DCAF17     | 3952  | 3998 | 1            | 1    | 0.18           | 0.29            | 22                        | 9                                        | 3UTR         |

| mirnaid       | refseqid     | genesymbol | start | end  | binding<br>p | seed | phylopste<br>m | phylopflan<br>k | binding_region_lengt<br>h | longest_<br>consecut<br>ive_pairi<br>ngs | positio<br>n |
|---------------|--------------|------------|-------|------|--------------|------|----------------|-----------------|---------------------------|------------------------------------------|--------------|
| hsa-miR-11400 | NM_001289076 | DCLRE1C    | 2066  | 2084 | 1            | 1    | -0.04          | 0.03            | 18                        | 17                                       | 3UTR         |
| hsa-miR-11400 | NM_001289076 | DCLRE1C    | 4238  | 4264 | 1            | 1    | 4.18           | 3.51            | 26                        | 11                                       | 3UTR         |
| hsa-miR-11400 | NM_001289077 | DCLRE1C    | 2338  | 2356 | 1            | 1    | 0.04           | -0.15           | 18                        | 17                                       | 3UTR         |
| hsa-miR-11400 | NM_001289077 | DCLRE1C    | 4510  | 4536 | 1            | 1    | 3.21           | 0.53            | 26                        | 11                                       | 3UTR         |
| hsa-miR-11400 | NM_001289078 | DCLRE1C    | 2099  | 2117 | 1            | 1    | -0.24          | 0.18            | 18                        | 17                                       | 3UTR         |
| hsa-miR-11400 | NM_001289078 | DCLRE1C    | 4271  | 4297 | 1            | 1    | 4.07           | 3.12            | 26                        | 11                                       | 3UTR         |
| hsa-miR-11400 | NM_001289079 | DCLRE1C    | 2660  | 2678 | 1            | 1    | -0.41          | 0.03            | 18                        | 17                                       | 3UTR         |
| hsa-miR-11400 | NM_001289079 | DCLRE1C    | 4832  | 4858 | 1            | 1    | 2.89           | 3.17            | 26                        | 11                                       | 3UTR         |
| hsa-miR-11400 | NM_022487    | DCLRE1C    | 2151  | 2169 | 1            | 1    | 0.07           | 0.27            | 18                        | 17                                       | 3UTR         |
| hsa-miR-11400 | NM_022487    | DCLRE1C    | 4323  | 4349 | 1            | 1    | 2.17           | 2.39            | 26                        | 11                                       | 3UTR         |
| hsa-miR-11400 | NM_001033855 | DCLRE1C    | 2207  | 2225 | 1            | 1    | -0.46          | 0.06            | 18                        | 17                                       | 3UTR         |
| hsa-miR-11400 | NM_001033855 | DCLRE1C    | 4379  | 4405 | 1            | 1    | 1.47           | 1.07            | 26                        | 11                                       | 3UTR         |
| hsa-miR-11400 | NM_001033857 | DCLRE1C    | 2292  | 2310 | 1            | 1    | -0.09          | 0.01            | 18                        | 17                                       | 3UTR         |
| hsa-miR-11400 | NM_001033858 | DCLRE1C    | 2614  | 2632 | 1            | 1    | 0.21           | -0.18           | 18                        | 17                                       | 3UTR         |
| hsa-miR-11400 | NM_133507    | DCN        | 425   | 443  | 1            | 1    | 0.07           | -0.02           | 18                        | 8                                        | 3UTR         |
| hsa-miR-11400 | NM_001290204 | DCP1A      | 4613  | 4636 | 1            | 1    | 2.82           | 1.91            | 23                        | 8                                        | 3UTR         |
| hsa-miR-11400 | NM_018403    | DCP1A      | 4727  | 4750 | 1            | 1    | 2.05           | 2.48            | 23                        | 8                                        | 3UTR         |

| mirnaid       | refseqid     | genesymbol | start | end  | binding<br>p | seed | phylopste<br>m | phylopflan<br>k | binding_region_lengt<br>h | longest_<br>consecut<br>ive_pairi<br>ngs | positio<br>n |
|---------------|--------------|------------|-------|------|--------------|------|----------------|-----------------|---------------------------|------------------------------------------|--------------|
| hsa-miR-11400 | NM_014026    | DCPS       | 2780  | 2801 | 1            | 1    | -0.42          | 0.00            | 21                        | 12                                       | 3UTR         |
| hsa-miR-11400 | NM_004082    | DCTN1      | 4168  | 4180 | 1            | 1    | 3.45           | 2.26            | 12                        | 11                                       | 3UTR         |
| hsa-miR-11400 | NM_001135040 | DCTN1      | 4093  | 4105 | 1            | 1    | 0.00           | 0.00            | 12                        | 11                                       | 3UTR         |
| hsa-miR-11400 | NM_001135041 | DCTN1      | 3792  | 3804 | 1            | 1    | 0.00           | 0.00            | 12                        | 11                                       | 3UTR         |
| hsa-miR-11400 | NM_001190837 | DCTN1      | 4147  | 4159 | 1            | 1    | 3.45           | 2.26            | 12                        | 11                                       | 3UTR         |
| hsa-miR-11400 | NM_032486    | DCTN5      | 4480  | 4499 | 1            | 1    | 0.07           | 0.36            | 19                        | 9                                        | 3UTR         |
| hsa-miR-11400 | NM_001199743 | DCTN5      | 4510  | 4529 | 1            | 1    | 0.00           | 0.00            | 19                        | 9                                        | 3UTR         |
| hsa-miR-11400 | NM_001199743 | DCTN5      | 1979  | 1998 | 1            | 1    | 0.00           | 0.00            | 19                        | 7                                        | 3UTR         |
| hsa-miR-11400 | NM_020640    | DCUN1D1    | 4928  | 4967 | 0.969231     | 1    | 4.06           | 3.19            | 14                        | 12                                       | 3UTR         |
| hsa-miR-11400 | NM_001308101 | DCUN1D1    | 4974  | 5013 | 1            | 1    | 2.04           | 2.55            | 14                        | 12                                       | 3UTR         |
| hsa-miR-11400 | NM_178153    | DCX        | 4221  | 4263 | 1            | 1    | 0.39           | 0.31            | 42                        | 11                                       | 3UTR         |
| hsa-miR-11400 | NM_001369370 | DCX        | 4312  | 4354 | 1            | 1    | 0.34           | 0.30            | 42                        | 11                                       | 3UTR         |
| hsa-miR-11400 | NM_001369372 | DCX        | 4224  | 4266 | 1            | 1    | 0.42           | 0.36            | 42                        | 11                                       | 3UTR         |
| hsa-miR-11400 | NM_012137    | DDAH1      | 1674  | 1691 | 1            | 1    | 0.27           | 0.60            | 17                        | 13                                       | 3UTR         |
| hsa-miR-11400 | NM_001134445 | DDAH1      | 1590  | 1607 | 1            | 1    | 0.94           | 1.00            | 17                        | 13                                       | 3UTR         |
| hsa-miR-11400 | NM_001242890 | DDC        | 1306  | 1328 | 1            | 1    | 0.00           | 0.00            | 22                        | 11                                       | 3UTR         |
| hsa-miR-11400 | NM_004032    | DDO        | 1652  | 1673 | 0.961538     | 1    | 1.96           | 3.23            | 21                        | 9                                        | 3UTR         |

| mirnaid       | refseqid     | genesymbol | start | end  | binding<br>p | seed | phylopste<br>m | phylopflan<br>k | binding_region_lengt<br>h | longest_<br>consecut<br>ive_pairi<br>ngs | positio<br>n |
|---------------|--------------|------------|-------|------|--------------|------|----------------|-----------------|---------------------------|------------------------------------------|--------------|
| hsa-miR-11400 | NM_001372108 | DDO        | 1829  | 1850 | 0.961538     | 1    | 1.96           | 3.23            | 21                        | 9                                        | 3UTR         |
| hsa-miR-11400 | NM_006182    | DDR2       | 6600  | 6620 | 1            | 1    | -0.13          | -0.02           | 20                        | 10                                       | 3UTR         |
| hsa-miR-11400 | NM_001354983 | DDR2       | 7017  | 7037 | 1            | 1    | -0.13          | -0.02           | 20                        | 10                                       | 3UTR         |
| hsa-miR-11400 | NM_001014796 | DDR2       | 6680  | 6700 | 1            | 1    | -0.13          | -0.02           | 20                        | 10                                       | 3UTR         |
| hsa-miR-11400 | NM_020414    | DDX24      | 3736  | 3761 | 0.961538     | 1    | 5.26           | 4.83            | 25                        | 9                                        | 3UTR         |
| hsa-miR-11400 | NM_013264    | DDX25      | 2933  | 2948 | 1            | 1    | -0.40          | -0.12           | 15                        | 8                                        | 3UTR         |
| hsa-miR-11400 | NM_001330438 | DDX25      | 2940  | 2978 | 1            | 1    | -0.22          | -0.30           | 16                        | 8                                        | 3UTR         |
| hsa-miR-11400 | NM_201224    | DDX47      | 1309  | 1329 | 1            | 1    | -0.32          | -0.13           | 20                        | 11                                       | 3UTR         |
| hsa-miR-11400 | NM_016355    | DDX47      | 1456  | 1476 | 1            | 1    | -0.32          | -0.13           | 20                        | 11                                       | 3UTR         |
| hsa-miR-11400 | NM_001242816 | DEF8       | 1922  | 1943 | 1            | 1    | 1.47           | 3.05            | 21                        | 13                                       | 3UTR         |
| hsa-miR-11400 | NM_207469    | DEFB132    | 1122  | 1140 | 1            | 1    | 0.23           | 0.05            | 18                        | 15                                       | 3UTR         |
| hsa-miR-11400 | XM_006714812 | DELE1      | 2671  | 2692 | 1            | 1    | 0.00           | 0.00            | 21                        | 7                                        | 3UTR         |
| hsa-miR-11400 | NM_198440    | DERL3      | 2812  | 2836 | 1            | 1    | 5.04           | 4.21            | 24                        | 7                                        | 3UTR         |
| hsa-miR-11400 | NM_001002862 | DERL3      | 2711  | 2735 | 1            | 1    | 5.14           | 4.15            | 24                        | 7                                        | 3UTR         |
| hsa-miR-11400 | NM_001366604 | DERPC      | 2240  | 2267 | 1            | 1    | 0.75           | 1.07            | 20                        | 11                                       | 3UTR         |
| hsa-miR-11400 | NM_004401    | DFFA       | 5650  | 5669 | 1            | 1    | 2.91           | 1.97            | 19                        | 7                                        | 3UTR         |
| hsa-miR-11400 | NM_005137    | DGCR2      | 1997  | 2015 | 1            | 1    | 0.03           | -0.34           | 18                        | 9                                        | 3UTR         |



| mirnaid       | refseqid     | genesymbol | start | end  | binding<br>p | seed | phylopste<br>m | phylopflan<br>k | binding_region_lengt<br>h | longest_<br>consecut<br>ive_pairi<br>ngs | positio<br>n |
|---------------|--------------|------------|-------|------|--------------|------|----------------|-----------------|---------------------------|------------------------------------------|--------------|
| hsa-miR-11400 | NM_001173533 | DGCR2      | 1874  | 1892 | 1            | 1    | -0.05          | -0.06           | 18                        | 9                                        | 3UTR         |
| hsa-miR-11400 | NM_001184781 | DGCR2      | 1988  | 2006 | 1            | 1    | -0.32          | -0.36           | 18                        | 9                                        | 3UTR         |
| hsa-miR-11400 | NM_022720    | DGCR8      | 2761  | 2782 | 1            | 1    | 0.24           | 2.05            | 21                        | 10                                       | 3UTR         |
| hsa-miR-11400 | NM_152910    | DGKH       | 9522  | 9546 | 1            | 1    | 2.03           | 0.54            | 24                        | 8                                        | 3UTR         |
| hsa-miR-11400 | NM_178009    | DGKH       | 9653  | 9677 | 1            | 1    | 2.03           | 0.54            | 24                        | 8                                        | 3UTR         |
| hsa-miR-11400 | NM_001204504 | DGKH       | 9465  | 9489 | 1            | 1    | 0.00           | 0.00            | 24                        | 8                                        | 3UTR         |
| hsa-miR-11400 | NM_001204506 | DGKH       | 9235  | 9259 | 1            | 1    | 0.68           | 0.56            | 24                        | 8                                        | 3UTR         |
| hsa-miR-11400 | XM_024448741 | DGKZ       | 3242  | 3266 | 1            | 1    | 0.00           | 0.00            | 24                        | 10                                       | 3UTR         |
| hsa-miR-11400 | NM_018706    | DHTKD1     | 4194  | 4213 | 1            | 1    | 0.26           | -0.09           | 19                        | 11                                       | 3UTR         |
| hsa-miR-11400 | NM_198963    | DHX57      | 4680  | 4701 | 1            | 1    | 2.06           | 1.55            | 21                        | 7                                        | 3UTR         |
| hsa-miR-11400 | NM_173602    | DIP2B      | 6965  | 6987 | 1            | 1    | 0.13           | 0.20            | 22                        | 10                                       | 3UTR         |
| hsa-miR-11400 | NM_001252269 | DIPK1A     | 1865  | 1876 | 1            | 1    | 0.00           | 0.00            | 11                        | 10                                       | 3UTR         |
| hsa-miR-11400 | NM_001044369 | DIPK1C     | 2900  | 2924 | 1            | 1    | 0.78           | 0.74            | 24                        | 9                                        | 3UTR         |
| hsa-miR-11400 | NM_014953    | DIS3       | 6998  | 7017 | 1            | 1    | -0.05          | 0.18            | 19                        | 10                                       | 3UTR         |
| hsa-miR-11400 | NM_001128226 | DIS3       | 6908  | 6927 | 1            | 1    | 0.58           | 0.19            | 19                        | 10                                       | 3UTR         |
| hsa-miR-11400 | NM_018662    | DISC1      | 2723  | 2756 | 0.980769     | 1    | 0.35           | 0.03            | 19                        | 12                                       | 3UTR         |
| hsa-miR-11400 | NM_001012957 | DISC1      | 2657  | 2690 | 0.980769     | 1    | 0.35           | 0.03            | 19                        | 12                                       | 3UTR         |

| mirnaid       | refseqid     | genesymbol | start | end  | binding<br>p | seed | phylopste<br>m | phylopflan<br>k | binding_region_lengt<br>h | longest_<br>consecut<br>ive_pairi<br>ngs | positio<br>n |
|---------------|--------------|------------|-------|------|--------------|------|----------------|-----------------|---------------------------|------------------------------------------|--------------|
| hsa-miR-11400 | NM_001164540 | DISC1      | 2346  | 2390 | 0.980769     | 1    | 0.10           | 0.12            | 19                        | 12                                       | 3UTR         |
| hsa-miR-11400 | NM_001164546 | DISC1      | 2265  | 2285 | 1            | 1    | 0.70           | 1.09            | 20                        | 9                                        | 3UTR         |
| hsa-miR-11400 | NM_001288747 | DKC1       | 2016  | 2055 | 1            | 1    | 0.09           | 1.29            | 17                        | 8                                        | 3UTR         |
| hsa-miR-11400 | NM_014421    | DKK2       | 2623  | 2659 | 1            | 1    | 3.73           | 4.67            | 20                        | 14                                       | 3UTR         |
| hsa-miR-11400 | XM_005273810 | DLG2       | 7104  | 7125 | 1            | 1    | 0.00           | 0.00            | 21                        | 9                                        | 3UTR         |
| hsa-miR-11400 | NM_001206769 | DLG2       | 7467  | 7488 | 1            | 1    | 0.00           | 0.00            | 21                        | 9                                        | 3UTR         |
| hsa-miR-11400 | XM_006724626 | DLG3       | 4039  | 4060 | 1            | 1    | 0.00           | 0.00            | 21                        | 12                                       | 3UTR         |
| hsa-miR-11400 | NM_020730    | DLG3       | 3060  | 3081 | 1            | 1    | 0.09           | 0.32            | 21                        | 12                                       | 3UTR         |
| hsa-miR-11400 | NM_021120    | DLG3       | 4012  | 4033 | 1            | 1    | 0.09           | 0.32            | 21                        | 12                                       | 3UTR         |
| hsa-miR-11400 | NM_001166278 | DLG3       | 2423  | 2444 | 1            | 1    | 1.22           | 0.90            | 21                        | 12                                       | 3UTR         |
| hsa-miR-11400 | NM_001317172 | DLK1       | 1148  | 1172 | 1            | 1    | 0.57           | 0.40            | 24                        | 10                                       | 3UTR         |
| hsa-miR-11400 | NM_003836    | DLK1       | 1367  | 1391 | 1            | 1    | 0.57           | 0.40            | 24                        | 10                                       | 3UTR         |
| hsa-miR-11400 | NM_001286656 | DLK2       | 1428  | 1455 | 1            | 1    | 0.44           | 0.16            | 22                        | 9                                        | 3UTR         |
| hsa-miR-11400 | NM_206539    | DLK2       | 1938  | 1965 | 1            | 1    | 0.30           | -0.03           | 22                        | 9                                        | 3UTR         |
| hsa-miR-11400 | NM_023932    | DLK2       | 1446  | 1473 | 1            | 1    | 0.44           | 0.16            | 22                        | 9                                        | 3UTR         |
| hsa-miR-11400 | XM_005267537 | DMAC2L     | 4900  | 4920 | 1            | 1    | 0.00           | 0.00            | 20                        | 11                                       | 3UTR         |
| hsa-miR-11400 | NM_001382507 | DMAC2L     | 1632  | 1652 | 1            | 1    | 0.26           | 0.39            | 20                        | 11                                       | 3UTR         |

| mirnaid       | refseqid     | genesymbol | start | end   | binding<br>p | seed | phylopste<br>m | phylopflan<br>k | binding_region_lengt<br>h | longest_<br>consecut<br>ive_pairi<br>ngs | positio<br>n |
|---------------|--------------|------------|-------|-------|--------------|------|----------------|-----------------|---------------------------|------------------------------------------|--------------|
| hsa-miR-11400 | NM_001003803 | DMAC2L     | 2267  | 2287  | 1            | 1    | 0.26           | 0.39            | 20                        | 11                                       | 3UTR         |
| hsa-miR-11400 | NM_001003805 | DMAC2L     | 2095  | 2115  | 1            | 1    | 0.26           | 0.39            | 20                        | 11                                       | 3UTR         |
| hsa-miR-11400 | NM_147192    | DMBX1      | 2380  | 2399  | 0.974359     | 1    | -0.38          | -0.28           | 19                        | 16                                       | 3UTR         |
| hsa-miR-11400 | NM_172225    | DMBX1      | 2547  | 2566  | 0.974359     | 1    | -0.38          | -0.28           | 19                        | 16                                       | 3UTR         |
| hsa-miR-11400 | NM_004407    | DMP1       | 1862  | 1880  | 1            | 1    | -0.07          | 0.27            | 18                        | 11                                       | 3UTR         |
| hsa-miR-11400 | NM_001079911 | DMP1       | 1814  | 1832  | 1            | 1    | -0.07          | 0.27            | 18                        | 11                                       | 3UTR         |
| hsa-miR-11400 | XM_017027125 | DMRTC2     | 1391  | 1410  | 1            | 1    | 0.00           | 0.00            | 19                        | 13                                       | 3UTR         |
| hsa-miR-11400 | NM_001302816 | DMTN       | 2098  | 2121  | 1            | 1    | -0.52          | -0.30           | 23                        | 12                                       | 3UTR         |
| hsa-miR-11400 | NM_001302817 | DMTN       | 1728  | 1751  | 1            | 1    | -0.52          | -0.30           | 23                        | 12                                       | 3UTR         |
| hsa-miR-11400 | NM_001978    | DMTN       | 2164  | 2187  | 1            | 1    | -0.52          | -0.30           | 23                        | 12                                       | 3UTR         |
| hsa-miR-11400 | NM_001114135 | DMTN       | 1849  | 1872  | 1            | 1    | -0.52          | -0.30           | 23                        | 12                                       | 3UTR         |
| hsa-miR-11400 | NM_001114136 | DMTN       | 1715  | 1738  | 1            | 1    | -0.52          | -0.30           | 23                        | 12                                       | 3UTR         |
| hsa-miR-11400 | NM_001114137 | DMTN       | 1913  | 1936  | 1            | 1    | -0.52          | -0.30           | 23                        | 12                                       | 3UTR         |
| hsa-miR-11400 | NM_001114138 | DMTN       | 1965  | 1988  | 1            | 1    | -0.52          | -0.30           | 23                        | 12                                       | 3UTR         |
| hsa-miR-11400 | NM_001114139 | DMTN       | 1707  | 1730  | 1            | 1    | -0.52          | -0.30           | 23                        | 12                                       | 3UTR         |
| hsa-miR-11400 | NM_001271581 | DNAJC10    | 13804 | 13822 | 1            | 1    | 1.24           | 1.33            | 18                        | 10                                       | 3UTR         |
| hsa-miR-11400 | NM_018981    | DNAJC10    | 13942 | 13960 | 1            | 1    | 1.24           | 1.33            | 18                        | 10                                       | 3UTR         |

| mirnaid       | refseqid     | genesymbol | start | end  | binding<br>p | seed | phylopste<br>m | phylopflan<br>k | binding_region_lengt<br>h | longest_<br>consecut<br>ive_pairi<br>ngs | positio<br>n |
|---------------|--------------|------------|-------|------|--------------|------|----------------|-----------------|---------------------------|------------------------------------------|--------------|
| hsa-miR-11400 | NM_013238    | DNAJC15    | 7124  | 7141 | 1            | 1    | -0.38          | -0.09           | 17                        | 8                                        | 3UTR         |
| hsa-miR-11400 | NM_152686    | DNAJC18    | 4445  | 4470 | 1            | 1    | 4.07           | 3.64            | 25                        | 8                                        | 3UTR         |
| hsa-miR-11400 | NM_001144766 | DNAJC7     | 1726  | 1747 | 1            | 1    | 0.51           | 2.29            | 21                        | 9                                        | 3UTR         |
| hsa-miR-11400 | NM_031427    | DNAL1      | 2354  | 2379 | 1            | 1    | -0.18          | -0.03           | 25                        | 8                                        | 3UTR         |
| hsa-miR-11400 | NM_001375    | DNASE2     | 1664  | 1689 | 1            | 1    | 1.66           | 1.02            | 25                        | 8                                        | 3UTR         |
| hsa-miR-11400 | NM_001080849 | DNLZ       | 1811  | 1832 | 1            | 1    | 0.11           | 0.16            | 21                        | 15                                       | 3UTR         |
| hsa-miR-11400 | NM_024940    | DOCK5      | 8347  | 8368 | 1            | 1    | -0.23          | 0.17            | 21                        | 12                                       | 3UTR         |
| hsa-miR-11400 | NM_203447    | DOCK8      | 7070  | 7095 | 0.961538     | 1    | 0.15           | -0.22           | 25                        | 13                                       | 3UTR         |
| hsa-miR-11400 | XM_011518049 | DOCK8      | 5630  | 5655 | 0.961538     | 1    | 0.00           | 0.00            | 25                        | 13                                       | 3UTR         |
| hsa-miR-11400 | NM_001190458 | DOCK8      | 6761  | 6786 | 0.961538     | 1    | 0.15           | -0.22           | 25                        | 13                                       | 3UTR         |
| hsa-miR-11400 | NM_001193536 | DOCK8      | 6857  | 6882 | 0.961538     | 1    | 0.20           | -0.20           | 25                        | 13                                       | 3UTR         |
| hsa-miR-11400 | NM_152721    | DOK6       | 1354  | 1375 | 1            | 1    | 1.00           | 2.02            | 21                        | 9                                        | 3UTR         |
| hsa-miR-11400 | NM_130434    | DPP8       | 4490  | 4515 | 0.961538     | 1    | 5.97           | 4.75            | 18                        | 16                                       | 3UTR         |
| hsa-miR-11400 | NM_197960    | DPP8       | 4491  | 4516 | 0.961538     | 1    | 4.82           | 4.82            | 18                        | 16                                       | 3UTR         |
| hsa-miR-11400 | NM_197961    | DPP8       | 4473  | 4498 | 1            | 1    | 3.51           | 4.44            | 18                        | 16                                       | 3UTR         |
| hsa-miR-11400 | XM_017022378 | DPP8       | 4460  | 4485 | 1            | 1    | 0.00           | 0.00            | 18                        | 16                                       | 3UTR         |
| hsa-miR-11400 | NM_017743    | DPP8       | 4190  | 4215 | 1            | 1    | 0.59           | 0.55            | 18                        | 16                                       | 3UTR         |

| mirnaid       | refseqid     | genesymbol | start | end  | binding<br>p | seed | phylopste<br>m | phylopflan<br>k | binding_region_lengt<br>h | longest_<br>consecut<br>ive_pairi<br>ngs | positio<br>n |
|---------------|--------------|------------|-------|------|--------------|------|----------------|-----------------|---------------------------|------------------------------------------|--------------|
| hsa-miR-11400 | NM_001365987 | DPP9       | 2091  | 2109 | 1            | 1    | 0.64           | 0.86            | 18                        | 7                                        | 3UTR         |
| hsa-miR-11400 | NM_001384637 | DPP9       | 1913  | 1931 | 1            | 1    | 0.64           | 0.86            | 18                        | 7                                        | 3UTR         |
| hsa-miR-11400 | NM_173812    | DPY19L2    | 2816  | 2833 | 1            | 1    | 3.99           | 3.46            | 17                        | 10                                       | 3UTR         |
| hsa-miR-11400 | NM_001253723 | DPYSL5     | 4406  | 4435 | 1            | 1    | 0.51           | 0.53            | 22                        | 9                                        | 3UTR         |
| hsa-miR-11400 | NM_001253723 | DPYSL5     | 3040  | 3059 | 1            | 1    | -0.71          | -0.01           | 19                        | 14                                       | 3UTR         |
| hsa-miR-11400 | NM_001253723 | DPYSL5     | 5208  | 5224 | 1            | 1    | 0.00           | 0.00            | 16                        | 15                                       | 3UTR         |
| hsa-miR-11400 | NM_001253724 | DPYSL5     | 3178  | 3197 | 1            | 1    | 0.37           | -0.24           | 19                        | 14                                       | 3UTR         |
| hsa-miR-11400 | NM_020134    | DPYSL5     | 2798  | 2817 | 1            | 1    | 0.42           | 0.03            | 19                        | 14                                       | 3UTR         |
| hsa-miR-11400 | XM_005269005 | DRAM1      | 1717  | 1742 | 1            | 1    | 0.00           | 0.00            | 25                        | 9                                        | 3UTR         |
| hsa-miR-11400 | NM_001145315 | DSN1       | 1960  | 1979 | 1            | 1    | 0.33           | 0.86            | 19                        | 10                                       | 3UTR         |
| hsa-miR-11400 | NM_001145318 | DSN1       | 1911  | 1930 | 1            | 1    | 0.76           | 0.52            | 19                        | 10                                       | 3UTR         |
| hsa-miR-11400 | NM_006870    | DSTN       | 1650  | 1676 | 1            | 1    | 0.84           | 1.66            | 26                        | 16                                       | 3UTR         |
| hsa-miR-11400 | NM_006870    | DSTN       | 2286  | 2315 | 1            | 1    | 0.27           | 0.08            | 21                        | 12                                       | 3UTR         |
| hsa-miR-11400 | NM_001011546 | DSTN       | 1782  | 1808 | 1            | 1    | 0.84           | 1.66            | 26                        | 16                                       | 3UTR         |
| hsa-miR-11400 | NM_001011546 | DSTN       | 2418  | 2447 | 1            | 1    | 0.27           | 0.08            | 21                        | 12                                       | 3UTR         |
| hsa-miR-11400 | NM_001318043 | DTD1       | 2620  | 2662 | 1            | 1    | 0.61           | 0.27            | 20                        | 9                                        | 3UTR         |
| hsa-miR-11400 | NM_032978    | DTNA       | 2161  | 2181 | 1            | 1    | 0.05           | 0.28            | 20                        | 8                                        | 3UTR         |

| mirnaid       | refseqid         | genesymbol       | start | end   | binding<br>p | seed | phylopste<br>m | phylopflan<br>k | binding_region_lengt<br>h | longest_<br>consecut<br>ive_pairi<br>ngs | positio<br>n |
|---------------|------------------|------------------|-------|-------|--------------|------|----------------|-----------------|---------------------------|------------------------------------------|--------------|
| hsa-miR-11400 | NM_032979        | DTNA             | 2179  | 2199  | 1            | 1    | 0.05           | 0.28            | 20                        | 8                                        | 3UTR         |
| hsa-miR-11400 | NM_032981        | DTNA             | 1232  | 1252  | 1            | 1    | 0.05           | 0.28            | 20                        | 8                                        | 3UTR         |
| hsa-miR-11400 | NM_00119894<br>1 | DTNA             | 1990  | 2010  | 1            | 1    | 0.05           | 0.28            | 20                        | 8                                        | 3UTR         |
| hsa-miR-11400 | NM_00119894<br>5 | DTNA             | 1587  | 1620  | 1            | 1    | 0.42           | 0.13            | 21                        | 8                                        | 3UTR         |
| hsa-miR-11400 | NM_020234        | DTWD1            | 10374 | 10393 | 1            | 1    | 0.11           | 0.30            | 19                        | 10                                       | 3UTR         |
| hsa-miR-11400 | NM_00114495<br>5 | DTWD1            | 10246 | 10265 | 1            | 1    | 0.11           | 0.30            | 19                        | 10                                       | 3UTR         |
| hsa-miR-11400 | NM_00130808<br>1 | DTWD2            | 5331  | 5381  | 0.974359     | 1    | 3.85           | 3.50            | 26                        | 8                                        | 3UTR         |
| hsa-miR-11400 | NM_00127626<br>7 | DUOXA1           | 1484  | 1505  | 1            | 1    | 0.13           | -0.03           | 21                        | 8                                        | 3UTR         |
| hsa-miR-11400 | NM_00127626<br>8 | DUOXA1           | 1143  | 1164  | 1            | 1    | 0.52           | 0.43            | 21                        | 8                                        | 3UTR         |
| hsa-miR-11400 | XM_00672075<br>1 | DUOXA1           | 1304  | 1325  | 1            | 1    | 0.00           | 0.00            | 21                        | 8                                        | 3UTR         |
| hsa-miR-11400 | NM_181581        | DUS4L            | 1486  | 1506  | 1            | 1    | 0.01           | 0.10            | 20                        | 10                                       | 3UTR         |
| hsa-miR-11400 | NM_00137136<br>6 | DUS4L-<br>BCAP29 | 3285  | 3303  | 1            | 1    | 0.00           | 0.00            | 18                        | 10                                       | 3UTR         |
| hsa-miR-11400 | NM_00137136<br>7 | DUS4L-<br>BCAP29 | 3196  | 3214  | 1            | 1    | 0.00           | 0.00            | 18                        | 10                                       | 3UTR         |
| hsa-miR-11400 | XM_01701631<br>4 | DUSP13           | 805   | 825   | 1            | 1    | 0.00           | 0.00            | 20                        | 9                                        | 3UTR         |
| hsa-miR-11400 | NM_00100727<br>1 | DUSP13           | 868   | 889   | 1            | 1    | 0.55           | 1.20            | 21                        | 9                                        | 3UTR         |
| hsa-miR-11400 | NM_024025        | DUSP26           | 1635  | 1685  | 1            | 1    | 0.52           | 0.18            | 22                        | 20                                       | 3UTR         |
| hsa-miR-11400 | NM_001947        | DUSP7            | 3072  | 3104  | 1            | 1    | 0.64           | 0.47            | 32                        | 9                                        | 3UTR         |

| mirnaid       | refseqid     | genesymbol | start | end  | binding<br>p | seed | phylopste<br>m | phylopflan<br>k | binding_region_lengt<br>h | longest_<br>consecut<br>ive_pairi<br>ngs | positio<br>n |
|---------------|--------------|------------|-------|------|--------------|------|----------------|-----------------|---------------------------|------------------------------------------|--------------|
| hsa-miR-11400 | NM_004423    | DVL3       | 3526  | 3552 | 1            | 1    | 0.25           | 0.29            | 26                        | 15                                       | 3UTR         |
| hsa-miR-11400 | XM_005269550 | DYDC1      | 2541  | 2566 | 1            | 1    | 0.00           | 0.00            | 25                        | 8                                        | 3UTR         |
| hsa-miR-11400 | NM_080677    | DYNLL2     | 860   | 881  | 1            | 1    | 0.46           | 0.96            | 21                        | 8                                        | 3UTR         |
| hsa-miR-11400 | NM_080677    | DYNLL2     | 3634  | 3654 | 1            | 1    | 0.19           | 0.10            | 20                        | 11                                       | 3UTR         |
| hsa-miR-11400 | NM_006520    | DYNLT3     | 1628  | 1658 | 1            | 1    | 0.52           | 1.03            | 18                        | 16                                       | 3UTR         |
| hsa-miR-11400 | NM_001347721 | DYRK1A     | 6477  | 6499 | 1            | 1    | 0.81           | 0.01            | 22                        | 6                                        | 3UTR         |
| hsa-miR-11400 | NM_001347722 | DYRK1A     | 5734  | 5756 | 1            | 1    | 0.81           | 0.01            | 22                        | 6                                        | 3UTR         |
| hsa-miR-11400 | NM_001347723 | DYRK1A     | 8374  | 8399 | 1            | 1    | 0.00           | 0.00            | 25                        | 7                                        | 3UTR         |
| hsa-miR-11400 | NM_001949    | E2F3       | 4378  | 4397 | 1            | 1    | 3.35           | 2.99            | 19                        | 9                                        | 3UTR         |
| hsa-miR-11400 | NM_001243076 | E2F3       | 3832  | 3851 | 1            | 1    | 3.33           | 3.10            | 19                        | 9                                        | 3UTR         |
| hsa-miR-11400 | NM_001351378 | EDC3       | 2112  | 2144 | 1            | 1    | 4.67           | 4.62            | 32                        | 8                                        | 3UTR         |
| hsa-miR-11400 | NM_001142443 | EDC3       | 3759  | 3778 | 1            | 1    | -0.42          | 0.11            | 19                        | 14                                       | 3UTR         |
| hsa-miR-11400 | NM_001142443 | EDC3       | 2245  | 2277 | 1            | 1    | 5.12           | 4.84            | 32                        | 8                                        | 3UTR         |
| hsa-miR-11400 | NM_001142444 | EDC3       | 2030  | 2062 | 1            | 1    | 1.03           | 3.66            | 32                        | 8                                        | 3UTR         |
| hsa-miR-11400 | NM_001955    | EDN1       | 1717  | 1738 | 1            | 1    | 0.16           | 0.50            | 21                        | 6                                        | 3UTR         |
| hsa-miR-11400 | NM_000115    | EDNRB      | 2249  | 2268 | 1            | 1    | 0.18           | 0.04            | 19                        | 11                                       | 3UTR         |
| hsa-miR-11400 | NM_000115    | EDNRB      | 2564  | 2582 | 1            | 1    | 1.00           | 0.47            | 18                        | 12                                       | 3UTR         |

| mirnaid       | refseqid     | genesymbol | start | end  | binding<br>p | seed | phylopste<br>m | phylopflan<br>k | binding_region_lengt<br>h | longest_<br>consecut<br>ive_pairi<br>ngs | positio<br>n |
|---------------|--------------|------------|-------|------|--------------|------|----------------|-----------------|---------------------------|------------------------------------------|--------------|
| hsa-miR-11400 | NM_001122659 | EDNRB      | 2275  | 2294 | 1            | 1    | 0.66           | 0.07            | 19                        | 11                                       | 3UTR         |
| hsa-miR-11400 | NM_001122659 | EDNRB      | 2590  | 2608 | 1            | 1    | -0.01          | 0.76            | 18                        | 12                                       | 3UTR         |
| hsa-miR-11400 | NM_001201397 | EDNRB      | 2440  | 2459 | 1            | 1    | 1.09           | 1.38            | 19                        | 11                                       | 3UTR         |
| hsa-miR-11400 | NM_001201397 | EDNRB      | 2755  | 2773 | 1            | 1    | 4.83           | 4.43            | 18                        | 12                                       | 3UTR         |
| hsa-miR-11400 | NM_001355529 | EFCAB10    | 754   | 776  | 0.987179     | 1    | 0.53           | 1.35            | 22                        | 7                                        | 3UTR         |
| hsa-miR-11400 | NM_001962    | EFNA5      | 1941  | 1973 | 1            | 1    | 1.27           | 1.83            | 32                        | 9                                        | 3UTR         |
| hsa-miR-11400 | NM_001277174 | EFS        | 1469  | 1503 | 1            | 1    | 1.98           | 1.03            | 34                        | 10                                       | 3UTR         |
| hsa-miR-11400 | NM_032459    | EFS        | 1697  | 1731 | 1            | 1    | 0.80           | 0.64            | 34                        | 10                                       | 3UTR         |
| hsa-miR-11400 | NM_001357021 | EGF        | 5489  | 5507 | 1            | 1    | -0.17          | 0.01            | 18                        | 17                                       | 3UTR         |
| hsa-miR-11400 | NM_001178131 | EGF        | 5811  | 5829 | 1            | 1    | -0.17          | 0.01            | 18                        | 17                                       | 3UTR         |
| hsa-miR-11400 | NM_001282444 | EHD1       | 4360  | 4381 | 1            | 1    | -0.31          | -0.53           | 21                        | 11                                       | 3UTR         |
| hsa-miR-11400 | NM_001282445 | EHD1       | 4038  | 4059 | 1            | 1    | 0.00           | 0.00            | 21                        | 11                                       | 3UTR         |
| hsa-miR-11400 | XM_011519025 | EHMT1      | 4583  | 4601 | 1            | 1    | 0.00           | 0.00            | 18                        | 17                                       | 3UTR         |
| hsa-miR-11400 | NM_005801    | EIF1       | 2185  | 2205 | 1            | 1    | 0.05           | -0.03           | 20                        | 8                                        | 3UTR         |
| hsa-miR-11400 | NM_005801    | EIF1       | 1367  | 1387 | 1            | 1    | -0.16          | -0.26           | 20                        | 6                                        | 3UTR         |
| hsa-miR-11400 | NM_002759    | EIF2AK2    | 3941  | 3962 | 1            | 1    | 1.20           | 1.43            | 21                        | 8                                        | 3UTR         |
| hsa-miR-11400 | NM_003751    | EIF3B      | 2825  | 2856 | 1            | 1    | 0.13           | 0.13            | 24                        | 12                                       | 3UTR         |



| mirnaid       | refseqid     | genesymbol | start | end  | binding<br>p | seed | phylopste<br>m | phylopflan<br>k | binding_region_lengt<br>h | longest_<br>consecut<br>ive_pairi<br>ngs | positio<br>n |
|---------------|--------------|------------|-------|------|--------------|------|----------------|-----------------|---------------------------|------------------------------------------|--------------|
| hsa-miR-11400 | NM_001037283 | EIF3B      | 2900  | 2931 | 1            | 1    | 0.13           | 0.13            | 24                        | 12                                       | 3UTR         |
| hsa-miR-11400 | NM_003754    | EIF3F      | 1179  | 1199 | 1            | 1    | 0.27           | 0.83            | 20                        | 6                                        | 3UTR         |
| hsa-miR-11400 | NM_001330202 | EIF4E2     | 1011  | 1037 | 0.961538     | 1    | 6.78           | 4.98            | 26                        | 8                                        | 3UTR         |
| hsa-miR-11400 | NM_004846    | EIF4E2     | 915   | 941  | 1            | 1    | 1.42           | 2.42            | 26                        | 8                                        | 3UTR         |
| hsa-miR-11400 | NM_001330201 | EIF4E2     | 780   | 806  | 1            | 1    | 2.44           | 2.41            | 26                        | 8                                        | 3UTR         |
| hsa-miR-11400 | NM_001134651 | EIF4E3     | 8676  | 8694 | 1            | 1    | 0.67           | 0.66            | 18                        | 8                                        | 3UTR         |
| hsa-miR-11400 | NM_001291157 | EIF4G1     | 5232  | 5261 | 1            | 1    | 3.09           | 1.89            | 29                        | 15                                       | 3UTR         |
| hsa-miR-11400 | NM_182917    | EIF4G1     | 5431  | 5460 | 1            | 1    | 3.09           | 1.89            | 29                        | 15                                       | 3UTR         |
| hsa-miR-11400 | NM_198241    | EIF4G1     | 5172  | 5201 | 1            | 1    | 3.09           | 1.89            | 29                        | 15                                       | 3UTR         |
| hsa-miR-11400 | NM_198242    | EIF4G1     | 4757  | 4786 | 1            | 1    | 3.09           | 1.89            | 29                        | 15                                       | 3UTR         |
| hsa-miR-11400 | NM_198244    | EIF4G1     | 4934  | 4963 | 1            | 1    | 3.09           | 1.89            | 29                        | 15                                       | 3UTR         |
| hsa-miR-11400 | NM_004953    | EIF4G1     | 4845  | 4874 | 1            | 1    | 3.09           | 1.89            | 29                        | 15                                       | 3UTR         |
| hsa-miR-11400 | NM_001194946 | EIF4G1     | 5193  | 5222 | 1            | 1    | 3.09           | 1.89            | 29                        | 15                                       | 3UTR         |
| hsa-miR-11400 | NM_018696    | ELAC1      | 1937  | 1970 | 1            | 1    | 0.47           | 0.30            | 18                        | 12                                       | 3UTR         |
| hsa-miR-11400 | NM_152748    | ELAPOR2    | 2900  | 2921 | 1            | 1    | 0.50           | 0.09            | 21                        | 8                                        | 3UTR         |
| hsa-miR-11400 | XM_011515921 | ELAPOR2    | 3252  | 3273 | 1            | 1    | 0.00           | 0.00            | 21                        | 8                                        | 3UTR         |
| hsa-miR-11400 | NM_001257168 | ELK1       | 900   | 919  | 1            | 1    | 0.00           | 0.00            | 19                        | 8                                        | 3UTR         |

| mirnaid       | refseqid     | genesymbol | start | end  | binding<br>p | seed | phylopste<br>m | phylopflan<br>k | binding_region_lengt<br>h | longest_<br>consecut<br>ive_pairi<br>ngs | positio<br>n |
|---------------|--------------|------------|-------|------|--------------|------|----------------|-----------------|---------------------------|------------------------------------------|--------------|
| hsa-miR-11400 | NM_005229    | ELK1       | 1672  | 1691 | 1            | 1    | 0.00           | 0.00            | 19                        | 8                                        | 3UTR         |
| hsa-miR-11400 | NM_001114123 | ELK1       | 1778  | 1797 | 1            | 1    | 0.00           | 0.00            | 19                        | 8                                        | 3UTR         |
| hsa-miR-11400 | NM_130442    | ELMO1      | 2203  | 2237 | 1            | 1    | 1.50           | 0.44            | 15                        | 13                                       | 3UTR         |
| hsa-miR-11400 | NM_133171    | ELMO2      | 3599  | 3614 | 1            | 1    | -0.25          | 0.01            | 15                        | 14                                       | 3UTR         |
| hsa-miR-11400 | NM_182764    | ELMO2      | 3495  | 3510 | 1            | 1    | 1.71           | 2.67            | 15                        | 14                                       | 3UTR         |
| hsa-miR-11400 | NM_001318253 | ELMO2      | 3667  | 3682 | 1            | 1    | -0.25          | 0.01            | 15                        | 14                                       | 3UTR         |
| hsa-miR-11400 | NM_153702    | ELMOD2     | 1531  | 1550 | 1            | 1    | -0.46          | 0.01            | 19                        | 11                                       | 3UTR         |
| hsa-miR-11400 | NM_153702    | ELMOD2     | 3946  | 3962 | 1            | 1    | 0.81           | 0.13            | 16                        | 7                                        | 3UTR         |
| hsa-miR-11400 | NM_003198    | ELOA       | 3903  | 3921 | 1            | 1    | -0.83          | -0.07           | 18                        | 9                                        | 3UTR         |
| hsa-miR-11400 | NM_017770    | ELOVL2     | 3901  | 3923 | 1            | 1    | 1.23           | 1.56            | 22                        | 5                                        | 3UTR         |
| hsa-miR-11400 | NM_001297617 | ELOVL7     | 2437  | 2460 | 1            | 1    | 0.49           | 0.62            | 23                        | 10                                       | 3UTR         |
| hsa-miR-11400 | NM_024930    | ELOVL7     | 2090  | 2113 | 1            | 1    | 0.24           | 0.46            | 23                        | 10                                       | 3UTR         |
| hsa-miR-11400 | NM_001104558 | ELOVL7     | 2039  | 2062 | 1            | 1    | 0.56           | 0.32            | 23                        | 10                                       | 3UTR         |
| hsa-miR-11400 | NM_018255    | ELP2       | 7537  | 7563 | 1            | 1    | 0.05           | -0.05           | 26                        | 8                                        | 3UTR         |
| hsa-miR-11400 | NM_001242875 | ELP2       | 7732  | 7758 | 1            | 1    | 0.00           | 0.00            | 26                        | 8                                        | 3UTR         |
| hsa-miR-11400 | NM_001242876 | ELP2       | 7522  | 7548 | 1            | 1    | 0.00           | 0.00            | 26                        | 8                                        | 3UTR         |
| hsa-miR-11400 | NM_001242877 | ELP2       | 7459  | 7485 | 1            | 1    | 0.00           | 0.00            | 26                        | 8                                        | 3UTR         |

| mirnaid       | refseqid     | genesymbol | start | end  | binding<br>p | seed | phylopste<br>m | phylopflan<br>k | binding_region_lengt<br>h | longest_<br>consecut<br>ive_pairi<br>ngs | positio<br>n |
|---------------|--------------|------------|-------|------|--------------|------|----------------|-----------------|---------------------------|------------------------------------------|--------------|
| hsa-miR-11400 | NM_001242878 | ELP2       | 7327  | 7353 | 1            | 1    | 0.25           | 0.09            | 26                        | 8                                        | 3UTR         |
| hsa-miR-11400 | NM_001242879 | ELP2       | 7327  | 7353 | 1            | 1    | 0.00           | 0.00            | 26                        | 8                                        | 3UTR         |
| hsa-miR-11400 | NM_001142288 | EMC8       | 651   | 689  | 1            | 1    | 0.20           | -0.05           | 38                        | 10                                       | 3UTR         |
| hsa-miR-11400 | NM_016242    | EMCN       | 3099  | 3124 | 1            | 1    | 2.01           | 2.10            | 20                        | 10                                       | 3UTR         |
| hsa-miR-11400 | NM_001159694 | EMCN       | 3060  | 3085 | 1            | 1    | 1.51           | 1.51            | 20                        | 10                                       | 3UTR         |
| hsa-miR-11400 | NM_133455    | EMID1      | 1724  | 1744 | 0.980769     | 1    | -0.29          | -0.22           | 20                        | 11                                       | 3UTR         |
| hsa-miR-11400 | XM_005261328 | EMID1      | 1712  | 1732 | 0.980769     | 1    | 0.00           | 0.00            | 20                        | 11                                       | 3UTR         |
| hsa-miR-11400 | NM_133455    | EMID1      | 2026  | 2048 | 1            | 1    | 0.00           | -0.20           | 22                        | 10                                       | 3UTR         |
| hsa-miR-11400 | XM_005261328 | EMID1      | 2014  | 2036 | 1            | 1    | 0.00           | 0.00            | 22                        | 10                                       | 3UTR         |
| hsa-miR-11400 | XM_011536540 | EML1       | 3203  | 3235 | 1            | 1    | 0.00           | 0.00            | 18                        | 13                                       | 3UTR         |
| hsa-miR-11400 | NM_004434    | EML1       | 3140  | 3157 | 1            | 1    | 0.41           | -0.04           | 17                        | 13                                       | 3UTR         |
| hsa-miR-11400 | NM_001008707 | EML1       | 3197  | 3214 | 1            | 1    | 0.41           | -0.04           | 17                        | 13                                       | 3UTR         |
| hsa-miR-11400 | XM_024448315 | ENAH       | 8459  | 8480 | 1            | 1    | 0.00           | 0.00            | 21                        | 9                                        | 3UTR         |
| hsa-miR-11400 | NM_001008493 | ENAH       | 7801  | 7822 | 1            | 1    | 0.18           | -0.01           | 21                        | 9                                        | 3UTR         |
| hsa-miR-11400 | NM_015036    | ENDOD1     | 3396  | 3418 | 1            | 1    | 0.25           | 0.19            | 22                        | 9                                        | 3UTR         |
| hsa-miR-11400 | NM_001977    | ENPEP      | 6512  | 6534 | 1            | 1    | -0.04          | 0.27            | 22                        | 14                                       | 3UTR         |
| hsa-miR-11400 | NM_207045    | ENSA       | 929   | 952  | 1            | 1    | 1.68           | 0.90            | 23                        | 7                                        | 3UTR         |

| mirnaid       | refseqid     | genesymbol | start | end  | binding<br>p | seed | phylopste<br>m | phylopflan<br>k | binding_region_lengt<br>h | longest_<br>consecut<br>ive_pairi<br>ngs | positio<br>n |
|---------------|--------------|------------|-------|------|--------------|------|----------------|-----------------|---------------------------|------------------------------------------|--------------|
| hsa-miR-11400 | NM_207046    | ENSA       | 881   | 904  | 1            | 1    | 0.97           | 1.56            | 23                        | 7                                        | 3UTR         |
| hsa-miR-11400 | NM_004436    | ENSA       | 1001  | 1024 | 1            | 1    | 2.38           | 3.63            | 23                        | 7                                        | 3UTR         |
| hsa-miR-11400 | NM_001128930 | ENTPD4     | 2351  | 2376 | 1            | 1    | 1.09           | 0.11            | 25                        | 6                                        | 3UTR         |
| hsa-miR-11400 | XM_024452480 | EOLA1      | 2598  | 2620 | 1            | 1    | 0.00           | 0.00            | 22                        | 7                                        | 3UTR         |
| hsa-miR-11400 | XM_024452480 | EOLA1      | 3544  | 3560 | 1            | 1    | 0.00           | 0.00            | 16                        | 15                                       | 3UTR         |
| hsa-miR-11400 | NM_001324276 | EOLA1      | 3579  | 3595 | 1            | 1    | 0.02           | -0.17           | 16                        | 15                                       | 3UTR         |
| hsa-miR-11400 | NM_001171909 | EOLA1      | 3545  | 3561 | 1            | 1    | 0.02           | -0.17           | 16                        | 15                                       | 3UTR         |
| hsa-miR-11400 | XM_011531181 | EOLA2      | 2605  | 2627 | 1            | 1    | 0.00           | 0.00            | 22                        | 7                                        | 3UTR         |
| hsa-miR-11400 | XM_011531181 | EOLA2      | 3551  | 3567 | 1            | 1    | 0.00           | 0.00            | 16                        | 15                                       | 3UTR         |
| hsa-miR-11400 | NM_005233    | EPHA3      | 3524  | 3559 | 1            | 1    | 0.81           | 0.34            | 35                        | 9                                        | 3UTR         |
| hsa-miR-11400 | NM_001363748 | EPHA4      | 2984  | 3032 | 1            | 1    | 0.95           | 1.44            | 23                        | 11                                       | 3UTR         |
| hsa-miR-11400 | NM_001309193 | EPHB2      | 9451  | 9473 | 1            | 1    | 0.09           | 0.16            | 22                        | 8                                        | 3UTR         |
| hsa-miR-11400 | NM_017449    | EPHB2      | 9544  | 9566 | 1            | 1    | 0.09           | 0.16            | 22                        | 8                                        | 3UTR         |
| hsa-miR-11400 | NM_004442    | EPHB2      | 9548  | 9570 | 1            | 1    | 0.09           | 0.16            | 22                        | 8                                        | 3UTR         |
| hsa-miR-11400 | XM_011536116 | EPM2A      | 2160  | 2203 | 1            | 1    | 0.00           | 0.00            | 17                        | 8                                        | 3UTR         |
| hsa-miR-11400 | NM_001360057 | EPM2A      | 2234  | 2250 | 1            | 1    | 3.34           | 3.80            | 16                        | 8                                        | 3UTR         |
| hsa-miR-11400 | NM_014805    | EPM2AIP1   | 4049  | 4068 | 0.961538     | 1    | 0.27           | 1.02            | 19                        | 13                                       | 3UTR         |

| mirnaid       | refseqid     | genesymbol | start | end  | binding<br>p | seed | phylopste<br>m | phylopflan<br>k | binding_region_lengt<br>h | longest_<br>consecut<br>ive_pairi<br>ngs | positio<br>n |
|---------------|--------------|------------|-------|------|--------------|------|----------------|-----------------|---------------------------|------------------------------------------|--------------|
| hsa-miR-11400 | NM_014805    | EPM2AIP1   | 6352  | 6406 | 1            | 1    | 2.12           | 1.56            | 22                        | 11                                       | 3UTR         |
| hsa-miR-11400 | NM_001042599 | ERBB4      | 4097  | 4121 | 1            | 1    | 1.82           | 0.85            | 24                        | 14                                       | 3UTR         |
| hsa-miR-11400 | NM_020207    | ERCC6L2    | 9925  | 9946 | 0.972222     | 1    | -0.06          | -0.08           | 21                        | 12                                       | 3UTR         |
| hsa-miR-11400 | NM_182918    | ERG        | 2608  | 2634 | 1            | 1    | 0.39           | 0.28            | 26                        | 6                                        | 3UTR         |
| hsa-miR-11400 | NM_004449    | ERG        | 4856  | 4875 | 1            | 1    | 0.48           | 0.64            | 19                        | 10                                       | 3UTR         |
| hsa-miR-11400 | NM_001331025 | ERG        | 2536  | 2562 | 1            | 1    | -0.13          | 0.42            | 26                        | 6                                        | 3UTR         |
| hsa-miR-11400 | NM_001136154 | ERG        | 4928  | 4947 | 1            | 1    | 0.48           | 0.64            | 19                        | 10                                       | 3UTR         |
| hsa-miR-11400 | NM_001243428 | ERG        | 4951  | 4970 | 1            | 1    | 0.22           | 0.65            | 19                        | 10                                       | 3UTR         |
| hsa-miR-11400 | NM_001243429 | ERG        | 4515  | 4534 | 1            | 1    | 2.08           | 3.11            | 19                        | 10                                       | 3UTR         |
| hsa-miR-11400 | NM_001100626 | ERLIN1     | 1796  | 1813 | 1            | 1    | 2.01           | 2.01            | 17                        | 10                                       | 3UTR         |
| hsa-miR-11400 | NM_001433    | ERN1       | 3188  | 3207 | 1            | 1    | -0.08          | 0.06            | 19                        | 11                                       | 3UTR         |
| hsa-miR-11400 | NM_001034025 | ERP29      | 479   | 501  | 1            | 1    | 1.44           | 2.31            | 22                        | 6                                        | 3UTR         |
| hsa-miR-11400 | NM_015051    | ERP44      | 2105  | 2126 | 1            | 1    | 1.55           | 1.64            | 21                        | 12                                       | 3UTR         |
| hsa-miR-11400 | NM_018948    | ERRFI1     | 2749  | 2773 | 1            | 1    | 1.47           | 1.94            | 24                        | 10                                       | 3UTR         |
| hsa-miR-11400 | NM_194312    | ESPNL      | 4392  | 4415 | 1            | 1    | 1.82           | 1.60            | 23                        | 9                                        | 3UTR         |
| hsa-miR-11400 | NM_000125    | ESR1       | 3091  | 3126 | 1            | 1    | -0.18          | -0.12           | 24                        | 8                                        | 3UTR         |
| hsa-miR-11400 | NM_001122741 | ESR1       | 3046  | 3081 | 1            | 1    | -0.18          | -0.12           | 24                        | 8                                        | 3UTR         |

| mirnaid       | refseqid     | genesymbol | start | end  | binding<br>p | seed | phylopste<br>m | phylopflan<br>k | binding_region_lengt<br>h | longest_<br>consecut<br>ive_pairi<br>ngs | positio<br>n |
|---------------|--------------|------------|-------|------|--------------|------|----------------|-----------------|---------------------------|------------------------------------------|--------------|
| hsa-miR-11400 | NM_001122742 | ESR1       | 3199  | 3234 | 1            | 1    | -0.18          | -0.12           | 24                        | 8                                        | 3UTR         |
| hsa-miR-11400 | NM_001271877 | ESR2       | 1435  | 1455 | 0.980769     | 1    | 1.74           | 2.35            | 20                        | 14                                       | 3UTR         |
| hsa-miR-11400 | NM_024939    | ESRP2      | 2713  | 2733 | 1            | 1    | 2.78           | 2.44            | 20                        | 7                                        | 3UTR         |
| hsa-miR-11400 | NM_001365264 | ESRP2      | 2743  | 2763 | 1            | 1    | 2.78           | 2.44            | 20                        | 7                                        | 3UTR         |
| hsa-miR-11400 | NM_001282450 | ESRRA      | 2489  | 2508 | 1            | 1    | 0.00           | 0.00            | 19                        | 10                                       | 3UTR         |
| hsa-miR-11400 | NM_001282451 | ESRRA      | 2128  | 2147 | 1            | 1    | 1.90           | 2.51            | 19                        | 10                                       | 3UTR         |
| hsa-miR-11400 | NM_004451    | ESRRA      | 2131  | 2150 | 1            | 1    | 2.32           | 2.36            | 19                        | 10                                       | 3UTR         |
| hsa-miR-11400 | NM_001379180 | ESRRB      | 1821  | 1844 | 1            | 1    | 1.42           | 1.07            | 23                        | 11                                       | 3UTR         |
| hsa-miR-11400 | NM_001243518 | ESRRG      | 2937  | 2958 | 1            | 1    | 3.65           | 3.11            | 21                        | 8                                        | 3UTR         |
| hsa-miR-11400 | NM_001243519 | ESRRG      | 3087  | 3108 | 1            | 1    | 3.43           | 3.35            | 21                        | 8                                        | 3UTR         |
| hsa-miR-11400 | NM_031913    | ESYT3      | 4315  | 4336 | 1            | 1    | 0.02           | 0.33            | 21                        | 12                                       | 3UTR         |
| hsa-miR-11400 | NM_001256302 | ETF1       | 3801  | 3822 | 1            | 1    | 3.86           | 2.76            | 21                        | 8                                        | 3UTR         |
| hsa-miR-11400 | NM_001282185 | ETF1       | 3551  | 3572 | 1            | 1    | 0.50           | 0.31            | 21                        | 8                                        | 3UTR         |
| hsa-miR-11400 | NM_004730    | ETF1       | 3602  | 3623 | 1            | 1    | 3.86           | 2.76            | 21                        | 8                                        | 3UTR         |
| hsa-miR-11400 | NM_005238    | ETS1       | 3098  | 3120 | 1            | 1    | 0.00           | 0.00            | 22                        | 8                                        | 3UTR         |
| hsa-miR-11400 | NM_001261439 | ETV4       | 1224  | 1245 | 1            | 1    | 3.24           | 2.65            | 21                        | 7                                        | 3UTR         |
| hsa-miR-11400 | NM_016135    | ETV7       | 1266  | 1282 | 1            | 1    | 1.03           | 2.61            | 16                        | 15                                       | 3UTR         |

| mirnaid       | refseqid     | genesymbol | start | end  | binding<br>p | seed | phylopste<br>m | phylopflan<br>k | binding_region_lengt<br>h | longest_<br>consecut<br>ive_pairi<br>ngs | positio<br>n |
|---------------|--------------|------------|-------|------|--------------|------|----------------|-----------------|---------------------------|------------------------------------------|--------------|
| hsa-miR-11400 | NM_001207036 | ETV7       | 1101  | 1117 | 1            | 1    | 0.00           | 0.00            | 16                        | 15                                       | 3UTR         |
| hsa-miR-11400 | NM_001207037 | ETV7       | 1307  | 1323 | 1            | 1    | 2.69           | 2.28            | 16                        | 15                                       | 3UTR         |
| hsa-miR-11400 | NM_001207040 | ETV7       | 1130  | 1146 | 1            | 1    | 1.36           | 1.25            | 16                        | 15                                       | 3UTR         |
| hsa-miR-11400 | NM_001207041 | ETV7       | 965   | 981  | 1            | 1    | 0.22           | 0.18            | 16                        | 15                                       | 3UTR         |
| hsa-miR-11400 | NM_001308248 | EVI5       | 5182  | 5204 | 1            | 1    | 4.03           | 3.53            | 17                        | 11                                       | 3UTR         |
| hsa-miR-11400 | NM_005665    | EVI5       | 5149  | 5171 | 1            | 1    | 2.40           | 2.99            | 17                        | 11                                       | 3UTR         |
| hsa-miR-11400 | XM_005267272 | EXOC5      | 2544  | 2572 | 1            | 1    | 0.00           | 0.00            | 28                        | 8                                        | 3UTR         |
| hsa-miR-11400 | NM_006544    | EXOC5      | 2465  | 2493 | 1            | 1    | 0.16           | 0.65            | 28                        | 8                                        | 3UTR         |
| hsa-miR-11400 | NM_001282313 | EXOC7      | 2586  | 2604 | 1            | 1    | 0.66           | 0.33            | 18                        | 6                                        | 3UTR         |
| hsa-miR-11400 | NM_001308019 | EXPH5      | 6837  | 6853 | 1            | 1    | 0.79           | -0.09           | 16                        | 15                                       | 3UTR         |
| hsa-miR-11400 | NM_015065    | EXPH5      | 7055  | 7071 | 1            | 1    | -0.31          | 0.60            | 16                        | 15                                       | 3UTR         |
| hsa-miR-11400 | NM_001144763 | EXPH5      | 6914  | 6930 | 1            | 1    | 1.30           | 0.05            | 16                        | 15                                       | 3UTR         |
| hsa-miR-11400 | XM_017024350 | EZH1       | 2909  | 2927 | 1            | 1    | 0.00           | 0.00            | 18                        | 12                                       | 3UTR         |
| hsa-miR-11400 | NM_001991    | EZH1       | 3026  | 3044 | 1            | 1    | 3.21           | 4.16            | 18                        | 12                                       | 3UTR         |
| hsa-miR-11400 | NM_003379    | EZR        | 2404  | 2444 | 0.961538     | 1    | 4.71           | 4.17            | 40                        | 10                                       | 3UTR         |
| hsa-miR-11400 | NM_001111077 | EZR        | 2387  | 2427 | 0.961538     | 1    | 5.19           | 5.03            | 40                        | 10                                       | 3UTR         |
| hsa-miR-11400 | NM_001312675 | F10        | 1180  | 1217 | 1            | 1    | 2.75           | 2.82            | 37                        | 8                                        | 3UTR         |

| mirnaid       | refseqid         | genesymbol | start | end  | binding<br>p | seed | phylopste<br>m | phylopflan<br>k | binding_region_lengt<br>h | longest_<br>consecut<br>ive_pairi<br>ngs | positio<br>n |
|---------------|------------------|------------|-------|------|--------------|------|----------------|-----------------|---------------------------|------------------------------------------|--------------|
| hsa-miR-11400 | NM_005242        | F2RL1      | 2121  | 2146 | 0.961538     | 1    | 4.72           | 4.43            | 25                        | 8                                        | 3UTR         |
| hsa-miR-11400 | NM_000130        | F5         | 7754  | 7773 | 1            | 1    | 3.78           | 2.65            | 19                        | 6                                        | 3UTR         |
| hsa-miR-11400 | NM_00126755<br>4 | F7         | 1718  | 1744 | 1            | 1    | -0.24          | -0.33           | 26                        | 15                                       | 3UTR         |
| hsa-miR-11400 | NM_00126755<br>4 | F7         | 1832  | 1866 | 1            | 1    | -0.02          | -0.33           | 25                        | 15                                       | 3UTR         |
| hsa-miR-11400 | NM_019616        | F7         | 1904  | 1930 | 1            | 1    | -0.18          | -0.33           | 26                        | 15                                       | 3UTR         |
| hsa-miR-11400 | NM_019616        | F7         | 2028  | 2052 | 1            | 1    | -0.17          | -0.43           | 24                        | 15                                       | 3UTR         |
| hsa-miR-11400 | NM_000131        | F7         | 1973  | 1999 | 1            | 1    | -0.18          | -0.33           | 26                        | 15                                       | 3UTR         |
| hsa-miR-11400 | NM_000131        | F7         | 2097  | 2121 | 1            | 1    | -0.17          | -0.43           | 24                        | 15                                       | 3UTR         |
| hsa-miR-11400 | NM_00125694<br>6 | FAAP20     | 1256  | 1275 | 1            | 1    | -0.10          | -0.28           | 19                        | 9                                        | 3UTR         |
| hsa-miR-11400 | NM_000134        | FABP2      | 803   | 819  | 0.969231     | 1    | 0.35           | -0.01           | 16                        | 13                                       | 3UTR         |
| hsa-miR-11400 | XM_01154502<br>2 | FADS1      | 1910  | 1931 | 1            | 1    | 0.00           | 0.00            | 21                        | 8                                        | 3UTR         |
| hsa-miR-11400 | NM_013402        | FADS1      | 2182  | 2203 | 1            | 1    | 0.14           | 0.12            | 21                        | 8                                        | 3UTR         |
| hsa-miR-11400 | XM_01700423<br>6 | FAHD2A     | 3003  | 3024 | 1            | 1    | 0.00           | 0.00            | 21                        | 10                                       | 3UTR         |
| hsa-miR-11400 | XM_00526873<br>0 | FAIM2      | 1356  | 1377 | 1            | 1    | 0.00           | 0.00            | 21                        | 17                                       | 3UTR         |
| hsa-miR-11400 | NM_012306        | FAIM2      | 1536  | 1557 | 1            | 1    | -0.01          | -0.07           | 21                        | 17                                       | 3UTR         |
| hsa-miR-11400 | NM_00128271<br>3 | FAM107A    | 2856  | 2872 | 1            | 1    | 0.76           | 3.16            | 16                        | 15                                       | 3UTR         |
| hsa-miR-11400 | NM_007177        | FAM107A    | 2880  | 2896 | 1            | 1    | 3.47           | 1.18            | 16                        | 15                                       | 3UTR         |



| mirnaid       | refseqid     | genesymbol | start | end  | binding<br>p | seed | phylopste<br>m | phylopflan<br>k | binding_region_lengt<br>h | longest_<br>consecut<br>ive_pairi<br>ngs | positio<br>n |
|---------------|--------------|------------|-------|------|--------------|------|----------------|-----------------|---------------------------|------------------------------------------|--------------|
| hsa-miR-11400 | NM_198947    | FAM111B    | 3117  | 3150 | 1            | 1    | 0.07           | 0.00            | 21                        | 9                                        | 3UTR         |
| hsa-miR-11400 | NM_001142703 | FAM111B    | 2950  | 2983 | 1            | 1    | 0.07           | 0.00            | 21                        | 9                                        | 3UTR         |
| hsa-miR-11400 | NM_001317994 | FAM114A2   | 4161  | 4181 | 1            | 1    | 0.97           | 1.74            | 20                        | 10                                       | 3UTR         |
| hsa-miR-11400 | NM_001317995 | FAM114A2   | 3387  | 3407 | 1            | 1    | 2.60           | 2.49            | 20                        | 10                                       | 3UTR         |
| hsa-miR-11400 | NM_001286379 | FAM120B    | 4267  | 4285 | 1            | 1    | -0.40          | -0.16           | 18                        | 17                                       | 3UTR         |
| hsa-miR-11400 | NM_001286380 | FAM120B    | 4024  | 4048 | 1            | 1    | -0.02          | -0.30           | 19                        | 17                                       | 3UTR         |
| hsa-miR-11400 | NM_001286381 | FAM120B    | 2040  | 2064 | 1            | 1    | 0.42           | -0.43           | 19                        | 17                                       | 3UTR         |
| hsa-miR-11400 | NM_032448    | FAM120B    | 3976  | 4000 | 1            | 1    | -0.02          | -0.30           | 19                        | 17                                       | 3UTR         |
| hsa-miR-11400 | NM_024785    | FAM124B    | 2019  | 2045 | 0.953846     | 1    | 2.97           | 2.35            | 21                        | 12                                       | 3UTR         |
| hsa-miR-11400 | NM_001122779 | FAM124B    | 1894  | 1920 | 0.953846     | 1    | 2.97           | 2.35            | 21                        | 12                                       | 3UTR         |
| hsa-miR-11400 | NM_024785    | FAM124B    | 2081  | 2104 | 1            | 1    | 3.28           | 1.69            | 23                        | 10                                       | 3UTR         |
| hsa-miR-11400 | NM_001122779 | FAM124B    | 1956  | 1979 | 1            | 1    | 3.28           | 1.69            | 23                        | 10                                       | 3UTR         |
| hsa-miR-11400 | NM_032581    | FAM126A    | 3142  | 3165 | 1            | 1    | -0.06          | 0.36            | 23                        | 10                                       | 3UTR         |
| hsa-miR-11400 | NM_001363466 | FAM126A    | 3438  | 3461 | 1            | 1    | 0.19           | 0.15            | 23                        | 10                                       | 3UTR         |
| hsa-miR-11400 | NM_173698    | FAM133A    | 1598  | 1637 | 1            | 1    | 0.90           | 1.27            | 18                        | 7                                        | 3UTR         |
| hsa-miR-11400 | NM_001171111 | FAM133A    | 1529  | 1568 | 1            | 1    | -0.09          | 0.30            | 18                        | 7                                        | 3UTR         |
| hsa-miR-11400 | NM_001040057 | FAM133B    | 1611  | 1627 | 1            | 1    | 1.40           | 3.00            | 16                        | 8                                        | 3UTR         |

| mirnaid       | refseqid     | genesymbol | start | end  | binding<br>p | seed | phylopste<br>m | phylopflan<br>k | binding_region_lengt<br>h | longest_<br>consecut<br>ive_pairi<br>ngs | positio<br>n |
|---------------|--------------|------------|-------|------|--------------|------|----------------|-----------------|---------------------------|------------------------------------------|--------------|
| hsa-miR-11400 | NM_001329755 | FAM136A    | 1300  | 1323 | 1            | 1    | 0.94           | 1.80            | 23                        | 9                                        | 3UTR         |
| hsa-miR-11400 | NM_001265578 | FAM13A     | 2986  | 3010 | 1            | 1    | 2.29           | 3.66            | 24                        | 7                                        | 3UTR         |
| hsa-miR-11400 | NM_001265579 | FAM13A     | 2944  | 2968 | 1            | 1    | 2.75           | 3.20            | 24                        | 7                                        | 3UTR         |
| hsa-miR-11400 | NM_001265580 | FAM13A     | 2944  | 2968 | 1            | 1    | 2.75           | 3.20            | 24                        | 7                                        | 3UTR         |
| hsa-miR-11400 | NM_014883    | FAM13A     | 3999  | 4023 | 1            | 1    | 1.52           | 2.98            | 24                        | 7                                        | 3UTR         |
| hsa-miR-11400 | NM_001015045 | FAM13A     | 3028  | 3052 | 1            | 1    | 4.15           | 5.30            | 24                        | 7                                        | 3UTR         |
| hsa-miR-11400 | NM_205548    | FAM151B    | 1280  | 1326 | 1            | 1    | -0.05          | 0.42            | 20                        | 9                                        | 3UTR         |
| hsa-miR-11400 | XM_017009358 | FAM153A    | 2322  | 2353 | 0.974359     | 1    | 0.00           | 0.00            | 19                        | 11                                       | 3UTR         |
| hsa-miR-11400 | XM_011532224 | FAM160A1   | 7275  | 7293 | 1            | 1    | 0.00           | 0.00            | 18                        | 9                                        | 3UTR         |
| hsa-miR-11400 | NM_001109977 | FAM160A1   | 7776  | 7794 | 1            | 1    | 0.00           | -0.26           | 18                        | 9                                        | 3UTR         |
| hsa-miR-11400 | NM_001371529 | FAM163B    | 851   | 885  | 1            | 1    | -1.45          | -0.61           | 20                        | 10                                       | 3UTR         |
| hsa-miR-11400 | NM_053279    | FAM167A    | 2954  | 2973 | 1            | 1    | 4.73           | 4.67            | 19                        | 8                                        | 3UTR         |
| hsa-miR-11400 | XM_011543837 | FAM167A    | 1813  | 1833 | 1            | 1    | 0.00           | 0.00            | 20                        | 12                                       | 3UTR         |
| hsa-miR-11400 | XM_011543837 | FAM167A    | 3049  | 3068 | 1            | 1    | 0.00           | 0.00            | 19                        | 8                                        | 3UTR         |
| hsa-miR-11400 | XM_011543840 | FAM167A    | 1634  | 1654 | 1            | 1    | 0.00           | 0.00            | 20                        | 12                                       | 3UTR         |
| hsa-miR-11400 | XM_011543840 | FAM167A    | 2870  | 2889 | 1            | 1    | 0.00           | 0.00            | 19                        | 8                                        | 3UTR         |
| hsa-miR-11400 | NM_182562    | FAM169B    | 1249  | 1283 | 1            | 1    | -0.07          | -0.27           | 19                        | 13                                       | 3UTR         |

| mirnaid       | refseqid     | genesymbol | start | end  | binding<br>p | seed | phylopste<br>m | phylopflan<br>k | binding_region_lengt<br>h | longest_<br>consecut<br>ive_pairi<br>ngs | positio<br>n |
|---------------|--------------|------------|-------|------|--------------|------|----------------|-----------------|---------------------------|------------------------------------------|--------------|
| hsa-miR-11400 | NM_182562    | FAM169B    | 1289  | 1323 | 1            | 1    | -0.11          | -0.24           | 19                        | 13                                       | 3UTR         |
| hsa-miR-11400 | XM_017001280 | FAM177B    | 2615  | 2634 | 1            | 1    | 0.00           | 0.00            | 19                        | 9                                        | 3UTR         |
| hsa-miR-11400 | NM_001324080 | FAM177B    | 1344  | 1363 | 1            | 1    | 0.00           | -0.01           | 19                        | 9                                        | 3UTR         |
| hsa-miR-11400 | NM_001101376 | FAM183A    | 496   | 507  | 1            | 1    | -0.09          | -0.10           | 11                        | 10                                       | 3UTR         |
| hsa-miR-11400 | NM_207318    | FAM199X    | 1779  | 1791 | 1            | 1    | 0.20           | 0.72            | 12                        | 11                                       | 3UTR         |
| hsa-miR-11400 | NM_001321920 | FAM219B    | 683   | 698  | 1            | 1    | 0.30           | -0.12           | 15                        | 14                                       | 3UTR         |
| hsa-miR-11400 | NM_001321922 | FAM219B    | 1220  | 1235 | 1            | 1    | -0.22          | -0.19           | 15                        | 14                                       | 3UTR         |
| hsa-miR-11400 | NM_001013647 | FAM227A    | 3966  | 3993 | 1            | 1    | 0.48           | 0.13            | 27                        | 10                                       | 3UTR         |
| hsa-miR-11400 | NM_001384237 | FAM237B    | 1868  | 1895 | 1            | 1    | 0.48           | 0.47            | 16                        | 14                                       | 3UTR         |
| hsa-miR-11400 | NM_174951    | FAM9A      | 1359  | 1394 | 1            | 1    | 0.00           | 0.00            | 21                        | 8                                        | 3UTR         |
| hsa-miR-11400 | NM_001171186 | FAM9A      | 1384  | 1419 | 1            | 1    | 0.00           | 0.00            | 21                        | 8                                        | 3UTR         |
| hsa-miR-11400 | NM_001286839 | FARP1      | 4503  | 4521 | 1            | 1    | -0.02          | -0.13           | 18                        | 17                                       | 3UTR         |
| hsa-miR-11400 | XM_011521046 | FARP1      | 4709  | 4727 | 1            | 1    | 0.00           | 0.00            | 18                        | 17                                       | 3UTR         |
| hsa-miR-11400 | NM_005766    | FARP1      | 4620  | 4638 | 1            | 1    | -0.02          | -0.13           | 18                        | 17                                       | 3UTR         |
| hsa-miR-11400 | NM_032385    | FAXDC2     | 1649  | 1670 | 1            | 1    | 0.30           | -0.31           | 21                        | 12                                       | 3UTR         |
| hsa-miR-11400 | NM_006485    | FBLN1      | 2174  | 2192 | 1            | 1    | -0.19          | -0.32           | 18                        | 8                                        | 3UTR         |
| hsa-miR-11400 | NM_001105079 | FBRS       | 4226  | 4242 | 0.980769     | 1    | 1.53           | 0.63            | 16                        | 15                                       | 3UTR         |

| mirnaid       | refseqid     | genesymbol | start | end  | binding<br>p | seed | phylopste<br>m | phylopflan<br>k | binding_region_lengt<br>h | longest_<br>consecut<br>ive_pairi<br>ngs | positio<br>n |
|---------------|--------------|------------|-------|------|--------------|------|----------------|-----------------|---------------------------|------------------------------------------|--------------|
| hsa-miR-11400 | NM_001316939 | FBXL12     | 1741  | 1761 | 1            | 1    | -0.30          | -0.70           | 20                        | 10                                       | 3UTR         |
| hsa-miR-11400 | NM_001316940 | FBXL12     | 1619  | 1639 | 1            | 1    | -0.30          | -0.70           | 20                        | 10                                       | 3UTR         |
| hsa-miR-11400 | NM_017703    | FBXL12     | 1723  | 1743 | 1            | 1    | -0.30          | -0.70           | 20                        | 10                                       | 3UTR         |
| hsa-miR-11400 | NM_001282351 | FBXL19     | 3452  | 3473 | 1            | 1    | 1.70           | 1.42            | 21                        | 12                                       | 3UTR         |
| hsa-miR-11400 | NM_001382779 | FBXL19     | 4278  | 4299 | 1            | 1    | 1.70           | 1.42            | 21                        | 12                                       | 3UTR         |
| hsa-miR-11400 | NM_001382781 | FBXL19     | 4149  | 4170 | 1            | 1    | 1.70           | 1.42            | 21                        | 12                                       | 3UTR         |
| hsa-miR-11400 | NM_001099784 | FBXL19     | 3584  | 3605 | 1            | 1    | 1.70           | 1.42            | 21                        | 12                                       | 3UTR         |
| hsa-miR-11400 | NM_032875    | FBXL20     | 4520  | 4539 | 1            | 1    | -0.12          | -0.06           | 19                        | 14                                       | 3UTR         |
| hsa-miR-11400 | NM_001370208 | FBXL20     | 4638  | 4657 | 1            | 1    | -0.28          | 0.48            | 19                        | 14                                       | 3UTR         |
| hsa-miR-11400 | NM_001184906 | FBXL20     | 4424  | 4443 | 1            | 1    | -0.02          | -0.18           | 19                        | 14                                       | 3UTR         |
| hsa-miR-11400 | NM_001278716 | FBXL4      | 7122  | 7138 | 1            | 1    | 5.77           | 4.96            | 16                        | 15                                       | 3UTR         |
| hsa-miR-11400 | NM_001278317 | FBXL7      | 2383  | 2419 | 1            | 1    | -0.23          | -0.11           | 22                        | 8                                        | 3UTR         |
| hsa-miR-11400 | XM_011513998 | FBXL7      | 2174  | 2210 | 1            | 1    | 0.00           | 0.00            | 22                        | 8                                        | 3UTR         |
| hsa-miR-11400 | NM_012304    | FBXL7      | 2646  | 2667 | 1            | 1    | -0.28          | -0.01           | 21                        | 8                                        | 3UTR         |
| hsa-miR-11400 | NM_033624    | FBXO21     | 2173  | 2206 | 1            | 1    | 0.49           | 0.61            | 21                        | 9                                        | 3UTR         |
| hsa-miR-11400 | XM_017019038 | FBXO21     | 1973  | 2006 | 1            | 1    | 0.00           | 0.00            | 21                        | 9                                        | 3UTR         |
| hsa-miR-11400 | NM_015002    | FBXO21     | 2152  | 2185 | 1            | 1    | 0.90           | 0.90            | 21                        | 9                                        | 3UTR         |

| mirnaid       | refseqid     | genesymbol | start | end  | binding<br>p | seed | phylopste<br>m | phylopflan<br>k | binding_region_lengt<br>h | longest_<br>consecut<br>ive_pairi<br>ngs | positio<br>n |
|---------------|--------------|------------|-------|------|--------------|------|----------------|-----------------|---------------------------|------------------------------------------|--------------|
| hsa-miR-11400 | NM_147188    | FBXO22     | 9527  | 9547 | 1            | 1    | 0.05           | 0.09            | 20                        | 12                                       | 3UTR         |
| hsa-miR-11400 | NM_183420    | FBXO25     | 4233  | 4252 | 1            | 1    | -0.06          | -0.44           | 19                        | 9                                        | 3UTR         |
| hsa-miR-11400 | NM_183421    | FBXO25     | 4260  | 4279 | 1            | 1    | -0.06          | -0.44           | 19                        | 9                                        | 3UTR         |
| hsa-miR-11400 | NM_012173    | FBXO25     | 4183  | 4202 | 1            | 1    | 0.00           | 0.00            | 19                        | 9                                        | 3UTR         |
| hsa-miR-11400 | NM_178820    | FBXO27     | 1466  | 1486 | 1            | 1    | 0.71           | 1.14            | 20                        | 10                                       | 3UTR         |
| hsa-miR-11400 | NM_015176    | FBXO28     | 1147  | 1165 | 1            | 1    | 0.38           | 1.59            | 18                        | 8                                        | 3UTR         |
| hsa-miR-11400 | NM_001136115 | FBXO28     | 951   | 969  | 1            | 1    | 0.38           | 1.59            | 18                        | 8                                        | 3UTR         |
| hsa-miR-11400 | NM_001257990 | FBXO7      | 1692  | 1731 | 1            | 1    | 0.27           | 0.07            | 20                        | 10                                       | 3UTR         |
| hsa-miR-11400 | NM_012179    | FBXO7      | 1875  | 1914 | 1            | 1    | 0.16           | 0.11            | 20                        | 10                                       | 3UTR         |
| hsa-miR-11400 | NM_001033024 | FBXO7      | 1540  | 1579 | 1            | 1    | 0.27           | 0.07            | 20                        | 10                                       | 3UTR         |
| hsa-miR-11400 | NM_012180    | FBXO8      | 1452  | 1478 | 1            | 1    | 5.92           | 5.35            | 26                        | 9                                        | 3UTR         |
| hsa-miR-11400 | NM_032029    | FCAMR      | 1269  | 1289 | 1            | 1    | 0.51           | 0.44            | 20                        | 7                                        | 3UTR         |
| hsa-miR-11400 | NM_001122979 | FCAMR      | 1186  | 1206 | 1            | 1    | 0.41           | 0.09            | 20                        | 7                                        | 3UTR         |
| hsa-miR-11400 | NM_015962    | FCF1       | 2972  | 3027 | 1            | 1    | 0.03           | -0.31           | 26                        | 8                                        | 3UTR         |
| hsa-miR-11400 | NM_001318508 | FCF1       | 3031  | 3086 | 1            | 1    | 0.03           | -0.31           | 26                        | 8                                        | 3UTR         |
| hsa-miR-11400 | NM_001271037 | FCGR3B     | 845   | 863  | 1            | 1    | -0.54          | -0.20           | 18                        | 7                                        | 3UTR         |
| hsa-miR-11400 | XM_005268524 | FCHSD1     | 2140  | 2160 | 1            | 1    | 0.00           | 0.00            | 20                        | 8                                        | 3UTR         |

| mirnaid       | refseqid     | genesymbol | start | end   | binding<br>p | seed | phylopste<br>m | phylopflan<br>k | binding_region_lengt<br>h | longest_<br>consecut<br>ive_pairi<br>ngs | positio<br>n |
|---------------|--------------|------------|-------|-------|--------------|------|----------------|-----------------|---------------------------|------------------------------------------|--------------|
| hsa-miR-11400 | NM_001142473 | FCMR       | 1948  | 1991  | 0.980769     | 1    | -0.43          | 0.74            | 20                        | 12                                       | 3UTR         |
| hsa-miR-11400 | NM_005449    | FCMR       | 2298  | 2327  | 1            | 1    | 0.27           | 0.16            | 20                        | 12                                       | 3UTR         |
| hsa-miR-11400 | NM_001193338 | FCMR       | 2167  | 2196  | 1            | 1    | 0.27           | 0.16            | 20                        | 12                                       | 3UTR         |
| hsa-miR-11400 | NM_004109    | FDX1       | 1750  | 1768  | 1            | 1    | -0.25          | 0.05            | 18                        | 13                                       | 3UTR         |
| hsa-miR-11400 | NM_001371095 | FECH       | 5910  | 5946  | 0.980769     | 1    | 0.32           | -0.08           | 20                        | 12                                       | 3UTR         |
| hsa-miR-11400 | NM_015322    | FEM1B      | 6779  | 6797  | 1            | 1    | 0.33           | 0.60            | 18                        | 14                                       | 3UTR         |
| hsa-miR-11400 | NM_015322    | FEM1B      | 3058  | 3076  | 1            | 1    | 0.07           | 0.11            | 18                        | 8                                        | 3UTR         |
| hsa-miR-11400 | NM_001308031 | FER        | 2855  | 2871  | 1            | 1    | -0.20          | -0.43           | 16                        | 15                                       | 3UTR         |
| hsa-miR-11400 | NM_005246    | FER        | 6742  | 6763  | 1            | 1    | 0.00           | 0.00            | 21                        | 8                                        | 3UTR         |
| hsa-miR-11400 | NM_005246    | FER        | 4201  | 4217  | 1            | 1    | 0.00           | 0.00            | 16                        | 15                                       | 3UTR         |
| hsa-miR-11400 | NM_001024613 | FEZF1      | 2273  | 2290  | 1            | 1    | 2.26           | 1.86            | 17                        | 13                                       | 3UTR         |
| hsa-miR-11400 | NM_001160264 | FEZF1      | 1884  | 1901  | 1            | 1    | 3.16           | 3.39            | 17                        | 13                                       | 3UTR         |
| hsa-miR-11400 | NM_181745    | FFAR4      | 1847  | 1880  | 1            | 1    | -0.01          | 0.09            | 33                        | 10                                       | 3UTR         |
| hsa-miR-11400 | NM_001195755 | FFAR4      | 1799  | 1832  | 1            | 1    | -0.01          | 0.09            | 33                        | 10                                       | 3UTR         |
| hsa-miR-11400 | NM_033642    | FGF13      | 3876  | 3896  | 1            | 1    | -0.13          | 0.08            | 20                        | 11                                       | 3UTR         |
| hsa-miR-11400 | NM_001139498 | FGF13      | 4080  | 4100  | 1            | 1    | 0.16           | 0.05            | 20                        | 11                                       | 3UTR         |
| hsa-miR-11400 | NM_004115    | FGF14      | 11962 | 11979 | 1            | 1    | 3.97           | 1.88            | 17                        | 16                                       | 3UTR         |

| mirnaid       | refseqid     | genesymbol | start | end  | binding<br>p | seed | phylopste<br>m | phylopflan<br>k | binding_region_lengt<br>h | longest_<br>consecut<br>ive_pairi<br>ngs | positio<br>n |
|---------------|--------------|------------|-------|------|--------------|------|----------------|-----------------|---------------------------|------------------------------------------|--------------|
| hsa-miR-11400 | NM_152429    | FGFBP3     | 1249  | 1268 | 1            | 1    | -0.33          | -0.08           | 19                        | 10                                       | 3UTR         |
| hsa-miR-11400 | XM_017013225 | FGFR1      | 4204  | 4229 | 1            | 1    | 0.00           | 0.00            | 25                        | 8                                        | 3UTR         |
| hsa-miR-11400 | NM_023106    | FGFR1      | 4423  | 4448 | 1            | 1    | 4.72           | 3.79            | 25                        | 8                                        | 3UTR         |
| hsa-miR-11400 | NM_001174065 | FGFR1      | 4088  | 4113 | 1            | 1    | 6.54           | 4.21            | 25                        | 8                                        | 3UTR         |
| hsa-miR-11400 | NM_001174067 | FGFR1      | 4248  | 4273 | 1            | 1    | 3.98           | 5.15            | 25                        | 8                                        | 3UTR         |
| hsa-miR-11400 | XM_024454093 | FGFRL1     | 4168  | 4186 | 1            | 1    | 0.00           | 0.00            | 18                        | 10                                       | 3UTR         |
| hsa-miR-11400 | NM_021923    | FGFRL1     | 2807  | 2825 | 1            | 1    | 0.25           | 0.63            | 18                        | 10                                       | 3UTR         |
| hsa-miR-11400 | NM_001370296 | FGFRL1     | 2938  | 2956 | 1            | 1    | 0.25           | 0.63            | 18                        | 10                                       | 3UTR         |
| hsa-miR-11400 | NM_001004356 | FGFRL1     | 3130  | 3148 | 1            | 1    | 0.25           | 0.63            | 18                        | 10                                       | 3UTR         |
| hsa-miR-11400 | NM_001450    | FHL2       | 2629  | 2649 | 1            | 1    | 0.45           | -0.04           | 20                        | 8                                        | 3UTR         |
| hsa-miR-11400 | NM_054014    | FKBP1A     | 762   | 780  | 1            | 1    | 0.90           | 0.93            | 18                        | 17                                       | 3UTR         |
| hsa-miR-11400 | NM_004117    | FKBP5      | 3408  | 3429 | 1            | 1    | 5.68           | 4.00            | 21                        | 11                                       | 3UTR         |
| hsa-miR-11400 | NM_004117    | FKBP5      | 2763  | 2792 | 1            | 1    | 3.62           | 3.72            | 18                        | 11                                       | 3UTR         |
| hsa-miR-11400 | NM_001145775 | FKBP5      | 3593  | 3614 | 1            | 1    | 1.66           | 2.17            | 21                        | 11                                       | 3UTR         |
| hsa-miR-11400 | NM_001135212 | FKBP7      | 2422  | 2442 | 0.980769     | 1    | 0.00           | 0.00            | 20                        | 11                                       | 3UTR         |
| hsa-miR-11400 | NM_006731    | FKTN       | 5123  | 5141 | 1            | 1    | 0.29           | 0.21            | 18                        | 6                                        | 3UTR         |
| hsa-miR-11400 | NM_006731    | FKTN       | 7045  | 7062 | 1            | 1    | -0.07          | 0.29            | 17                        | 7                                        | 3UTR         |

| mirnaid       | refseqid     | genesymbol | start | end   | binding<br>p | seed | phylopste<br>m | phylopflan<br>k | binding_region_lengt<br>h | longest_<br>consecut<br>ive_pairi<br>ngs | positio<br>n |
|---------------|--------------|------------|-------|-------|--------------|------|----------------|-----------------|---------------------------|------------------------------------------|--------------|
| hsa-miR-11400 | NM_001079802 | FKTN       | 5214  | 5232  | 1            | 1    | 0.29           | 0.21            | 18                        | 6                                        | 3UTR         |
| hsa-miR-11400 | NM_001079802 | FKTN       | 7136  | 7153  | 1            | 1    | -0.07          | 0.29            | 17                        | 7                                        | 3UTR         |
| hsa-miR-11400 | NM_001198963 | FKTN       | 2184  | 2201  | 1            | 1    | -0.07          | 0.29            | 17                        | 7                                        | 3UTR         |
| hsa-miR-11400 | NM_013231    | FLRT2      | 26216 | 26238 | 1            | 1    | -0.19          | -0.15           | 22                        | 12                                       | 3UTR         |
| hsa-miR-11400 | NM_001346144 | FLRT2      | 26238 | 26260 | 1            | 1    | -0.19          | -0.15           | 22                        | 12                                       | 3UTR         |
| hsa-miR-11400 | NM_001278638 | FLT3LG     | 866   | 904   | 1            | 1    | 0.40           | 0.04            | 20                        | 10                                       | 3UTR         |
| hsa-miR-11400 | XM_005258681 | FLT3LG     | 842   | 880   | 1            | 1    | 0.00           | 0.00            | 20                        | 10                                       | 3UTR         |
| hsa-miR-11400 | XM_011526682 | FLT3LG     | 862   | 900   | 1            | 1    | 0.00           | 0.00            | 20                        | 10                                       | 3UTR         |
| hsa-miR-11400 | NM_001459    | FLT3LG     | 849   | 887   | 1            | 1    | 0.40           | 0.04            | 20                        | 10                                       | 3UTR         |
| hsa-miR-11400 | NM_001204503 | FLT3LG     | 850   | 888   | 1            | 1    | -0.27          | 0.11            | 20                        | 10                                       | 3UTR         |
| hsa-miR-11400 | NM_001277313 | FMN1       | 5599  | 5650  | 1            | 1    | -0.88          | -0.12           | 15                        | 13                                       | 3UTR         |
| hsa-miR-11400 | XM_011521506 | FMN1       | 5356  | 5407  | 1            | 1    | 0.00           | 0.00            | 15                        | 13                                       | 3UTR         |
| hsa-miR-11400 | XM_017022132 | FMN1       | 5557  | 5617  | 1            | 1    | 0.00           | 0.00            | 15                        | 13                                       | 3UTR         |
| hsa-miR-11400 | NM_001103184 | FMN1       | 4726  | 4786  | 1            | 1    | 0.00           | 0.00            | 15                        | 13                                       | 3UTR         |
| hsa-miR-11400 | NM_175736    | FMNL3      | 7759  | 7780  | 1            | 1    | 1.14           | 0.56            | 21                        | 13                                       | 3UTR         |
| hsa-miR-11400 | NM_198900    | FMNL3      | 7606  | 7627  | 1            | 1    | 4.25           | 2.92            | 21                        | 13                                       | 3UTR         |
| hsa-miR-11400 | NM_001367835 | FMNL3      | 7874  | 7895  | 1            | 1    | 1.40           | 0.66            | 21                        | 13                                       | 3UTR         |



| mirnaid       | refseqid     | genesymbol | start | end  | binding<br>p | seed | phylopste<br>m | phylopflan<br>k | binding_region_lengt<br>h | longest_<br>consecut<br>ive_pairi<br>ngs | positio<br>n |
|---------------|--------------|------------|-------|------|--------------|------|----------------|-----------------|---------------------------|------------------------------------------|--------------|
| hsa-miR-11400 | NM_002023    | FMOD       | 2179  | 2196 | 0.969231     | 1    | 2.23           | 3.26            | 17                        | 11                                       | 3UTR         |
| hsa-miR-11400 | NM_017737    | FNBP1L     | 3450  | 3473 | 0.961538     | 1    | 2.39           | 2.15            | 21                        | 11                                       | 3UTR         |
| hsa-miR-11400 | NM_001024948 | FNBP1L     | 4753  | 4776 | 0.961538     | 1    | 1.81           | 2.14            | 21                        | 11                                       | 3UTR         |
| hsa-miR-11400 | NM_001164473 | FNBP1L     | 3624  | 3647 | 0.961538     | 1    | 1.81           | 2.14            | 21                        | 11                                       | 3UTR         |
| hsa-miR-11400 | NM_001001343 | FNDC9      | 1179  | 1205 | 1            | 1    | 0.22           | -0.19           | 26                        | 11                                       | 3UTR         |
| hsa-miR-11400 | NM_002027    | FNTA       | 1548  | 1565 | 1            | 1    | 0.13           | 0.99            | 17                        | 16                                       | 3UTR         |
| hsa-miR-11400 | XM_006711977 | FOSL2      | 4664  | 4684 | 1            | 1    | 0.00           | 0.00            | 20                        | 8                                        | 3UTR         |
| hsa-miR-11400 | NM_004514    | FO XK2     | 2191  | 2229 | 1            | 1    | 0.51           | 1.27            | 20                        | 10                                       | 3UTR         |
| hsa-miR-11400 | NM_005197    | FOXN3      | 2374  | 2391 | 1            | 1    | 0.90           | 0.39            | 17                        | 16                                       | 3UTR         |
| hsa-miR-11400 | NM_001085471 | FOXN3      | 2215  | 2232 | 1            | 1    | -0.02          | -0.06           | 17                        | 16                                       | 3UTR         |
| hsa-miR-11400 | NM_001368135 | FOXO3B     | 2002  | 2031 | 1            | 1    | 1.48           | 0.90            | 29                        | 10                                       | 3UTR         |
| hsa-miR-11400 | NM_003838    | FPGT       | 2758  | 2782 | 0.961538     | 1    | 0.13           | 0.18            | 24                        | 7                                        | 3UTR         |
| hsa-miR-11400 | NM_001462    | FPR2       | 1281  | 1303 | 1            | 1    | -0.55          | -0.47           | 22                        | 12                                       | 3UTR         |
| hsa-miR-11400 | NM_001005738 | FPR2       | 1203  | 1225 | 1            | 1    | -0.55          | -0.47           | 22                        | 12                                       | 3UTR         |
| hsa-miR-11400 | NM_145246    | FRA10AC1   | 2948  | 2971 | 1            | 1    | 0.58           | -0.06           | 23                        | 9                                        | 3UTR         |
| hsa-miR-11400 | NM_032428    | FRMPD3     | 7033  | 7056 | 1            | 1    | 0.00           | 0.00            | 23                        | 13                                       | 3UTR         |
| hsa-miR-11400 | XM_017029901 | FRMPD3     | 7254  | 7277 | 1            | 1    | 0.00           | 0.00            | 23                        | 13                                       | 3UTR         |

| mirnaid       | refseqid     | genesymbol | start | end   | binding<br>p | seed | phylopste<br>m | phylopflan<br>k | binding_region_lengt<br>h | longest_<br>consecut<br>ive_pairi<br>ngs | positio<br>n |
|---------------|--------------|------------|-------|-------|--------------|------|----------------|-----------------|---------------------------|------------------------------------------|--------------|
| hsa-miR-11400 | NM_001361041 | FRRS1      | 4306  | 4332  | 1            | 1    | 0.91           | 0.20            | 26                        | 8                                        | 3UTR         |
| hsa-miR-11400 | NM_014334    | FRRS1L     | 1836  | 1861  | 1            | 1    | -0.37          | -0.01           | 25                        | 8                                        | 3UTR         |
| hsa-miR-11400 | NM_014334    | FRRS1L     | 4883  | 4901  | 1            | 1    | 0.65           | 0.21            | 18                        | 17                                       | 3UTR         |
| hsa-miR-11400 | NM_006653    | FRS3       | 1884  | 1899  | 1            | 1    | 3.49           | 4.68            | 15                        | 14                                       | 3UTR         |
| hsa-miR-11400 | NM_015082    | FSTL4      | 5167  | 5193  | 1            | 1    | 0.51           | 0.76            | 26                        | 10                                       | 3UTR         |
| hsa-miR-11400 | NM_001080432 | FTO        | 11126 | 11144 | 0.961538     | 1    | -0.36          | -0.31           | 18                        | 10                                       | 3UTR         |
| hsa-miR-11400 | XM_017023655 | FTO        | 1519  | 1536  | 0.969231     | 1    | 0.00           | 0.00            | 17                        | 13                                       | 3UTR         |
| hsa-miR-11400 | NM_023934    | FUNDC2     | 5096  | 5134  | 1            | 1    | 0.09           | 0.05            | 38                        | 11                                       | 3UTR         |
| hsa-miR-11400 | NM_000149    | FUT3       | 2142  | 2166  | 1            | 1    | 0.16           | -0.22           | 24                        | 6                                        | 3UTR         |
| hsa-miR-11400 | NM_001097640 | FUT3       | 1740  | 1764  | 1            | 1    | 1.57           | -0.54           | 24                        | 6                                        | 3UTR         |
| hsa-miR-11400 | NM_001097641 | FUT3       | 1601  | 1625  | 1            | 1    | -0.20          | -0.26           | 24                        | 6                                        | 3UTR         |
| hsa-miR-11400 | NM_025129    | FUZ        | 1463  | 1523  | 1            | 1    | 2.90           | 1.90            | 19                        | 10                                       | 3UTR         |
| hsa-miR-11400 | NM_001363663 | FUZ        | 1326  | 1386  | 1            | 1    | 1.82           | 2.61            | 19                        | 10                                       | 3UTR         |
| hsa-miR-11400 | NM_001171937 | FUZ        | 1355  | 1415  | 1            | 1    | 2.90           | 1.90            | 19                        | 10                                       | 3UTR         |
| hsa-miR-11400 | NM_181425    | FXN        | 2892  | 2922  | 1            | 1    | -0.24          | -0.36           | 30                        | 12                                       | 3UTR         |
| hsa-miR-11400 | NM_000144    | FXN        | 2884  | 2914  | 1            | 1    | -0.24          | -0.36           | 30                        | 12                                       | 3UTR         |
| hsa-miR-11400 | XM_005247816 | FXR1       | 2160  | 2178  | 1            | 1    | 0.00           | 0.00            | 18                        | 9                                        | 3UTR         |

| mirnaid       | refseqid     | genesymbol | start | end  | binding<br>p | seed | phylopste<br>m | phylopflan<br>k | binding_region_lengt<br>h | longest_<br>consecut<br>ive_pairi<br>ngs | positio<br>n |
|---------------|--------------|------------|-------|------|--------------|------|----------------|-----------------|---------------------------|------------------------------------------|--------------|
| hsa-miR-11400 | NM_001011537 | FYTDD1     | 6711  | 6735 | 1            | 1    | 0.00           | 0.00            | 24                        | 7                                        | 3UTR         |
| hsa-miR-11400 | NM_145866    | FZD3       | 3086  | 3122 | 1            | 1    | 0.97           | 0.70            | 36                        | 12                                       | 3UTR         |
| hsa-miR-11400 | NM_017412    | FZD3       | 3132  | 3168 | 1            | 1    | 0.85           | 0.70            | 36                        | 12                                       | 3UTR         |
| hsa-miR-11400 | NM_001270397 | G6PC       | 1432  | 1453 | 1            | 1    | 0.48           | -0.10           | 21                        | 12                                       | 3UTR         |
| hsa-miR-11400 | NM_000151    | G6PC       | 1509  | 1530 | 1            | 1    | 0.48           | -0.10           | 21                        | 12                                       | 3UTR         |
| hsa-miR-11400 | NM_080491    | GAB2       | 3251  | 3273 | 1            | 1    | -0.26          | -0.06           | 22                        | 16                                       | 3UTR         |
| hsa-miR-11400 | NM_012296    | GAB2       | 3236  | 3258 | 1            | 1    | 0.17           | -0.17           | 22                        | 16                                       | 3UTR         |
| hsa-miR-11400 | XM_011514455 | GABBR1     | 2382  | 2408 | 1            | 1    | 0.00           | 0.00            | 26                        | 8                                        | 3UTR         |
| hsa-miR-11400 | NM_000811    | GABRA6     | 2243  | 2261 | 0.969231     | 1    | 1.18           | 0.44            | 18                        | 11                                       | 3UTR         |
| hsa-miR-11400 | NM_001371727 | GABRB2     | 5871  | 5890 | 1            | 1    | 3.37           | 3.64            | 19                        | 8                                        | 3UTR         |
| hsa-miR-11400 | NM_001191320 | GABRB3     | 3682  | 3696 | 1            | 1    | 0.75           | 0.63            | 14                        | 13                                       | 3UTR         |
| hsa-miR-11400 | NM_173536    | GABRG1     | 5456  | 5483 | 1            | 1    | 2.95           | 1.82            | 18                        | 16                                       | 3UTR         |
| hsa-miR-11400 | NM_033223    | GABRG3     | 4796  | 4816 | 1            | 1    | -0.71          | -0.49           | 20                        | 13                                       | 3UTR         |
| hsa-miR-11400 | NM_018558    | GABRQ      | 2408  | 2427 | 1            | 1    | 0.40           | 0.39            | 15                        | 13                                       | 3UTR         |
| hsa-miR-11400 | NM_207359    | GADL1      | 1677  | 1694 | 1            | 1    | -0.30          | -0.08           | 17                        | 13                                       | 3UTR         |
| hsa-miR-11400 | XM_011536618 | GALC       | 3283  | 3302 | 1            | 1    | 0.00           | 0.00            | 19                        | 10                                       | 3UTR         |
| hsa-miR-11400 | NM_138801    | GALM       | 1993  | 2011 | 1            | 1    | 0.60           | -0.10           | 18                        | 8                                        | 3UTR         |

| mirnaid       | refseqid     | genesymbol | start | end  | binding<br>p | seed | phylopste<br>m | phylopflan<br>k | binding_region_lengt<br>h | longest_<br>consecut<br>ive_pairi<br>ngs | positio<br>n |
|---------------|--------------|------------|-------|------|--------------|------|----------------|-----------------|---------------------------|------------------------------------------|--------------|
| hsa-miR-11400 | NM_198321    | GALNT10    | 4807  | 4828 | 1            | 1    | -0.01          | 0.06            | 21                        | 12                                       | 3UTR         |
| hsa-miR-11400 | NM_054110    | GALNT15    | 3791  | 3818 | 1            | 1    | -0.09          | -0.13           | 27                        | 13                                       | 3UTR         |
| hsa-miR-11400 | NM_001319052 | GALNT15    | 2059  | 2086 | 1            | 1    | -0.83          | -0.21           | 27                        | 13                                       | 3UTR         |
| hsa-miR-11400 | XM_011537007 | GALNT16    | 2059  | 2078 | 1            | 1    | 0.00           | 0.00            | 19                        | 8                                        | 3UTR         |
| hsa-miR-11400 | XM_011537007 | GALNT16    | 2035  | 2056 | 1            | 1    | 0.00           | 0.00            | 21                        | 8                                        | 3UTR         |
| hsa-miR-11400 | NM_020692    | GALNT16    | 3872  | 3889 | 1            | 1    | 0.10           | -0.41           | 17                        | 14                                       | 3UTR         |
| hsa-miR-11400 | NM_138924    | GAMT       | 1337  | 1388 | 0.974359     | 1    | 3.79           | 3.71            | 26                        | 8                                        | 3UTR         |
| hsa-miR-11400 | NM_001304428 | GAPT       | 1228  | 1249 | 1            | 1    | -0.22          | 0.06            | 21                        | 10                                       | 3UTR         |
| hsa-miR-11400 | NM_014686    | GARRE1     | 4775  | 4814 | 1            | 1    | 0.16           | 0.09            | 21                        | 13                                       | 3UTR         |
| hsa-miR-11400 | NM_014686    | GARRE1     | 5712  | 5737 | 1            | 1    | -0.19          | 0.13            | 25                        | 8                                        | 3UTR         |
| hsa-miR-11400 | NM_016613    | GASK1B     | 2304  | 2323 | 1            | 1    | -0.14          | 0.09            | 19                        | 7                                        | 3UTR         |
| hsa-miR-11400 | XM_024452363 | GATA1      | 1127  | 1144 | 1            | 1    | 0.00           | 0.00            | 17                        | 16                                       | 3UTR         |
| hsa-miR-11400 | NM_002049    | GATA1      | 1318  | 1335 | 1            | 1    | 0.24           | 0.60            | 17                        | 16                                       | 3UTR         |
| hsa-miR-11400 | NM_032638    | GATA2      | 3147  | 3169 | 1            | 1    | 0.01           | 0.22            | 20                        | 7                                        | 3UTR         |
| hsa-miR-11400 | NM_001145661 | GATA2      | 3234  | 3256 | 1            | 1    | 2.42           | 1.28            | 20                        | 7                                        | 3UTR         |
| hsa-miR-11400 | NM_001145662 | GATA2      | 3013  | 3035 | 1            | 1    | 0.58           | 1.52            | 20                        | 7                                        | 3UTR         |
| hsa-miR-11400 | NM_080473    | GATA5      | 2223  | 2245 | 1            | 1    | 1.82           | 0.69            | 22                        | 8                                        | 3UTR         |

| mirnaid       | refseqid         | genesymbol | start | end  | binding<br>p | seed | phylopste<br>m | phylopflan<br>k | binding_region_lengt<br>h | longest_<br>consecut<br>ive_pairi<br>ngs | positio<br>n |
|---------------|------------------|------------|-------|------|--------------|------|----------------|-----------------|---------------------------|------------------------------------------|--------------|
| hsa-miR-11400 | NM_020699        | GATAD2B    | 3944  | 3959 | 1            | 1    | 0.45           | 0.23            | 15                        | 14                                       | 3UTR         |
| hsa-miR-11400 | NM_020699        | GATAD2B    | 6901  | 6916 | 1            | 1    | 2.93           | 4.03            | 15                        | 14                                       | 3UTR         |
| hsa-miR-11400 | NM_176818        | GATC       | 3779  | 3798 | 1            | 1    | -0.50          | -0.14           | 19                        | 10                                       | 3UTR         |
| hsa-miR-11400 | NM_176818        | GATC       | 4092  | 4110 | 1            | 1    | 0.37           | 0.10            | 18                        | 8                                        | 3UTR         |
| hsa-miR-11400 | NM_00100574<br>1 | GBA        | 1876  | 1895 | 0.961538     | 1    | 3.70           | 1.78            | 19                        | 12                                       | 3UTR         |
| hsa-miR-11400 | NM_00117181<br>2 | GBA        | 1676  | 1695 | 0.961538     | 1    | 3.59           | 2.82            | 19                        | 12                                       | 3UTR         |
| hsa-miR-11400 | NM_000157        | GBA        | 2061  | 2080 | 1            | 1    | -0.07          | 0.50            | 19                        | 11                                       | 3UTR         |
| hsa-miR-11400 | NM_000157        | GBA        | 1823  | 1842 | 1            | 1    | 1.99           | 2.54            | 19                        | 12                                       | 3UTR         |
| hsa-miR-11400 | NM_00117181<br>2 | GBA        | 1914  | 1933 | 1            | 1    | -0.06          | 0.48            | 19                        | 11                                       | 3UTR         |
| hsa-miR-11400 | NM_00128262<br>9 | GBGT1      | 1476  | 1494 | 1            | 1    | 2.36           | 1.66            | 18                        | 9                                        | 3UTR         |
| hsa-miR-11400 | NM_00128263<br>2 | GBGT1      | 1444  | 1462 | 1            | 1    | 1.53           | 2.38            | 18                        | 9                                        | 3UTR         |
| hsa-miR-11400 | NM_021996        | GBGT1      | 1495  | 1513 | 1            | 1    | 2.36           | 1.66            | 18                        | 9                                        | 3UTR         |
| hsa-miR-11400 | NM_018284        | GBP3       | 2630  | 2657 | 1            | 1    | 1.54           | 3.16            | 27                        | 8                                        | 3UTR         |
| hsa-miR-11400 | NM_052941        | GBP4       | 5169  | 5186 | 1            | 1    | 1.75           | 0.40            | 17                        | 14                                       | 3UTR         |
| hsa-miR-11400 | NM_00136292<br>9 | GDAP1      | 2209  | 2231 | 1            | 1    | -0.14          | -0.01           | 22                        | 12                                       | 3UTR         |
| hsa-miR-11400 | NM_00136293<br>0 | GDAP1      | 2180  | 2202 | 1            | 1    | -0.14          | -0.01           | 22                        | 12                                       | 3UTR         |
| hsa-miR-11400 | NM_00136293<br>2 | GDAP1      | 2161  | 2183 | 1            | 1    | -0.14          | -0.01           | 22                        | 12                                       | 3UTR         |

| mirnaid       | refseqid     | genesymbol | start | end  | binding<br>p | seed | phylopste<br>m | phylopflan<br>k | binding_region_lengt<br>h | longest_<br>consecut<br>ive_pairi<br>ngs | positio<br>n |
|---------------|--------------|------------|-------|------|--------------|------|----------------|-----------------|---------------------------|------------------------------------------|--------------|
| hsa-miR-11400 | NM_001040875 | GDAP1      | 2224  | 2246 | 1            | 1    | -0.14          | -0.01           | 22                        | 12                                       | 3UTR         |
| hsa-miR-11400 | NM_017686    | GDAP2      | 6731  | 6752 | 1            | 1    | 0.23           | 0.94            | 21                        | 7                                        | 3UTR         |
| hsa-miR-11400 | NM_016641    | GDE1       | 2052  | 2071 | 1            | 1    | 4.08           | 3.54            | 19                        | 10                                       | 3UTR         |
| hsa-miR-11400 | NM_004962    | GDF10      | 2483  | 2504 | 1            | 1    | 0.51           | 0.99            | 21                        | 10                                       | 3UTR         |
| hsa-miR-11400 | NM_016204    | GDF2       | 1807  | 1829 | 1            | 1    | -0.19          | -0.06           | 22                        | 6                                        | 3UTR         |
| hsa-miR-11400 | NM_001494    | GDI2       | 2051  | 2079 | 1            | 1    | 6.73           | 4.22            | 28                        | 10                                       | 3UTR         |
| hsa-miR-11400 | NM_001115156 | GDI2       | 1916  | 1944 | 1            | 1    | 6.73           | 4.22            | 28                        | 10                                       | 3UTR         |
| hsa-miR-11400 | NM_000514    | GDNF       | 1446  | 1462 | 1            | 1    | 0.70           | -0.03           | 16                        | 15                                       | 3UTR         |
| hsa-miR-11400 | NM_001190468 | GDNF       | 1105  | 1121 | 1            | 1    | 0.07           | -0.09           | 16                        | 15                                       | 3UTR         |
| hsa-miR-11400 | NM_017856    | GEMIN8     | 1054  | 1073 | 0.980769     | 1    | -0.14          | -0.04           | 19                        | 12                                       | 3UTR         |
| hsa-miR-11400 | NM_001042480 | GEMIN8     | 884   | 903  | 0.980769     | 1    | -0.13          | -0.03           | 19                        | 12                                       | 3UTR         |
| hsa-miR-11400 | NM_001242628 | GFOD1      | 6525  | 6550 | 1            | 1    | 0.00           | 0.00            | 17                        | 15                                       | 3UTR         |
| hsa-miR-11400 | NM_001242630 | GFOD1      | 6619  | 6644 | 1            | 1    | 0.00           | 0.00            | 17                        | 15                                       | 3UTR         |
| hsa-miR-11400 | NM_001242630 | GFOD1      | 1194  | 1215 | 1            | 1    | -0.32          | 0.74            | 21                        | 8                                        | 3UTR         |
| hsa-miR-11400 | NM_001145453 | GFRA1      | 6859  | 6907 | 1            | 1    | 1.11           | 0.73            | 18                        | 7                                        | 3UTR         |
| hsa-miR-11400 | XM_006716327 | GFRA2      | 2331  | 2373 | 1            | 1    | 0.00           | 0.00            | 21                        | 9                                        | 3UTR         |
| hsa-miR-11400 | XM_006716327 | GFRA2      | 1551  | 1571 | 1            | 1    | 0.00           | 0.00            | 20                        | 7                                        | 3UTR         |

| mirnaid       | refseqid     | genesymbol | start | end  | binding<br>p | seed | phylopste<br>m | phylopflan<br>k | binding_region_lengt<br>h | longest_<br>consecut<br>ive_pairi<br>ngs | positio<br>n |
|---------------|--------------|------------|-------|------|--------------|------|----------------|-----------------|---------------------------|------------------------------------------|--------------|
| hsa-miR-11400 | NM_001495    | GFRA2      | 2146  | 2166 | 1            | 1    | 0.48           | -0.12           | 20                        | 7                                        | 3UTR         |
| hsa-miR-11400 | NM_001165038 | GFRA2      | 2633  | 2653 | 1            | 1    | 0.16           | 0.39            | 20                        | 9                                        | 3UTR         |
| hsa-miR-11400 | NM_001165038 | GFRA2      | 1831  | 1851 | 1            | 1    | 4.15           | 1.87            | 20                        | 7                                        | 3UTR         |
| hsa-miR-11400 | NM_001165039 | GFRA2      | 2549  | 2569 | 1            | 1    | 0.14           | 0.06            | 20                        | 9                                        | 3UTR         |
| hsa-miR-11400 | NM_138619    | GGA3       | 2610  | 2626 | 1            | 1    | 1.15           | 2.15            | 16                        | 15                                       | 3UTR         |
| hsa-miR-11400 | NM_014001    | GGA3       | 2511  | 2527 | 1            | 1    | 0.46           | 1.03            | 16                        | 15                                       | 3UTR         |
| hsa-miR-11400 | NM_001172703 | GGA3       | 2633  | 2649 | 1            | 1    | 1.23           | 2.90            | 16                        | 15                                       | 3UTR         |
| hsa-miR-11400 | NM_015575    | GIGYF2     | 5332  | 5357 | 1            | 1    | 0.27           | 0.32            | 25                        | 7                                        | 3UTR         |
| hsa-miR-11400 | NM_001103146 | GIGYF2     | 5192  | 5217 | 1            | 1    | 0.27           | 0.32            | 25                        | 7                                        | 3UTR         |
| hsa-miR-11400 | NM_001103147 | GIGYF2     | 5325  | 5350 | 1            | 1    | 0.27           | 0.32            | 25                        | 7                                        | 3UTR         |
| hsa-miR-11400 | NM_001103148 | GIGYF2     | 5108  | 5133 | 1            | 1    | 0.27           | 0.32            | 25                        | 7                                        | 3UTR         |
| hsa-miR-11400 | NM_030772    | GJA9       | 2074  | 2122 | 1            | 1    | 0.14           | 0.53            | 15                        | 7                                        | 3UTR         |
| hsa-miR-11400 | NM_004004    | GJB2       | 1220  | 1238 | 1            | 1    | 0.53           | -0.25           | 18                        | 14                                       | 3UTR         |
| hsa-miR-11400 | XM_011537775 | GLIPR1     | 3449  | 3470 | 1            | 1    | 0.00           | 0.00            | 21                        | 7                                        | 3UTR         |
| hsa-miR-11400 | NM_006851    | GLIPR1     | 3377  | 3398 | 1            | 1    | -0.04          | -0.02           | 21                        | 7                                        | 3UTR         |
| hsa-miR-11400 | NM_152629    | GLIS3      | 6084  | 6104 | 1            | 1    | 2.35           | 2.89            | 20                        | 7                                        | 3UTR         |
| hsa-miR-11400 | NM_001256605 | GLMP       | 1192  | 1213 | 1            | 1    | 2.83           | 0.42            | 19                        | 10                                       | 3UTR         |

| mirnaid       | refseqid     | genesymbol | start | end  | binding<br>p | seed | phylopste<br>m | phylopflan<br>k | binding_region_lengt<br>h | longest_<br>consecut<br>ive_pairi<br>ngs | positio<br>n |
|---------------|--------------|------------|-------|------|--------------|------|----------------|-----------------|---------------------------|------------------------------------------|--------------|
| hsa-miR-11400 | NM_001256608 | GLMP       | 1193  | 1214 | 1            | 1    | 2.89           | 1.13            | 19                        | 10                                       | 3UTR         |
| hsa-miR-11400 | NM_144580    | GLMP       | 1450  | 1471 | 1            | 1    | 2.92           | 1.07            | 19                        | 10                                       | 3UTR         |
| hsa-miR-11400 | XM_005256861 | GLP2R      | 1664  | 1681 | 1            | 1    | 0.00           | 0.00            | 17                        | 8                                        | 3UTR         |
| hsa-miR-11400 | NM_004246    | GLP2R      | 2115  | 2132 | 1            | 1    | 0.53           | -0.12           | 17                        | 8                                        | 3UTR         |
| hsa-miR-11400 | NM_001033044 | GLUL       | 6338  | 6356 | 1            | 1    | 3.35           | 3.39            | 18                        | 14                                       | 3UTR         |
| hsa-miR-11400 | NM_145262    | GLYCTK     | 3105  | 3123 | 1            | 1    | 0.05           | -0.14           | 18                        | 11                                       | 3UTR         |
| hsa-miR-11400 | NM_001144951 | GLYCTK     | 2929  | 2947 | 1            | 1    | 0.00           | 0.00            | 18                        | 11                                       | 3UTR         |
| hsa-miR-11400 | NM_024482    | GMEB1      | 3912  | 3929 | 1            | 1    | 0.77           | 1.06            | 17                        | 13                                       | 3UTR         |
| hsa-miR-11400 | NM_006582    | GMEB1      | 3945  | 3962 | 1            | 1    | 0.77           | 1.06            | 17                        | 13                                       | 3UTR         |
| hsa-miR-11400 | NM_001319674 | GMEB1      | 3915  | 3932 | 1            | 1    | 0.77           | 1.06            | 17                        | 13                                       | 3UTR         |
| hsa-miR-11400 | NM_001282440 | GNA12      | 2970  | 2990 | 1            | 1    | 0.31           | 0.56            | 20                        | 11                                       | 3UTR         |
| hsa-miR-11400 | NM_001282441 | GNA12      | 3069  | 3089 | 1            | 1    | 3.34           | 2.55            | 20                        | 11                                       | 3UTR         |
| hsa-miR-11400 | NM_001282441 | GNA12      | 1740  | 1762 | 1            | 1    | 0.60           | 0.00            | 22                        | 9                                        | 3UTR         |
| hsa-miR-11400 | NM_001261443 | GNAL       | 1598  | 1621 | 1            | 1    | -0.04          | 0.29            | 23                        | 10                                       | 3UTR         |
| hsa-miR-11400 | NM_001261444 | GNAL       | 1001  | 1024 | 1            | 1    | -0.04          | 0.29            | 23                        | 10                                       | 3UTR         |
| hsa-miR-11400 | NM_182978    | GNAL       | 1990  | 2013 | 1            | 1    | -0.04          | 0.29            | 23                        | 10                                       | 3UTR         |
| hsa-miR-11400 | NM_001369387 | GNAL       | 1808  | 1831 | 1            | 1    | -0.04          | 0.29            | 23                        | 10                                       | 3UTR         |



| mirnaid       | refseqid     | genesymbol | start | end  | binding<br>p | seed | phylopste<br>m | phylopflan<br>k | binding_region_lengt<br>h | longest_<br>consecut<br>ive_pairi<br>ngs | positio<br>n |
|---------------|--------------|------------|-------|------|--------------|------|----------------|-----------------|---------------------------|------------------------------------------|--------------|
| hsa-miR-11400 | NM_001142339 | GNAL       | 1675  | 1698 | 1            | 1    | -0.04          | 0.29            | 23                        | 10                                       | 3UTR         |
| hsa-miR-11400 | XM_017014167 | GNE        | 3173  | 3198 | 1            | 1    | 0.00           | 0.00            | 25                        | 8                                        | 3UTR         |
| hsa-miR-11400 | NM_005476    | GNE        | 3277  | 3302 | 1            | 1    | 4.06           | 4.15            | 25                        | 8                                        | 3UTR         |
| hsa-miR-11400 | NM_001190388 | GNE        | 3028  | 3053 | 1            | 1    | 3.71           | 3.74            | 25                        | 8                                        | 3UTR         |
| hsa-miR-11400 | NM_004126    | GNG11      | 2223  | 2244 | 1            | 1    | 0.26           | 0.30            | 21                        | 8                                        | 3UTR         |
| hsa-miR-11400 | XM_011544167 | GNG4       | 2250  | 2268 | 1            | 1    | 0.00           | 0.00            | 18                        | 8                                        | 3UTR         |
| hsa-miR-11400 | NM_004485    | GNG4       | 2291  | 2309 | 1            | 1    | 0.00           | 0.00            | 18                        | 8                                        | 3UTR         |
| hsa-miR-11400 | NM_001098721 | GNG4       | 2403  | 2421 | 1            | 1    | 0.00           | 0.00            | 18                        | 8                                        | 3UTR         |
| hsa-miR-11400 | NM_021955    | GNGT1      | 502   | 529  | 1            | 1    | 0.24           | 0.19            | 27                        | 9                                        | 3UTR         |
| hsa-miR-11400 | NM_005275    | GNL1       | 7234  | 7254 | 1            | 1    | 1.23           | 0.58            | 20                        | 12                                       | 3UTR         |
| hsa-miR-11400 | NM_138335    | GNPDA2     | 1174  | 1193 | 1            | 1    | 1.06           | 1.94            | 19                        | 8                                        | 3UTR         |
| hsa-miR-11400 | NM_024312    | GNPTAB     | 5444  | 5470 | 1            | 1    | 0.86           | 2.16            | 26                        | 8                                        | 3UTR         |
| hsa-miR-11400 | NM_000406    | GNRHR      | 1487  | 1505 | 1            | 1    | 0.54           | 0.24            | 18                        | 8                                        | 3UTR         |
| hsa-miR-11400 | NM_000406    | GNRHR      | 3918  | 3934 | 1            | 1    | 2.68           | 2.93            | 16                        | 15                                       | 3UTR         |
| hsa-miR-11400 | NM_001012763 | GNRHR      | 1359  | 1377 | 1            | 1    | 0.09           | 0.05            | 18                        | 8                                        | 3UTR         |
| hsa-miR-11400 | NM_001012763 | GNRHR      | 3790  | 3806 | 1            | 1    | 3.03           | 1.91            | 16                        | 15                                       | 3UTR         |
| hsa-miR-11400 | NM_004486    | GOLGA2     | 3893  | 3912 | 1            | 1    | 1.78           | 2.48            | 19                        | 9                                        | 3UTR         |

| mirnaid       | refseqid     | genesymbol | start | end  | binding<br>p | seed | phylopste<br>m | phylopflan<br>k | binding_region_lengt<br>h | longest_<br>consecut<br>ive_pairi<br>ngs | positio<br>n |
|---------------|--------------|------------|-------|------|--------------|------|----------------|-----------------|---------------------------|------------------------------------------|--------------|
| hsa-miR-11400 | XM_006719736 | GOLGA3     | 6005  | 6024 | 1            | 1    | 0.00           | 0.00            | 19                        | 10                                       | 3UTR         |
| hsa-miR-11400 | NM_005895    | GOLGA3     | 5965  | 5984 | 1            | 1    | 2.18           | 2.34            | 19                        | 10                                       | 3UTR         |
| hsa-miR-11400 | NM_004871    | GOSR1      | 5544  | 5580 | 1            | 1    | -0.05          | 0.15            | 36                        | 10                                       | 3UTR         |
| hsa-miR-11400 | NM_001007024 | GOSR1      | 5560  | 5596 | 1            | 1    | -0.05          | 0.15            | 36                        | 10                                       | 3UTR         |
| hsa-miR-11400 | NM_001007025 | GOSR1      | 5538  | 5574 | 1            | 1    | -0.05          | 0.15            | 36                        | 10                                       | 3UTR         |
| hsa-miR-11400 | XM_006722190 | GOSR2      | 1204  | 1224 | 1            | 1    | 0.00           | 0.00            | 20                        | 10                                       | 3UTR         |
| hsa-miR-11400 | XM_017025389 | GOSR2      | 2544  | 2585 | 1            | 1    | 0.00           | 0.00            | 17                        | 15                                       | 3UTR         |
| hsa-miR-11400 | XM_017025395 | GOSR2      | 2769  | 2785 | 1            | 1    | 0.00           | 0.00            | 16                        | 15                                       | 3UTR         |
| hsa-miR-11400 | NM_001321134 | GOSR2      | 2392  | 2433 | 1            | 1    | 0.09           | -0.05           | 17                        | 15                                       | 3UTR         |
| hsa-miR-11400 | NM_001330252 | GOSR2      | 2344  | 2385 | 1            | 1    | 0.09           | -0.05           | 17                        | 15                                       | 3UTR         |
| hsa-miR-11400 | NM_001353114 | GOSR2      | 2482  | 2523 | 1            | 1    | 0.09           | -0.05           | 17                        | 15                                       | 3UTR         |
| hsa-miR-11400 | NM_001353115 | GOSR2      | 2341  | 2382 | 1            | 1    | 0.09           | -0.05           | 17                        | 15                                       | 3UTR         |
| hsa-miR-11400 | NM_001363851 | GOSR2      | 2921  | 2937 | 1            | 1    | 0.11           | 0.08            | 16                        | 15                                       | 3UTR         |
| hsa-miR-11400 | NM_004488    | GP5        | 2143  | 2160 | 1            | 1    | -0.07          | 0.44            | 17                        | 8                                        | 3UTR         |
| hsa-miR-11400 | NM_001278505 | GPATCH11   | 768   | 807  | 1            | 1    | -0.05          | 0.38            | 19                        | 10                                       | 3UTR         |
| hsa-miR-11400 | NM_174931    | GPATCH11   | 1037  | 1076 | 1            | 1    | -0.05          | 0.38            | 19                        | 10                                       | 3UTR         |
| hsa-miR-11400 | XM_017020302 | GPC6       | 3805  | 3829 | 1            | 1    | 0.00           | 0.00            | 24                        | 7                                        | 3UTR         |

| mirnaid       | refseqid     | genesymbol | start | end  | binding<br>p | seed | phylopste<br>m | phylopflan<br>k | binding_region_lengt<br>h | longest_<br>consecut<br>ive_pairi<br>ngs | positio<br>n |
|---------------|--------------|------------|-------|------|--------------|------|----------------|-----------------|---------------------------|------------------------------------------|--------------|
| hsa-miR-11400 | NM_005708    | GPC6       | 4826  | 4850 | 1            | 1    | 0.51           | 0.45            | 24                        | 7                                        | 3UTR         |
| hsa-miR-11400 | XM_005246469 | GPD2       | 3882  | 3898 | 1            | 1    | 0.00           | 0.00            | 16                        | 7                                        | 3UTR         |
| hsa-miR-11400 | XM_011510978 | GPD2       | 3987  | 4003 | 1            | 1    | 0.00           | 0.00            | 16                        | 7                                        | 3UTR         |
| hsa-miR-11400 | NM_005278    | GPM6B      | 2656  | 2676 | 1            | 1    | 0.00           | 0.00            | 20                        | 7                                        | 3UTR         |
| hsa-miR-11400 | NM_001001994 | GPM6B      | 2526  | 2558 | 1            | 1    | 1.17           | 1.32            | 21                        | 7                                        | 3UTR         |
| hsa-miR-11400 | NM_001001996 | GPM6B      | 2776  | 2796 | 1            | 1    | 1.21           | 0.55            | 20                        | 7                                        | 3UTR         |
| hsa-miR-11400 | NM_018066    | GPN2       | 1234  | 1254 | 1            | 1    | 0.05           | 0.11            | 20                        | 8                                        | 3UTR         |
| hsa-miR-11400 | NM_001261454 | GPR1       | 1376  | 1391 | 1            | 1    | 0.00           | 0.00            | 15                        | 6                                        | 3UTR         |
| hsa-miR-11400 | NM_054021    | GPR101     | 3234  | 3275 | 1            | 1    | 1.07           | 0.98            | 41                        | 13                                       | 3UTR         |
| hsa-miR-11400 | XM_024449694 | GPR135     | 4558  | 4576 | 1            | 1    | 0.00           | 0.00            | 18                        | 17                                       | 3UTR         |
| hsa-miR-11400 | NM_001303473 | GPR146     | 1684  | 1704 | 1            | 1    | -1.15          | -0.82           | 20                        | 19                                       | 3UTR         |
| hsa-miR-11400 | NM_138445    | GPR146     | 1685  | 1705 | 1            | 1    | -1.15          | -0.82           | 20                        | 19                                       | 3UTR         |
| hsa-miR-11400 | NM_001038705 | GPR149     | 4640  | 4665 | 1            | 1    | 1.16           | 3.67            | 25                        | 13                                       | 3UTR         |
| hsa-miR-11400 | NM_001267050 | GPR155     | 4911  | 4936 | 0.961538     | 1    | 3.82           | 2.64            | 25                        | 8                                        | 3UTR         |
| hsa-miR-11400 | XM_017005795 | GPR156     | 4058  | 4081 | 1            | 1    | 0.00           | 0.00            | 23                        | 8                                        | 3UTR         |
| hsa-miR-11400 | XM_017005795 | GPR156     | 2975  | 2992 | 1            | 1    | 0.00           | 0.00            | 17                        | 16                                       | 3UTR         |
| hsa-miR-11400 | XM_017005795 | GPR156     | 3322  | 3340 | 1            | 1    | 0.00           | 0.00            | 18                        | 12                                       | 3UTR         |

| mirnaid       | refseqid     | genesymbol | start | end   | binding<br>p | seed | phylopste<br>m | phylopflan<br>k | binding_region_lengt<br>h | longest_<br>consecut<br>ive_pairi<br>ngs | positio<br>n |
|---------------|--------------|------------|-------|-------|--------------|------|----------------|-----------------|---------------------------|------------------------------------------|--------------|
| hsa-miR-11400 | NM_001267609 | GPR161     | 4286  | 4310  | 1            | 1    | -0.06          | -0.19           | 24                        | 10                                       | 3UTR         |
| hsa-miR-11400 | NM_001267611 | GPR161     | 3836  | 3860  | 1            | 1    | -0.12          | -0.12           | 24                        | 10                                       | 3UTR         |
| hsa-miR-11400 | NM_001267612 | GPR161     | 4286  | 4310  | 1            | 1    | -0.06          | -0.19           | 24                        | 10                                       | 3UTR         |
| hsa-miR-11400 | NM_180989    | GPR180     | 4056  | 4091  | 1            | 1    | 0.21           | 0.12            | 25                        | 9                                        | 3UTR         |
| hsa-miR-11400 | NM_005293    | GPR20      | 1439  | 1455  | 1            | 1    | -0.29          | -0.53           | 16                        | 15                                       | 3UTR         |
| hsa-miR-11400 | NM_005282    | GPR4       | 2653  | 2689  | 1            | 1    | 0.00           | 0.00            | 18                        | 10                                       | 3UTR         |
| hsa-miR-11400 | NM_030784    | GPR63      | 3585  | 3625  | 1            | 1    | 0.46           | 0.01            | 20                        | 11                                       | 3UTR         |
| hsa-miR-11400 | NM_003608    | GPR65      | 4400  | 4413  | 1            | 1    | -0.16          | 0.19            | 13                        | 12                                       | 3UTR         |
| hsa-miR-11400 | NM_001146265 | GPR85      | 2763  | 2784  | 1            | 1    | 1.26           | 0.97            | 17                        | 7                                        | 3UTR         |
| hsa-miR-11400 | NM_001366261 | GPRC5C     | 3166  | 3195  | 1            | 1    | 0.21           | -0.29           | 22                        | 8                                        | 3UTR         |
| hsa-miR-11400 | NM_198281    | GPRIN3     | 13193 | 13239 | 1            | 1    | 0.31           | 0.33            | 24                        | 10                                       | 3UTR         |
| hsa-miR-11400 | NM_198281    | GPRIN3     | 4750  | 4766  | 1            | 1    | 0.83           | 1.14            | 16                        | 15                                       | 3UTR         |
| hsa-miR-11400 | XM_017008044 | GPRIN3     | 4758  | 4774  | 1            | 1    | 0.00           | 0.00            | 16                        | 15                                       | 3UTR         |
| hsa-miR-11400 | NM_201397    | GPX1       | 881   | 897   | 1            | 1    | 2.30           | 3.40            | 16                        | 15                                       | 3UTR         |
| hsa-miR-11400 | NM_001329502 | GPX1       | 743   | 759   | 1            | 1    | 2.30           | 3.31            | 16                        | 15                                       | 3UTR         |
| hsa-miR-11400 | NM_001329503 | GPX1       | 621   | 637   | 1            | 1    | 2.30           | 3.43            | 16                        | 15                                       | 3UTR         |
| hsa-miR-11400 | NM_015696    | GPX7       | 802   | 841   | 1            | 1    | 0.44           | 0.36            | 23                        | 6                                        | 3UTR         |

| mirnaid       | refseqid     | genesymbol | start | end  | binding<br>p | seed | phylopste<br>m | phylopflan<br>k | binding_region_lengt<br>h | longest_<br>consecut<br>ive_pairi<br>ngs | positio<br>n |
|---------------|--------------|------------|-------|------|--------------|------|----------------|-----------------|---------------------------|------------------------------------------|--------------|
| hsa-miR-11400 | XM_011542933 | GRAMD1B    | 7791  | 7810 | 0.974359     | 1    | 0.00           | 0.00            | 19                        | 7                                        | 3UTR         |
| hsa-miR-11400 | XM_017018050 | GRAMD1B    | 7396  | 7415 | 0.974359     | 1    | 0.00           | 0.00            | 19                        | 7                                        | 3UTR         |
| hsa-miR-11400 | NM_001286563 | GRAMD1B    | 7680  | 7699 | 1            | 1    | 0.69           | 0.60            | 19                        | 7                                        | 3UTR         |
| hsa-miR-11400 | NM_001286564 | GRAMD1B    | 7379  | 7398 | 1            | 1    | 0.69           | 0.60            | 19                        | 7                                        | 3UTR         |
| hsa-miR-11400 | NM_020716    | GRAMD1B    | 7659  | 7678 | 1            | 1    | 0.69           | 0.60            | 19                        | 7                                        | 3UTR         |
| hsa-miR-11400 | NM_001367421 | GRAMD1B    | 7883  | 7902 | 1            | 1    | 0.69           | 0.60            | 19                        | 7                                        | 3UTR         |
| hsa-miR-11400 | NM_001146319 | GRAMD2B    | 1648  | 1665 | 1            | 1    | 1.79           | 0.54            | 17                        | 13                                       | 3UTR         |
| hsa-miR-11400 | NM_001291825 | GRAP2      | 2426  | 2440 | 1            | 1    | 0.00           | 0.00            | 14                        | 13                                       | 3UTR         |
| hsa-miR-11400 | NM_004810    | GRAP2      | 2397  | 2411 | 1            | 1    | -0.74          | -0.28           | 14                        | 13                                       | 3UTR         |
| hsa-miR-11400 | NM_001001550 | GRB10      | 1996  | 2034 | 1            | 1    | -0.56          | 0.08            | 38                        | 11                                       | 3UTR         |
| hsa-miR-11400 | NM_013372    | GREM1      | 900   | 922  | 1            | 1    | 0.00           | 0.00            | 22                        | 8                                        | 3UTR         |
| hsa-miR-11400 | NM_001368719 | GREM1      | 961   | 983  | 1            | 1    | 1.09           | 0.46            | 22                        | 8                                        | 3UTR         |
| hsa-miR-11400 | NM_001191323 | GREM1      | 777   | 799  | 1            | 1    | 1.09           | 0.46            | 22                        | 8                                        | 3UTR         |
| hsa-miR-11400 | NM_001258019 | GRIA1      | 3631  | 3645 | 1            | 1    | 0.80           | 0.38            | 14                        | 13                                       | 3UTR         |
| hsa-miR-11400 | NM_001258021 | GRIA1      | 3709  | 3723 | 1            | 1    | 0.15           | 0.33            | 14                        | 13                                       | 3UTR         |
| hsa-miR-11400 | NM_001258022 | GRIA1      | 3709  | 3723 | 1            | 1    | 0.15           | 0.33            | 14                        | 13                                       | 3UTR         |
| hsa-miR-11400 | NM_001258023 | GRIA1      | 3606  | 3620 | 1            | 1    | 0.15           | 0.33            | 14                        | 13                                       | 3UTR         |

| mirnaid       | refseqid     | genesymbol | start | end  | binding<br>p | seed | phylopste<br>m | phylopflan<br>k | binding_region_lengt<br>h | longest_<br>consecut<br>ive_pairi<br>ngs | positio<br>n |
|---------------|--------------|------------|-------|------|--------------|------|----------------|-----------------|---------------------------|------------------------------------------|--------------|
| hsa-miR-11400 | NM_000827    | GRIA1      | 3871  | 3885 | 1            | 1    | 0.15           | 0.33            | 14                        | 13                                       | 3UTR         |
| hsa-miR-11400 | NM_001114183 | GRIA1      | 3871  | 3885 | 1            | 1    | 0.80           | 0.38            | 14                        | 13                                       | 3UTR         |
| hsa-miR-11400 | NM_001282470 | GRIK4      | 4845  | 4866 | 1            | 1    | 0.08           | 1.34            | 21                        | 7                                        | 3UTR         |
| hsa-miR-11400 | NM_133445    | GRIN3A     | 7126  | 7148 | 1            | 1    | 2.16           | 2.57            | 22                        | 8                                        | 3UTR         |
| hsa-miR-11400 | NM_005160    | GRK3       | 6843  | 6864 | 1            | 1    | -0.63          | -0.51           | 21                        | 10                                       | 3UTR         |
| hsa-miR-11400 | NM_000637    | GSR        | 2520  | 2537 | 0.961538     | 1    | 3.73           | 3.20            | 17                        | 9                                        | 3UTR         |
| hsa-miR-11400 | NM_001195102 | GSR        | 2433  | 2450 | 0.961538     | 1    | 3.57           | 3.06            | 17                        | 9                                        | 3UTR         |
| hsa-miR-11400 | NM_001195103 | GSR        | 2361  | 2378 | 0.961538     | 1    | 3.57           | 3.06            | 17                        | 9                                        | 3UTR         |
| hsa-miR-11400 | NM_001195104 | GSR        | 2274  | 2291 | 0.961538     | 1    | 3.57           | 3.06            | 17                        | 9                                        | 3UTR         |
| hsa-miR-11400 | NM_001322494 | GSS        | 1930  | 1945 | 1            | 1    | 0.06           | -0.07           | 15                        | 8                                        | 3UTR         |
| hsa-miR-11400 | NM_001322495 | GSS        | 2692  | 2707 | 1            | 1    | 0.20           | 0.03            | 15                        | 8                                        | 3UTR         |
| hsa-miR-11400 | NM_001284234 | GTDC1      | 1467  | 1486 | 1            | 1    | -0.42          | 0.17            | 19                        | 9                                        | 3UTR         |
| hsa-miR-11400 | NM_001164629 | GTDC1      | 1752  | 1771 | 1            | 1    | -0.13          | 2.09            | 19                        | 9                                        | 3UTR         |
| hsa-miR-11400 | NM_001376000 | GTF2H2C    | 2168  | 2193 | 1            | 1    | -0.14          | 0.08            | 25                        | 8                                        | 3UTR         |
| hsa-miR-11400 | NM_033107    | GTPBP10    | 2607  | 2626 | 1            | 1    | 0.00           | 0.07            | 19                        | 10                                       | 3UTR         |
| hsa-miR-11400 | NM_001042717 | GTPBP10    | 2370  | 2389 | 1            | 1    | 0.00           | 0.07            | 19                        | 10                                       | 3UTR         |
| hsa-miR-11400 | NM_001284256 | GUCD1      | 755   | 792  | 0.974359     | 1    | 0.27           | -0.16           | 23                        | 9                                        | 3UTR         |

| mirnaid       | refseqid     | genesymbol | start | end  | binding<br>p | seed | phylopste<br>m | phylopflan<br>k | binding_region_lengt<br>h | longest_<br>consecut<br>ive_pairi<br>ngs | positio<br>n |
|---------------|--------------|------------|-------|------|--------------|------|----------------|-----------------|---------------------------|------------------------------------------|--------------|
| hsa-miR-11400 | NM_001284251 | GUCD1      | 1087  | 1124 | 1            | 1    | -0.34          | -0.18           | 23                        | 9                                        | 3UTR         |
| hsa-miR-11400 | NM_001284254 | GUCD1      | 994   | 1031 | 1            | 1    | -0.57          | -0.19           | 23                        | 9                                        | 3UTR         |
| hsa-miR-11400 | NM_001284257 | GUCD1      | 752   | 789  | 1            | 1    | 0.15           | -0.20           | 23                        | 9                                        | 3UTR         |
| hsa-miR-11400 | NM_031444    | GUCD1      | 997   | 1034 | 1            | 1    | -0.61          | -0.17           | 23                        | 9                                        | 3UTR         |
| hsa-miR-11400 | NM_001256449 | GUCY1A1    | 8228  | 8247 | 1            | 1    | -0.51          | -0.07           | 19                        | 18                                       | 3UTR         |
| hsa-miR-11400 | NM_000856    | GUCY1A1    | 8138  | 8157 | 1            | 1    | -0.51          | -0.07           | 19                        | 18                                       | 3UTR         |
| hsa-miR-11400 | NM_001130682 | GUCY1A1    | 8044  | 8063 | 1            | 1    | -0.51          | -0.07           | 19                        | 18                                       | 3UTR         |
| hsa-miR-11400 | NM_001130683 | GUCY1A1    | 8299  | 8318 | 1            | 1    | -0.51          | -0.07           | 19                        | 18                                       | 3UTR         |
| hsa-miR-11400 | NM_001130684 | GUCY1A1    | 8123  | 8142 | 1            | 1    | -0.51          | -0.07           | 19                        | 18                                       | 3UTR         |
| hsa-miR-11400 | NM_001130685 | GUCY1A1    | 8120  | 8139 | 1            | 1    | -0.51          | -0.07           | 19                        | 18                                       | 3UTR         |
| hsa-miR-11400 | NM_001270781 | GZMH       | 588   | 637  | 0.961538     | 1    | -0.03          | -0.11           | 18                        | 8                                        | 3UTR         |
| hsa-miR-11400 | NM_033423    | GZMH       | 846   | 895  | 0.961538     | 1    | -0.03          | -0.11           | 18                        | 8                                        | 3UTR         |
| hsa-miR-11400 | NM_177925    | H2AJ       | 2953  | 2972 | 1            | 1    | 0.74           | 0.13            | 19                        | 9                                        | 3UTR         |
| hsa-miR-11400 | NM_198402    | HACD2      | 3058  | 3076 | 1            | 1    | 1.03           | 0.76            | 18                        | 11                                       | 3UTR         |
| hsa-miR-11400 | NM_001010915 | HACD4      | 7206  | 7222 | 1            | 1    | 0.01           | 0.46            | 16                        | 6                                        | 3UTR         |
| hsa-miR-11400 | NM_177977    | HAP1       | 2670  | 2687 | 1            | 1    | 0.14           | 0.54            | 17                        | 10                                       | 3UTR         |
| hsa-miR-11400 | NM_001079870 | HAP1       | 2622  | 2639 | 1            | 1    | 0.59           | 0.73            | 17                        | 10                                       | 3UTR         |

| mirnaid       | refseqid     | genesymbol | start | end  | binding<br>p | seed | phylopste<br>m | phylopflan<br>k | binding_region_lengt<br>h | longest_<br>consecut<br>ive_pairi<br>ngs | positio<br>n |
|---------------|--------------|------------|-------|------|--------------|------|----------------|-----------------|---------------------------|------------------------------------------|--------------|
| hsa-miR-11400 | NM_001079871 | HAP1       | 2598  | 2615 | 1            | 1    | 0.64           | 0.39            | 17                        | 10                                       | 3UTR         |
| hsa-miR-11400 | NM_005328    | HAS2       | 3835  | 3856 | 1            | 1    | 1.09           | 0.91            | 21                        | 7                                        | 3UTR         |
| hsa-miR-11400 | NM_005329    | HAS3       | 2316  | 2336 | 1            | 1    | 1.01           | 1.05            | 20                        | 8                                        | 3UTR         |
| hsa-miR-11400 | NM_001199280 | HAS3       | 2295  | 2315 | 1            | 1    | 1.01           | 1.05            | 20                        | 8                                        | 3UTR         |
| hsa-miR-11400 | NM_001303143 | HAUS3      | 4650  | 4666 | 1            | 1    | 1.87           | 1.96            | 16                        | 13                                       | 3UTR         |
| hsa-miR-11400 | NM_024511    | HAUS3      | 4379  | 4395 | 1            | 1    | 1.67           | 2.41            | 16                        | 13                                       | 3UTR         |
| hsa-miR-11400 | NM_021072    | HCN1       | 7529  | 7545 | 1            | 1    | 3.21           | 3.48            | 16                        | 15                                       | 3UTR         |
| hsa-miR-11400 | XM_005265491 | HDAC11     | 1996  | 2039 | 1            | 1    | 0.00           | 0.00            | 18                        | 10                                       | 3UTR         |
| hsa-miR-11400 | NM_024827    | HDAC11     | 1940  | 1983 | 1            | 1    | -0.30          | -0.07           | 18                        | 10                                       | 3UTR         |
| hsa-miR-11400 | NM_001330636 | HDAC11     | 1703  | 1746 | 1            | 1    | -0.30          | -0.07           | 18                        | 10                                       | 3UTR         |
| hsa-miR-11400 | NM_001136041 | HDAC11     | 1968  | 2011 | 1            | 1    | -0.30          | -0.07           | 18                        | 10                                       | 3UTR         |
| hsa-miR-11400 | NM_178425    | HDAC9      | 8667  | 8685 | 1            | 1    | 0.40           | 0.28            | 18                        | 9                                        | 3UTR         |
| hsa-miR-11400 | NM_001321877 | HDAC9      | 8810  | 8828 | 1            | 1    | 0.40           | 0.28            | 18                        | 9                                        | 3UTR         |
| hsa-miR-11400 | NM_001286451 | HDHC3      | 1368  | 1393 | 1            | 1    | 3.03           | 3.19            | 25                        | 6                                        | 3UTR         |
| hsa-miR-11400 | NM_001317851 | HEMK1      | 3566  | 3591 | 1            | 1    | 0.04           | 0.00            | 23                        | 10                                       | 3UTR         |
| hsa-miR-11400 | NM_016173    | HEMK1      | 3525  | 3550 | 1            | 1    | 0.33           | -0.06           | 23                        | 10                                       | 3UTR         |
| hsa-miR-11400 | NM_001377421 | HEMK1      | 3496  | 3521 | 1            | 1    | 0.33           | -0.06           | 23                        | 10                                       | 3UTR         |



| mirnaid       | refseqid     | genesymbol | start | end  | binding<br>p | seed | phylopste<br>m | phylopflan<br>k | binding_region_lengt<br>h | longest_<br>consecut<br>ive_pairi<br>ngs | positio<br>n |
|---------------|--------------|------------|-------|------|--------------|------|----------------|-----------------|---------------------------|------------------------------------------|--------------|
| hsa-miR-11400 | NM_152419    | HGSNAT     | 4895  | 4914 | 1            | 1    | -0.17          | -0.25           | 19                        | 13                                       | 3UTR         |
| hsa-miR-11400 | NM_017902    | HIF1AN     | 7661  | 7686 | 1            | 1    | -0.04          | 0.06            | 25                        | 8                                        | 3UTR         |
| hsa-miR-11400 | XM_005259153 | HIF3A      | 2232  | 2252 | 1            | 1    | 0.00           | 0.00            | 20                        | 10                                       | 3UTR         |
| hsa-miR-11400 | NM_005338    | HIP1       | 4693  | 4734 | 0.980769     | 1    | -0.01          | -0.04           | 19                        | 10                                       | 3UTR         |
| hsa-miR-11400 | NM_001243198 | HIP1       | 4540  | 4581 | 0.980769     | 1    | 0.00           | 0.00            | 19                        | 10                                       | 3UTR         |
| hsa-miR-11400 | NM_001197323 | HIRIP3     | 2050  | 2076 | 0.961538     | 1    | -0.38          | 0.08            | 14                        | 12                                       | 3UTR         |
| hsa-miR-11400 | NM_003609    | HIRIP3     | 2509  | 2535 | 1            | 1    | 1.54           | 1.71            | 14                        | 12                                       | 3UTR         |
| hsa-miR-11400 | NM_001352515 | HLCS       | 5225  | 5243 | 1            | 1    | -0.49          | -0.30           | 18                        | 9                                        | 3UTR         |
| hsa-miR-11400 | NM_001352516 | HLCS       | 5428  | 5446 | 1            | 1    | -0.55          | -0.16           | 18                        | 9                                        | 3UTR         |
| hsa-miR-11400 | NM_000411    | HLCS       | 5371  | 5389 | 1            | 1    | -0.11          | -0.32           | 18                        | 9                                        | 3UTR         |
| hsa-miR-11400 | NM_000411    | HLCS       | 5318  | 5356 | 1            | 1    | -0.09          | -0.28           | 24                        | 11                                       | 3UTR         |
| hsa-miR-11400 | NM_001242784 | HLCS       | 6314  | 6337 | 1            | 1    | 0.00           | 0.00            | 23                        | 11                                       | 3UTR         |
| hsa-miR-11400 | NM_001242785 | HLCS       | 5528  | 5546 | 1            | 1    | -0.39          | -0.51           | 18                        | 9                                        | 3UTR         |
| hsa-miR-11400 | NM_178582    | HM13       | 2274  | 2316 | 0.969231     | 1    | -0.44          | 0.00            | 23                        | 11                                       | 3UTR         |
| hsa-miR-11400 | NM_018200    | HMG20A     | 2021  | 2039 | 1            | 1    | 1.00           | 0.86            | 18                        | 9                                        | 3UTR         |
| hsa-miR-11400 | XM_024451326 | HMG20B     | 1748  | 1772 | 1            | 1    | 0.00           | 0.00            | 24                        | 9                                        | 3UTR         |
| hsa-miR-11400 | NM_003483    | HMGA2      | 1359  | 1377 | 1            | 1    | 4.70           | 3.73            | 18                        | 17                                       | 3UTR         |

| mirnaid       | refseqid     | genesymbol | start | end  | binding<br>p | seed | phylopste<br>m | phylopflan<br>k | binding_region_lengt<br>h | longest_<br>consecut<br>ive_pairi<br>ngs | positio<br>n |
|---------------|--------------|------------|-------|------|--------------|------|----------------|-----------------|---------------------------|------------------------------------------|--------------|
| hsa-miR-11400 | NM_001313892 | HMGB1      | 4090  | 4110 | 0.961538     | 1    | 0.90           | 2.80            | 20                        | 10                                       | 3UTR         |
| hsa-miR-11400 | NM_004966    | HNRNPF     | 2211  | 2229 | 1            | 1    | 3.66           | 2.94            | 18                        | 8                                        | 3UTR         |
| hsa-miR-11400 | NM_001098205 | HNRNPF     | 2245  | 2263 | 1            | 1    | 2.17           | 2.55            | 18                        | 8                                        | 3UTR         |
| hsa-miR-11400 | NM_001098206 | HNRNPF     | 2176  | 2194 | 1            | 1    | 1.93           | 3.91            | 18                        | 8                                        | 3UTR         |
| hsa-miR-11400 | NM_001098208 | HNRNPF     | 2294  | 2312 | 1            | 1    | 0.39           | 1.20            | 18                        | 8                                        | 3UTR         |
| hsa-miR-11400 | NM_004501    | HNRNPU     | 2995  | 3015 | 0.953846     | 1    | 3.94           | 2.41            | 20                        | 8                                        | 3UTR         |
| hsa-miR-11400 | NM_020834    | HOMEZ      | 3558  | 3604 | 1            | 1    | 3.47           | 2.89            | 19                        | 11                                       | 3UTR         |
| hsa-miR-11400 | NM_032410    | HOOK3      | 9734  | 9752 | 1            | 1    | 0.06           | 0.06            | 18                        | 8                                        | 3UTR         |
| hsa-miR-11400 | XM_011529917 | HORMAD2    | 1678  | 1694 | 1            | 1    | 0.00           | 0.00            | 16                        | 7                                        | 3UTR         |
| hsa-miR-11400 | NM_173860    | HOXC12     | 2143  | 2178 | 1            | 1    | 0.42           | 0.11            | 22                        | 8                                        | 3UTR         |
| hsa-miR-11400 | NM_173860    | HOXC12     | 1712  | 1730 | 1            | 1    | -0.48          | 0.07            | 18                        | 14                                       | 3UTR         |
| hsa-miR-11400 | NM_173860    | HOXC12     | 2558  | 2595 | 1            | 1    | 0.55           | 0.13            | 37                        | 10                                       | 3UTR         |
| hsa-miR-11400 | NM_016257    | HPCAL4     | 2708  | 2731 | 1            | 1    | 1.18           | 0.43            | 23                        | 6                                        | 3UTR         |
| hsa-miR-11400 | NM_001166498 | HPSE       | 2731  | 2756 | 1            | 1    | -0.06          | 0.06            | 25                        | 8                                        | 3UTR         |
| hsa-miR-11400 | NM_000861    | HRH1       | 4323  | 4342 | 1            | 1    | -0.28          | -0.09           | 19                        | 8                                        | 3UTR         |
| hsa-miR-11400 | NM_001098212 | HRH1       | 4229  | 4248 | 1            | 1    | -0.28          | -0.09           | 19                        | 8                                        | 3UTR         |
| hsa-miR-11400 | NM_001098213 | HRH1       | 4329  | 4348 | 1            | 1    | -0.28          | -0.09           | 19                        | 8                                        | 3UTR         |

| mirnaid       | refseqid     | genesymbol | start | end  | binding<br>p | seed | phylopste<br>m | phylopflan<br>k | binding_region_lengt<br>h | longest_<br>consecut<br>ive_pairi<br>ngs | positio<br>n |
|---------------|--------------|------------|-------|------|--------------|------|----------------|-----------------|---------------------------|------------------------------------------|--------------|
| hsa-miR-11400 | NM_001537    | HSBP1      | 3276  | 3310 | 1            | 1    | -0.75          | -0.04           | 21                        | 19                                       | 3UTR         |
| hsa-miR-11400 | NM_001318316 | HSCB       | 786   | 805  | 1            | 1    | 1.82           | 2.48            | 19                        | 8                                        | 3UTR         |
| hsa-miR-11400 | XM_017023732 | HSD3B7     | 1499  | 1517 | 1            | 1    | 0.00           | 0.00            | 18                        | 11                                       | 3UTR         |
| hsa-miR-11400 | NM_031463    | HSDL1      | 2687  | 2710 | 1            | 1    | 1.03           | 2.28            | 23                        | 8                                        | 3UTR         |
| hsa-miR-11400 | NM_001146051 | HSDL1      | 2522  | 2545 | 1            | 1    | 1.49           | 1.62            | 23                        | 8                                        | 3UTR         |
| hsa-miR-11400 | NM_032303    | HSDL2      | 2171  | 2190 | 1            | 1    | 0.04           | 0.16            | 19                        | 11                                       | 3UTR         |
| hsa-miR-11400 | NM_001195822 | HSDL2      | 1952  | 1971 | 1            | 1    | 0.73           | 0.41            | 19                        | 11                                       | 3UTR         |
| hsa-miR-11400 | XM_005272316 | HSF1       | 2100  | 2147 | 1            | 1    | 0.00           | 0.00            | 17                        | 15                                       | 3UTR         |
| hsa-miR-11400 | NM_005526    | HSF1       | 2023  | 2070 | 1            | 1    | 1.61           | 0.06            | 17                        | 15                                       | 3UTR         |
| hsa-miR-11400 | NM_032855    | HSH2D      | 2256  | 2281 | 1            | 1    | -0.20          | 0.02            | 25                        | 8                                        | 3UTR         |
| hsa-miR-11400 | NM_001382417 | HSH2D      | 1842  | 1867 | 1            | 1    | -0.20          | 0.02            | 25                        | 8                                        | 3UTR         |
| hsa-miR-11400 | NM_025015    | HSPA12A    | 3439  | 3457 | 0.969231     | 1    | 0.23           | 0.82            | 18                        | 11                                       | 3UTR         |
| hsa-miR-11400 | XM_005269673 | HSPA12A    | 6572  | 6590 | 1            | 1    | 0.00           | 0.00            | 18                        | 11                                       | 3UTR         |
| hsa-miR-11400 | XM_011539580 | HSPA12A    | 3603  | 3621 | 1            | 1    | 0.00           | 0.00            | 18                        | 11                                       | 3UTR         |
| hsa-miR-11400 | XM_017016032 | HSPA12A    | 3197  | 3215 | 1            | 1    | 0.00           | 0.00            | 18                        | 11                                       | 3UTR         |
| hsa-miR-11400 | NM_001330164 | HSPA12A    | 3547  | 3565 | 1            | 1    | 0.35           | 2.02            | 18                        | 11                                       | 3UTR         |
| hsa-miR-11400 | NM_001317382 | HSPA4L     | 2820  | 2844 | 1            | 1    | 1.46           | 1.98            | 24                        | 14                                       | 3UTR         |

| mirnaid       | refseqid     | genesymbol | start | end   | binding<br>p | seed | phylopste<br>m | phylopflan<br>k | binding_region_lengt<br>h | longest_<br>consecut<br>ive_pairi<br>ngs | positio<br>n |
|---------------|--------------|------------|-------|-------|--------------|------|----------------|-----------------|---------------------------|------------------------------------------|--------------|
| hsa-miR-11400 | NM_014278    | HSPA4L     | 2998  | 3022  | 1            | 1    | 1.46           | 1.98            | 24                        | 14                                       | 3UTR         |
| hsa-miR-11400 | NM_014365    | HSPB8      | 1024  | 1052  | 1            | 1    | 1.27           | 0.49            | 28                        | 10                                       | 3UTR         |
| hsa-miR-11400 | NM_006410    | HTATIP2    | 1085  | 1134  | 1            | 1    | -0.20          | 0.11            | 19                        | 6                                        | 3UTR         |
| hsa-miR-11400 | NM_001098522 | HTATIP2    | 1572  | 1621  | 1            | 1    | 0.60           | -0.05           | 19                        | 6                                        | 3UTR         |
| hsa-miR-11400 | NM_002111    | HTT        | 11954 | 11983 | 1            | 1    | -0.67          | -0.98           | 20                        | 16                                       | 3UTR         |
| hsa-miR-11400 | NM_153283    | HYAL1      | 1135  | 1167  | 1            | 1    | 1.68           | 2.49            | 32                        | 10                                       | 3UTR         |
| hsa-miR-11400 | NM_153285    | HYAL1      | 717   | 749   | 1            | 1    | 0.61           | 0.98            | 32                        | 10                                       | 3UTR         |
| hsa-miR-11400 | XM_011533668 | HYAL1      | 1800  | 1832  | 1            | 1    | 0.00           | 0.00            | 32                        | 10                                       | 3UTR         |
| hsa-miR-11400 | NM_016400    | HYPK       | 2317  | 2332  | 1            | 1    | 0.20           | 0.07            | 15                        | 14                                       | 3UTR         |
| hsa-miR-11400 | NM_001010867 | IBA57      | 5126  | 5147  | 1            | 1    | -0.03          | 0.05            | 21                        | 10                                       | 3UTR         |
| hsa-miR-11400 | NM_001288623 | ICA1L      | 7480  | 7504  | 1            | 1    | 2.69           | 2.99            | 24                        | 9                                        | 3UTR         |
| hsa-miR-11400 | XM_024452060 | ICOSLG     | 1833  | 1851  | 1            | 1    | 0.00           | 0.00            | 18                        | 17                                       | 3UTR         |
| hsa-miR-11400 | NM_001270930 | IFIT1      | 3160  | 3184  | 1            | 1    | 0.07           | -0.02           | 24                        | 8                                        | 3UTR         |
| hsa-miR-11400 | NM_001548    | IFIT1      | 2925  | 2949  | 1            | 1    | 0.19           | 0.07            | 24                        | 8                                        | 3UTR         |
| hsa-miR-11400 | NM_001547    | IFIT2      | 2118  | 2140  | 1            | 1    | -0.09          | -0.17           | 22                        | 12                                       | 3UTR         |
| hsa-miR-11400 | NM_012420    | IFIT5      | 2486  | 2507  | 1            | 1    | 0.41           | 0.28            | 21                        | 7                                        | 3UTR         |
| hsa-miR-11400 | NM_006435    | IFITM2     | 635   | 659   | 1            | 1    | -1.41          | -0.79           | 10                        | 9                                        | 3UTR         |

| mirnaid       | refseqid     | genesymbol | start | end  | binding<br>p | seed | phylopste<br>m | phylopflan<br>k | binding_region_lengt<br>h | longest_<br>consecut<br>ive_pairi<br>ngs | positio<br>n |
|---------------|--------------|------------|-------|------|--------------|------|----------------|-----------------|---------------------------|------------------------------------------|--------------|
| hsa-miR-11400 | NM_001384504 | IFNAR1     | 5615  | 5655 | 1            | 1    | 0.06           | -0.08           | 24                        | 9                                        | 3UTR         |
| hsa-miR-11400 | NM_000629    | IFNAR1     | 5533  | 5573 | 1            | 1    | 0.06           | -0.08           | 24                        | 9                                        | 3UTR         |
| hsa-miR-11400 | NM_025103    | IFT74      | 4849  | 4869 | 1            | 1    | 0.08           | -0.16           | 20                        | 7                                        | 3UTR         |
| hsa-miR-11400 | NM_001099222 | IFT74      | 4908  | 4928 | 1            | 1    | 0.08           | -0.16           | 20                        | 7                                        | 3UTR         |
| hsa-miR-11400 | NM_001099223 | IFT74      | 4781  | 4801 | 1            | 1    | 0.64           | 0.51            | 20                        | 7                                        | 3UTR         |
| hsa-miR-11400 | NM_006546    | IGF2BP1    | 6197  | 6242 | 1            | 1    | 0.26           | 1.04            | 21                        | 9                                        | 3UTR         |
| hsa-miR-11400 | NM_001160423 | IGF2BP1    | 5780  | 5825 | 1            | 1    | 0.26           | 1.04            | 21                        | 9                                        | 3UTR         |
| hsa-miR-11400 | NM_001291873 | IGF2BP2    | 2135  | 2156 | 1            | 1    | 1.41           | 0.73            | 21                        | 11                                       | 3UTR         |
| hsa-miR-11400 | NM_006548    | IGF2BP2    | 1935  | 1960 | 1            | 1    | 0.75           | 2.07            | 25                        | 8                                        | 3UTR         |
| hsa-miR-11400 | NM_000599    | IGFBP5     | 3601  | 3630 | 1            | 1    | 1.18           | 0.79            | 29                        | 9                                        | 3UTR         |
| hsa-miR-11400 | NM_000599    | IGFBP5     | 5377  | 5399 | 1            | 1    | 3.18           | 2.16            | 22                        | 8                                        | 3UTR         |
| hsa-miR-11400 | NM_001002915 | IGFL2      | 828   | 850  | 1            | 1    | 0.13           | -0.12           | 22                        | 10                                       | 3UTR         |
| hsa-miR-11400 | NM_001135113 | IGFL2      | 545   | 567  | 1            | 1    | 0.13           | -0.11           | 22                        | 10                                       | 3UTR         |
| hsa-miR-11400 | NM_001101372 | IGLON5     | 2732  | 2766 | 1            | 1    | 0.07           | -0.19           | 28                        | 12                                       | 3UTR         |
| hsa-miR-11400 | NM_001291837 | IKZF1      | 2052  | 2098 | 1            | 1    | -0.31          | -0.50           | 20                        | 15                                       | 3UTR         |
| hsa-miR-11400 | NM_001291838 | IKZF1      | 1917  | 1963 | 1            | 1    | -0.31          | -0.50           | 20                        | 15                                       | 3UTR         |
| hsa-miR-11400 | NM_001291841 | IKZF1      | 1542  | 1588 | 1            | 1    | -0.31          | -0.50           | 20                        | 15                                       | 3UTR         |

| mirnaid       | refseqid     | genesymbol | start | end  | binding<br>p | seed | phylopste<br>m | phylopflan<br>k | binding_region_lengt<br>h | longest_<br>consecut<br>ive_pairi<br>ngs | positio<br>n |
|---------------|--------------|------------|-------|------|--------------|------|----------------|-----------------|---------------------------|------------------------------------------|--------------|
| hsa-miR-11400 | NM_001291843 | IKZF1      | 1416  | 1462 | 1            | 1    | -0.31          | -0.50           | 20                        | 15                                       | 3UTR         |
| hsa-miR-11400 | XM_011515075 | IKZF1      | 2074  | 2120 | 1            | 1    | 0.00           | 0.00            | 20                        | 15                                       | 3UTR         |
| hsa-miR-11400 | NM_006060    | IKZF1      | 2178  | 2224 | 1            | 1    | -0.31          | -0.50           | 20                        | 15                                       | 3UTR         |
| hsa-miR-11400 | NM_001220765 | IKZF1      | 2052  | 2098 | 1            | 1    | 0.00           | 0.00            | 20                        | 15                                       | 3UTR         |
| hsa-miR-11400 | NM_001220768 | IKZF1      | 1710  | 1756 | 1            | 1    | -0.31          | -0.50           | 20                        | 15                                       | 3UTR         |
| hsa-miR-11400 | NM_001220771 | IKZF1      | 1542  | 1588 | 1            | 1    | -0.31          | -0.50           | 20                        | 15                                       | 3UTR         |
| hsa-miR-11400 | XM_005246384 | IKZF2      | 5675  | 5707 | 1            | 1    | 0.00           | 0.00            | 16                        | 14                                       | 3UTR         |
| hsa-miR-11400 | NM_016260    | IKZF2      | 5668  | 5700 | 1            | 1    | 0.31           | 0.26            | 16                        | 14                                       | 3UTR         |
| hsa-miR-11400 | NM_001079526 | IKZF2      | 5637  | 5669 | 1            | 1    | 0.29           | 0.32            | 16                        | 14                                       | 3UTR         |
| hsa-miR-11400 | NM_001284516 | IKZF3      | 5923  | 5945 | 0.953846     | 1    | 1.50           | 0.81            | 22                        | 10                                       | 3UTR         |
| hsa-miR-11400 | NM_001372123 | IKZF5      | 3614  | 3635 | 1            | 1    | 5.56           | 4.07            | 21                        | 13                                       | 3UTR         |
| hsa-miR-11400 | NM_000628    | IL10RB     | 1360  | 1393 | 1            | 1    | -0.29          | -0.25           | 17                        | 6                                        | 3UTR         |
| hsa-miR-11400 | NM_002187    | IL12B      | 2005  | 2034 | 1            | 1    | 0.35           | 1.92            | 29                        | 7                                        | 3UTR         |
| hsa-miR-11400 | NM_001289905 | IL17RA     | 3195  | 3220 | 1            | 1    | -0.13          | -0.31           | 25                        | 8                                        | 3UTR         |
| hsa-miR-11400 | NM_014339    | IL17RA     | 3297  | 3322 | 1            | 1    | -0.12          | -0.09           | 25                        | 8                                        | 3UTR         |
| hsa-miR-11400 | NM_001364879 | IL1RAP     | 2694  | 2712 | 1            | 1    | 0.05           | 0.61            | 18                        | 14                                       | 3UTR         |
| hsa-miR-11400 | NM_001167931 | IL1RAP     | 2781  | 2799 | 1            | 1    | 0.05           | 0.61            | 18                        | 14                                       | 3UTR         |

| mirnaid       | refseqid     | genesymbol | start | end  | binding<br>p | seed | phylopste<br>m | phylopflan<br>k | binding_region_lengt<br>h | longest_<br>consecut<br>ive_pairi<br>ngs | positio<br>n |
|---------------|--------------|------------|-------|------|--------------|------|----------------|-----------------|---------------------------|------------------------------------------|--------------|
| hsa-miR-11400 | NM_173841    | IL1RN      | 679   | 697  | 1            | 1    | 0.02           | -0.12           | 18                        | 11                                       | 3UTR         |
| hsa-miR-11400 | NM_173842    | IL1RN      | 649   | 667  | 1            | 1    | 0.02           | -0.12           | 18                        | 11                                       | 3UTR         |
| hsa-miR-11400 | NM_173843    | IL1RN      | 787   | 805  | 1            | 1    | 0.02           | -0.12           | 18                        | 11                                       | 3UTR         |
| hsa-miR-11400 | XM_011511121 | IL1RN      | 1216  | 1234 | 1            | 1    | 0.00           | 0.00            | 18                        | 11                                       | 3UTR         |
| hsa-miR-11400 | NM_000577    | IL1RN      | 616   | 634  | 1            | 1    | 0.02           | -0.12           | 18                        | 11                                       | 3UTR         |
| hsa-miR-11400 | NM_001278722 | IL20RA     | 1988  | 2006 | 1            | 1    | -0.11          | -0.17           | 18                        | 9                                        | 3UTR         |
| hsa-miR-11400 | NM_181309    | IL22RA2    | 1983  | 2022 | 1            | 1    | 1.39           | 1.29            | 20                        | 8                                        | 3UTR         |
| hsa-miR-11400 | NM_181310    | IL22RA2    | 1813  | 1852 | 1            | 1    | 0.52           | 0.30            | 20                        | 8                                        | 3UTR         |
| hsa-miR-11400 | NM_173170    | IL36RN     | 1980  | 2011 | 1            | 1    | -0.14          | -0.29           | 24                        | 9                                        | 3UTR         |
| hsa-miR-11400 | NM_012275    | IL36RN     | 1918  | 1949 | 1            | 1    | -0.14          | -0.29           | 24                        | 9                                        | 3UTR         |
| hsa-miR-11400 | NM_181359    | IL6R       | 2417  | 2436 | 0.955128     | 1    | -0.58          | -0.58           | 19                        | 13                                       | 3UTR         |
| hsa-miR-11400 | NM_000565    | IL6R       | 2511  | 2530 | 0.955128     | 1    | -0.58          | -0.58           | 19                        | 13                                       | 3UTR         |
| hsa-miR-11400 | XM_005248299 | IL7R       | 4182  | 4204 | 1            | 1    | 0.00           | 0.00            | 16                        | 14                                       | 3UTR         |
| hsa-miR-11400 | NM_002185    | IL7R       | 4276  | 4298 | 1            | 1    | 0.05           | 0.08            | 16                        | 14                                       | 3UTR         |
| hsa-miR-11400 | NM_175924    | ILDR1      | 2510  | 2537 | 1            | 1    | 1.24           | 1.72            | 27                        | 8                                        | 3UTR         |
| hsa-miR-11400 | NM_001199800 | ILDR1      | 2375  | 2402 | 1            | 1    | 2.35           | 2.76            | 27                        | 8                                        | 3UTR         |
| hsa-miR-11400 | XM_017001256 | ILDR2      | 5236  | 5254 | 1            | 1    | 0.00           | 0.00            | 18                        | 11                                       | 3UTR         |

| mirnaid       | refseqid     | genesymbol | start | end  | binding<br>p | seed | phylopste<br>m | phylopflan<br>k | binding_region_lengt<br>h | longest_<br>consecut<br>ive_pairi<br>ngs | positio<br>n |
|---------------|--------------|------------|-------|------|--------------|------|----------------|-----------------|---------------------------|------------------------------------------|--------------|
| hsa-miR-11400 | NM_178511    | INAFM1     | 732   | 750  | 1            | 1    | 0.43           | -0.36           | 18                        | 8                                        | 3UTR         |
| hsa-miR-11400 | NM_002193    | INHBB      | 1350  | 1369 | 1            | 1    | 0.01           | 0.36            | 19                        | 15                                       | 3UTR         |
| hsa-miR-11400 | NM_017759    | INO80D     | 7280  | 7299 | 1            | 1    | 0.00           | 0.00            | 19                        | 12                                       | 3UTR         |
| hsa-miR-11400 | XM_011539528 | INPP5F     | 4439  | 4458 | 1            | 1    | 0.00           | 0.00            | 19                        | 10                                       | 3UTR         |
| hsa-miR-11400 | NM_014937    | INPP5F     | 4549  | 4568 | 1            | 1    | 0.17           | -0.14           | 19                        | 10                                       | 3UTR         |
| hsa-miR-11400 | NM_001243194 | INPP5F     | 2721  | 2740 | 1            | 1    | 0.00           | 0.00            | 19                        | 10                                       | 3UTR         |
| hsa-miR-11400 | NM_001135642 | INPP5K     | 1878  | 1896 | 1            | 1    | 2.03           | 4.00            | 18                        | 8                                        | 3UTR         |
| hsa-miR-11400 | NM_001129891 | INSYN2B    | 5115  | 5137 | 1            | 1    | 0.82           | 0.81            | 22                        | 8                                        | 3UTR         |
| hsa-miR-11400 | NM_018085    | IPO9       | 7090  | 7115 | 1            | 1    | 0.16           | 0.00            | 25                        | 8                                        | 3UTR         |
| hsa-miR-11400 | NM_001330619 | IQSEC1     | 6610  | 6633 | 0.961538     | 1    | 4.51           | 5.91            | 23                        | 9                                        | 3UTR         |
| hsa-miR-11400 | NM_001134382 | IQSEC1     | 6967  | 6990 | 0.961538     | 1    | 4.71           | 5.32            | 23                        | 9                                        | 3UTR         |
| hsa-miR-11400 | XM_024453846 | IQSEC1     | 6506  | 6529 | 1            | 1    | 0.00           | 0.00            | 23                        | 9                                        | 3UTR         |
| hsa-miR-11400 | XM_024453846 | IQSEC1     | 6270  | 6292 | 1            | 1    | 0.00           | 0.00            | 22                        | 8                                        | 3UTR         |
| hsa-miR-11400 | NM_014869    | IQSEC1     | 4785  | 4808 | 1            | 1    | 3.94           | 3.48            | 23                        | 9                                        | 3UTR         |
| hsa-miR-11400 | NM_001376938 | IQSEC1     | 7151  | 7174 | 1            | 1    | 3.61           | 2.16            | 23                        | 9                                        | 3UTR         |
| hsa-miR-11400 | NM_001570    | IRAK2      | 1915  | 1933 | 1            | 1    | 0.20           | 0.86            | 18                        | 17                                       | 3UTR         |
| hsa-miR-11400 | NM_016123    | IRAK4      | 2964  | 2986 | 1            | 1    | -0.06          | 0.10            | 22                        | 9                                        | 3UTR         |



| mirnaid       | refseqid     | genesymbol | start | end   | binding<br>p | seed | phylopste<br>m | phylopflan<br>k | binding_region_lengt<br>h | longest_<br>consecut<br>ive_pairi<br>ngs | positio<br>n |
|---------------|--------------|------------|-------|-------|--------------|------|----------------|-----------------|---------------------------|------------------------------------------|--------------|
| hsa-miR-11400 | NM_001114182 | IRAK4      | 3012  | 3034  | 1            | 1    | 0.00           | 0.09            | 22                        | 9                                        | 3UTR         |
| hsa-miR-11400 | NM_001145257 | IRAK4      | 2818  | 2840  | 1            | 1    | 0.00           | 0.09            | 22                        | 9                                        | 3UTR         |
| hsa-miR-11400 | NM_001145258 | IRAK4      | 2648  | 2670  | 1            | 1    | 0.00           | 0.09            | 22                        | 9                                        | 3UTR         |
| hsa-miR-11400 | NM_182972    | IRF2BP2    | 4814  | 4836  | 1            | 1    | 0.00           | 0.00            | 22                        | 9                                        | 3UTR         |
| hsa-miR-11400 | NM_001077397 | IRF2BP2    | 4113  | 4135  | 1            | 1    | 1.01           | 1.41            | 22                        | 9                                        | 3UTR         |
| hsa-miR-11400 | NM_002460    | IRF4       | 1519  | 1539  | 1            | 1    | -0.58          | -0.01           | 20                        | 14                                       | 3UTR         |
| hsa-miR-11400 | NM_001370152 | ISG20L2    | 1957  | 1982  | 1            | 1    | 6.82           | 2.00            | 25                        | 8                                        | 3UTR         |
| hsa-miR-11400 | NM_022334    | ITGB1BP1   | 2959  | 2977  | 0.961538     | 1    | -0.05          | 0.15            | 18                        | 10                                       | 3UTR         |
| hsa-miR-11400 | NM_002217    | ITIH3      | 2768  | 2785  | 1            | 1    | 0.15           | 0.12            | 17                        | 10                                       | 3UTR         |
| hsa-miR-11400 | NM_001001851 | ITIH5      | 2928  | 2947  | 1            | 1    | 0.26           | 1.25            | 19                        | 10                                       | 3UTR         |
| hsa-miR-11400 | NM_001001851 | ITIH5      | 2997  | 3022  | 1            | 1    | 0.77           | -0.08           | 25                        | 13                                       | 3UTR         |
| hsa-miR-11400 | NM_021999    | ITM2B      | 9774  | 9807  | 1            | 1    | 0.06           | -0.19           | 23                        | 7                                        | 3UTR         |
| hsa-miR-11400 | NM_001363707 | ITPK1      | 4997  | 5018  | 1            | 1    | 0.00           | 0.00            | 21                        | 8                                        | 3UTR         |
| hsa-miR-11400 | NM_002223    | ITPR2      | 12137 | 12159 | 1            | 1    | 2.04           | 2.24            | 22                        | 11                                       | 3UTR         |
| hsa-miR-11400 | NM_001287441 | JADE1      | 2874  | 2894  | 1            | 1    | 0.19           | 0.01            | 20                        | 9                                        | 3UTR         |
| hsa-miR-11400 | NM_024900    | JADE1      | 2936  | 2956  | 1            | 1    | 0.19           | 0.01            | 20                        | 9                                        | 3UTR         |
| hsa-miR-11400 | NM_001270407 | JAM2       | 1360  | 1383  | 1            | 1    | 1.37           | 1.63            | 20                        | 11                                       | 3UTR         |

| mirnaid       | refseqid     | genesymbol | start | end  | binding<br>p | seed | phylopste<br>m | phylopflan<br>k | binding_region_lengt<br>h | longest_<br>consecut<br>ive_pairi<br>ngs | positio<br>n |
|---------------|--------------|------------|-------|------|--------------|------|----------------|-----------------|---------------------------|------------------------------------------|--------------|
| hsa-miR-11400 | NM_021219    | JAM2       | 1468  | 1491 | 1            | 1    | 1.25           | 2.38            | 20                        | 11                                       | 3UTR         |
| hsa-miR-11400 | NM_024806    | JHY        | 4249  | 4274 | 1            | 1    | 1.11           | 1.21            | 25                        | 9                                        | 3UTR         |
| hsa-miR-11400 | NM_016475    | JKAMP      | 1839  | 1857 | 1            | 1    | 0.08           | 0.18            | 18                        | 9                                        | 3UTR         |
| hsa-miR-11400 | NM_153186    | KANK1      | 4369  | 4386 | 0.974359     | 1    | 5.44           | 5.07            | 17                        | 8                                        | 3UTR         |
| hsa-miR-11400 | NM_015158    | KANK1      | 4354  | 4371 | 1            | 1    | 0.25           | 0.37            | 17                        | 8                                        | 3UTR         |
| hsa-miR-11400 | XM_017000485 | KANK4      | 1620  | 1639 | 1            | 1    | 0.00           | 0.00            | 19                        | 13                                       | 3UTR         |
| hsa-miR-11400 | NM_030929    | KAZALD1    | 1398  | 1442 | 0.974359     | 1    | -0.13          | -0.35           | 44                        | 14                                       | 3UTR         |
| hsa-miR-11400 | XM_005245795 | KAZN       | 4125  | 4147 | 1            | 1    | 0.00           | 0.00            | 22                        | 7                                        | 3UTR         |
| hsa-miR-11400 | XM_011541396 | KCNA2      | 4889  | 4909 | 1            | 1    | 0.00           | 0.00            | 20                        | 11                                       | 3UTR         |
| hsa-miR-11400 | XM_011541399 | KCNA2      | 4978  | 4998 | 1            | 1    | 0.00           | 0.00            | 20                        | 11                                       | 3UTR         |
| hsa-miR-11400 | XM_011541400 | KCNA2      | 4908  | 4928 | 1            | 1    | 0.00           | 0.00            | 20                        | 11                                       | 3UTR         |
| hsa-miR-11400 | XM_017001213 | KCNA2      | 4870  | 4890 | 1            | 1    | 0.00           | 0.00            | 20                        | 11                                       | 3UTR         |
| hsa-miR-11400 | NM_004976    | KCNC1      | 1705  | 1726 | 1            | 1    | 2.42           | 1.73            | 21                        | 8                                        | 3UTR         |
| hsa-miR-11400 | NM_004977    | KCNC3      | 4012  | 4035 | 1            | 1    | 0.48           | 0.28            | 23                        | 7                                        | 3UTR         |
| hsa-miR-11400 | NM_172198    | KCND3      | 5466  | 5481 | 1            | 1    | 2.02           | 3.21            | 15                        | 14                                       | 3UTR         |
| hsa-miR-11400 | NM_173092    | KCNH6      | 2904  | 2928 | 1            | 1    | 0.12           | 0.05            | 24                        | 8                                        | 3UTR         |
| hsa-miR-11400 | NM_144633    | KCNH8      | 4810  | 4831 | 1            | 1    | 0.19           | -0.02           | 21                        | 8                                        | 3UTR         |

| mirnaid       | refseqid     | genesymbol | start | end   | binding<br>p | seed | phylopste<br>m | phylopflan<br>k | binding_region_lengt<br>h | longest_<br>consecut<br>ive_pairi<br>ngs | positio<br>n |
|---------------|--------------|------------|-------|-------|--------------|------|----------------|-----------------|---------------------------|------------------------------------------|--------------|
| hsa-miR-11400 | NM_001276435 | KCNJ15     | 7875  | 7908  | 1            | 1    | 0.00           | 0.00            | 28                        | 8                                        | 3UTR         |
| hsa-miR-11400 | NM_001276436 | KCNJ15     | 7878  | 7911  | 1            | 1    | 0.00           | 0.00            | 28                        | 8                                        | 3UTR         |
| hsa-miR-11400 | NM_170736    | KCNJ15     | 7744  | 7777  | 1            | 1    | 0.54           | 1.03            | 28                        | 8                                        | 3UTR         |
| hsa-miR-11400 | NM_170737    | KCNJ15     | 7599  | 7632  | 1            | 1    | 0.00           | 0.00            | 28                        | 8                                        | 3UTR         |
| hsa-miR-11400 | NM_002243    | KCNJ15     | 7736  | 7769  | 1            | 1    | 0.54           | 1.03            | 28                        | 8                                        | 3UTR         |
| hsa-miR-11400 | NM_001354169 | KCNJ5      | 3474  | 3494  | 1            | 1    | 0.11           | -0.61           | 20                        | 12                                       | 3UTR         |
| hsa-miR-11400 | NM_000890    | KCNJ5      | 3385  | 3405  | 1            | 1    | 0.11           | -0.61           | 20                        | 12                                       | 3UTR         |
| hsa-miR-11400 | NM_002240    | KCNJ6      | 12588 | 12605 | 1            | 1    | 0.09           | -0.24           | 17                        | 16                                       | 3UTR         |
| hsa-miR-11400 | NM_022055    | KCNK12     | 11797 | 11817 | 1            | 1    | 6.22           | 4.17            | 20                        | 10                                       | 3UTR         |
| hsa-miR-11400 | XM_005264293 | KCNK3      | 2797  | 2819  | 1            | 1    | 0.00           | 0.00            | 22                        | 10                                       | 3UTR         |
| hsa-miR-11400 | XM_011517102 | KCNK9      | 1607  | 1628  | 1            | 1    | 0.00           | 0.00            | 21                        | 9                                        | 3UTR         |
| hsa-miR-11400 | NM_172106    | KCNQ2      | 5929  | 5949  | 0.980769     | 1    | -0.84          | -1.12           | 20                        | 10                                       | 3UTR         |
| hsa-miR-11400 | NM_172107    | KCNQ2      | 5983  | 6003  | 0.980769     | 1    | -0.81          | -0.94           | 20                        | 10                                       | 3UTR         |
| hsa-miR-11400 | NM_172108    | KCNQ2      | 5890  | 5910  | 0.980769     | 1    | -1.69          | -1.04           | 20                        | 10                                       | 3UTR         |
| hsa-miR-11400 | NM_004518    | KCNQ2      | 5899  | 5919  | 0.980769     | 1    | -0.55          | -1.14           | 20                        | 10                                       | 3UTR         |
| hsa-miR-11400 | NM_172106    | KCNQ2      | 3025  | 3044  | 1            | 1    | -0.50          | -0.22           | 19                        | 9                                        | 3UTR         |
| hsa-miR-11400 | NM_172107    | KCNQ2      | 3079  | 3098  | 1            | 1    | -0.31          | -0.13           | 19                        | 9                                        | 3UTR         |

| mirnaid       | refseqid    | genesymbol | start | end  | binding<br>p | seed | phylopste<br>m | phylopflan<br>k | binding_region_lengt<br>h | longest_<br>consecut<br>ive_pairi<br>ngs | positio<br>n |
|---------------|-------------|------------|-------|------|--------------|------|----------------|-----------------|---------------------------|------------------------------------------|--------------|
| hsa-miR-11400 | NM_172108   | KCNQ2      | 2986  | 3005 | 1            | 1    | -0.47          | -0.16           | 19                        | 9                                        | 3UTR         |
| hsa-miR-11400 | XM_01152881 | KCNQ2      | 5973  | 5993 | 1            | 1    | 0.00           | 0.00            | 20                        | 10                                       | 3UTR         |
| hsa-miR-11400 | XM_01152881 | KCNQ2      | 6768  | 6791 | 1            | 1    | 0.00           | 0.00            | 16                        | 8                                        | 3UTR         |
| hsa-miR-11400 | NM_00120482 | KCNQ3      | 6527  | 6548 | 1            | 1    | 0.00           | 0.00            | 21                        | 8                                        | 3UTR         |
| hsa-miR-11400 | NM_172163   | KCNQ4      | 2531  | 2546 | 1            | 1    | 0.36           | 0.27            | 15                        | 14                                       | 3UTR         |
| hsa-miR-11400 | XM_01700279 | KCNQ4      | 1709  | 1724 | 1            | 1    | 0.00           | 0.00            | 15                        | 14                                       | 3UTR         |
| hsa-miR-11400 | NM_004700   | KCNQ4      | 2693  | 2708 | 1            | 1    | 0.36           | 0.27            | 15                        | 14                                       | 3UTR         |
| hsa-miR-11400 | NM_00127200 | KCNT1      | 6220  | 6240 | 1            | 1    | -0.12          | -0.25           | 20                        | 13                                       | 3UTR         |
| hsa-miR-11400 | NM_020822   | KCNT1      | 6292  | 6312 | 1            | 1    | -0.12          | -0.25           | 20                        | 13                                       | 3UTR         |
| hsa-miR-11400 | NM_00128781 | KCNT2      | 3929  | 3964 | 1            | 1    | 2.88           | 3.17            | 35                        | 10                                       | 3UTR         |
| hsa-miR-11400 | NM_198503   | KCNT2      | 4001  | 4036 | 1            | 1    | 2.88           | 3.17            | 35                        | 10                                       | 3UTR         |
| hsa-miR-11400 | NM_00128657 | KCTD20     | 957   | 978  | 0.961538     | 1    | 0.24           | 0.67            | 21                        | 7                                        | 3UTR         |
| hsa-miR-11400 | NM_173562   | KCTD20     | 1455  | 1476 | 0.961538     | 1    | 0.24           | 0.67            | 21                        | 7                                        | 3UTR         |
| hsa-miR-11400 | NM_018992   | KCTD5      | 733   | 754  | 1            | 1    | 1.60           | 2.68            | 21                        | 8                                        | 3UTR         |
| hsa-miR-11400 | NM_006854   | KDEL2      | 1755  | 1765 | 1            | 1    | 3.08           | 2.54            | 10                        | 9                                        | 3UTR         |
| hsa-miR-11400 | NM_00114669 | KDM4C      | 2831  | 2851 | 0.980769     | 1    | -0.20          | 0.14            | 20                        | 11                                       | 3UTR         |
| hsa-miR-11400 | NM_00134871 | KDM6B      | 5809  | 5860 | 1            | 1    | 1.37           | 1.28            | 24                        | 7                                        | 3UTR         |

| mirnaid       | refseqid     | genesymbol | start | end  | binding<br>p | seed | phylopste<br>m | phylopflan<br>k | binding_region_lengt<br>h | longest_<br>consecut<br>ive_pairi<br>ngs | positio<br>n |
|---------------|--------------|------------|-------|------|--------------|------|----------------|-----------------|---------------------------|------------------------------------------|--------------|
| hsa-miR-11400 | NM_001080424 | KDM6B      | 5781  | 5832 | 1            | 1    | 1.10           | 1.40            | 24                        | 7                                        | 3UTR         |
| hsa-miR-11400 | XM_005266677 | KDSR       | 1790  | 1808 | 1            | 1    | 0.00           | 0.00            | 18                        | 8                                        | 3UTR         |
| hsa-miR-11400 | XM_017004060 | KHK        | 1679  | 1723 | 1            | 1    | 0.00           | 0.00            | 21                        | 9                                        | 3UTR         |
| hsa-miR-11400 | NM_014743    | KIAA0232   | 5874  | 5894 | 1            | 1    | 1.53           | 0.63            | 20                        | 12                                       | 3UTR         |
| hsa-miR-11400 | NM_001100590 | KIAA0232   | 5790  | 5810 | 1            | 1    | 1.44           | 0.78            | 20                        | 12                                       | 3UTR         |
| hsa-miR-11400 | NM_014702    | KIAA0408   | 6113  | 6161 | 1            | 1    | 3.46           | 3.40            | 16                        | 14                                       | 3UTR         |
| hsa-miR-11400 | XM_006721612 | KIAA0753   | 3201  | 3222 | 1            | 1    | 0.00           | 0.00            | 21                        | 8                                        | 3UTR         |
| hsa-miR-11400 | NM_014804    | KIAA0753   | 3542  | 3563 | 1            | 1    | 2.64           | 2.60            | 21                        | 8                                        | 3UTR         |
| hsa-miR-11400 | NM_020444    | KIAA1191   | 1937  | 1958 | 1            | 1    | 2.21           | 2.82            | 21                        | 9                                        | 3UTR         |
| hsa-miR-11400 | NM_001079684 | KIAA1191   | 1850  | 1871 | 1            | 1    | 2.08           | 2.38            | 21                        | 9                                        | 3UTR         |
| hsa-miR-11400 | NM_001079685 | KIAA1191   | 1829  | 1850 | 1            | 1    | 1.90           | 2.31            | 21                        | 9                                        | 3UTR         |
| hsa-miR-11400 | NM_020721    | KIAA1210   | 7578  | 7599 | 1            | 1    | 0.00           | 0.00            | 21                        | 9                                        | 3UTR         |
| hsa-miR-11400 | XM_011518311 | KIAA1958   | 9665  | 9684 | 1            | 1    | 0.00           | 0.00            | 19                        | 12                                       | 3UTR         |
| hsa-miR-11400 | NM_006612    | KIF1C      | 4401  | 4419 | 1            | 1    | -0.29          | -0.42           | 18                        | 14                                       | 3UTR         |
| hsa-miR-11400 | NM_004520    | KIF2A      | 6231  | 6256 | 1            | 1    | 0.00           | 0.00            | 25                        | 8                                        | 3UTR         |
| hsa-miR-11400 | NM_001243953 | KIF2A      | 6174  | 6199 | 1            | 1    | 0.00           | 0.00            | 25                        | 8                                        | 3UTR         |
| hsa-miR-11400 | NM_004798    | KIF3B      | 3450  | 3488 | 1            | 1    | 0.34           | 0.26            | 38                        | 12                                       | 3UTR         |

| mirnaid       | refseqid     | genesymbol | start | end  | binding<br>p | seed | phylopste<br>m | phylopflan<br>k | binding_region_lengt<br>h | longest_<br>consecut<br>ive_pairi<br>ngs | positio<br>n |
|---------------|--------------|------------|-------|------|--------------|------|----------------|-----------------|---------------------------|------------------------------------------|--------------|
| hsa-miR-11400 | NM_004984    | KIF5A      | 5464  | 5483 | 1            | 1    | 0.37           | 0.56            | 19                        | 10                                       | 3UTR         |
| hsa-miR-11400 | NM_001354705 | KIF5A      | 5197  | 5216 | 1            | 1    | 0.37           | 0.56            | 19                        | 10                                       | 3UTR         |
| hsa-miR-11400 | NM_001289024 | KIF6       | 1815  | 1836 | 1            | 1    | -0.03          | 0.19            | 21                        | 9                                        | 3UTR         |
| hsa-miR-11400 | NM_145027    | KIF6       | 3329  | 3350 | 1            | 1    | 0.52           | -0.04           | 21                        | 9                                        | 3UTR         |
| hsa-miR-11400 | NM_182902    | KIF9       | 2797  | 2819 | 1            | 1    | 1.20           | 3.27            | 22                        | 14                                       | 3UTR         |
| hsa-miR-11400 | NM_001281972 | KIR2DS4    | 1065  | 1082 | 1            | 1    | 0.08           | -0.22           | 17                        | 6                                        | 3UTR         |
| hsa-miR-11400 | NM_001286349 | KIRREL1    | 4467  | 4487 | 1            | 1    | 0.76           | 0.08            | 20                        | 10                                       | 3UTR         |
| hsa-miR-11400 | NM_018240    | KIRREL1    | 4767  | 4787 | 1            | 1    | 0.05           | -0.30           | 20                        | 10                                       | 3UTR         |
| hsa-miR-11400 | NM_007249    | KLF12      | 3711  | 3736 | 1            | 1    | -0.06          | 0.36            | 25                        | 9                                        | 3UTR         |
| hsa-miR-11400 | NM_007249    | KLF12      | 2658  | 2688 | 1            | 1    | 0.04           | -0.08           | 22                        | 10                                       | 3UTR         |
| hsa-miR-11400 | NM_001271865 | KLHDC8A    | 1739  | 1772 | 1            | 1    | 4.02           | 3.65            | 33                        | 8                                        | 3UTR         |
| hsa-miR-11400 | NM_030624    | KLHL15     | 3462  | 3487 | 1            | 1    | 1.59           | 2.53            | 25                        | 10                                       | 3UTR         |
| hsa-miR-11400 | NM_032775    | KLHL22     | 2381  | 2427 | 1            | 1    | 1.51           | 2.24            | 21                        | 11                                       | 3UTR         |
| hsa-miR-11400 | NM_001308112 | KLHL28     | 4745  | 4770 | 0.961538     | 1    | 4.75           | 5.02            | 25                        | 8                                        | 3UTR         |
| hsa-miR-11400 | NM_001257195 | KLHL3      | 4480  | 4496 | 1            | 1    | -0.14          | -0.16           | 16                        | 9                                        | 3UTR         |
| hsa-miR-11400 | NM_020782    | KLHL42     | 4085  | 4109 | 1            | 1    | 0.07           | -0.07           | 24                        | 8                                        | 3UTR         |
| hsa-miR-11400 | NM_001256080 | CLK2       | 2281  | 2317 | 1            | 1    | 0.04           | 0.05            | 19                        | 9                                        | 3UTR         |

| mirnaid       | refseqid     | genesymbol | start | end   | binding<br>p | seed | phylopste<br>m | phylopflan<br>k | binding_region_lengt<br>h | longest_<br>consecut<br>ive_pairi<br>ngs | positio<br>n |
|---------------|--------------|------------|-------|-------|--------------|------|----------------|-----------------|---------------------------|------------------------------------------|--------------|
| hsa-miR-11400 | NM_002262    | KLRD1      | 13862 | 13882 | 1            | 1    | -0.10          | 0.08            | 20                        | 11                                       | 3UTR         |
| hsa-miR-11400 | NM_001351063 | KLRD1      | 13799 | 13819 | 1            | 1    | -0.10          | 0.08            | 20                        | 11                                       | 3UTR         |
| hsa-miR-11400 | NM_007360    | KLRK1      | 1195  | 1235  | 1            | 1    | 0.81           | 0.22            | 24                        | 7                                        | 3UTR         |
| hsa-miR-11400 | NM_001366306 | KPNA5      | 3476  | 3494  | 1            | 1    | 0.65           | 0.85            | 18                        | 13                                       | 3UTR         |
| hsa-miR-11400 | NM_001366306 | KPNA5      | 9344  | 9361  | 1            | 1    | -0.09          | 0.05            | 17                        | 12                                       | 3UTR         |
| hsa-miR-11400 | NM_033360    | KRAS       | 4038  | 4059  | 1            | 1    | 1.18           | 1.32            | 21                        | 9                                        | 3UTR         |
| hsa-miR-11400 | NM_033360    | KRAS       | 3575  | 3597  | 1            | 1    | 0.52           | 0.44            | 22                        | 8                                        | 3UTR         |
| hsa-miR-11400 | NM_004985    | KRAS       | 3914  | 3935  | 1            | 1    | 0.63           | 1.80            | 21                        | 9                                        | 3UTR         |
| hsa-miR-11400 | NM_001039570 | KREMEN1    | 3806  | 3831  | 1            | 1    | -0.20          | 0.15            | 25                        | 9                                        | 3UTR         |
| hsa-miR-11400 | NM_001039570 | KREMEN1    | 5182  | 5204  | 1            | 1    | 0.85           | 0.13            | 22                        | 9                                        | 3UTR         |
| hsa-miR-11400 | NM_007043    | KRR1       | 4341  | 4360  | 1            | 1    | -0.35          | 0.03            | 19                        | 9                                        | 3UTR         |
| hsa-miR-11400 | NM_001300810 | KRT85      | 1264  | 1301  | 1            | 1    | 2.64           | 2.22            | 37                        | 8                                        | 3UTR         |
| hsa-miR-11400 | NM_031957    | KRTAP1-5   | 763   | 786   | 1            | 1    | 1.55           | 0.70            | 23                        | 8                                        | 3UTR         |
| hsa-miR-11400 | XM_005267161 | L3MBTL3    | 3505  | 3524  | 1            | 1    | 0.00           | 0.00            | 19                        | 11                                       | 3UTR         |
| hsa-miR-11400 | NM_001365767 | L3MBTL4    | 1852  | 1874  | 1            | 1    | -0.04          | 0.17            | 22                        | 8                                        | 3UTR         |
| hsa-miR-11400 | NM_018697    | LANCL2     | 2596  | 2612  | 1            | 1    | -0.88          | -0.54           | 16                        | 15                                       | 3UTR         |
| hsa-miR-11400 | NM_018407    | LAPTM4B    | 1554  | 1573  | 1            | 1    | -0.52          | -0.71           | 19                        | 9                                        | 3UTR         |

| mirnaid       | refseqid     | genesymbol | start | end  | binding<br>p | seed | phylopste<br>m | phylopflan<br>k | binding_region_lengt<br>h | longest_<br>consecut<br>ive_pairi<br>ngs | positio<br>n |
|---------------|--------------|------------|-------|------|--------------|------|----------------|-----------------|---------------------------|------------------------------------------|--------------|
| hsa-miR-11400 | NM_032239    | LARP1B     | 1762  | 1782 | 1            | 1    | 1.48           | 2.12            | 20                        | 16                                       | 3UTR         |
| hsa-miR-11400 | NM_052879    | LARP4      | 2583  | 2600 | 0.974359     | 1    | 2.90           | 2.85            | 17                        | 8                                        | 3UTR         |
| hsa-miR-11400 | NM_199188    | LARP4      | 2580  | 2597 | 0.974359     | 1    | 2.90           | 2.85            | 17                        | 8                                        | 3UTR         |
| hsa-miR-11400 | NM_199190    | LARP4      | 2370  | 2387 | 0.974359     | 1    | 2.90           | 2.85            | 17                        | 8                                        | 3UTR         |
| hsa-miR-11400 | NM_001330415 | LARP4      | 2601  | 2618 | 0.974359     | 1    | 2.90           | 2.85            | 17                        | 8                                        | 3UTR         |
| hsa-miR-11400 | NM_030915    | LBH        | 977   | 994  | 1            | 1    | 0.59           | 0.00            | 17                        | 9                                        | 3UTR         |
| hsa-miR-11400 | NM_004139    | LBP        | 1482  | 1517 | 1            | 1    | -0.04          | 0.70            | 21                        | 15                                       | 3UTR         |
| hsa-miR-11400 | NM_001384302 | LCA5L      | 1411  | 1425 | 1            | 1    | 3.69           | 0.53            | 14                        | 13                                       | 3UTR         |
| hsa-miR-11400 | NM_001365660 | LCORL      | 2021  | 2039 | 1            | 1    | 0.68           | 0.41            | 18                        | 12                                       | 3UTR         |
| hsa-miR-11400 | NM_001282719 | LDAH       | 1130  | 1148 | 1            | 1    | 0.14           | 0.00            | 18                        | 13                                       | 3UTR         |
| hsa-miR-11400 | NM_001282720 | LDAH       | 1112  | 1130 | 1            | 1    | 0.24           | 0.00            | 18                        | 13                                       | 3UTR         |
| hsa-miR-11400 | NM_001282721 | LDAH       | 1100  | 1118 | 1            | 1    | -0.95          | 0.19            | 18                        | 13                                       | 3UTR         |
| hsa-miR-11400 | NM_001282723 | LDAH       | 1021  | 1039 | 1            | 1    | -0.15          | -0.05           | 18                        | 13                                       | 3UTR         |
| hsa-miR-11400 | NM_003893    | LDB1       | 3093  | 3114 | 1            | 1    | 1.73           | 1.61            | 21                        | 10                                       | 3UTR         |
| hsa-miR-11400 | NM_001013693 | LDLRAD2    | 1594  | 1638 | 1            | 1    | 0.34           | -0.01           | 37                        | 9                                        | 3UTR         |
| hsa-miR-11400 | XM_024451250 | LDLRAD4    | 5397  | 5416 | 1            | 1    | 0.00           | 0.00            | 19                        | 12                                       | 3UTR         |
| hsa-miR-11400 | NM_014319    | LEMD3      | 3482  | 3508 | 1            | 1    | 1.08           | 1.98            | 26                        | 14                                       | 3UTR         |



| mirnaid       | refseqid     | genesymbol | start | end  | binding<br>p | seed | phylopste<br>m | phylopflan<br>k | binding_region_lengt<br>h | longest_<br>consecut<br>ive_pairi<br>ngs | positio<br>n |
|---------------|--------------|------------|-------|------|--------------|------|----------------|-----------------|---------------------------|------------------------------------------|--------------|
| hsa-miR-11400 | XM_017026428 | LGI4       | 2105  | 2127 | 1            | 1    | 0.00           | 0.00            | 22                        | 10                                       | 3UTR         |
| hsa-miR-11400 | NM_005779    | LHFPL2     | 2620  | 2637 | 1            | 1    | -0.24          | 0.23            | 17                        | 8                                        | 3UTR         |
| hsa-miR-11400 | NM_198560    | LHFPL4     | 3187  | 3208 | 1            | 1    | 0.28           | -0.17           | 21                        | 10                                       | 3UTR         |
| hsa-miR-11400 | NM_005780    | LHFPL6     | 1942  | 1960 | 1            | 1    | 0.02           | -0.30           | 18                        | 7                                        | 3UTR         |
| hsa-miR-11400 | NM_001348190 | LHX6       | 1681  | 1703 | 1            | 1    | 2.70           | 2.55            | 22                        | 8                                        | 3UTR         |
| hsa-miR-11400 | NM_001242333 | LHX6       | 2249  | 2270 | 1            | 1    | 0.85           | 0.78            | 21                        | 9                                        | 3UTR         |
| hsa-miR-11400 | NM_001278590 | LIAS       | 3378  | 3403 | 1            | 1    | -0.12          | 0.03            | 25                        | 8                                        | 3UTR         |
| hsa-miR-11400 | NM_194451    | LIAS       | 3395  | 3420 | 1            | 1    | -0.12          | 0.03            | 25                        | 8                                        | 3UTR         |
| hsa-miR-11400 | NM_006859    | LIAS       | 3507  | 3532 | 1            | 1    | -0.12          | 0.03            | 25                        | 8                                        | 3UTR         |
| hsa-miR-11400 | NM_001363700 | LIAS       | 3198  | 3223 | 1            | 1    | -0.12          | 0.03            | 25                        | 8                                        | 3UTR         |
| hsa-miR-11400 | NM_001113547 | LIMA1      | 3371  | 3393 | 1            | 1    | 2.18           | 2.37            | 22                        | 12                                       | 3UTR         |
| hsa-miR-11400 | NM_001243775 | LIMA1      | 3127  | 3167 | 1            | 1    | 3.03           | 1.71            | 23                        | 12                                       | 3UTR         |
| hsa-miR-11400 | NM_024674    | LIN28A     | 1589  | 1603 | 1            | 1    | 1.16           | 1.42            | 14                        | 13                                       | 3UTR         |
| hsa-miR-11400 | XM_005262750 | LIN54      | 5038  | 5055 | 0.961538     | 1    | 0.00           | 0.00            | 17                        | 7                                        | 3UTR         |
| hsa-miR-11400 | NM_004664    | LIN7A      | 4224  | 4239 | 1            | 1    | 0.83           | 0.59            | 15                        | 14                                       | 3UTR         |
| hsa-miR-11400 | NM_001288979 | LIPA       | 1483  | 1531 | 1            | 1    | 3.17           | 2.39            | 19                        | 12                                       | 3UTR         |
| hsa-miR-11400 | NM_000235    | LIPA       | 1713  | 1761 | 1            | 1    | 1.65           | 2.04            | 19                        | 12                                       | 3UTR         |

| mirnaid       | refseqid     | genesymbol   | start | end  | binding<br>p | seed | phylopste<br>m | phylopflan<br>k | binding_region_lengt<br>h | longest_<br>consecut<br>ive_pairi<br>ngs | positio<br>n |
|---------------|--------------|--------------|-------|------|--------------|------|----------------|-----------------|---------------------------|------------------------------------------|--------------|
| hsa-miR-11400 | NM_001308006 | LIPG         | 4467  | 4485 | 1            | 1    | 0.11           | 0.06            | 18                        | 17                                       | 3UTR         |
| hsa-miR-11400 | NM_006033    | LIPG         | 4689  | 4707 | 1            | 1    | 0.11           | 0.06            | 18                        | 17                                       | 3UTR         |
| hsa-miR-11400 | NM_001102469 | LIPN         | 1391  | 1410 | 1            | 1    | 0.03           | 0.08            | 19                        | 13                                       | 3UTR         |
| hsa-miR-11400 | NM_001136473 | LITAF        | 537   | 558  | 1            | 1    | 0.35           | -0.18           | 21                        | 11                                       | 3UTR         |
| hsa-miR-11400 | NM_001136473 | LITAF        | 1923  | 1937 | 1            | 1    | 3.64           | 2.05            | 14                        | 13                                       | 3UTR         |
| hsa-miR-11400 | NM_001278233 | LMCD1        | 3651  | 3673 | 1            | 1    | -0.21          | 0.00            | 22                        | 8                                        | 3UTR         |
| hsa-miR-11400 | NM_001278234 | LMCD1        | 3484  | 3506 | 1            | 1    | 0.00           | 0.00            | 22                        | 8                                        | 3UTR         |
| hsa-miR-11400 | NM_014583    | LMCD1        | 3740  | 3762 | 1            | 1    | -0.21          | 0.00            | 22                        | 8                                        | 3UTR         |
| hsa-miR-11400 | NM_014916    | LMTK2        | 5960  | 5989 | 1            | 1    | -0.54          | -0.54           | 20                        | 10                                       | 3UTR         |
| hsa-miR-11400 | NM_177398    | LMX1A        | 3044  | 3066 | 1            | 1    | 4.37           | 3.25            | 22                        | 8                                        | 3UTR         |
| hsa-miR-11400 | NM_175920    | LNPEP        | 4895  | 4915 | 1            | 1    | 0.75           | 0.70            | 20                        | 7                                        | 3UTR         |
| hsa-miR-11400 | NM_005575    | LNPEP        | 4646  | 4666 | 1            | 1    | 0.75           | 0.70            | 20                        | 7                                        | 3UTR         |
| hsa-miR-11400 | NM_030650    | LNPK         | 6796  | 6832 | 1            | 1    | 2.06           | 2.67            | 36                        | 9                                        | 3UTR         |
| hsa-miR-11400 | NM_001004352 | LOC100506422 | 2151  | 2194 | 1            | 1    | 0.51           | 0.37            | 21                        | 12                                       | 3UTR         |
| hsa-miR-11400 | NM_001319657 | LOC102724265 | 1056  | 1081 | 1            | 1    | -0.09          | -0.18           | 19                        | 8                                        | 3UTR         |
| hsa-miR-11400 | NM_001370182 | LOC102724488 | 3999  | 4022 | 1            | 1    | 0.12           | -0.10           | 23                        | 10                                       | 3UTR         |
| hsa-miR-11400 | NM_001370184 | LOC102724488 | 4204  | 4227 | 1            | 1    | 0.14           | 0.10            | 23                        | 10                                       | 3UTR         |

| mirnaid       | refseqid     | genesymbol   | start | end   | binding<br>p | seed | phylopste<br>m | phylopflan<br>k | binding_region_lengt<br>h | longest_<br>consecut<br>ive_pairi<br>ngs | positio<br>n |
|---------------|--------------|--------------|-------|-------|--------------|------|----------------|-----------------|---------------------------|------------------------------------------|--------------|
| hsa-miR-11400 | XM_005255752 | LOC107983990 | 1124  | 1173  | 1            | 1    | 0.00           | 0.00            | 18                        | 16                                       | 3UTR         |
| hsa-miR-11400 | NM_002317    | LOX          | 3068  | 3087  | 1            | 1    | 0.66           | 0.88            | 19                        | 11                                       | 3UTR         |
| hsa-miR-11400 | NM_005296    | LPAR4        | 2352  | 2376  | 0.961538     | 1    | 0.61           | 0.40            | 15                        | 13                                       | 3UTR         |
| hsa-miR-11400 | NM_001278000 | LPAR4        | 2567  | 2591  | 1            | 1    | 0.00           | 0.00            | 15                        | 13                                       | 3UTR         |
| hsa-miR-11400 | NM_014646    | LPIN2        | 5767  | 5787  | 1            | 1    | 3.27           | 5.42            | 20                        | 11                                       | 3UTR         |
| hsa-miR-11400 | NM_005578    | LPP          | 17761 | 17785 | 1            | 1    | -0.04          | 0.19            | 24                        | 9                                        | 3UTR         |
| hsa-miR-11400 | NM_001375462 | LPP          | 17763 | 17787 | 1            | 1    | -0.04          | 0.19            | 24                        | 9                                        | 3UTR         |
| hsa-miR-11400 | NM_020871    | LRCH2        | 3381  | 3402  | 1            | 1    | 2.28           | 2.69            | 21                        | 8                                        | 3UTR         |
| hsa-miR-11400 | NM_001243963 | LRCH2        | 3330  | 3351  | 1            | 1    | 2.28           | 2.69            | 21                        | 8                                        | 3UTR         |
| hsa-miR-11400 | NM_014813    | LRIG2        | 11401 | 11428 | 0.961538     | 1    | 0.29           | 0.38            | 17                        | 15                                       | 3UTR         |
| hsa-miR-11400 | NM_033300    | LRP8         | 5873  | 5902  | 1            | 1    | 4.96           | 3.35            | 29                        | 9                                        | 3UTR         |
| hsa-miR-11400 | NM_017522    | LRP8         | 5594  | 5623  | 1            | 1    | 5.11           | 3.21            | 29                        | 9                                        | 3UTR         |
| hsa-miR-11400 | NM_133259    | LRPPRC       | 5548  | 5567  | 1            | 1    | 3.81           | 3.12            | 19                        | 15                                       | 3UTR         |
| hsa-miR-11400 | NM_005824    | LRRC17       | 1581  | 1628  | 0.953846     | 1    | 2.91           | 2.78            | 19                        | 17                                       | 3UTR         |
| hsa-miR-11400 | NM_030626    | LRRC27       | 6686  | 6710  | 1            | 1    | 0.11           | -0.01           | 24                        | 8                                        | 3UTR         |
| hsa-miR-11400 | NM_001143757 | LRRC27       | 6966  | 6990  | 1            | 1    | 0.11           | -0.01           | 24                        | 8                                        | 3UTR         |
| hsa-miR-11400 | NM_005512    | LRRC32       | 2421  | 2435  | 1            | 1    | 4.41           | 2.86            | 14                        | 13                                       | 3UTR         |

| mirnaid       | refseqid     | genesymbol | start | end  | binding<br>p | seed | phylopste<br>m | phylopflan<br>k | binding_region_lengt<br>h | longest_<br>consecut<br>ive_pairi<br>ngs | positio<br>n |
|---------------|--------------|------------|-------|------|--------------|------|----------------|-----------------|---------------------------|------------------------------------------|--------------|
| hsa-miR-11400 | XM_005264850 | LRRC3B     | 2850  | 2871 | 1            | 1    | 0.00           | 0.00            | 21                        | 11                                       | 3UTR         |
| hsa-miR-11400 | XM_005264850 | LRRC3B     | 3371  | 3391 | 1            | 1    | 0.00           | 0.00            | 20                        | 7                                        | 3UTR         |
| hsa-miR-11400 | NM_006369    | LRRC41     | 3504  | 3550 | 1            | 1    | 2.75           | 2.77            | 22                        | 10                                       | 3UTR         |
| hsa-miR-11400 | NM_001005210 | LRRC55     | 3797  | 3813 | 1            | 1    | 0.03           | 0.51            | 16                        | 15                                       | 3UTR         |
| hsa-miR-11400 | NM_018509    | LRRC59     | 1620  | 1651 | 1            | 1    | 1.04           | 1.55            | 31                        | 8                                        | 3UTR         |
| hsa-miR-11400 | NM_207387    | LRRC75A    | 2492  | 2514 | 1            | 1    | 5.19           | 3.09            | 22                        | 8                                        | 3UTR         |
| hsa-miR-11400 | NM_001113567 | LRRC75A    | 2608  | 2630 | 1            | 1    | 5.29           | 3.33            | 22                        | 8                                        | 3UTR         |
| hsa-miR-11400 | NM_032270    | LRRC8C     | 3468  | 3488 | 1            | 1    | 0.51           | 1.14            | 20                        | 12                                       | 3UTR         |
| hsa-miR-11400 | NM_001137550 | LRRFIP1    | 3678  | 3702 | 1            | 1    | -0.24          | -0.29           | 18                        | 16                                       | 3UTR         |
| hsa-miR-11400 | NM_020873    | LRRN1      | 5096  | 5116 | 1            | 1    | 0.02           | -0.22           | 20                        | 9                                        | 3UTR         |
| hsa-miR-11400 | NM_001039029 | LRTM2      | 2866  | 2888 | 1            | 1    | 0.77           | -0.27           | 20                        | 14                                       | 3UTR         |
| hsa-miR-11400 | NM_001163926 | LRTM2      | 2869  | 2891 | 1            | 1    | 0.77           | -0.27           | 20                        | 14                                       | 3UTR         |
| hsa-miR-11400 | NM_001145308 | LRTOMT     | 2922  | 2942 | 1            | 1    | -0.57          | 1.86            | 20                        | 10                                       | 3UTR         |
| hsa-miR-11400 | NM_152892    | LRWD1      | 2059  | 2076 | 1            | 1    | -0.17          | 0.29            | 17                        | 16                                       | 3UTR         |
| hsa-miR-11400 | NM_018385    | LSG1       | 2121  | 2136 | 0.961538     | 1    | 1.95           | 3.08            | 15                        | 14                                       | 3UTR         |
| hsa-miR-11400 | NM_144703    | LSM14B     | 1705  | 1750 | 1            | 1    | 1.87           | 0.73            | 17                        | 15                                       | 3UTR         |
| hsa-miR-11400 | NM_001145436 | LSS        | 3025  | 3071 | 1            | 1    | 1.62           | 4.05            | 29                        | 8                                        | 3UTR         |

| mirnaid       | refseqid     | genesymbol | start | end  | binding<br>p | seed | phylopste<br>m | phylopflan<br>k | binding_region_lengt<br>h | longest_<br>consecut<br>ive_pairi<br>ngs | positio<br>n |
|---------------|--------------|------------|-------|------|--------------|------|----------------|-----------------|---------------------------|------------------------------------------|--------------|
| hsa-miR-11400 | NM_000595    | LTA        | 1081  | 1101 | 1            | 1    | 0.38           | 0.10            | 20                        | 9                                        | 3UTR         |
| hsa-miR-11400 | NM_001159740 | LTA        | 1127  | 1147 | 1            | 1    | 0.38           | 0.10            | 20                        | 9                                        | 3UTR         |
| hsa-miR-11400 | NM_001142546 | LUZP1      | 4260  | 4281 | 0.961538     | 1    | 0.53           | 0.31            | 21                        | 13                                       | 3UTR         |
| hsa-miR-11400 | XM_011542091 | LUZP1      | 4746  | 4767 | 1            | 1    | 0.00           | 0.00            | 21                        | 13                                       | 3UTR         |
| hsa-miR-11400 | NM_003695    | LY6D       | 585   | 627  | 1            | 1    | 0.06           | -0.49           | 18                        | 16                                       | 3UTR         |
| hsa-miR-11400 | NM_182573    | LYPD5      | 2314  | 2332 | 1            | 1    | 0.80           | 0.60            | 18                        | 12                                       | 3UTR         |
| hsa-miR-11400 | NM_001031749 | LYPD5      | 2350  | 2368 | 1            | 1    | 0.89           | 1.06            | 18                        | 12                                       | 3UTR         |
| hsa-miR-11400 | NM_020408    | LYRM4      | 993   | 1040 | 1            | 1    | 0.50           | 1.12            | 21                        | 15                                       | 3UTR         |
| hsa-miR-11400 | NM_001164841 | LYRM4      | 1145  | 1165 | 1            | 1    | -0.38          | 0.45            | 20                        | 15                                       | 3UTR         |
| hsa-miR-11400 | NM_001293735 | LYRM7      | 2677  | 2695 | 1            | 1    | -0.16          | -0.08           | 18                        | 17                                       | 3UTR         |
| hsa-miR-11400 | NM_181705    | LYRM7      | 2759  | 2777 | 1            | 1    | -0.16          | -0.08           | 18                        | 17                                       | 3UTR         |
| hsa-miR-11400 | NM_021020    | LZTS1      | 4654  | 4673 | 1            | 1    | 2.77           | 1.70            | 19                        | 9                                        | 3UTR         |
| hsa-miR-11400 | XM_005264152 | M1AP       | 1792  | 1812 | 1            | 1    | 0.00           | 0.00            | 20                        | 8                                        | 3UTR         |
| hsa-miR-11400 | NM_002355    | M6PR       | 1033  | 1051 | 1            | 1    | 0.34           | 0.77            | 18                        | 9                                        | 3UTR         |
| hsa-miR-11400 | NM_001282921 | MAB21L4    | 1377  | 1397 | 1            | 1    | 1.94           | 0.94            | 20                        | 9                                        | 3UTR         |
| hsa-miR-11400 | NM_024861    | MAB21L4    | 1320  | 1340 | 1            | 1    | 0.78           | 1.05            | 20                        | 9                                        | 3UTR         |
| hsa-miR-11400 | NM_182762    | MACC1      | 7443  | 7464 | 1            | 1    | 2.76           | 1.95            | 21                        | 7                                        | 3UTR         |

| mirnaid       | refseqid     | genesymbol | start | end  | binding<br>p | seed | phylopste<br>m | phylopflan<br>k | binding_region_lengt<br>h | longest_<br>consecut<br>ive_pairi<br>ngs | positio<br>n |
|---------------|--------------|------------|-------|------|--------------|------|----------------|-----------------|---------------------------|------------------------------------------|--------------|
| hsa-miR-11400 | NM_001304524 | MAD1L1     | 2085  | 2105 | 1            | 1    | 1.70           | 0.66            | 20                        | 15                                       | 3UTR         |
| hsa-miR-11400 | NM_003550    | MAD1L1     | 2463  | 2483 | 1            | 1    | -0.22          | 0.28            | 20                        | 15                                       | 3UTR         |
| hsa-miR-11400 | NM_001013837 | MAD1L1     | 2423  | 2443 | 1            | 1    | 0.45           | 1.41            | 20                        | 15                                       | 3UTR         |
| hsa-miR-11400 | NM_002358    | MAD2L1     | 3389  | 3407 | 1            | 1    | 0.13           | -0.06           | 18                        | 11                                       | 3UTR         |
| hsa-miR-11400 | NM_012323    | MAFF       | 988   | 1032 | 1            | 1    | -0.18          | -0.35           | 23                        | 9                                        | 3UTR         |
| hsa-miR-11400 | NM_001161572 | MAFF       | 1014  | 1058 | 1            | 1    | 0.34           | -0.18           | 23                        | 9                                        | 3UTR         |
| hsa-miR-11400 | NM_001161573 | MAFF       | 834   | 878  | 1            | 1    | 0.00           | 0.00            | 23                        | 9                                        | 3UTR         |
| hsa-miR-11400 | NM_001161574 | MAFF       | 921   | 965  | 1            | 1    | 0.34           | -0.18           | 23                        | 9                                        | 3UTR         |
| hsa-miR-11400 | XM_006715773 | MAFK       | 916   | 937  | 1            | 1    | 0.00           | 0.00            | 21                        | 10                                       | 3UTR         |
| hsa-miR-11400 | XM_011545567 | MAGEB17    | 2324  | 2346 | 1            | 1    | 0.00           | 0.00            | 22                        | 11                                       | 3UTR         |
| hsa-miR-11400 | NM_177456    | MAGEC3     | 1637  | 1657 | 1            | 1    | 0.00           | 0.00            | 20                        | 6                                        | 3UTR         |
| hsa-miR-11400 | XM_011531267 | MAGEC3     | 1473  | 1493 | 1            | 1    | 0.00           | 0.00            | 20                        | 6                                        | 3UTR         |
| hsa-miR-11400 | NM_032509    | MAK16      | 2070  | 2109 | 1            | 1    | 0.02           | 0.06            | 20                        | 10                                       | 3UTR         |
| hsa-miR-11400 | NM_173844    | MALT1      | 4845  | 4865 | 1            | 1    | -0.02          | 0.28            | 20                        | 12                                       | 3UTR         |
| hsa-miR-11400 | NM_006785    | MALT1      | 4878  | 4898 | 1            | 1    | -0.02          | 0.28            | 20                        | 12                                       | 3UTR         |
| hsa-miR-11400 | NM_001385185 | MAN1C1     | 1383  | 1401 | 1            | 1    | 0.31           | 0.51            | 18                        | 11                                       | 3UTR         |
| hsa-miR-11400 | XM_017028006 | MANBAL     | 1633  | 1673 | 1            | 1    | 0.00           | 0.00            | 25                        | 7                                        | 3UTR         |

| mirnaid       | refseqid     | genesymbol | start | end   | binding<br>p | seed | phylopste<br>m | phylopflan<br>k | binding_region_lengt<br>h | longest_<br>consecut<br>ive_pairi<br>ngs | positio<br>n |
|---------------|--------------|------------|-------|-------|--------------|------|----------------|-----------------|---------------------------|------------------------------------------|--------------|
| hsa-miR-11400 | NM_001369742 | MANBAL     | 756   | 796   | 1            | 1    | 0.03           | 0.18            | 25                        | 7                                        | 3UTR         |
| hsa-miR-11400 | NM_001376532 | MANBAL     | 807   | 847   | 1            | 1    | 0.03           | 0.18            | 25                        | 7                                        | 3UTR         |
| hsa-miR-11400 | NM_001003897 | MANBAL     | 451   | 491   | 1            | 1    | 0.03           | 0.18            | 25                        | 7                                        | 3UTR         |
| hsa-miR-11400 | NM_000240    | MAOA       | 2977  | 2994  | 1            | 1    | 0.35           | 0.32            | 17                        | 8                                        | 3UTR         |
| hsa-miR-11400 | NM_002758    | MAP2K6     | 10473 | 10499 | 1            | 1    | 0.10           | 0.02            | 21                        | 7                                        | 3UTR         |
| hsa-miR-11400 | NM_001330450 | MAP2K6     | 10593 | 10619 | 1            | 1    | 0.10           | 0.02            | 21                        | 7                                        | 3UTR         |
| hsa-miR-11400 | NM_203351    | MAP3K3     | 4224  | 4249  | 1            | 1    | 0.43           | 0.41            | 25                        | 11                                       | 3UTR         |
| hsa-miR-11400 | NM_002401    | MAP3K3     | 4131  | 4156  | 1            | 1    | 0.43           | 0.41            | 25                        | 11                                       | 3UTR         |
| hsa-miR-11400 | NM_001330431 | MAP3K3     | 4119  | 4144  | 1            | 1    | 0.43           | 0.41            | 25                        | 11                                       | 3UTR         |
| hsa-miR-11400 | NM_001363768 | MAP3K3     | 4212  | 4237  | 1            | 1    | 0.43           | 0.41            | 25                        | 11                                       | 3UTR         |
| hsa-miR-11400 | NM_030885    | MAP4       | 1981  | 1997  | 1            | 1    | 0.34           | 1.23            | 16                        | 15                                       | 3UTR         |
| hsa-miR-11400 | NM_001270425 | MAP4K3     | 3936  | 3961  | 1            | 1    | 4.16           | 3.70            | 25                        | 10                                       | 3UTR         |
| hsa-miR-11400 | NM_003618    | MAP4K3     | 3999  | 4024  | 1            | 1    | 4.16           | 3.70            | 25                        | 10                                       | 3UTR         |
| hsa-miR-11400 | NM_024597    | MAP7D3     | 3984  | 4004  | 0.980769     | 1    | 1.60           | 1.50            | 20                        | 7                                        | 3UTR         |
| hsa-miR-11400 | NM_002745    | MAPK1      | 4111  | 4157  | 1            | 1    | 1.97           | 0.92            | 16                        | 14                                       | 3UTR         |
| hsa-miR-11400 | NM_001318067 | MAPK10     | 3519  | 3547  | 1            | 1    | 0.34           | 0.42            | 28                        | 8                                        | 3UTR         |
| hsa-miR-11400 | NM_138982    | MAPK10     | 5427  | 5446  | 1            | 1    | 0.18           | 0.20            | 19                        | 12                                       | 3UTR         |

| mirnaid       | refseqid     | genesymbol | start | end  | binding<br>p | seed | phylopste<br>m | phylopflan<br>k | binding_region_lengt<br>h | longest_<br>consecut<br>ive_pairi<br>ngs | positio<br>n |
|---------------|--------------|------------|-------|------|--------------|------|----------------|-----------------|---------------------------|------------------------------------------|--------------|
| hsa-miR-11400 | XM_005263129 | MAPK10     | 5198  | 5217 | 1            | 1    | 0.00           | 0.00            | 19                        | 12                                       | 3UTR         |
| hsa-miR-11400 | XM_005263129 | MAPK10     | 3686  | 3714 | 1            | 1    | 0.00           | 0.00            | 28                        | 8                                        | 3UTR         |
| hsa-miR-11400 | XM_005263130 | MAPK10     | 5193  | 5212 | 1            | 1    | 0.00           | 0.00            | 19                        | 12                                       | 3UTR         |
| hsa-miR-11400 | XM_005263130 | MAPK10     | 3681  | 3709 | 1            | 1    | 0.00           | 0.00            | 28                        | 8                                        | 3UTR         |
| hsa-miR-11400 | XM_005263131 | MAPK10     | 5434  | 5453 | 1            | 1    | 0.00           | 0.00            | 19                        | 12                                       | 3UTR         |
| hsa-miR-11400 | XM_005263131 | MAPK10     | 3922  | 3950 | 1            | 1    | 0.00           | 0.00            | 28                        | 8                                        | 3UTR         |
| hsa-miR-11400 | XM_005263135 | MAPK10     | 5439  | 5458 | 1            | 1    | 0.00           | 0.00            | 19                        | 12                                       | 3UTR         |
| hsa-miR-11400 | XM_005263135 | MAPK10     | 3927  | 3955 | 1            | 1    | 0.00           | 0.00            | 28                        | 8                                        | 3UTR         |
| hsa-miR-11400 | XM_006714268 | MAPK10     | 5363  | 5382 | 1            | 1    | 0.00           | 0.00            | 19                        | 12                                       | 3UTR         |
| hsa-miR-11400 | XM_006714268 | MAPK10     | 3851  | 3879 | 1            | 1    | 0.00           | 0.00            | 28                        | 8                                        | 3UTR         |
| hsa-miR-11400 | XM_006714269 | MAPK10     | 5439  | 5458 | 1            | 1    | 0.00           | 0.00            | 19                        | 12                                       | 3UTR         |
| hsa-miR-11400 | XM_006714269 | MAPK10     | 3927  | 3955 | 1            | 1    | 0.00           | 0.00            | 28                        | 8                                        | 3UTR         |
| hsa-miR-11400 | XM_011532118 | MAPK10     | 5289  | 5308 | 1            | 1    | 0.00           | 0.00            | 19                        | 12                                       | 3UTR         |
| hsa-miR-11400 | XM_011532118 | MAPK10     | 3777  | 3805 | 1            | 1    | 0.00           | 0.00            | 28                        | 8                                        | 3UTR         |
| hsa-miR-11400 | XM_011532120 | MAPK10     | 5259  | 5278 | 1            | 1    | 0.00           | 0.00            | 19                        | 12                                       | 3UTR         |
| hsa-miR-11400 | XM_011532120 | MAPK10     | 3747  | 3775 | 1            | 1    | 0.00           | 0.00            | 28                        | 8                                        | 3UTR         |
| hsa-miR-11400 | XM_011532121 | MAPK10     | 5125  | 5144 | 1            | 1    | 0.00           | 0.00            | 19                        | 12                                       | 3UTR         |



| mirnaid       | refseqid     | genesymbol | start | end  | binding<br>p | seed | phylopste<br>m | phylopflan<br>k | binding_region_lengt<br>h | longest_<br>consecut<br>ive_pairi<br>ngs | positio<br>n |
|---------------|--------------|------------|-------|------|--------------|------|----------------|-----------------|---------------------------|------------------------------------------|--------------|
| hsa-miR-11400 | XM_011532121 | MAPK10     | 3613  | 3641 | 1            | 1    | 0.00           | 0.00            | 28                        | 8                                        | 3UTR         |
| hsa-miR-11400 | XM_017008420 | MAPK10     | 5820  | 5839 | 1            | 1    | 0.00           | 0.00            | 19                        | 12                                       | 3UTR         |
| hsa-miR-11400 | XM_017008420 | MAPK10     | 4308  | 4336 | 1            | 1    | 0.00           | 0.00            | 28                        | 8                                        | 3UTR         |
| hsa-miR-11400 | XM_017008423 | MAPK10     | 5108  | 5127 | 1            | 1    | 0.00           | 0.00            | 19                        | 12                                       | 3UTR         |
| hsa-miR-11400 | XM_017008423 | MAPK10     | 3596  | 3624 | 1            | 1    | 0.00           | 0.00            | 28                        | 8                                        | 3UTR         |
| hsa-miR-11400 | XM_017008427 | MAPK10     | 5455  | 5474 | 1            | 1    | 0.00           | 0.00            | 19                        | 12                                       | 3UTR         |
| hsa-miR-11400 | XM_017008427 | MAPK10     | 3943  | 3971 | 1            | 1    | 0.00           | 0.00            | 28                        | 8                                        | 3UTR         |
| hsa-miR-11400 | XM_017008429 | MAPK10     | 5468  | 5487 | 1            | 1    | 0.00           | 0.00            | 19                        | 12                                       | 3UTR         |
| hsa-miR-11400 | XM_017008429 | MAPK10     | 3956  | 3984 | 1            | 1    | 0.00           | 0.00            | 28                        | 8                                        | 3UTR         |
| hsa-miR-11400 | XM_017008430 | MAPK10     | 5203  | 5222 | 1            | 1    | 0.00           | 0.00            | 19                        | 12                                       | 3UTR         |
| hsa-miR-11400 | XM_017008430 | MAPK10     | 3691  | 3719 | 1            | 1    | 0.00           | 0.00            | 28                        | 8                                        | 3UTR         |
| hsa-miR-11400 | XM_017008433 | MAPK10     | 5383  | 5402 | 1            | 1    | 0.00           | 0.00            | 19                        | 12                                       | 3UTR         |
| hsa-miR-11400 | XM_017008433 | MAPK10     | 3871  | 3899 | 1            | 1    | 0.00           | 0.00            | 28                        | 8                                        | 3UTR         |
| hsa-miR-11400 | XM_017008434 | MAPK10     | 5466  | 5485 | 1            | 1    | 0.00           | 0.00            | 19                        | 12                                       | 3UTR         |
| hsa-miR-11400 | XM_017008434 | MAPK10     | 3954  | 3982 | 1            | 1    | 0.00           | 0.00            | 28                        | 8                                        | 3UTR         |
| hsa-miR-11400 | XM_017008435 | MAPK10     | 5368  | 5387 | 1            | 1    | 0.00           | 0.00            | 19                        | 12                                       | 3UTR         |
| hsa-miR-11400 | XM_017008435 | MAPK10     | 3856  | 3884 | 1            | 1    | 0.00           | 0.00            | 28                        | 8                                        | 3UTR         |

| mirnaid       | refseqid     | genesymbol | start | end  | binding<br>p | seed | phylopste<br>m | phylopflan<br>k | binding_region_lengt<br>h | longest_<br>consecut<br>ive_pairi<br>ngs | positio<br>n |
|---------------|--------------|------------|-------|------|--------------|------|----------------|-----------------|---------------------------|------------------------------------------|--------------|
| hsa-miR-11400 | XM_017008436 | MAPK10     | 5113  | 5132 | 1            | 1    | 0.00           | 0.00            | 19                        | 12                                       | 3UTR         |
| hsa-miR-11400 | XM_017008436 | MAPK10     | 3601  | 3629 | 1            | 1    | 0.00           | 0.00            | 28                        | 8                                        | 3UTR         |
| hsa-miR-11400 | XM_017008437 | MAPK10     | 5130  | 5149 | 1            | 1    | 0.00           | 0.00            | 19                        | 12                                       | 3UTR         |
| hsa-miR-11400 | XM_017008437 | MAPK10     | 3618  | 3646 | 1            | 1    | 0.00           | 0.00            | 28                        | 8                                        | 3UTR         |
| hsa-miR-11400 | XM_017008441 | MAPK10     | 5388  | 5407 | 1            | 1    | 0.00           | 0.00            | 19                        | 12                                       | 3UTR         |
| hsa-miR-11400 | XM_017008441 | MAPK10     | 3876  | 3904 | 1            | 1    | 0.00           | 0.00            | 28                        | 8                                        | 3UTR         |
| hsa-miR-11400 | XM_017008445 | MAPK10     | 5257  | 5276 | 1            | 1    | 0.00           | 0.00            | 19                        | 12                                       | 3UTR         |
| hsa-miR-11400 | XM_017008445 | MAPK10     | 3745  | 3773 | 1            | 1    | 0.00           | 0.00            | 28                        | 8                                        | 3UTR         |
| hsa-miR-11400 | XM_017008451 | MAPK10     | 5262  | 5281 | 1            | 1    | 0.00           | 0.00            | 19                        | 12                                       | 3UTR         |
| hsa-miR-11400 | XM_017008451 | MAPK10     | 3750  | 3778 | 1            | 1    | 0.00           | 0.00            | 28                        | 8                                        | 3UTR         |
| hsa-miR-11400 | XM_017008452 | MAPK10     | 5400  | 5419 | 1            | 1    | 0.00           | 0.00            | 19                        | 12                                       | 3UTR         |
| hsa-miR-11400 | XM_017008452 | MAPK10     | 3888  | 3916 | 1            | 1    | 0.00           | 0.00            | 28                        | 8                                        | 3UTR         |
| hsa-miR-11400 | XM_024454140 | MAPK10     | 5381  | 5400 | 1            | 1    | 0.00           | 0.00            | 19                        | 12                                       | 3UTR         |
| hsa-miR-11400 | XM_024454140 | MAPK10     | 3869  | 3897 | 1            | 1    | 0.00           | 0.00            | 28                        | 8                                        | 3UTR         |
| hsa-miR-11400 | XM_024454141 | MAPK10     | 5899  | 5918 | 1            | 1    | 0.00           | 0.00            | 19                        | 12                                       | 3UTR         |
| hsa-miR-11400 | XM_024454141 | MAPK10     | 4387  | 4415 | 1            | 1    | 0.00           | 0.00            | 28                        | 8                                        | 3UTR         |
| hsa-miR-11400 | XM_024454142 | MAPK10     | 5270  | 5289 | 1            | 1    | 0.00           | 0.00            | 19                        | 12                                       | 3UTR         |

| mirnaid       | refseqid     | genesymbol | start | end  | binding<br>p | seed | phylopste<br>m | phylopflan<br>k | binding_region_lengt<br>h | longest_<br>consecut<br>ive_pairi<br>ngs | positio<br>n |
|---------------|--------------|------------|-------|------|--------------|------|----------------|-----------------|---------------------------|------------------------------------------|--------------|
| hsa-miR-11400 | XM_024454142 | MAPK10     | 3758  | 3786 | 1            | 1    | 0.00           | 0.00            | 28                        | 8                                        | 3UTR         |
| hsa-miR-11400 | XM_024454144 | MAPK10     | 5341  | 5360 | 1            | 1    | 0.00           | 0.00            | 19                        | 12                                       | 3UTR         |
| hsa-miR-11400 | XM_024454144 | MAPK10     | 3829  | 3857 | 1            | 1    | 0.00           | 0.00            | 28                        | 8                                        | 3UTR         |
| hsa-miR-11400 | XM_024454146 | MAPK10     | 5131  | 5150 | 1            | 1    | 0.00           | 0.00            | 19                        | 12                                       | 3UTR         |
| hsa-miR-11400 | XM_024454146 | MAPK10     | 3619  | 3647 | 1            | 1    | 0.00           | 0.00            | 28                        | 8                                        | 3UTR         |
| hsa-miR-11400 | XM_024454147 | MAPK10     | 5099  | 5118 | 1            | 1    | 0.00           | 0.00            | 19                        | 12                                       | 3UTR         |
| hsa-miR-11400 | XM_024454147 | MAPK10     | 3587  | 3615 | 1            | 1    | 0.00           | 0.00            | 28                        | 8                                        | 3UTR         |
| hsa-miR-11400 | NM_002753    | MAPK10     | 5202  | 5221 | 1            | 1    | 0.28           | 0.90            | 19                        | 12                                       | 3UTR         |
| hsa-miR-11400 | NM_001351624 | MAPK10     | 5444  | 5463 | 1            | 1    | 0.32           | 0.29            | 19                        | 12                                       | 3UTR         |
| hsa-miR-11400 | NM_001363657 | MAPK10     | 5459  | 5478 | 1            | 1    | 0.04           | 0.16            | 19                        | 12                                       | 3UTR         |
| hsa-miR-11400 | NM_002754    | MAPK13     | 1988  | 2009 | 1            | 1    | 1.56           | 0.31            | 21                        | 8                                        | 3UTR         |
| hsa-miR-11400 | XM_011532055 | MARCHF1    | 3768  | 3790 | 1            | 1    | 0.00           | 0.00            | 22                        | 9                                        | 3UTR         |
| hsa-miR-11400 | XM_011532055 | MARCHF1    | 2772  | 2787 | 1            | 1    | 0.00           | 0.00            | 15                        | 8                                        | 3UTR         |
| hsa-miR-11400 | XM_017008334 | MARCHF1    | 2988  | 3010 | 1            | 1    | 0.00           | 0.00            | 22                        | 9                                        | 3UTR         |
| hsa-miR-11400 | XM_017008334 | MARCHF1    | 1992  | 2007 | 1            | 1    | 0.00           | 0.00            | 15                        | 8                                        | 3UTR         |
| hsa-miR-11400 | NM_017923    | MARCHF1    | 1862  | 1877 | 1            | 1    | -0.04          | 0.32            | 15                        | 8                                        | 3UTR         |
| hsa-miR-11400 | NM_001166373 | MARCHF1    | 3323  | 3345 | 1            | 1    | -0.25          | 0.19            | 22                        | 9                                        | 3UTR         |

| mirnaid       | refseqid     | genesymbol | start | end  | binding<br>p | seed | phylopste<br>m | phylopflan<br>k | binding_region_lengt<br>h | longest_<br>consecut<br>ive_pairi<br>ngs | positio<br>n |
|---------------|--------------|------------|-------|------|--------------|------|----------------|-----------------|---------------------------|------------------------------------------|--------------|
| hsa-miR-11400 | NM_001166373 | MARCHF1    | 2322  | 2342 | 1            | 1    | 0.26           | -0.09           | 20                        | 8                                        | 3UTR         |
| hsa-miR-11400 | NM_001270660 | MARCHF6    | 8310  | 8328 | 1            | 1    | 0.43           | -0.07           | 18                        | 11                                       | 3UTR         |
| hsa-miR-11400 | NM_001270661 | MARCHF6    | 8139  | 8157 | 1            | 1    | 0.43           | -0.07           | 18                        | 11                                       | 3UTR         |
| hsa-miR-11400 | NM_005885    | MARCHF6    | 8454  | 8472 | 1            | 1    | 0.43           | -0.07           | 18                        | 11                                       | 3UTR         |
| hsa-miR-11400 | NM_002377    | MAS1       | 9445  | 9465 | 1            | 1    | -0.24          | -0.01           | 20                        | 10                                       | 3UTR         |
| hsa-miR-11400 | NM_001366704 | MAS1       | 9288  | 9308 | 1            | 1    | 0.00           | 0.00            | 20                        | 10                                       | 3UTR         |
| hsa-miR-11400 | NM_005911    | MAT2A      | 2319  | 2336 | 1            | 1    | 5.00           | 2.39            | 17                        | 8                                        | 3UTR         |
| hsa-miR-11400 | NM_020746    | MAVS       | 2737  | 2757 | 1            | 1    | -0.53          | -0.04           | 20                        | 14                                       | 3UTR         |
| hsa-miR-11400 | NM_001206491 | MAVS       | 2562  | 2582 | 1            | 1    | 0.00           | 0.00            | 20                        | 14                                       | 3UTR         |
| hsa-miR-11400 | NM_001206491 | MAVS       | 3998  | 4023 | 1            | 1    | 0.00           | 0.00            | 25                        | 11                                       | 3UTR         |
| hsa-miR-11400 | XM_005258271 | MBD1       | 3704  | 3725 | 1            | 1    | 0.00           | 0.00            | 21                        | 11                                       | 3UTR         |
| hsa-miR-11400 | XM_011525993 | MBD1       | 2129  | 2150 | 1            | 1    | 0.00           | 0.00            | 21                        | 11                                       | 3UTR         |
| hsa-miR-11400 | XM_017025770 | MBD1       | 3536  | 3557 | 1            | 1    | 0.00           | 0.00            | 21                        | 11                                       | 3UTR         |
| hsa-miR-11400 | NM_001204137 | MBD1       | 3807  | 3828 | 1            | 1    | 0.00           | 0.00            | 21                        | 11                                       | 3UTR         |
| hsa-miR-11400 | NM_133486    | MBNL3      | 2717  | 2754 | 1            | 1    | 2.51           | 2.78            | 18                        | 8                                        | 3UTR         |
| hsa-miR-11400 | XM_024452402 | MBNL3      | 3524  | 3561 | 1            | 1    | 0.00           | 0.00            | 18                        | 8                                        | 3UTR         |
| hsa-miR-11400 | NM_018388    | MBNL3      | 2748  | 2785 | 1            | 1    | 0.00           | 0.00            | 18                        | 8                                        | 3UTR         |

| mirnaid       | refseqid     | genesymbol | start | end  | binding<br>p | seed | phylopste<br>m | phylopflan<br>k | binding_region_lengt<br>h | longest_<br>consecut<br>ive_pairi<br>ngs | positio<br>n |
|---------------|--------------|------------|-------|------|--------------|------|----------------|-----------------|---------------------------|------------------------------------------|--------------|
| hsa-miR-11400 | NM_001170701 | MBNL3      | 2618  | 2655 | 1            | 1    | 0.88           | 1.48            | 18                        | 8                                        | 3UTR         |
| hsa-miR-11400 | NM_001170702 | MBNL3      | 2582  | 2619 | 1            | 1    | 1.05           | 0.87            | 18                        | 8                                        | 3UTR         |
| hsa-miR-11400 | NM_001170703 | MBNL3      | 2518  | 2555 | 1            | 1    | 1.45           | 1.01            | 18                        | 8                                        | 3UTR         |
| hsa-miR-11400 | NM_001170704 | MBNL3      | 2852  | 2889 | 1            | 1    | 1.66           | 1.63            | 18                        | 8                                        | 3UTR         |
| hsa-miR-11400 | NM_138799    | MBOAT2     | 6283  | 6311 | 1            | 1    | 3.70           | 3.39            | 18                        | 16                                       | 3UTR         |
| hsa-miR-11400 | NM_005913    | MC5R       | 1431  | 1457 | 1            | 1    | -0.02          | -0.46           | 20                        | 8                                        | 3UTR         |
| hsa-miR-11400 | NM_002387    | MCC        | 5220  | 5242 | 1            | 1    | 3.82           | 3.18            | 22                        | 8                                        | 3UTR         |
| hsa-miR-11400 | NM_139279    | MCFD2      | 1316  | 1356 | 1            | 1    | 0.09           | 0.07            | 34                        | 10                                       | 3UTR         |
| hsa-miR-11400 | NM_032503    | MCHR2      | 2220  | 2245 | 1            | 1    | 0.00           | 0.00            | 25                        | 8                                        | 3UTR         |
| hsa-miR-11400 | NM_001281520 | MCM8       | 4695  | 4714 | 1            | 1    | 0.00           | 0.00            | 19                        | 10                                       | 3UTR         |
| hsa-miR-11400 | NM_001281520 | MCM8       | 4293  | 4310 | 1            | 1    | 0.00           | 0.00            | 17                        | 8                                        | 3UTR         |
| hsa-miR-11400 | NM_001281521 | MCM8       | 4761  | 4780 | 1            | 1    | 0.00           | 0.00            | 19                        | 10                                       | 3UTR         |
| hsa-miR-11400 | NM_001281521 | MCM8       | 4359  | 4376 | 1            | 1    | 0.00           | 0.00            | 17                        | 8                                        | 3UTR         |
| hsa-miR-11400 | NM_001281522 | MCM8       | 4500  | 4519 | 1            | 1    | 0.00           | 0.00            | 19                        | 10                                       | 3UTR         |
| hsa-miR-11400 | NM_001281522 | MCM8       | 4098  | 4115 | 1            | 1    | 0.00           | 0.00            | 17                        | 8                                        | 3UTR         |
| hsa-miR-11400 | NM_032485    | MCM8       | 4641  | 4660 | 1            | 1    | 0.16           | 0.08            | 19                        | 10                                       | 3UTR         |
| hsa-miR-11400 | NM_182802    | MCM8       | 4647  | 4666 | 1            | 1    | 0.16           | 0.08            | 19                        | 10                                       | 3UTR         |

| mirnaid       | refseqid     | genesymbol | start | end  | binding<br>p | seed | phylopste<br>m | phylopflan<br>k | binding_region_lengt<br>h | longest_<br>consecut<br>ive_pairi<br>ngs | positio<br>n |
|---------------|--------------|------------|-------|------|--------------|------|----------------|-----------------|---------------------------|------------------------------------------|--------------|
| hsa-miR-11400 | NM_173518    | MCMD2      | 4803  | 4844 | 1            | 1    | -0.04          | -0.17           | 34                        | 10                                       | 3UTR         |
| hsa-miR-11400 | NM_001288798 | MCRIP1     | 1099  | 1117 | 1            | 1    | 0.00           | 0.00            | 18                        | 10                                       | 3UTR         |
| hsa-miR-11400 | NM_001288799 | MCRIP1     | 1162  | 1180 | 1            | 1    | 0.00           | 0.00            | 18                        | 10                                       | 3UTR         |
| hsa-miR-11400 | NM_207368    | MCRIP1     | 1264  | 1282 | 1            | 1    | 0.00           | 0.00            | 18                        | 10                                       | 3UTR         |
| hsa-miR-11400 | NM_001093767 | MCRIP1     | 963   | 981  | 1            | 1    | 0.00           | 0.00            | 18                        | 10                                       | 3UTR         |
| hsa-miR-11400 | NM_001385001 | MCTP2      | 7264  | 7295 | 1            | 1    | 0.09           | 0.07            | 31                        | 9                                        | 3UTR         |
| hsa-miR-11400 | NM_001385004 | MCTP2      | 7099  | 7130 | 1            | 1    | 0.09           | 0.07            | 31                        | 9                                        | 3UTR         |
| hsa-miR-11400 | NM_001282940 | MDH1B      | 1761  | 1782 | 1            | 1    | 1.12           | 1.33            | 21                        | 12                                       | 3UTR         |
| hsa-miR-11400 | NM_001330223 | MDH1B      | 1651  | 1672 | 1            | 1    | 1.73           | 1.22            | 21                        | 12                                       | 3UTR         |
| hsa-miR-11400 | NM_001039845 | MDH1B      | 1764  | 1785 | 1            | 1    | 1.12           | 1.33            | 21                        | 12                                       | 3UTR         |
| hsa-miR-11400 | NM_020128    | MDM1       | 913   | 964  | 1            | 1    | 0.52           | 0.16            | 19                        | 9                                        | 3UTR         |
| hsa-miR-11400 | NM_001278462 | MDM2       | 3498  | 3518 | 0.974359     | 1    | 1.19           | 0.47            | 20                        | 14                                       | 3UTR         |
| hsa-miR-11400 | NM_002392    | MDM2       | 4265  | 4285 | 0.974359     | 1    | 1.19           | 0.47            | 20                        | 14                                       | 3UTR         |
| hsa-miR-11400 | NM_001367990 | MDM2       | 4015  | 4035 | 0.974359     | 1    | 1.19           | 0.47            | 20                        | 14                                       | 3UTR         |
| hsa-miR-11400 | NM_001145339 | MDM2       | 4100  | 4120 | 0.974359     | 1    | 1.19           | 0.47            | 20                        | 14                                       | 3UTR         |
| hsa-miR-11400 | NM_001145340 | MDM2       | 3420  | 3440 | 0.974359     | 1    | 1.19           | 0.47            | 20                        | 14                                       | 3UTR         |
| hsa-miR-11400 | NM_001363578 | MEA1       | 968   | 988  | 1            | 1    | 2.44           | 1.29            | 20                        | 10                                       | 3UTR         |

| mirnaid       | refseqid     | genesymbol | start | end  | binding<br>p | seed | phylopste<br>m | phylopflan<br>k | binding_region_lengt<br>h | longest_<br>consecut<br>ive_pairi<br>ngs | positio<br>n |
|---------------|--------------|------------|-------|------|--------------|------|----------------|-----------------|---------------------------|------------------------------------------|--------------|
| hsa-miR-11400 | NM_133640    | MED22      | 2021  | 2045 | 0.961538     | 1    | 0.00           | 0.00            | 24                        | 13                                       | 3UTR         |
| hsa-miR-11400 | NM_133640    | MED22      | 2507  | 2525 | 1            | 1    | 0.00           | 0.00            | 18                        | 8                                        | 3UTR         |
| hsa-miR-11400 | NM_001319206 | MEF2A      | 2382  | 2409 | 1            | 1    | 4.20           | 2.63            | 27                        | 10                                       | 3UTR         |
| hsa-miR-11400 | NM_001365208 | MEF2A      | 2358  | 2385 | 1            | 1    | 4.20           | 2.63            | 27                        | 10                                       | 3UTR         |
| hsa-miR-11400 | NM_001130928 | MEF2A      | 1951  | 1978 | 1            | 1    | 4.20           | 2.63            | 27                        | 10                                       | 3UTR         |
| hsa-miR-11400 | XM_024446059 | MEF2C      | 1966  | 1981 | 1            | 1    | 0.00           | 0.00            | 15                        | 7                                        | 3UTR         |
| hsa-miR-11400 | NM_001364356 | MEF2C      | 3220  | 3238 | 1            | 1    | 4.23           | 3.81            | 18                        | 9                                        | 3UTR         |
| hsa-miR-11400 | NM_001131005 | MEF2C      | 3800  | 3818 | 1            | 1    | 2.62           | 2.68            | 18                        | 9                                        | 3UTR         |
| hsa-miR-11400 | NM_001193347 | MEF2C      | 3860  | 3878 | 1            | 1    | 1.02           | 2.25            | 18                        | 9                                        | 3UTR         |
| hsa-miR-11400 | NM_001198536 | MEFV       | 1864  | 1893 | 0.961538     | 1    | 0.00           | -0.16           | 23                        | 8                                        | 3UTR         |
| hsa-miR-11400 | NM_001282136 | MEI4       | 4827  | 4846 | 1            | 1    | -0.25          | -0.17           | 19                        | 7                                        | 3UTR         |
| hsa-miR-11400 | NM_001322247 | MEI4       | 4447  | 4466 | 1            | 1    | -0.25          | -0.17           | 19                        | 7                                        | 3UTR         |
| hsa-miR-11400 | NM_002398    | MEIS1      | 4330  | 4350 | 1            | 1    | -0.16          | 0.50            | 20                        | 10                                       | 3UTR         |
| hsa-miR-11400 | NM_002399    | MEIS2      | 1676  | 1698 | 1            | 1    | 7.59           | 6.58            | 22                        | 8                                        | 3UTR         |
| hsa-miR-11400 | NM_013999    | MEOX1      | 1217  | 1241 | 0.991453     | 1    | 0.10           | -0.01           | 24                        | 7                                        | 3UTR         |
| hsa-miR-11400 | NM_181725    | METTL2A    | 3162  | 3187 | 1            | 1    | -0.20          | -0.16           | 25                        | 8                                        | 3UTR         |
| hsa-miR-11400 | NM_001330662 | METTL6     | 1328  | 1377 | 0.974359     | 1    | 3.27           | 2.80            | 26                        | 8                                        | 3UTR         |

| mirnaid       | refseqid     | genesymbol | start | end   | binding<br>p | seed | phylopste<br>m | phylopflan<br>k | binding_region_lengt<br>h | longest_<br>consecut<br>ive_pairi<br>ngs | positio<br>n |
|---------------|--------------|------------|-------|-------|--------------|------|----------------|-----------------|---------------------------|------------------------------------------|--------------|
| hsa-miR-11400 | NM_001301790 | METTL6     | 1259  | 1282  | 1            | 1    | 0.40           | -0.12           | 23                        | 7                                        | 3UTR         |
| hsa-miR-11400 | NM_001301790 | METTL6     | 1373  | 1403  | 1            | 1    | -0.37          | -0.02           | 30                        | 9                                        | 3UTR         |
| hsa-miR-11400 | NM_152396    | METTL6     | 1394  | 1417  | 1            | 1    | 0.09           | -0.11           | 23                        | 7                                        | 3UTR         |
| hsa-miR-11400 | NM_014033    | METTL7A    | 2349  | 2369  | 1            | 1    | -0.29          | -0.08           | 20                        | 7                                        | 3UTR         |
| hsa-miR-11400 | NM_001009554 | MFAP3L     | 3528  | 3545  | 1            | 1    | 0.89           | 0.10            | 17                        | 10                                       | 3UTR         |
| hsa-miR-11400 | NM_001009554 | MFAP3L     | 4273  | 4294  | 1            | 1    | 1.22           | 0.93            | 21                        | 11                                       | 3UTR         |
| hsa-miR-11400 | NM_001242532 | MFSD11     | 1610  | 1631  | 1            | 1    | 0.00           | 0.00            | 21                        | 10                                       | 3UTR         |
| hsa-miR-11400 | NM_033055    | MFSD14A    | 1971  | 1994  | 1            | 1    | 1.43           | 2.30            | 23                        | 8                                        | 3UTR         |
| hsa-miR-11400 | NM_001355230 | MFSD14C    | 906   | 926   | 1            | 1    | 0.02           | -0.07           | 20                        | 7                                        | 3UTR         |
| hsa-miR-11400 | NM_032718    | MFSD9      | 2392  | 2414  | 1            | 1    | 0.08           | -0.19           | 22                        | 7                                        | 3UTR         |
| hsa-miR-11400 | NM_002406    | MGAT1      | 6778  | 6798  | 1            | 1    | 0.08           | 0.17            | 20                        | 7                                        | 3UTR         |
| hsa-miR-11400 | NM_001114617 | MGAT1      | 3496  | 3530  | 1            | 1    | 0.00           | 0.00            | 22                        | 16                                       | 3UTR         |
| hsa-miR-11400 | NM_001114617 | MGAT1      | 7178  | 7198  | 1            | 1    | 0.00           | 0.00            | 20                        | 7                                        | 3UTR         |
| hsa-miR-11400 | NM_001351286 | MGAT4C     | 8184  | 8207  | 1            | 1    | 0.16           | 0.05            | 23                        | 13                                       | 3UTR         |
| hsa-miR-11400 | NM_001351288 | MGAT4C     | 7797  | 7820  | 1            | 1    | 0.08           | -0.13           | 23                        | 13                                       | 3UTR         |
| hsa-miR-11400 | NM_001351288 | MGAT4C     | 16218 | 16235 | 1            | 1    | -0.26          | -0.13           | 17                        | 8                                        | 3UTR         |
| hsa-miR-11400 | NM_001351289 | MGAT4C     | 7893  | 7916  | 1            | 1    | 0.23           | 0.04            | 23                        | 13                                       | 3UTR         |



| mirnaid       | refseqid     | genesymbol | start | end   | binding<br>p | seed | phylopste<br>m | phylopflan<br>k | binding_region_lengt<br>h | longest_<br>consecut<br>ive_pairi<br>ngs | positio<br>n |
|---------------|--------------|------------|-------|-------|--------------|------|----------------|-----------------|---------------------------|------------------------------------------|--------------|
| hsa-miR-11400 | NM_001351289 | MGAT4C     | 16314 | 16331 | 1            | 1    | 0.54           | -0.03           | 17                        | 8                                        | 3UTR         |
| hsa-miR-11400 | NM_001351291 | MGAT4C     | 8917  | 8940  | 1            | 1    | 0.10           | 0.13            | 23                        | 13                                       | 3UTR         |
| hsa-miR-11400 | NM_001351291 | MGAT4C     | 17338 | 17355 | 1            | 1    | 0.00           | -0.04           | 17                        | 8                                        | 3UTR         |
| hsa-miR-11400 | NM_002410    | MGAT5      | 8248  | 8267  | 1            | 1    | 1.54           | 2.19            | 19                        | 14                                       | 3UTR         |
| hsa-miR-11400 | NM_001371457 | MGAT5      | 8415  | 8434  | 1            | 1    | 1.54           | 2.19            | 19                        | 14                                       | 3UTR         |
| hsa-miR-11400 | NM_001256585 | MGLL       | 3262  | 3287  | 0.953846     | 1    | 3.48           | 3.29            | 20                        | 8                                        | 3UTR         |
| hsa-miR-11400 | NM_007283    | MGLL       | 3352  | 3377  | 0.953846     | 1    | 4.14           | 2.58            | 20                        | 8                                        | 3UTR         |
| hsa-miR-11400 | NM_001003794 | MGLL       | 3247  | 3272  | 0.953846     | 1    | 4.10           | 3.28            | 20                        | 8                                        | 3UTR         |
| hsa-miR-11400 | XM_017005665 | MGLL       | 3442  | 3467  | 1            | 1    | 0.00           | 0.00            | 20                        | 8                                        | 3UTR         |
| hsa-miR-11400 | XM_024453334 | MGLL       | 3254  | 3279  | 1            | 1    | 0.00           | 0.00            | 20                        | 8                                        | 3UTR         |
| hsa-miR-11400 | NM_001363738 | MGME1      | 1227  | 1245  | 1            | 1    | -0.06          | 0.05            | 18                        | 10                                       | 3UTR         |
| hsa-miR-11400 | XM_017008212 | MGST2      | 1163  | 1181  | 1            | 1    | 0.00           | 0.00            | 18                        | 9                                        | 3UTR         |
| hsa-miR-11400 | NM_001204367 | MGST2      | 602   | 617   | 1            | 1    | 0.24           | 0.60            | 15                        | 14                                       | 3UTR         |
| hsa-miR-11400 | NM_001282667 | MICAL2     | 4510  | 4526  | 1            | 1    | -0.08          | 0.17            | 16                        | 15                                       | 3UTR         |
| hsa-miR-11400 | NM_033290    | MID1       | 5527  | 5546  | 1            | 1    | 4.37           | 5.34            | 19                        | 8                                        | 3UTR         |
| hsa-miR-11400 | NM_001347733 | MID1       | 5771  | 5790  | 1            | 1    | 5.59           | 4.97            | 19                        | 8                                        | 3UTR         |
| hsa-miR-11400 | NM_000381    | MID1       | 5693  | 5712  | 1            | 1    | 5.09           | 5.82            | 19                        | 8                                        | 3UTR         |

| mirnaid       | refseqid     | genesymbol | start | end  | binding<br>p | seed | phylopste<br>m | phylopflan<br>k | binding_region_lengt<br>h | longest_<br>consecut<br>ive_pairi<br>ngs | positio<br>n |
|---------------|--------------|------------|-------|------|--------------|------|----------------|-----------------|---------------------------|------------------------------------------|--------------|
| hsa-miR-11400 | XM_005268205 | MIDEAS     | 6542  | 6559 | 1            | 1    | 0.00           | 0.00            | 17                        | 13                                       | 3UTR         |
| hsa-miR-11400 | XM_011530237 | MIEF1      | 2907  | 2954 | 1            | 1    | 0.00           | 0.00            | 24                        | 9                                        | 3UTR         |
| hsa-miR-11400 | NM_019008    | MIEF1      | 2862  | 2909 | 1            | 1    | 0.00           | 0.00            | 24                        | 9                                        | 3UTR         |
| hsa-miR-11400 | NM_001144900 | MIEF2      | 2117  | 2179 | 1            | 1    | 0.00           | 0.00            | 31                        | 11                                       | 3UTR         |
| hsa-miR-11400 | NM_032339    | MIEN1      | 1228  | 1251 | 1            | 1    | 2.75           | 2.22            | 23                        | 8                                        | 3UTR         |
| hsa-miR-11400 | NM_001330206 | MIEN1      | 1307  | 1330 | 1            | 1    | 2.42           | 2.51            | 23                        | 8                                        | 3UTR         |
| hsa-miR-11400 | NM_001278215 | MIER1      | 739   | 749  | 1            | 1    | 0.11           | 0.12            | 10                        | 9                                        | 3UTR         |
| hsa-miR-11400 | NM_017550    | MIER2      | 2001  | 2020 | 1            | 1    | 1.39           | 2.26            | 19                        | 11                                       | 3UTR         |
| hsa-miR-11400 | NM_001297598 | MIER3      | 2553  | 2600 | 1            | 1    | 1.50           | 1.55            | 21                        | 14                                       | 3UTR         |
| hsa-miR-11400 | NM_001297599 | MIER3      | 2538  | 2585 | 1            | 1    | 3.96           | 1.44            | 21                        | 14                                       | 3UTR         |
| hsa-miR-11400 | NM_152622    | MIER3      | 2535  | 2582 | 1            | 1    | 3.43           | 1.61            | 21                        | 14                                       | 3UTR         |
| hsa-miR-11400 | NM_001351281 | MINDY4B    | 1570  | 1586 | 1            | 1    | 2.96           | 1.83            | 16                        | 6                                        | 3UTR         |
| hsa-miR-11400 | NM_012064    | MIP        | 2194  | 2228 | 1            | 1    | 4.56           | 3.02            | 17                        | 15                                       | 3UTR         |
| hsa-miR-11400 | XM_024446767 | MKLN1      | 3640  | 3659 | 1            | 1    | 0.00           | 0.00            | 19                        | 15                                       | 3UTR         |
| hsa-miR-11400 | NM_013255    | MKLN1      | 3416  | 3435 | 1            | 1    | -0.44          | 0.20            | 19                        | 15                                       | 3UTR         |
| hsa-miR-11400 | NM_005937    | MLLT6      | 4164  | 4184 | 1            | 1    | 2.02           | 0.51            | 20                        | 13                                       | 3UTR         |
| hsa-miR-11400 | NM_173470    | MMGT1      | 3371  | 3387 | 1            | 1    | -0.25          | 0.47            | 16                        | 15                                       | 3UTR         |

| mirnaid       | refseqid     | genesymbol | start | end   | binding<br>p | seed | phylopste<br>m | phylopflan<br>k | binding_region_lengt<br>h | longest_<br>consecut<br>ive_pairi<br>ngs | positio<br>n |
|---------------|--------------|------------|-------|-------|--------------|------|----------------|-----------------|---------------------------|------------------------------------------|--------------|
| hsa-miR-11400 | NM_018221    | MOB1A      | 1034  | 1053  | 1            | 1    | 0.28           | 0.37            | 19                        | 11                                       | 3UTR         |
| hsa-miR-11400 | NM_001244766 | MOB1B      | 2869  | 2888  | 1            | 1    | 0.00           | 0.00            | 19                        | 7                                        | 3UTR         |
| hsa-miR-11400 | NM_145279    | MOB3C      | 1616  | 1661  | 1            | 1    | -0.05          | 0.29            | 25                        | 9                                        | 3UTR         |
| hsa-miR-11400 | NM_201403    | MOB3C      | 1655  | 1679  | 1            | 1    | -0.01          | 0.21            | 24                        | 9                                        | 3UTR         |
| hsa-miR-11400 | NM_025098    | MOGAT2     | 1528  | 1550  | 1            | 1    | 0.13           | -0.03           | 22                        | 10                                       | 3UTR         |
| hsa-miR-11400 | XM_017019041 | MON2       | 10405 | 10424 | 1            | 1    | 0.00           | 0.00            | 19                        | 9                                        | 3UTR         |
| hsa-miR-11400 | NM_002436    | MPP1       | 1785  | 1801  | 1            | 1    | 2.93           | 2.30            | 16                        | 10                                       | 3UTR         |
| hsa-miR-11400 | NM_001166461 | MPP1       | 1725  | 1741  | 1            | 1    | 2.93           | 2.30            | 16                        | 10                                       | 3UTR         |
| hsa-miR-11400 | NM_001166462 | MPP1       | 1934  | 1950  | 1            | 1    | 2.89           | 2.25            | 16                        | 10                                       | 3UTR         |
| hsa-miR-11400 | NM_033066    | MPP4       | 2112  | 2133  | 1            | 1    | 2.80           | 2.29            | 21                        | 8                                        | 3UTR         |
| hsa-miR-11400 | XM_017004620 | MPP4       | 3638  | 3659  | 1            | 1    | 0.00           | 0.00            | 21                        | 8                                        | 3UTR         |
| hsa-miR-11400 | NM_001256550 | MPP5       | 4255  | 4276  | 1            | 1    | -0.18          | -0.13           | 21                        | 7                                        | 3UTR         |
| hsa-miR-11400 | NM_022474    | MPP5       | 4487  | 4508  | 1            | 1    | -0.18          | -0.13           | 21                        | 7                                        | 3UTR         |
| hsa-miR-11400 | NM_173496    | MPP7       | 4093  | 4112  | 1            | 1    | 4.04           | 3.68            | 19                        | 11                                       | 3UTR         |
| hsa-miR-11400 | NM_001145399 | MPPED2     | 1870  | 1893  | 1            | 1    | 0.48           | 0.04            | 23                        | 7                                        | 3UTR         |
| hsa-miR-11400 | NM_001145399 | MPPED2     | 2087  | 2125  | 1            | 1    | 0.18           | -0.01           | 24                        | 8                                        | 3UTR         |
| hsa-miR-11400 | NM_005797    | MPZL2      | 950   | 988   | 1            | 1    | 0.19           | 0.08            | 19                        | 10                                       | 3UTR         |

| mirnaid       | refseqid     | genesymbol | start | end  | binding<br>p | seed | phylopste<br>m | phylopflan<br>k | binding_region_lengt<br>h | longest_<br>consecut<br>ive_pairi<br>ngs | positio<br>n |
|---------------|--------------|------------|-------|------|--------------|------|----------------|-----------------|---------------------------|------------------------------------------|--------------|
| hsa-miR-11400 | NM_001385161 | MR1        | 6869  | 6886 | 1            | 1    | -0.05          | 0.08            | 17                        | 10                                       | 3UTR         |
| hsa-miR-11400 | NM_001385164 | MR1        | 6593  | 6610 | 1            | 1    | -0.05          | 0.08            | 17                        | 10                                       | 3UTR         |
| hsa-miR-11400 | NM_001531    | MR1        | 7043  | 7060 | 1            | 1    | -0.05          | 0.08            | 17                        | 10                                       | 3UTR         |
| hsa-miR-11400 | NM_001194999 | MR1        | 6908  | 6925 | 1            | 1    | -0.05          | 0.08            | 17                        | 10                                       | 3UTR         |
| hsa-miR-11400 | NM_001195000 | MR1        | 6767  | 6784 | 1            | 1    | -0.05          | 0.08            | 17                        | 10                                       | 3UTR         |
| hsa-miR-11400 | NM_001195035 | MR1        | 6662  | 6679 | 1            | 1    | -0.05          | 0.08            | 17                        | 10                                       | 3UTR         |
| hsa-miR-11400 | NM_138409    | MRAP2      | 838   | 861  | 1            | 1    | -0.19          | -0.07           | 23                        | 12                                       | 3UTR         |
| hsa-miR-11400 | NM_012219    | MRAS       | 3537  | 3566 | 0.961538     | 1    | -0.15          | -0.01           | 29                        | 11                                       | 3UTR         |
| hsa-miR-11400 | NM_001085049 | MRAS       | 3048  | 3077 | 0.961538     | 1    | -0.15          | -0.01           | 29                        | 11                                       | 3UTR         |
| hsa-miR-11400 | NM_001252091 | MRAS       | 3326  | 3355 | 0.961538     | 1    | -0.15          | -0.01           | 29                        | 11                                       | 3UTR         |
| hsa-miR-11400 | NM_001252090 | MRAS       | 3019  | 3048 | 1            | 1    | 0.00           | 0.00            | 29                        | 11                                       | 3UTR         |
| hsa-miR-11400 | NM_001252092 | MRAS       | 2831  | 2860 | 1            | 1    | 0.00           | 0.00            | 29                        | 11                                       | 3UTR         |
| hsa-miR-11400 | NM_001252093 | MRAS       | 2837  | 2866 | 1            | 1    | 0.00           | 0.00            | 29                        | 11                                       | 3UTR         |
| hsa-miR-11400 | NM_001039165 | MRGPRE     | 3406  | 3424 | 1            | 1    | 0.40           | -0.14           | 18                        | 12                                       | 3UTR         |
| hsa-miR-11400 | NM_145015    | MRGPRF     | 2045  | 2066 | 1            | 1    | 0.58           | -0.09           | 21                        | 10                                       | 3UTR         |
| hsa-miR-11400 | NM_001098515 | MRGPRF     | 2056  | 2077 | 1            | 1    | 0.40           | -0.07           | 21                        | 10                                       | 3UTR         |
| hsa-miR-11400 | NM_014175    | MRPL15     | 1331  | 1369 | 1            | 1    | -0.26          | -0.21           | 21                        | 8                                        | 3UTR         |

| mirnaid       | refseqid     | genesymbol | start | end   | binding<br>p | seed | phylopste<br>m | phylopflan<br>k | binding_region_lengt<br>h | longest_<br>consecut<br>ive_pairi<br>ngs | positio<br>n |
|---------------|--------------|------------|-------|-------|--------------|------|----------------|-----------------|---------------------------|------------------------------------------|--------------|
| hsa-miR-11400 | NM_145212    | MRPL30     | 1618  | 1633  | 1            | 1    | 0.84           | -0.15           | 15                        | 8                                        | 3UTR         |
| hsa-miR-11400 | NM_172177    | MRPL42     | 8460  | 8481  | 1            | 1    | -0.07          | 0.05            | 21                        | 14                                       | 3UTR         |
| hsa-miR-11400 | NM_172177    | MRPL42     | 8293  | 8314  | 1            | 1    | -0.14          | -0.05           | 21                        | 9                                        | 3UTR         |
| hsa-miR-11400 | NM_172177    | MRPL42     | 14669 | 14685 | 1            | 1    | 0.00           | 0.22            | 16                        | 15                                       | 3UTR         |
| hsa-miR-11400 | NM_014050    | MRPL42     | 8457  | 8478  | 1            | 1    | -0.07          | 0.05            | 21                        | 14                                       | 3UTR         |
| hsa-miR-11400 | NM_014050    | MRPL42     | 8290  | 8311  | 1            | 1    | -0.14          | -0.05           | 21                        | 9                                        | 3UTR         |
| hsa-miR-11400 | NM_014050    | MRPL42     | 14666 | 14682 | 1            | 1    | 0.00           | 0.22            | 16                        | 15                                       | 3UTR         |
| hsa-miR-11400 | NM_001193343 | MRPS18A    | 437   | 467   | 1            | 1    | 0.00           | -0.33           | 18                        | 12                                       | 3UTR         |
| hsa-miR-11400 | NM_053035    | MRPS33     | 1094  | 1113  | 1            | 1    | -0.18          | -0.06           | 19                        | 9                                        | 3UTR         |
| hsa-miR-11400 | NM_016071    | MRPS33     | 1181  | 1200  | 1            | 1    | -0.36          | 0.08            | 19                        | 9                                        | 3UTR         |
| hsa-miR-11400 | NM_138777    | MRRF       | 7183  | 7213  | 1            | 1    | -0.16          | -0.26           | 19                        | 11                                       | 3UTR         |
| hsa-miR-11400 | NM_199177    | MRRF       | 7023  | 7053  | 1            | 1    | -0.16          | -0.26           | 19                        | 11                                       | 3UTR         |
| hsa-miR-11400 | NM_001346343 | MRRF       | 7094  | 7124  | 1            | 1    | -0.16          | -0.26           | 19                        | 11                                       | 3UTR         |
| hsa-miR-11400 | NM_001173512 | MRRF       | 7027  | 7057  | 1            | 1    | 0.00           | 0.00            | 19                        | 11                                       | 3UTR         |
| hsa-miR-11400 | NM_001278242 | MS4A15     | 1235  | 1259  | 1            | 1    | -0.28          | -0.04           | 24                        | 11                                       | 3UTR         |
| hsa-miR-11400 | NM_152717    | MS4A15     | 1071  | 1095  | 1            | 1    | -0.28          | -0.04           | 24                        | 11                                       | 3UTR         |
| hsa-miR-11400 | NM_001098835 | MS4A15     | 1358  | 1382  | 1            | 1    | -0.28          | -0.04           | 24                        | 11                                       | 3UTR         |

| mirnaid       | refseqid     | genesymbol | start | end  | binding<br>p | seed | phylopste<br>m | phylopflan<br>k | binding_region_lengt<br>h | longest_<br>consecut<br>ive_pairi<br>ngs | positio<br>n |
|---------------|--------------|------------|-------|------|--------------|------|----------------|-----------------|---------------------------|------------------------------------------|--------------|
| hsa-miR-11400 | NM_001354471 | MS4A18     | 2038  | 2062 | 1            | 1    | -0.04          | 0.23            | 24                        | 10                                       | 3UTR         |
| hsa-miR-11400 | XM_005257014 | MSI2       | 4805  | 4823 | 1            | 1    | 0.00           | 0.00            | 18                        | 9                                        | 3UTR         |
| hsa-miR-11400 | NM_138715    | MSR1       | 2710  | 2727 | 1            | 1    | 2.19           | 1.38            | 17                        | 8                                        | 3UTR         |
| hsa-miR-11400 | NM_138716    | MSR1       | 2514  | 2538 | 1            | 1    | 1.70           | 1.55            | 18                        | 8                                        | 3UTR         |
| hsa-miR-11400 | NM_002445    | MSR1       | 2008  | 2031 | 1            | 1    | 2.61           | 1.79            | 23                        | 9                                        | 3UTR         |
| hsa-miR-11400 | NM_001363744 | MSR1       | 2770  | 2787 | 1            | 1    | 2.89           | 2.31            | 17                        | 8                                        | 3UTR         |
| hsa-miR-11400 | NM_005259    | MSTN       | 1750  | 1767 | 0.961538     | 1    | 4.11           | 2.82            | 17                        | 9                                        | 3UTR         |
| hsa-miR-11400 | NM_005259    | MSTN       | 1352  | 1374 | 1            | 1    | 4.69           | 4.07            | 22                        | 6                                        | 3UTR         |
| hsa-miR-11400 | NM_001282755 | MTA3       | 3975  | 3993 | 1            | 1    | -0.16          | -0.20           | 18                        | 9                                        | 3UTR         |
| hsa-miR-11400 | XM_017004562 | MTA3       | 2471  | 2492 | 1            | 1    | 0.00           | 0.00            | 21                        | 15                                       | 3UTR         |
| hsa-miR-11400 | NM_178812    | MTDH       | 4084  | 4104 | 0.980769     | 1    | 0.25           | 0.17            | 20                        | 14                                       | 3UTR         |
| hsa-miR-11400 | NM_001363138 | MTDH       | 3985  | 4005 | 0.980769     | 1    | 0.25           | 0.17            | 20                        | 14                                       | 3UTR         |
| hsa-miR-11400 | NM_005955    | MTF1       | 2417  | 2438 | 1            | 1    | 0.30           | 0.47            | 21                        | 8                                        | 3UTR         |
| hsa-miR-11400 | XM_011523285 | MTHFSD     | 1452  | 1470 | 1            | 1    | 0.00           | 0.00            | 18                        | 9                                        | 3UTR         |
| hsa-miR-11400 | NM_022764    | MTHFSD     | 1411  | 1429 | 1            | 1    | 0.03           | -0.70           | 18                        | 9                                        | 3UTR         |
| hsa-miR-11400 | NM_001159377 | MTHFSD     | 1414  | 1432 | 1            | 1    | 0.03           | -0.71           | 18                        | 9                                        | 3UTR         |
| hsa-miR-11400 | NM_001159378 | MTHFSD     | 1414  | 1432 | 1            | 1    | 0.03           | -0.71           | 18                        | 9                                        | 3UTR         |

| mirnaid       | refseqid     | genesymbol | start | end  | binding<br>p | seed | phylopste<br>m | phylopflan<br>k | binding_region_lengt<br>h | longest_<br>consecut<br>ive_pairi<br>ngs | positio<br>n |
|---------------|--------------|------------|-------|------|--------------|------|----------------|-----------------|---------------------------|------------------------------------------|--------------|
| hsa-miR-11400 | NM_001159379 | MTHFSD     | 1411  | 1429 | 1            | 1    | 0.03           | -0.70           | 18                        | 9                                        | 3UTR         |
| hsa-miR-11400 | XM_011532871 | MTIF2      | 3216  | 3241 | 1            | 1    | 0.00           | 0.00            | 25                        | 10                                       | 3UTR         |
| hsa-miR-11400 | NM_017762    | MTMR10     | 4616  | 4642 | 1            | 1    | 0.00           | 0.00            | 26                        | 7                                        | 3UTR         |
| hsa-miR-11400 | NM_001294343 | MTMR12     | 2217  | 2236 | 1            | 1    | -0.14          | -0.14           | 19                        | 8                                        | 3UTR         |
| hsa-miR-11400 | NM_015458    | MTMR9      | 2570  | 2606 | 1            | 1    | 0.50           | 0.92            | 19                        | 13                                       | 3UTR         |
| hsa-miR-11400 | NM_133645    | MTO1       | 3216  | 3238 | 1            | 1    | -0.11          | -0.06           | 22                        | 8                                        | 3UTR         |
| hsa-miR-11400 | NM_012123    | MTO1       | 3141  | 3163 | 1            | 1    | -0.11          | -0.06           | 22                        | 8                                        | 3UTR         |
| hsa-miR-11400 | NM_001123226 | MTO1       | 3261  | 3283 | 1            | 1    | -0.11          | -0.06           | 22                        | 8                                        | 3UTR         |
| hsa-miR-11400 | XM_011544194 | MTR        | 8453  | 8474 | 1            | 1    | 0.00           | 0.00            | 21                        | 8                                        | 3UTR         |
| hsa-miR-11400 | NM_015360    | MTREX      | 3702  | 3718 | 1            | 1    | 2.39           | 1.51            | 16                        | 15                                       | 3UTR         |
| hsa-miR-11400 | NM_001190708 | MTRNR2L10  | 945   | 964  | 1            | 1    | -1.88          | 1.23            | 19                        | 9                                        | 3UTR         |
| hsa-miR-11400 | NM_001190472 | MTRNR2L3   | 951   | 970  | 1            | 1    | 0.22           | 0.84            | 19                        | 9                                        | 3UTR         |
| hsa-miR-11400 | NM_001190476 | MTRNR2L4   | 1585  | 1604 | 1            | 1    | -0.10          | 0.02            | 19                        | 9                                        | 3UTR         |
| hsa-miR-11400 | NM_001166393 | MTUS1      | 1948  | 1979 | 1            | 1    | 0.55           | 0.33            | 31                        | 8                                        | 3UTR         |
| hsa-miR-11400 | NM_001135091 | MUC15      | 1809  | 1838 | 1            | 1    | 0.00           | 0.00            | 15                        | 13                                       | 3UTR         |
| hsa-miR-11400 | NM_001135092 | MUC15      | 1659  | 1688 | 1            | 1    | 0.00           | 0.00            | 15                        | 13                                       | 3UTR         |
| hsa-miR-11400 | NM_138297    | MUC4       | 3657  | 3678 | 1            | 1    | 1.18           | 0.44            | 21                        | 15                                       | 3UTR         |

| mirnaid       | refseqid     | genesymbol | start | end  | binding<br>p | seed | phylopste<br>m | phylopflan<br>k | binding_region_lengt<br>h | longest_<br>consecut<br>ive_pairi<br>ngs | positio<br>n |
|---------------|--------------|------------|-------|------|--------------|------|----------------|-----------------|---------------------------|------------------------------------------|--------------|
| hsa-miR-11400 | NM_001202514 | MXD1       | 3614  | 3638 | 1            | 1    | 0.00           | 0.00            | 24                        | 11                                       | 3UTR         |
| hsa-miR-11400 | NM_001020819 | MYADM      | 2645  | 2667 | 1            | 1    | -0.02          | -0.01           | 22                        | 6                                        | 3UTR         |
| hsa-miR-11400 | NM_025107    | MYCT1      | 1336  | 1357 | 0.953846     | 1    | -0.22          | -0.02           | 21                        | 12                                       | 3UTR         |
| hsa-miR-11400 | NM_001371626 | MYCT1      | 776   | 797  | 0.953846     | 1    | -0.22          | -0.02           | 21                        | 12                                       | 3UTR         |
| hsa-miR-11400 | NM_014981    | MYH15      | 6985  | 7004 | 1            | 1    | -0.04          | 0.70            | 19                        | 10                                       | 3UTR         |
| hsa-miR-11400 | XM_024450768 | MYO1C      | 4247  | 4266 | 1            | 1    | 0.00           | 0.00            | 19                        | 10                                       | 3UTR         |
| hsa-miR-11400 | XM_024450769 | MYO1C      | 4041  | 4060 | 1            | 1    | 0.00           | 0.00            | 19                        | 10                                       | 3UTR         |
| hsa-miR-11400 | NM_004998    | MYO1E      | 4918  | 4939 | 1            | 1    | -0.27          | 2.49            | 21                        | 10                                       | 3UTR         |
| hsa-miR-11400 | NM_006901    | MYO9A      | 9486  | 9505 | 1            | 1    | 0.81           | 2.88            | 19                        | 8                                        | 3UTR         |
| hsa-miR-11400 | NM_153604    | MYOCD      | 3519  | 3536 | 1            | 1    | -0.01          | 0.04            | 17                        | 8                                        | 3UTR         |
| hsa-miR-11400 | NM_001146312 | MYOCD      | 3663  | 3680 | 1            | 1    | -0.01          | 0.04            | 17                        | 8                                        | 3UTR         |
| hsa-miR-11400 | NM_001122853 | MYOZ3      | 1348  | 1367 | 1            | 1    | -0.07          | -0.15           | 19                        | 10                                       | 3UTR         |
| hsa-miR-11400 | NM_001012643 | MYPOP      | 1726  | 1746 | 1            | 1    | 2.65           | 2.13            | 20                        | 14                                       | 3UTR         |
| hsa-miR-11400 | NM_052818    | N4BP2L1    | 1677  | 1699 | 1            | 1    | 0.00           | 0.33            | 22                        | 14                                       | 3UTR         |
| hsa-miR-11400 | NM_001353632 | N4BP2L1    | 1783  | 1805 | 1            | 1    | -0.01          | 0.30            | 22                        | 14                                       | 3UTR         |
| hsa-miR-11400 | NM_001079691 | N4BP2L1    | 1669  | 1691 | 1            | 1    | 0.26           | 0.26            | 22                        | 14                                       | 3UTR         |
| hsa-miR-11400 | NM_014887    | N4BP2L2    | 7339  | 7358 | 1            | 1    | 2.60           | 1.46            | 19                        | 13                                       | 3UTR         |



| mirnaid       | refseqid     | genesymbol | start | end   | binding<br>p | seed | phylopste<br>m | phylopflan<br>k | binding_region_lengt<br>h | longest_<br>consecut<br>ive_pairi<br>ngs | positio<br>n |
|---------------|--------------|------------|-------|-------|--------------|------|----------------|-----------------|---------------------------|------------------------------------------|--------------|
| hsa-miR-11400 | NM_057175    | NAA15      | 4142  | 4184  | 1            | 1    | 2.55           | 2.78            | 20                        | 15                                       | 3UTR         |
| hsa-miR-11400 | NM_057175    | NAA15      | 4840  | 4854  | 1            | 1    | 2.96           | 1.32            | 14                        | 13                                       | 3UTR         |
| hsa-miR-11400 | XM_005263236 | NAA15      | 4145  | 4187  | 1            | 1    | 0.00           | 0.00            | 20                        | 15                                       | 3UTR         |
| hsa-miR-11400 | XM_005263236 | NAA15      | 4843  | 4857  | 1            | 1    | 0.00           | 0.00            | 14                        | 13                                       | 3UTR         |
| hsa-miR-11400 | NM_207015    | NAALADL2   | 5076  | 5094  | 1            | 1    | -0.63          | -0.03           | 18                        | 7                                        | 3UTR         |
| hsa-miR-11400 | NM_001031716 | NABP1      | 2055  | 2073  | 1            | 1    | 1.13           | 0.46            | 18                        | 8                                        | 3UTR         |
| hsa-miR-11400 | NM_004537    | NAP1L1     | 11569 | 11585 | 1            | 1    | 3.12           | 2.47            | 16                        | 6                                        | 3UTR         |
| hsa-miR-11400 | NM_004537    | NAP1L1     | 8221  | 8244  | 1            | 1    | 0.68           | 0.37            | 23                        | 8                                        | 3UTR         |
| hsa-miR-11400 | NM_020443    | NAV1       | 11654 | 11674 | 1            | 1    | 0.17           | 0.06            | 20                        | 8                                        | 3UTR         |
| hsa-miR-11400 | NM_001167738 | NAV1       | 10249 | 10269 | 1            | 1    | 0.17           | 0.06            | 20                        | 8                                        | 3UTR         |
| hsa-miR-11400 | NM_145117    | NAV2       | 8558  | 8591  | 1            | 1    | -0.23          | 0.62            | 20                        | 9                                        | 3UTR         |
| hsa-miR-11400 | NM_182964    | NAV2       | 8567  | 8600  | 1            | 1    | -0.23          | 0.62            | 20                        | 9                                        | 3UTR         |
| hsa-miR-11400 | XM_011520444 | NAV2       | 8723  | 8756  | 1            | 1    | 0.00           | 0.00            | 20                        | 9                                        | 3UTR         |
| hsa-miR-11400 | NM_001111018 | NAV2       | 8163  | 8196  | 1            | 1    | -0.23          | 0.62            | 20                        | 9                                        | 3UTR         |
| hsa-miR-11400 | NM_001111019 | NAV2       | 5148  | 5181  | 1            | 1    | -0.23          | 0.62            | 20                        | 9                                        | 3UTR         |
| hsa-miR-11400 | NM_001244963 | NAV2       | 8735  | 8768  | 1            | 1    | 0.00           | 0.00            | 20                        | 9                                        | 3UTR         |
| hsa-miR-11400 | NM_001291571 | NBR1       | 3014  | 3034  | 1            | 1    | -0.49          | -0.16           | 20                        | 7                                        | 3UTR         |

| mirnaid       | refseqid     | genesymbol | start | end   | binding<br>p | seed | phylopste<br>m | phylopflan<br>k | binding_region_lengt<br>h | longest_<br>consecut<br>ive_pairi<br>ngs | positio<br>n |
|---------------|--------------|------------|-------|-------|--------------|------|----------------|-----------------|---------------------------|------------------------------------------|--------------|
| hsa-miR-11400 | NM_002486    | NCBP1      | 4220  | 4241  | 1            | 1    | -0.48          | -0.01           | 21                        | 12                                       | 3UTR         |
| hsa-miR-11400 | XM_011512556 | NCBP2      | 3370  | 3386  | 1            | 1    | 0.00           | 0.00            | 16                        | 15                                       | 3UTR         |
| hsa-miR-11400 | XM_011512557 | NCBP2      | 3484  | 3500  | 1            | 1    | 0.00           | 0.00            | 16                        | 15                                       | 3UTR         |
| hsa-miR-11400 | XM_011512558 | NCBP2      | 3409  | 3425  | 1            | 1    | 0.00           | 0.00            | 16                        | 15                                       | 3UTR         |
| hsa-miR-11400 | NM_001355243 | NCBP2AS2   | 592   | 619   | 1            | 1    | 0.32           | -0.21           | 22                        | 8                                        | 3UTR         |
| hsa-miR-11400 | NM_013416    | NCF4       | 1245  | 1264  | 1            | 1    | 3.86           | 2.53            | 19                        | 8                                        | 3UTR         |
| hsa-miR-11400 | NM_205842    | NCKAP1     | 13200 | 13224 | 1            | 1    | 0.27           | 0.18            | 24                        | 9                                        | 3UTR         |
| hsa-miR-11400 | NM_013436    | NCKAP1     | 13182 | 13206 | 1            | 1    | 0.27           | 0.12            | 24                        | 9                                        | 3UTR         |
| hsa-miR-11400 | NM_005337    | NCKAP1L    | 5206  | 5240  | 1            | 1    | -0.01          | 0.22            | 34                        | 9                                        | 3UTR         |
| hsa-miR-11400 | NM_005337    | NCKAP1L    | 7857  | 7877  | 1            | 1    | -0.02          | 0.26            | 20                        | 7                                        | 3UTR         |
| hsa-miR-11400 | NM_001184976 | NCKAP1L    | 5124  | 5158  | 1            | 1    | -0.01          | 0.22            | 34                        | 9                                        | 3UTR         |
| hsa-miR-11400 | NM_001184976 | NCKAP1L    | 7775  | 7795  | 1            | 1    | -0.02          | 0.26            | 20                        | 7                                        | 3UTR         |
| hsa-miR-11400 | XM_005264625 | NCOA1      | 4896  | 4912  | 1            | 1    | 0.00           | 0.00            | 16                        | 15                                       | 3UTR         |
| hsa-miR-11400 | NM_181659    | NCOA3      | 7513  | 7537  | 1            | 1    | -0.57          | -0.07           | 24                        | 8                                        | 3UTR         |
| hsa-miR-11400 | NM_006534    | NCOA3      | 7501  | 7525  | 1            | 1    | -0.57          | -0.07           | 24                        | 8                                        | 3UTR         |
| hsa-miR-11400 | NM_001174088 | NCOA3      | 7486  | 7510  | 1            | 1    | -0.57          | -0.07           | 24                        | 8                                        | 3UTR         |
| hsa-miR-11400 | NM_001202439 | NCR3LG1    | 4874  | 4894  | 1            | 1    | 0.00           | 0.00            | 20                        | 10                                       | 3UTR         |

| mirnaid       | refseqid     | genesymbol | start | end  | binding<br>p | seed | phylopste<br>m | phylopflan<br>k | binding_region_lengt<br>h | longest_<br>consecut<br>ive_pairi<br>ngs | positio<br>n |
|---------------|--------------|------------|-------|------|--------------|------|----------------|-----------------|---------------------------|------------------------------------------|--------------|
| hsa-miR-11400 | NM_001128826 | NCS1       | 2178  | 2196 | 1            | 1    | -0.55          | -0.23           | 18                        | 11                                       | 3UTR         |
| hsa-miR-11400 | NM_032013    | NDRG3      | 2828  | 2847 | 1            | 1    | 3.79           | 2.67            | 19                        | 9                                        | 3UTR         |
| hsa-miR-11400 | XM_006723837 | NDRG3      | 2755  | 2770 | 1            | 1    | 0.00           | 0.00            | 15                        | 7                                        | 3UTR         |
| hsa-miR-11400 | XM_006723837 | NDRG3      | 2858  | 2877 | 1            | 1    | 0.00           | 0.00            | 19                        | 9                                        | 3UTR         |
| hsa-miR-11400 | XM_011528928 | NDRG3      | 2574  | 2589 | 1            | 1    | 0.00           | 0.00            | 15                        | 7                                        | 3UTR         |
| hsa-miR-11400 | XM_011528928 | NDRG3      | 2677  | 2696 | 1            | 1    | 0.00           | 0.00            | 19                        | 9                                        | 3UTR         |
| hsa-miR-11400 | NM_001242833 | NDRG4      | 1574  | 1609 | 1            | 1    | 3.12           | 3.20            | 22                        | 11                                       | 3UTR         |
| hsa-miR-11400 | NM_004784    | NDST3      | 3774  | 3791 | 1            | 1    | 0.44           | 0.07            | 17                        | 9                                        | 3UTR         |
| hsa-miR-11400 | NM_002490    | NDUFA6     | 956   | 974  | 1            | 1    | 0.00           | 0.00            | 18                        | 13                                       | 3UTR         |
| hsa-miR-11400 | NM_005002    | NDUFA9     | 4675  | 4700 | 1            | 1    | -0.23          | -0.02           | 25                        | 8                                        | 3UTR         |
| hsa-miR-11400 | NM_005002    | NDUFA9     | 2909  | 2928 | 1            | 1    | 0.71           | -0.01           | 19                        | 15                                       | 3UTR         |
| hsa-miR-11400 | NM_001199983 | NDUFS1     | 4846  | 4870 | 1            | 1    | 0.15           | 0.06            | 24                        | 11                                       | 3UTR         |
| hsa-miR-11400 | NM_001199984 | NDUFS1     | 4948  | 4972 | 1            | 1    | 0.42           | 0.43            | 24                        | 11                                       | 3UTR         |
| hsa-miR-11400 | NM_213569    | NEBL       | 3876  | 3898 | 1            | 1    | 0.53           | 0.11            | 22                        | 9                                        | 3UTR         |
| hsa-miR-11400 | NM_001377327 | NEBL       | 3840  | 3862 | 1            | 1    | -0.48          | 0.37            | 22                        | 9                                        | 3UTR         |
| hsa-miR-11400 | NM_001377328 | NEBL       | 3545  | 3567 | 1            | 1    | 0.23           | 0.41            | 22                        | 9                                        | 3UTR         |
| hsa-miR-11400 | NM_022351    | NECAB1     | 3980  | 3998 | 1            | 1    | 0.17           | 0.36            | 18                        | 8                                        | 3UTR         |

| mirnaid       | refseqid     | genesymbol | start | end  | binding<br>p | seed | phylopste<br>m | phylopflan<br>k | binding_region_lengt<br>h | longest_<br>consecut<br>ive_pairi<br>ngs | positio<br>n |
|---------------|--------------|------------|-------|------|--------------|------|----------------|-----------------|---------------------------|------------------------------------------|--------------|
| hsa-miR-11400 | NM_001135747 | NEIL2      | 1456  | 1475 | 1            | 1    | -0.26          | -0.20           | 19                        | 10                                       | 3UTR         |
| hsa-miR-11400 | NM_003157    | NEK4       | 3040  | 3063 | 1            | 1    | 0.60           | 0.60            | 23                        | 8                                        | 3UTR         |
| hsa-miR-11400 | NM_001193533 | NEK4       | 2773  | 2796 | 1            | 1    | 0.50           | 0.36            | 23                        | 8                                        | 3UTR         |
| hsa-miR-11400 | NM_001365552 | NEK5       | 3339  | 3374 | 0.961538     | 1    | 0.52           | -0.01           | 21                        | 12                                       | 3UTR         |
| hsa-miR-11400 | NM_001365552 | NEK5       | 2953  | 2972 | 1            | 1    | -0.40          | -0.35           | 19                        | 10                                       | 3UTR         |
| hsa-miR-11400 | NM_015257    | NEMP1      | 4835  | 4852 | 1            | 1    | 2.58           | 3.46            | 17                        | 8                                        | 3UTR         |
| hsa-miR-11400 | NM_001130963 | NEMP1      | 5054  | 5071 | 1            | 1    | 1.99           | 3.55            | 17                        | 8                                        | 3UTR         |
| hsa-miR-11400 | NM_002499    | NEO1       | 6493  | 6513 | 1            | 1    | -0.41          | 0.01            | 20                        | 15                                       | 3UTR         |
| hsa-miR-11400 | NM_001172623 | NEO1       | 6313  | 6333 | 1            | 1    | -0.41          | 0.01            | 20                        | 15                                       | 3UTR         |
| hsa-miR-11400 | NM_001172624 | NEO1       | 6439  | 6459 | 1            | 1    | -0.41          | 0.01            | 20                        | 15                                       | 3UTR         |
| hsa-miR-11400 | XM_017023740 | NETO2      | 1744  | 1755 | 1            | 1    | 0.00           | 0.00            | 11                        | 10                                       | 3UTR         |
| hsa-miR-11400 | NM_000434    | NEU1       | 1306  | 1324 | 1            | 1    | -0.13          | -0.34           | 18                        | 11                                       | 3UTR         |
| hsa-miR-11400 | NM_001308177 | NEURL1B    | 3582  | 3603 | 1            | 1    | -0.15          | 0.20            | 21                        | 11                                       | 3UTR         |
| hsa-miR-11400 | NM_001308178 | NEURL1B    | 3408  | 3429 | 1            | 1    | -0.15          | 0.20            | 21                        | 11                                       | 3UTR         |
| hsa-miR-11400 | NM_001142651 | NEURL1B    | 4128  | 4149 | 1            | 1    | -0.15          | 0.20            | 21                        | 11                                       | 3UTR         |
| hsa-miR-11400 | NM_001285485 | NEURL3     | 908   | 939  | 1            | 1    | 3.05           | 2.71            | 25                        | 8                                        | 3UTR         |
| hsa-miR-11400 | NM_001285486 | NEURL3     | 1172  | 1203 | 1            | 1    | 4.63           | 2.74            | 25                        | 8                                        | 3UTR         |

| mirnaid       | refseqid     | genesymbol | start | end   | binding<br>p | seed | phylopste<br>m | phylopflan<br>k | binding_region_lengt<br>h | longest_<br>consecut<br>ive_pairi<br>ngs | positio<br>n |
|---------------|--------------|------------|-------|-------|--------------|------|----------------|-----------------|---------------------------|------------------------------------------|--------------|
| hsa-miR-11400 | NM_144573    | NEXN       | 3059  | 3091  | 1            | 1    | 0.04           | 0.15            | 32                        | 10                                       | 3UTR         |
| hsa-miR-11400 | NM_000267    | NF1        | 11672 | 11690 | 1            | 1    | -0.19          | -0.15           | 18                        | 14                                       | 3UTR         |
| hsa-miR-11400 | NM_001042492 | NF1        | 11685 | 11703 | 1            | 1    | -0.19          | -0.15           | 18                        | 14                                       | 3UTR         |
| hsa-miR-11400 | NM_173163    | NFATC3     | 6011  | 6032  | 1            | 1    | 0.50           | 0.46            | 21                        | 10                                       | 3UTR         |
| hsa-miR-11400 | NM_173165    | NFATC3     | 5922  | 5943  | 1            | 1    | 0.50           | 0.46            | 21                        | 10                                       | 3UTR         |
| hsa-miR-11400 | NM_004555    | NFATC3     | 6026  | 6047  | 1            | 1    | 0.50           | 0.46            | 21                        | 10                                       | 3UTR         |
| hsa-miR-11400 | NM_001369476 | NFIB       | 1670  | 1687  | 0.969231     | 1    | 1.89           | 2.92            | 17                        | 11                                       | 3UTR         |
| hsa-miR-11400 | NM_001282787 | NFIB       | 5693  | 5715  | 0.974359     | 1    | 3.44           | 2.10            | 22                        | 9                                        | 3UTR         |
| hsa-miR-11400 | NM_001369460 | NFIB       | 2546  | 2586  | 1            | 1    | 4.08           | 3.80            | 40                        | 9                                        | 3UTR         |
| hsa-miR-11400 | NM_001369464 | NFIB       | 2510  | 2550  | 1            | 1    | 3.44           | 4.54            | 40                        | 9                                        | 3UTR         |
| hsa-miR-11400 | NM_001369466 | NFIB       | 2297  | 2337  | 1            | 1    | 4.13           | 4.86            | 40                        | 9                                        | 3UTR         |
| hsa-miR-11400 | NM_001369470 | NFIB       | 2232  | 2272  | 1            | 1    | 3.95           | 4.89            | 40                        | 9                                        | 3UTR         |
| hsa-miR-11400 | NM_001190738 | NFIB       | 2221  | 2261  | 1            | 1    | 3.62           | 4.67            | 40                        | 9                                        | 3UTR         |
| hsa-miR-11400 | NM_001378599 | NFILZ      | 4664  | 4682  | 0.974359     | 1    | 0.46           | 0.11            | 18                        | 7                                        | 3UTR         |
| hsa-miR-11400 | NM_001378600 | NFILZ      | 4500  | 4518  | 0.974359     | 1    | 0.46           | 0.11            | 18                        | 7                                        | 3UTR         |
| hsa-miR-11400 | NM_001378601 | NFILZ      | 4095  | 4113  | 0.974359     | 1    | 0.46           | 0.11            | 18                        | 7                                        | 3UTR         |
| hsa-miR-11400 | NM_001271043 | NFIX       | 4071  | 4094  | 1            | 1    | 1.37           | 1.83            | 23                        | 11                                       | 3UTR         |

| mirnaid       | refseqid     | genesymbol | start | end  | binding<br>p | seed | phylopste<br>m | phylopflan<br>k | binding_region_lengt<br>h | longest_<br>consecut<br>ive_pairi<br>ngs | positio<br>n |
|---------------|--------------|------------|-------|------|--------------|------|----------------|-----------------|---------------------------|------------------------------------------|--------------|
| hsa-miR-11400 | NM_001271044 | NFIX       | 3882  | 3905 | 1            | 1    | 1.37           | 1.83            | 23                        | 11                                       | 3UTR         |
| hsa-miR-11400 | XM_006722760 | NFIX       | 3915  | 3938 | 1            | 1    | 0.00           | 0.00            | 23                        | 11                                       | 3UTR         |
| hsa-miR-11400 | NM_002501    | NFIX       | 4209  | 4232 | 1            | 1    | 1.37           | 1.83            | 23                        | 11                                       | 3UTR         |
| hsa-miR-11400 | NM_001365902 | NFIX       | 4357  | 4380 | 1            | 1    | 1.37           | 1.83            | 23                        | 11                                       | 3UTR         |
| hsa-miR-11400 | NM_001365984 | NFIX       | 4209  | 4232 | 1            | 1    | 1.37           | 1.83            | 23                        | 11                                       | 3UTR         |
| hsa-miR-11400 | NM_001365985 | NFIX       | 4061  | 4084 | 1            | 1    | 1.37           | 1.83            | 23                        | 11                                       | 3UTR         |
| hsa-miR-11400 | NM_001378404 | NFIX       | 4030  | 4053 | 1            | 1    | 1.37           | 1.83            | 23                        | 11                                       | 3UTR         |
| hsa-miR-11400 | NM_006165    | NFRKB      | 5108  | 5129 | 1            | 1    | 0.00           | 0.00            | 21                        | 10                                       | 3UTR         |
| hsa-miR-11400 | NM_006165    | NFRKB      | 4900  | 4930 | 1            | 1    | 0.73           | 2.12            | 30                        | 9                                        | 3UTR         |
| hsa-miR-11400 | NM_001143835 | NFRKB      | 5096  | 5117 | 1            | 1    | -0.15          | 0.20            | 21                        | 10                                       | 3UTR         |
| hsa-miR-11400 | NM_021705    | NFYA       | 2789  | 2809 | 1            | 1    | 0.47           | 0.27            | 20                        | 11                                       | 3UTR         |
| hsa-miR-11400 | NM_002505    | NFYA       | 2876  | 2896 | 1            | 1    | 0.47           | 0.27            | 20                        | 11                                       | 3UTR         |
| hsa-miR-11400 | NM_001114090 | NGEF       | 2449  | 2496 | 1            | 1    | 1.88           | 2.16            | 47                        | 8                                        | 3UTR         |
| hsa-miR-11400 | NM_024782    | NHEJ1      | 5611  | 5650 | 1            | 1    | 0.39           | -0.12           | 17                        | 8                                        | 3UTR         |
| hsa-miR-11400 | NM_001377498 | NHEJ1      | 5561  | 5600 | 1            | 1    | 0.59           | -0.13           | 17                        | 8                                        | 3UTR         |
| hsa-miR-11400 | NM_001144060 | NHSL1      | 5843  | 5894 | 1            | 1    | 1.99           | 1.25            | 51                        | 10                                       | 3UTR         |
| hsa-miR-11400 | XM_017029476 | NHSL2      | 9369  | 9390 | 1            | 1    | 0.00           | 0.00            | 21                        | 9                                        | 3UTR         |

| mirnaid       | refseqid     | genesymbol | start | end  | binding<br>p | seed | phylopste<br>m | phylopflan<br>k | binding_region_lengt<br>h | longest_<br>consecut<br>ive_pairi<br>ngs | positio<br>n |
|---------------|--------------|------------|-------|------|--------------|------|----------------|-----------------|---------------------------|------------------------------------------|--------------|
| hsa-miR-11400 | NM_001322865 | NIPAL3     | 1204  | 1225 | 1            | 1    | -0.42          | -0.29           | 21                        | 9                                        | 3UTR         |
| hsa-miR-11400 | NM_001099287 | NIPAL4     | 2103  | 2118 | 1            | 1    | 0.29           | -0.05           | 15                        | 7                                        | 3UTR         |
| hsa-miR-11400 | NM_001172292 | NIPAL4     | 2240  | 2255 | 1            | 1    | 0.29           | -0.05           | 15                        | 7                                        | 3UTR         |
| hsa-miR-11400 | NM_020202    | NIT2       | 6317  | 6336 | 1            | 1    | -0.26          | 0.25            | 19                        | 11                                       | 3UTR         |
| hsa-miR-11400 | NM_152864    | NKAIN4     | 928   | 946  | 1            | 1    | 1.63           | 1.61            | 18                        | 17                                       | 3UTR         |
| hsa-miR-11400 | NM_198478    | NKPD1      | 2916  | 2938 | 1            | 1    | 0.69           | 0.40            | 22                        | 13                                       | 3UTR         |
| hsa-miR-11400 | NM_181303    | NLGN3      | 3104  | 3154 | 1            | 1    | 0.77           | 1.22            | 50                        | 8                                        | 3UTR         |
| hsa-miR-11400 | NM_181303    | NLGN3      | 2876  | 2892 | 1            | 1    | 2.14           | 2.87            | 16                        | 12                                       | 3UTR         |
| hsa-miR-11400 | NM_018977    | NLGN3      | 3044  | 3094 | 1            | 1    | 0.77           | 1.22            | 50                        | 8                                        | 3UTR         |
| hsa-miR-11400 | NM_018977    | NLGN3      | 2816  | 2832 | 1            | 1    | 2.14           | 2.87            | 16                        | 12                                       | 3UTR         |
| hsa-miR-11400 | NM_001321276 | NLGN3      | 2531  | 2581 | 1            | 1    | 0.77           | 1.22            | 50                        | 8                                        | 3UTR         |
| hsa-miR-11400 | NM_001321276 | NLGN3      | 2303  | 2319 | 1            | 1    | 2.14           | 2.87            | 16                        | 12                                       | 3UTR         |
| hsa-miR-11400 | NM_001166660 | NLGN3      | 2984  | 3034 | 1            | 1    | 0.66           | 1.35            | 50                        | 8                                        | 3UTR         |
| hsa-miR-11400 | NM_001319967 | NLRP2B     | 550   | 574  | 1            | 1    | 0.00           | 0.00            | 24                        | 10                                       | 3UTR         |
| hsa-miR-11400 | NM_001319967 | NLRP2B     | 2608  | 2659 | 1            | 1    | 0.00           | 0.00            | 22                        | 13                                       | 3UTR         |
| hsa-miR-11400 | NM_001282143 | NLRX1      | 3252  | 3278 | 1            | 1    | -0.19          | -0.07           | 26                        | 10                                       | 3UTR         |
| hsa-miR-11400 | NM_001282144 | NLRX1      | 3660  | 3686 | 1            | 1    | -0.19          | -0.07           | 26                        | 10                                       | 3UTR         |

| mirnaid       | refseqid     | genesymbol | start | end  | binding<br>p | seed | phylopste<br>m | phylopflan<br>k | binding_region_lengt<br>h | longest_<br>consecut<br>ive_pairi<br>ngs | positio<br>n |
|---------------|--------------|------------|-------|------|--------------|------|----------------|-----------------|---------------------------|------------------------------------------|--------------|
| hsa-miR-11400 | NM_001282358 | NLRX1      | 3196  | 3222 | 1            | 1    | -0.19          | -0.07           | 26                        | 10                                       | 3UTR         |
| hsa-miR-11400 | NM_024618    | NLRX1      | 3279  | 3305 | 1            | 1    | -0.19          | -0.07           | 26                        | 10                                       | 3UTR         |
| hsa-miR-11400 | XM_017005517 | NME6       | 4090  | 4110 | 1            | 1    | 0.00           | 0.00            | 20                        | 9                                        | 3UTR         |
| hsa-miR-11400 | XM_017005517 | NME6       | 804   | 823  | 1            | 1    | 0.00           | 0.00            | 19                        | 10                                       | 3UTR         |
| hsa-miR-11400 | NM_005793    | NME6       | 1043  | 1062 | 1            | 1    | -0.02          | 0.35            | 19                        | 10                                       | 3UTR         |
| hsa-miR-11400 | NM_001198546 | NOL4       | 2074  | 2123 | 1            | 1    | 2.86           | 3.59            | 33                        | 8                                        | 3UTR         |
| hsa-miR-11400 | NM_001198549 | NOL4       | 1370  | 1419 | 1            | 1    | 2.96           | 1.53            | 33                        | 8                                        | 3UTR         |
| hsa-miR-11400 | NM_001284388 | NOLC1      | 3389  | 3407 | 1            | 1    | 0.01           | -0.04           | 18                        | 17                                       | 3UTR         |
| hsa-miR-11400 | NM_001284389 | NOLC1      | 3362  | 3380 | 1            | 1    | -0.38          | -0.48           | 18                        | 17                                       | 3UTR         |
| hsa-miR-11400 | NM_004741    | NOLC1      | 3359  | 3377 | 1            | 1    | -0.38          | -0.48           | 18                        | 17                                       | 3UTR         |
| hsa-miR-11400 | NM_004646    | NPHS1      | 4540  | 4560 | 1            | 1    | 1.16           | 1.68            | 20                        | 9                                        | 3UTR         |
| hsa-miR-11400 | XM_011521452 | NPTN       | 1256  | 1275 | 1            | 1    | 0.00           | 0.00            | 19                        | 8                                        | 3UTR         |
| hsa-miR-11400 | NM_001370180 | NPY2R      | 2546  | 2586 | 1            | 1    | 0.36           | 0.25            | 18                        | 16                                       | 3UTR         |
| hsa-miR-11400 | NM_000910    | NPY2R      | 2550  | 2590 | 1            | 1    | 0.36           | 0.25            | 18                        | 16                                       | 3UTR         |
| hsa-miR-11400 | XM_005277644 | NPY4R2     | 1904  | 1928 | 1            | 1    | 0.00           | 0.00            | 24                        | 7                                        | 3UTR         |
| hsa-miR-11400 | XM_006717545 | NPY4R2     | 1748  | 1772 | 1            | 1    | 0.00           | 0.00            | 24                        | 7                                        | 3UTR         |
| hsa-miR-11400 | XM_006713451 | NR1D2      | 3918  | 3965 | 1            | 1    | 0.00           | 0.00            | 19                        | 9                                        | 3UTR         |



| mirnaid       | refseqid     | genesymbol | start | end   | binding<br>p | seed | phylopste<br>m | phylopflan<br>k | binding_region_lengt<br>h | longest_<br>consecut<br>ive_pairi<br>ngs | positio<br>n |
|---------------|--------------|------------|-------|-------|--------------|------|----------------|-----------------|---------------------------|------------------------------------------|--------------|
| hsa-miR-11400 | NM_005126    | NR1D2      | 4397  | 4415  | 1            | 1    | 1.67           | 2.09            | 18                        | 9                                        | 3UTR         |
| hsa-miR-11400 | NM_001206977 | NR1H4      | 2771  | 2792  | 1            | 1    | 0.00           | 0.00            | 21                        | 9                                        | 3UTR         |
| hsa-miR-11400 | NM_001206978 | NR1H4      | 2328  | 2346  | 1            | 1    | 0.86           | 0.69            | 18                        | 14                                       | 3UTR         |
| hsa-miR-11400 | NM_001206979 | NR1H4      | 2604  | 2625  | 1            | 1    | 0.00           | 0.00            | 21                        | 9                                        | 3UTR         |
| hsa-miR-11400 | NM_001206979 | NR1H4      | 2481  | 2499  | 1            | 1    | 1.33           | 0.83            | 18                        | 14                                       | 3UTR         |
| hsa-miR-11400 | NM_001206992 | NR1H4      | 2267  | 2288  | 1            | 1    | 0.00           | 0.00            | 21                        | 9                                        | 3UTR         |
| hsa-miR-11400 | NM_033013    | NR1I2      | 2090  | 2108  | 1            | 1    | 2.94           | 2.69            | 18                        | 12                                       | 3UTR         |
| hsa-miR-11400 | NM_004959    | NR5A1      | 2983  | 3002  | 1            | 1    | 0.48           | 0.64            | 19                        | 9                                        | 3UTR         |
| hsa-miR-11400 | NM_017970    | NRDE2      | 12734 | 12759 | 1            | 1    | 5.00           | 3.81            | 25                        | 8                                        | 3UTR         |
| hsa-miR-11400 | NM_017970    | NRDE2      | 7626  | 7643  | 1            | 1    | 0.48           | -0.08           | 17                        | 11                                       | 3UTR         |
| hsa-miR-11400 | XM_011544512 | NRG1       | 8198  | 8217  | 1            | 1    | 0.00           | 0.00            | 19                        | 6                                        | 3UTR         |
| hsa-miR-11400 | NM_138573    | NRG4       | 1603  | 1625  | 1            | 1    | 0.07           | -0.03           | 22                        | 12                                       | 3UTR         |
| hsa-miR-11400 | XM_005267709 | NRL        | 1906  | 1925  | 1            | 1    | 0.00           | 0.00            | 19                        | 18                                       | 3UTR         |
| hsa-miR-11400 | NM_001354768 | NRL        | 1827  | 1846  | 1            | 1    | 0.00           | 0.00            | 19                        | 18                                       | 3UTR         |
| hsa-miR-11400 | NM_001354769 | NRL        | 2016  | 2035  | 1            | 1    | 0.00           | 0.00            | 19                        | 18                                       | 3UTR         |
| hsa-miR-11400 | NM_172349    | NSD1       | 11834 | 11856 | 1            | 1    | -0.17          | 0.46            | 22                        | 10                                       | 3UTR         |
| hsa-miR-11400 | NM_001365684 | NSD1       | 11711 | 11733 | 1            | 1    | 0.31           | 0.14            | 22                        | 10                                       | 3UTR         |

| mirnaid       | refseqid     | genesymbol | start | end  | binding<br>p | seed | phylopste<br>m | phylopflan<br>k | binding_region_lengt<br>h | longest_<br>consecut<br>ive_pairi<br>ngs | positio<br>n |
|---------------|--------------|------------|-------|------|--------------|------|----------------|-----------------|---------------------------|------------------------------------------|--------------|
| hsa-miR-11400 | NM_133334    | NSD2       | 6689  | 6708 | 0.980769     | 1    | -0.50          | -0.48           | 19                        | 10                                       | 3UTR         |
| hsa-miR-11400 | NM_133334    | NSD2       | 3187  | 3220 | 1            | 1    | -0.07          | -0.18           | 17                        | 15                                       | 3UTR         |
| hsa-miR-11400 | XM_006713914 | NSD2       | 7044  | 7063 | 1            | 1    | 0.00           | 0.00            | 19                        | 10                                       | 3UTR         |
| hsa-miR-11400 | XM_006713914 | NSD2       | 3542  | 3575 | 1            | 1    | 0.00           | 0.00            | 17                        | 15                                       | 3UTR         |
| hsa-miR-11400 | XM_017008588 | NSD2       | 2958  | 2977 | 1            | 1    | 0.00           | 0.00            | 19                        | 9                                        | 3UTR         |
| hsa-miR-11400 | NM_015537    | NSMF       | 3480  | 3499 | 1            | 1    | -0.36          | 0.16            | 19                        | 8                                        | 3UTR         |
| hsa-miR-11400 | NM_001130969 | NSMF       | 3486  | 3505 | 1            | 1    | -0.36          | 0.16            | 19                        | 8                                        | 3UTR         |
| hsa-miR-11400 | NM_001130970 | NSMF       | 3417  | 3436 | 1            | 1    | -0.36          | 0.16            | 19                        | 8                                        | 3UTR         |
| hsa-miR-11400 | NM_001130971 | NSMF       | 3411  | 3430 | 1            | 1    | -0.36          | 0.16            | 19                        | 8                                        | 3UTR         |
| hsa-miR-11400 | NM_001178064 | NSMF       | 3396  | 3415 | 1            | 1    | -0.36          | 0.16            | 19                        | 8                                        | 3UTR         |
| hsa-miR-11400 | NM_018044    | NSUN5      | 1458  | 1483 | 1            | 1    | 2.24           | 3.59            | 25                        | 9                                        | 3UTR         |
| hsa-miR-11400 | NM_001168348 | NSUN5      | 1344  | 1369 | 1            | 1    | 4.64           | 2.30            | 25                        | 9                                        | 3UTR         |
| hsa-miR-11400 | NM_001351174 | NT5C2      | 3312  | 3335 | 1            | 1    | 2.28           | 2.07            | 23                        | 8                                        | 3UTR         |
| hsa-miR-11400 | NM_152729    | NT5DC1     | 6090  | 6107 | 1            | 1    | 0.14           | 0.16            | 17                        | 16                                       | 3UTR         |
| hsa-miR-11400 | NM_152729    | NT5DC1     | 4630  | 4664 | 1            | 1    | 0.14           | 0.25            | 34                        | 8                                        | 3UTR         |
| hsa-miR-11400 | NM_001048209 | NTM        | 1300  | 1350 | 1            | 1    | 0.46           | 0.98            | 18                        | 8                                        | 3UTR         |
| hsa-miR-11400 | NM_032536    | NTNG2      | 4190  | 4208 | 1            | 1    | 0.41           | -0.04           | 18                        | 17                                       | 3UTR         |

| mirnaid       | refseqid     | genesymbol | start | end  | binding<br>p | seed | phylopste<br>m | phylopflan<br>k | binding_region_lengt<br>h | longest_<br>consecut<br>ive_pairi<br>ngs | positio<br>n |
|---------------|--------------|------------|-------|------|--------------|------|----------------|-----------------|---------------------------|------------------------------------------|--------------|
| hsa-miR-11400 | NM_022731    | NUCKS1     | 6070  | 6089 | 1            | 1    | 3.94           | 3.97            | 19                        | 9                                        | 3UTR         |
| hsa-miR-11400 | NM_152395    | NUDT16     | 3817  | 3837 | 1            | 1    | -0.01          | 0.15            | 20                        | 12                                       | 3UTR         |
| hsa-miR-11400 | NM_001171905 | NUDT16     | 3652  | 3672 | 1            | 1    | -0.01          | 0.15            | 20                        | 12                                       | 3UTR         |
| hsa-miR-11400 | NM_001171905 | NUDT16     | 1746  | 1764 | 1            | 1    | -0.10          | -0.40           | 18                        | 7                                        | 3UTR         |
| hsa-miR-11400 | NM_198038    | NUDT9      | 1077  | 1098 | 1            | 1    | 0.11           | -0.39           | 21                        | 8                                        | 3UTR         |
| hsa-miR-11400 | NM_001248011 | NUDT9      | 1318  | 1339 | 1            | 1    | 0.00           | 0.00            | 21                        | 8                                        | 3UTR         |
| hsa-miR-11400 | NM_017681    | NUP62CL    | 1414  | 1431 | 1            | 1    | 1.21           | 0.66            | 17                        | 9                                        | 3UTR         |
| hsa-miR-11400 | NM_206840    | NVL        | 2627  | 2643 | 1            | 1    | 1.00           | 2.27            | 16                        | 15                                       | 3UTR         |
| hsa-miR-11400 | NM_001243146 | NVL        | 2377  | 2393 | 1            | 1    | 1.00           | 2.27            | 16                        | 15                                       | 3UTR         |
| hsa-miR-11400 | NM_001081491 | NXF1       | 1168  | 1200 | 1            | 1    | 3.30           | 3.55            | 18                        | 16                                       | 3UTR         |
| hsa-miR-11400 | NM_145283    | NXNL2      | 1164  | 1187 | 1            | 1    | -0.19          | 0.01            | 23                        | 10                                       | 3UTR         |
| hsa-miR-11400 | NM_152745    | NXPH1      | 2316  | 2335 | 1            | 1    | 0.73           | 1.72            | 19                        | 15                                       | 3UTR         |
| hsa-miR-11400 | NM_018698    | NXT2       | 1167  | 1187 | 1            | 1    | 0.60           | 0.33            | 20                        | 11                                       | 3UTR         |
| hsa-miR-11400 | XM_005246708 | NYAP2      | 7148  | 7174 | 1            | 1    | 0.00           | 0.00            | 26                        | 8                                        | 3UTR         |
| hsa-miR-11400 | NM_001032731 | OAS2       | 1536  | 1573 | 1            | 1    | 0.09           | 0.02            | 23                        | 8                                        | 3UTR         |
| hsa-miR-11400 | NM_001032731 | OAS2       | 1625  | 1649 | 1            | 1    | -0.02          | 0.07            | 19                        | 7                                        | 3UTR         |
| hsa-miR-11400 | NM_001300984 | OCA2       | 2675  | 2693 | 1            | 1    | 0.00           | 0.00            | 18                        | 14                                       | 3UTR         |

| mirnaid       | refseqid     | genesymbol | start | end   | binding<br>p | seed | phylopste<br>m | phylopflan<br>k | binding_region_lengt<br>h | longest_<br>consecut<br>ive_pairi<br>ngs | positio<br>n |
|---------------|--------------|------------|-------|-------|--------------|------|----------------|-----------------|---------------------------|------------------------------------------|--------------|
| hsa-miR-11400 | NM_000275    | OCA2       | 2747  | 2765  | 1            | 1    | 0.00           | 0.00            | 18                        | 14                                       | 3UTR         |
| hsa-miR-11400 | NM_001164245 | ODR4       | 2809  | 2827  | 0.953846     | 1    | 0.72           | 0.15            | 18                        | 15                                       | 3UTR         |
| hsa-miR-11400 | NM_001164246 | ODR4       | 2782  | 2800  | 0.953846     | 1    | 0.72           | 0.15            | 18                        | 15                                       | 3UTR         |
| hsa-miR-11400 | NM_018233    | OGFOD1     | 2538  | 2563  | 1            | 1    | -0.02          | -0.08           | 25                        | 8                                        | 3UTR         |
| hsa-miR-11400 | NM_181672    | OGT        | 3563  | 3587  | 1            | 1    | 1.55           | 1.68            | 24                        | 9                                        | 3UTR         |
| hsa-miR-11400 | NM_181673    | OGT        | 3533  | 3557  | 1            | 1    | 1.55           | 1.68            | 24                        | 9                                        | 3UTR         |
| hsa-miR-11400 | NM_004852    | ONECUT2    | 13110 | 13129 | 1            | 1    | 0.78           | 0.93            | 19                        | 10                                       | 3UTR         |
| hsa-miR-11400 | XM_006723403 | OPA3       | 3490  | 3521  | 0.980769     | 1    | 0.00           | 0.00            | 20                        | 11                                       | 3UTR         |
| hsa-miR-11400 | NM_025136    | OPA3       | 5197  | 5222  | 1            | 1    | -0.19          | 0.05            | 25                        | 8                                        | 3UTR         |
| hsa-miR-11400 | NM_033207    | OPALIN     | 2859  | 2888  | 1            | 1    | 0.49           | 1.25            | 19                        | 6                                        | 3UTR         |
| hsa-miR-11400 | NM_001040103 | OPALIN     | 2898  | 2927  | 1            | 1    | 0.98           | 1.07            | 19                        | 6                                        | 3UTR         |
| hsa-miR-11400 | NM_001319105 | OPCML      | 3879  | 3904  | 1            | 1    | 2.70           | 1.52            | 25                        | 8                                        | 3UTR         |
| hsa-miR-11400 | NM_002547    | OPHN1      | 5083  | 5101  | 1            | 1    | 1.50           | 1.82            | 18                        | 8                                        | 3UTR         |
| hsa-miR-11400 | NM_001282904 | OPRK1      | 4461  | 4484  | 1            | 1    | 3.64           | 2.78            | 23                        | 10                                       | 3UTR         |
| hsa-miR-11400 | NM_001200019 | OPRL1      | 1684  | 1703  | 1            | 1    | 0.00           | 0.00            | 19                        | 12                                       | 3UTR         |
| hsa-miR-11400 | NM_001285526 | OPRM1      | 5904  | 5928  | 1            | 1    | 0.19           | -0.11           | 24                        | 12                                       | 3UTR         |
| hsa-miR-11400 | NM_000914    | OPRM1      | 5220  | 5244  | 1            | 1    | 0.19           | -0.11           | 24                        | 12                                       | 3UTR         |

| mirnaid       | refseqid     | genesymbol | start | end  | binding<br>p | seed | phylopste<br>m | phylopflan<br>k | binding_region_lengt<br>h | longest_<br>consecut<br>ive_pairi<br>ngs | positio<br>n |
|---------------|--------------|------------|-------|------|--------------|------|----------------|-----------------|---------------------------|------------------------------------------|--------------|
| hsa-miR-11400 | NM_001145279 | OPRM1      | 5717  | 5741 | 1            | 1    | 0.19           | -0.11           | 24                        | 12                                       | 3UTR         |
| hsa-miR-11400 | NM_001145280 | OPRM1      | 5148  | 5172 | 1            | 1    | 0.19           | -0.11           | 24                        | 12                                       | 3UTR         |
| hsa-miR-11400 | NM_001145281 | OPRM1      | 4689  | 4713 | 1            | 1    | 0.19           | -0.11           | 24                        | 12                                       | 3UTR         |
| hsa-miR-11400 | NM_001145287 | OPRM1      | 5923  | 5947 | 1            | 1    | 0.19           | -0.11           | 24                        | 12                                       | 3UTR         |
| hsa-miR-11400 | NM_001386033 | OR11G2     | 3122  | 3152 | 1            | 1    | 0.00           | 0.00            | 24                        | 12                                       | 3UTR         |
| hsa-miR-11400 | NM_001005503 | OR11G2     | 2495  | 2525 | 1            | 1    | 0.00           | 0.00            | 24                        | 12                                       | 3UTR         |
| hsa-miR-11400 | NM_014565    | OR1A1      | 2034  | 2052 | 1            | 1    | 0.45           | 0.47            | 18                        | 13                                       | 3UTR         |
| hsa-miR-11400 | NM_003553    | OR1E1      | 1054  | 1096 | 1            | 1    | 0.06           | 0.72            | 21                        | 10                                       | 3UTR         |
| hsa-miR-11400 | NM_001004456 | OR1M1      | 2387  | 2405 | 1            | 1    | 0.00           | 0.00            | 18                        | 9                                        | 3UTR         |
| hsa-miR-11400 | NM_001005287 | OR2A1      | 3965  | 3988 | 1            | 1    | -0.02          | -0.10           | 23                        | 15                                       | 3UTR         |
| hsa-miR-11400 | NM_001013355 | OR2G6      | 4622  | 4641 | 1            | 1    | 0.00           | 0.00            | 19                        | 10                                       | 3UTR         |
| hsa-miR-11400 | NM_001013355 | OR2G6      | 5163  | 5185 | 1            | 1    | 0.00           | 0.00            | 22                        | 11                                       | 3UTR         |
| hsa-miR-11400 | NM_017504    | OR2M4      | 5572  | 5613 | 1            | 1    | 0.00           | 0.00            | 21                        | 9                                        | 3UTR         |
| hsa-miR-11400 | NM_017504    | OR2M4      | 2391  | 2410 | 1            | 1    | 0.00           | 0.00            | 19                        | 8                                        | 3UTR         |
| hsa-miR-11400 | NM_001004692 | OR2T12     | 3484  | 3509 | 1            | 1    | 0.00           | 0.00            | 25                        | 6                                        | 3UTR         |
| hsa-miR-11400 | NM_001004136 | OR2T2      | 2896  | 2919 | 1            | 1    | 0.00           | 0.00            | 23                        | 10                                       | 3UTR         |
| hsa-miR-11400 | NM_001001827 | OR2T35     | 2454  | 2493 | 1            | 1    | 0.00           | 0.00            | 24                        | 10                                       | 3UTR         |

| mirnaid       | refseqid     | genesymbol | start | end  | binding<br>p | seed | phylopste<br>m | phylopflan<br>k | binding_region_lengt<br>h | longest_<br>consecut<br>ive_pairi<br>ngs | positio<br>n |
|---------------|--------------|------------|-------|------|--------------|------|----------------|-----------------|---------------------------|------------------------------------------|--------------|
| hsa-miR-11400 | NM_002550    | OR3A1      | 1579  | 1598 | 1            | 1    | 0.00           | 0.00            | 19                        | 7                                        | 3UTR         |
| hsa-miR-11400 | NM_001386029 | OR4K13     | 2949  | 2968 | 1            | 1    | 0.00           | 0.00            | 19                        | 7                                        | 3UTR         |
| hsa-miR-11400 | NM_001004714 | OR4K13     | 2653  | 2672 | 1            | 1    | 0.00           | 0.00            | 19                        | 7                                        | 3UTR         |
| hsa-miR-11400 | NM_001004715 | OR4K17     | 1423  | 1442 | 1            | 1    | 0.00           | 0.00            | 19                        | 13                                       | 3UTR         |
| hsa-miR-11400 | NM_001004754 | OR51I2     | 1604  | 1635 | 1            | 1    | 0.00           | 0.00            | 31                        | 10                                       | 3UTR         |
| hsa-miR-11400 | NM_001004754 | OR51I2     | 2410  | 2435 | 1            | 1    | 0.00           | 0.00            | 25                        | 10                                       | 3UTR         |
| hsa-miR-11400 | NM_001004755 | OR51L1     | 3527  | 3547 | 1            | 1    | -0.11          | 0.04            | 20                        | 11                                       | 3UTR         |
| hsa-miR-11400 | NM_001001917 | OR56A1     | 2421  | 2442 | 1            | 1    | 0.00           | 0.00            | 21                        | 8                                        | 3UTR         |
| hsa-miR-11400 | NM_001001917 | OR56A1     | 4208  | 4235 | 1            | 1    | 0.00           | 0.00            | 15                        | 8                                        | 3UTR         |
| hsa-miR-11400 | NM_001003443 | OR56A3     | 2466  | 2505 | 1            | 1    | 0.00           | 0.00            | 24                        | 9                                        | 3UTR         |
| hsa-miR-11400 | NM_001001954 | OR5A2      | 3038  | 3059 | 1            | 1    | 0.00           | 0.00            | 14                        | 12                                       | 3UTR         |
| hsa-miR-11400 | NM_001004729 | OR5AN1     | 4791  | 4825 | 1            | 1    | 0.06           | 0.10            | 24                        | 9                                        | 3UTR         |
| hsa-miR-11400 | NM_001005497 | OR6C75     | 2813  | 2828 | 1            | 1    | 0.00           | 0.00            | 15                        | 7                                        | 3UTR         |
| hsa-miR-11400 | NM_001348233 | OR6J1      | 3308  | 3326 | 1            | 1    | 0.00           | 0.00            | 18                        | 9                                        | 3UTR         |
| hsa-miR-11400 | NM_001005191 | OR7D4      | 2630  | 2648 | 0.991453     | 1    | 0.00           | 0.00            | 18                        | 6                                        | 3UTR         |
| hsa-miR-11400 | NM_001005467 | OR8B3      | 1658  | 1710 | 1            | 1    | -1.63          | 0.34            | 21                        | 8                                        | 3UTR         |
| hsa-miR-11400 | NM_001005199 | OR8H1      | 1944  | 1963 | 1            | 1    | 0.00           | 0.00            | 19                        | 10                                       | 3UTR         |

| mirnaid       | refseqid     | genesymbol | start | end  | binding<br>p | seed | phylopste<br>m | phylopflan<br>k | binding_region_lengt<br>h | longest_<br>consecut<br>ive_pairi<br>ngs | positio<br>n |
|---------------|--------------|------------|-------|------|--------------|------|----------------|-----------------|---------------------------|------------------------------------------|--------------|
| hsa-miR-11400 | NM_001271818 | ORAI2      | 3293  | 3317 | 1            | 1    | 0.20           | 0.03            | 24                        | 10                                       | 3UTR         |
| hsa-miR-11400 | NM_032831    | ORAI2      | 3161  | 3185 | 1            | 1    | -0.01          | 0.17            | 24                        | 10                                       | 3UTR         |
| hsa-miR-11400 | NM_001126340 | ORAI2      | 3270  | 3294 | 1            | 1    | -0.01          | 0.17            | 24                        | 10                                       | 3UTR         |
| hsa-miR-11400 | NM_001371387 | ORMDL1     | 3441  | 3473 | 1            | 1    | 0.67           | 0.11            | 23                        | 9                                        | 3UTR         |
| hsa-miR-11400 | XM_017017164 | OSBPL5     | 3411  | 3453 | 1            | 1    | 0.00           | 0.00            | 42                        | 11                                       | 3UTR         |
| hsa-miR-11400 | NM_032523    | OSBPL6     | 5423  | 5455 | 0.974359     | 1    | -0.35          | -0.01           | 32                        | 8                                        | 3UTR         |
| hsa-miR-11400 | NM_145739    | OSBPL6     | 5044  | 5076 | 0.974359     | 1    | -0.35          | -0.01           | 32                        | 8                                        | 3UTR         |
| hsa-miR-11400 | XM_017003271 | OSBPL6     | 5323  | 5355 | 1            | 1    | 0.00           | 0.00            | 32                        | 8                                        | 3UTR         |
| hsa-miR-11400 | NM_001201480 | OSBPL6     | 5498  | 5530 | 1            | 1    | 0.00           | 0.00            | 32                        | 8                                        | 3UTR         |
| hsa-miR-11400 | NM_001201481 | OSBPL6     | 5330  | 5362 | 1            | 1    | 0.00           | 0.00            | 32                        | 8                                        | 3UTR         |
| hsa-miR-11400 | NM_138348    | OTULIN     | 7764  | 7781 | 0.980769     | 1    | -0.45          | -0.01           | 17                        | 16                                       | 3UTR         |
| hsa-miR-11400 | NM_002565    | P2RY4      | 1414  | 1437 | 1            | 1    | 0.00           | 0.00            | 23                        | 9                                        | 3UTR         |
| hsa-miR-11400 | NM_001277204 | P2RY6      | 1797  | 1841 | 1            | 1    | -0.16          | -0.17           | 23                        | 10                                       | 3UTR         |
| hsa-miR-11400 | NM_001277205 | P2RY6      | 1939  | 1983 | 1            | 1    | -0.24          | -0.15           | 23                        | 10                                       | 3UTR         |
| hsa-miR-11400 | NM_001277206 | P2RY6      | 1904  | 1948 | 1            | 1    | 0.13           | -0.15           | 23                        | 10                                       | 3UTR         |
| hsa-miR-11400 | NM_001277207 | P2RY6      | 1886  | 1930 | 1            | 1    | -0.04          | 0.13            | 23                        | 10                                       | 3UTR         |
| hsa-miR-11400 | NM_176796    | P2RY6      | 1972  | 2016 | 1            | 1    | -0.24          | -0.15           | 23                        | 10                                       | 3UTR         |

| mirnaid       | refseqid     | genesymbol | start | end  | binding<br>p | seed | phylopste<br>m | phylopflan<br>k | binding_region_lengt<br>h | longest_<br>consecut<br>ive_pairi<br>ngs | positio<br>n |
|---------------|--------------|------------|-------|------|--------------|------|----------------|-----------------|---------------------------|------------------------------------------|--------------|
| hsa-miR-11400 | NM_176797    | P2RY6      | 1812  | 1856 | 1            | 1    | -0.24          | -0.15           | 23                        | 10                                       | 3UTR         |
| hsa-miR-11400 | NM_176798    | P2RY6      | 2090  | 2134 | 1            | 1    | -0.16          | -0.17           | 23                        | 10                                       | 3UTR         |
| hsa-miR-11400 | XM_005274022 | P2RY6      | 3706  | 3727 | 1            | 1    | 0.00           | 0.00            | 21                        | 12                                       | 3UTR         |
| hsa-miR-11400 | NM_001142599 | P4HA2      | 3636  | 3656 | 0.953846     | 1    | 1.93           | 1.93            | 20                        | 7                                        | 3UTR         |
| hsa-miR-11400 | NM_001365678 | P4HA2      | 4549  | 4584 | 1            | 1    | 0.54           | 0.07            | 28                        | 9                                        | 3UTR         |
| hsa-miR-11400 | NM_001142599 | P4HA2      | 4518  | 4553 | 1            | 1    | 0.01           | 0.19            | 28                        | 9                                        | 3UTR         |
| hsa-miR-11400 | NM_001267803 | PAAF1      | 2223  | 2246 | 1            | 1    | 0.23           | 0.29            | 23                        | 8                                        | 3UTR         |
| hsa-miR-11400 | NM_001267805 | PAAF1      | 2210  | 2233 | 1            | 1    | 0.23           | 0.29            | 23                        | 8                                        | 3UTR         |
| hsa-miR-11400 | NM_001267806 | PAAF1      | 2127  | 2150 | 1            | 1    | 0.00           | 0.00            | 23                        | 8                                        | 3UTR         |
| hsa-miR-11400 | NM_025155    | PAAF1      | 2154  | 2177 | 1            | 1    | 0.23           | 0.29            | 23                        | 8                                        | 3UTR         |
| hsa-miR-11400 | NM_001363556 | PAAF1      | 2404  | 2427 | 1            | 1    | 0.00           | 0.00            | 23                        | 8                                        | 3UTR         |
| hsa-miR-11400 | NM_001258345 | PACRGL     | 4182  | 4201 | 0.980769     | 1    | -0.56          | -0.07           | 19                        | 12                                       | 3UTR         |
| hsa-miR-11400 | NM_001258346 | PACRGL     | 3875  | 3894 | 0.980769     | 1    | -0.56          | -0.07           | 19                        | 12                                       | 3UTR         |
| hsa-miR-11400 | NM_001317849 | PACRGL     | 3902  | 3921 | 0.980769     | 1    | -0.56          | -0.07           | 19                        | 12                                       | 3UTR         |
| hsa-miR-11400 | NM_145048    | PACRGL     | 4101  | 4120 | 0.980769     | 1    | -0.56          | -0.07           | 19                        | 12                                       | 3UTR         |
| hsa-miR-11400 | NM_001330748 | PACRGL     | 3733  | 3752 | 0.980769     | 1    | -0.56          | -0.07           | 19                        | 12                                       | 3UTR         |
| hsa-miR-11400 | NM_001130727 | PACRGL     | 3807  | 3826 | 0.980769     | 1    | -0.56          | -0.07           | 19                        | 12                                       | 3UTR         |



| mirnaid       | refseqid     | genesymbol | start | end  | binding<br>p | seed | phylopste<br>m | phylopflan<br>k | binding_region_lengt<br>h | longest_<br>consecut<br>ive_pairi<br>ngs | positio<br>n |
|---------------|--------------|------------|-------|------|--------------|------|----------------|-----------------|---------------------------|------------------------------------------|--------------|
| hsa-miR-11400 | NM_013358    | PADI1      | 2221  | 2240 | 1            | 1    | 0.00           | 0.00            | 19                        | 12                                       | 3UTR         |
| hsa-miR-11400 | NM_002571    | PAEP       | 808   | 834  | 1            | 1    | -0.31          | -0.12           | 14                        | 12                                       | 3UTR         |
| hsa-miR-11400 | NM_001018049 | PAEP       | 837   | 863  | 1            | 1    | -0.31          | -0.12           | 14                        | 12                                       | 3UTR         |
| hsa-miR-11400 | XM_006710670 | PAFAH2     | 2087  | 2114 | 1            | 1    | 0.00           | 0.00            | 27                        | 12                                       | 3UTR         |
| hsa-miR-11400 | NM_002576    | PAK1       | 3230  | 3243 | 1            | 1    | -0.23          | 0.26            | 13                        | 12                                       | 3UTR         |
| hsa-miR-11400 | NM_001128620 | PAK1       | 3279  | 3292 | 1            | 1    | -0.23          | 0.26            | 13                        | 12                                       | 3UTR         |
| hsa-miR-11400 | NM_002577    | PAK2       | 3047  | 3095 | 1            | 1    | 0.57           | 0.59            | 19                        | 8                                        | 3UTR         |
| hsa-miR-11400 | XM_017029563 | PAK3       | 5975  | 5997 | 1            | 1    | 0.00           | 0.00            | 22                        | 8                                        | 3UTR         |
| hsa-miR-11400 | NM_002578    | PAK3       | 5823  | 5845 | 1            | 1    | 2.82           | 1.37            | 22                        | 8                                        | 3UTR         |
| hsa-miR-11400 | NM_002578    | PAK3       | 8246  | 8266 | 1            | 1    | 0.77           | 0.59            | 20                        | 11                                       | 3UTR         |
| hsa-miR-11400 | NM_001324328 | PAK3       | 5653  | 5675 | 1            | 1    | 2.82           | 1.37            | 22                        | 8                                        | 3UTR         |
| hsa-miR-11400 | NM_001324328 | PAK3       | 8076  | 8096 | 1            | 1    | 0.77           | 0.59            | 20                        | 11                                       | 3UTR         |
| hsa-miR-11400 | NM_001324329 | PAK3       | 5868  | 5890 | 1            | 1    | 2.82           | 1.37            | 22                        | 8                                        | 3UTR         |
| hsa-miR-11400 | NM_001324329 | PAK3       | 8291  | 8311 | 1            | 1    | 0.77           | 0.59            | 20                        | 11                                       | 3UTR         |
| hsa-miR-11400 | NM_001128166 | PAK3       | 5578  | 5600 | 1            | 1    | 1.44           | 1.01            | 22                        | 8                                        | 3UTR         |
| hsa-miR-11400 | NM_001128166 | PAK3       | 8001  | 8021 | 1            | 1    | 0.63           | 1.32            | 20                        | 11                                       | 3UTR         |
| hsa-miR-11400 | NM_001128167 | PAK3       | 5505  | 5527 | 1            | 1    | 1.44           | 1.01            | 22                        | 8                                        | 3UTR         |

| mirnaid       | refseqid     | genesymbol | start | end  | binding<br>p | seed | phylopste<br>m | phylopflan<br>k | binding_region_lengt<br>h | longest_<br>consecut<br>ive_pairi<br>ngs | positio<br>n |
|---------------|--------------|------------|-------|------|--------------|------|----------------|-----------------|---------------------------|------------------------------------------|--------------|
| hsa-miR-11400 | NM_001128167 | PAK3       | 7928  | 7948 | 1            | 1    | 0.63           | 1.32            | 20                        | 11                                       | 3UTR         |
| hsa-miR-11400 | NM_001128168 | PAK3       | 5934  | 5956 | 1            | 1    | 2.82           | 1.37            | 22                        | 8                                        | 3UTR         |
| hsa-miR-11400 | NM_001128168 | PAK3       | 8357  | 8377 | 1            | 1    | 0.77           | 0.59            | 20                        | 11                                       | 3UTR         |
| hsa-miR-11400 | NM_001128172 | PAK3       | 5336  | 5358 | 1            | 1    | 0.00           | 0.00            | 22                        | 8                                        | 3UTR         |
| hsa-miR-11400 | NM_014431    | PALD1      | 3062  | 3083 | 1            | 1    | 0.49           | -0.10           | 21                        | 8                                        | 3UTR         |
| hsa-miR-11400 | NM_0530162   | PALM2AKAP2 | 2149  | 2172 | 0.974359     | 1    | 0.79           | 1.18            | 23                        | 9                                        | 3UTR         |
| hsa-miR-11400 | NM_001037293 | PALM2AKAP2 | 1837  | 1860 | 0.974359     | 1    | 0.89           | 1.17            | 23                        | 9                                        | 3UTR         |
| hsa-miR-11400 | NM_0530162   | PALM2AKAP2 | 4721  | 4746 | 1            | 1    | -0.37          | 0.05            | 25                        | 8                                        | 3UTR         |
| hsa-miR-11400 | NM_147150    | PALM2AKAP2 | 5966  | 5989 | 1            | 1    | -0.56          | -0.37           | 23                        | 9                                        | 3UTR         |
| hsa-miR-11400 | NM_007203    | PALM2AKAP2 | 6005  | 6028 | 1            | 1    | -0.56          | -0.37           | 23                        | 9                                        | 3UTR         |
| hsa-miR-11400 | NM_001004065 | PALM2AKAP2 | 5351  | 5374 | 1            | 1    | -0.56          | -0.37           | 23                        | 9                                        | 3UTR         |
| hsa-miR-11400 | NM_001037293 | PALM2AKAP2 | 4409  | 4434 | 1            | 1    | -0.45          | 0.03            | 25                        | 8                                        | 3UTR         |
| hsa-miR-11400 | NM_001136562 | PALM2AKAP2 | 5189  | 5212 | 1            | 1    | -0.56          | -0.37           | 23                        | 9                                        | 3UTR         |
| hsa-miR-11400 | NM_001198656 | PALM2AKAP2 | 5390  | 5413 | 1            | 1    | -0.56          | -0.37           | 23                        | 9                                        | 3UTR         |
| hsa-miR-11400 | NM_153640    | PANK2      | 4124  | 4141 | 1            | 1    | -0.13          | -0.12           | 17                        | 9                                        | 3UTR         |
| hsa-miR-11400 | XM_017028079 | PANK2      | 3959  | 3976 | 1            | 1    | 0.00           | 0.00            | 17                        | 9                                        | 3UTR         |
| hsa-miR-11400 | NM_024960    | PANK2      | 4131  | 4148 | 1            | 1    | -0.13          | -0.17           | 17                        | 9                                        | 3UTR         |

| mirnaid       | refseqid     | genesymbol | start | end  | binding<br>p | seed | phylopste<br>m | phylopflan<br>k | binding_region_lengt<br>h | longest_<br>consecut<br>ive_pairi<br>ngs | positio<br>n |
|---------------|--------------|------------|-------|------|--------------|------|----------------|-----------------|---------------------------|------------------------------------------|--------------|
| hsa-miR-11400 | NM_024594    | PANK3      | 3231  | 3250 | 1            | 1    | 0.36           | 0.00            | 19                        | 7                                        | 3UTR         |
| hsa-miR-11400 | NM_022894    | PAPOLG     | 5386  | 5405 | 1            | 1    | 0.30           | 0.24            | 19                        | 16                                       | 3UTR         |
| hsa-miR-11400 | NM_022894    | PAPOLG     | 3800  | 3817 | 1            | 1    | 0.47           | 0.64            | 17                        | 9                                        | 3UTR         |
| hsa-miR-11400 | NM_021936    | PAPPA2     | 3855  | 3874 | 1            | 1    | 0.15           | -0.11           | 19                        | 9                                        | 3UTR         |
| hsa-miR-11400 | NM_001272107 | PAQR6      | 1578  | 1606 | 1            | 1    | 3.74           | 2.93            | 28                        | 10                                       | 3UTR         |
| hsa-miR-11400 | NM_198406    | PAQR6      | 1401  | 1429 | 1            | 1    | 2.07           | 2.68            | 28                        | 10                                       | 3UTR         |
| hsa-miR-11400 | NM_001302769 | PARD3B     | 7082  | 7111 | 1            | 1    | 0.54           | 0.16            | 20                        | 8                                        | 3UTR         |
| hsa-miR-11400 | NM_057177    | PARD3B     | 6875  | 6904 | 1            | 1    | 0.54           | 0.16            | 20                        | 8                                        | 3UTR         |
| hsa-miR-11400 | NM_152526    | PARD3B     | 6896  | 6925 | 1            | 1    | 0.54           | 0.16            | 20                        | 8                                        | 3UTR         |
| hsa-miR-11400 | NM_205863    | PARD3B     | 6779  | 6808 | 1            | 1    | 0.54           | 0.16            | 20                        | 8                                        | 3UTR         |
| hsa-miR-11400 | NM_001146106 | PARP9      | 2646  | 2664 | 1            | 1    | -0.35          | 0.12            | 18                        | 17                                       | 3UTR         |
| hsa-miR-11400 | NM_018222    | PARVA      | 4468  | 4492 | 1            | 1    | 0.00           | 0.01            | 24                        | 12                                       | 3UTR         |
| hsa-miR-11400 | NM_001280549 | PAX5       | 4061  | 4081 | 1            | 1    | 0.66           | 0.33            | 20                        | 10                                       | 3UTR         |
| hsa-miR-11400 | NM_001280550 | PAX5       | 3974  | 3994 | 1            | 1    | 0.04           | 0.10            | 20                        | 10                                       | 3UTR         |
| hsa-miR-11400 | NM_001135254 | PAX7       | 5736  | 5762 | 1            | 1    | 0.00           | 0.00            | 26                        | 12                                       | 3UTR         |
| hsa-miR-11400 | NM_002585    | PBX1       | 3023  | 3040 | 1            | 1    | 0.46           | -0.04           | 17                        | 10                                       | 3UTR         |
| hsa-miR-11400 | NM_001353130 | PBX1       | 2411  | 2428 | 1            | 1    | 0.46           | -0.04           | 17                        | 10                                       | 3UTR         |

| mirnaid       | refseqid     | genesymbol | start | end   | binding<br>p | seed | phylopste<br>m | phylopflan<br>k | binding_region_lengt<br>h | longest_<br>consecut<br>ive_pairi<br>ngs | positio<br>n |
|---------------|--------------|------------|-------|-------|--------------|------|----------------|-----------------|---------------------------|------------------------------------------|--------------|
| hsa-miR-11400 | NM_001204961 | PBX1       | 2910  | 2927  | 1            | 1    | -0.16          | -0.13           | 17                        | 10                                       | 3UTR         |
| hsa-miR-11400 | NM_002586    | PBX2       | 1831  | 1855  | 1            | 1    | 1.52           | 3.60            | 24                        | 7                                        | 3UTR         |
| hsa-miR-11400 | NM_001348244 | PCBP3      | 1571  | 1590  | 1            | 1    | -0.03          | 0.16            | 19                        | 8                                        | 3UTR         |
| hsa-miR-11400 | NM_001382278 | PCBP3      | 1628  | 1647  | 1            | 1    | -0.03          | 0.16            | 19                        | 8                                        | 3UTR         |
| hsa-miR-11400 | NM_001382279 | PCBP3      | 1700  | 1719  | 1            | 1    | -0.03          | 0.16            | 19                        | 8                                        | 3UTR         |
| hsa-miR-11400 | NM_001382287 | PCBP3      | 1561  | 1580  | 1            | 1    | -0.03          | 0.16            | 19                        | 8                                        | 3UTR         |
| hsa-miR-11400 | NM_001130141 | PCBP3      | 1553  | 1572  | 1            | 1    | -0.03          | 0.16            | 19                        | 8                                        | 3UTR         |
| hsa-miR-11400 | XM_017006918 | PCBP4      | 1696  | 1713  | 1            | 1    | 0.00           | 0.00            | 17                        | 16                                       | 3UTR         |
| hsa-miR-11400 | XM_017006919 | PCBP4      | 1456  | 1473  | 1            | 1    | 0.00           | 0.00            | 17                        | 16                                       | 3UTR         |
| hsa-miR-11400 | NM_001318374 | PCDH9      | 16569 | 16589 | 1            | 1    | 0.33           | 0.44            | 20                        | 11                                       | 3UTR         |
| hsa-miR-11400 | NM_031859    | PCDHA10    | 6859  | 6883  | 1            | 1    | 0.23           | 1.09            | 24                        | 12                                       | 3UTR         |
| hsa-miR-11400 | NM_031993    | PCDHGA1    | 3577  | 3593  | 1            | 1    | 0.00           | 0.00            | 16                        | 15                                       | 3UTR         |
| hsa-miR-11400 | NM_001286782 | PCMTD1     | 1564  | 1588  | 1            | 1    | 0.87           | 0.60            | 24                        | 9                                        | 3UTR         |
| hsa-miR-11400 | NM_020357    | PCNP       | 1933  | 1951  | 0.961538     | 1    | 1.19           | 0.90            | 18                        | 6                                        | 3UTR         |
| hsa-miR-11400 | NM_006200    | PCSK5      | 4016  | 4056  | 1            | 1    | 0.31           | 0.52            | 27                        | 14                                       | 3UTR         |
| hsa-miR-11400 | NM_016297    | PCYOX1     | 3109  | 3128  | 1            | 1    | 0.14           | 0.09            | 19                        | 9                                        | 3UTR         |
| hsa-miR-11400 | NM_002597    | PDC        | 901   | 923   | 1            | 1    | 4.23           | 4.46            | 22                        | 8                                        | 3UTR         |

| mirnaid       | refseqid     | genesymbol | start | end  | binding<br>p | seed | phylopste<br>m | phylopflan<br>k | binding_region_lengt<br>h | longest_<br>consecut<br>ive_pairi<br>ngs | positio<br>n |
|---------------|--------------|------------|-------|------|--------------|------|----------------|-----------------|---------------------------|------------------------------------------|--------------|
| hsa-miR-11400 | NM_001267559 | PDCD6      | 310   | 332  | 1            | 1    | 4.74           | 4.95            | 22                        | 8                                        | 3UTR         |
| hsa-miR-11400 | NM_016953    | PDE11A     | 6151  | 6168 | 1            | 1    | 0.28           | 0.52            | 17                        | 13                                       | 3UTR         |
| hsa-miR-11400 | NM_001077358 | PDE11A     | 4870  | 4887 | 1            | 1    | 0.58           | 0.19            | 17                        | 13                                       | 3UTR         |
| hsa-miR-11400 | NM_001288769 | PDE1B      | 1958  | 1977 | 0.974359     | 1    | 1.57           | 1.32            | 19                        | 14                                       | 3UTR         |
| hsa-miR-11400 | NM_001315534 | PDE1B      | 1908  | 1927 | 0.974359     | 1    | 1.57           | 1.32            | 19                        | 14                                       | 3UTR         |
| hsa-miR-11400 | NM_000924    | PDE1B      | 2130  | 2149 | 0.974359     | 1    | 1.57           | 1.32            | 19                        | 14                                       | 3UTR         |
| hsa-miR-11400 | NM_001165975 | PDE1B      | 2005  | 2024 | 0.974359     | 1    | 1.57           | 1.32            | 19                        | 14                                       | 3UTR         |
| hsa-miR-11400 | NM_001142386 | PDK3       | 1666  | 1688 | 1            | 1    | 0.26           | 0.29            | 22                        | 8                                        | 3UTR         |
| hsa-miR-11400 | XM_024450296 | PDPK1      | 6214  | 6261 | 1            | 1    | 0.00           | 0.00            | 22                        | 15                                       | 3UTR         |
| hsa-miR-11400 | NM_198389    | PDPN       | 1794  | 1827 | 1            | 1    | 0.07           | -0.02           | 33                        | 10                                       | 3UTR         |
| hsa-miR-11400 | NM_198389    | PDPN       | 2131  | 2149 | 1            | 1    | 0.57           | -0.11           | 18                        | 8                                        | 3UTR         |
| hsa-miR-11400 | XM_006710295 | PDPN       | 1531  | 1564 | 1            | 1    | 0.00           | 0.00            | 33                        | 10                                       | 3UTR         |
| hsa-miR-11400 | NM_006474    | PDPN       | 1725  | 1758 | 1            | 1    | 0.07           | -0.02           | 33                        | 10                                       | 3UTR         |
| hsa-miR-11400 | NM_006474    | PDPN       | 2062  | 2080 | 1            | 1    | 0.57           | -0.11           | 18                        | 8                                        | 3UTR         |
| hsa-miR-11400 | NM_001006624 | PDPN       | 1636  | 1669 | 1            | 1    | 0.07           | -0.02           | 33                        | 10                                       | 3UTR         |
| hsa-miR-11400 | NM_001006624 | PDPN       | 1973  | 1991 | 1            | 1    | 0.57           | -0.11           | 18                        | 8                                        | 3UTR         |
| hsa-miR-11400 | NM_001006625 | PDPN       | 1630  | 1663 | 1            | 1    | 0.07           | -0.02           | 33                        | 10                                       | 3UTR         |

| mirnaid       | refseqid     | genesymbol | start | end   | binding<br>p | seed | phylopste<br>m | phylopflan<br>k | binding_region_lengt<br>h | longest_<br>consecut<br>ive_pairi<br>ngs | positio<br>n |
|---------------|--------------|------------|-------|-------|--------------|------|----------------|-----------------|---------------------------|------------------------------------------|--------------|
| hsa-miR-11400 | NM_001006625 | PDPN       | 1967  | 1985  | 1            | 1    | 0.57           | -0.11           | 18                        | 8                                        | 3UTR         |
| hsa-miR-11400 | XM_005270165 | PDZD7      | 2037  | 2055  | 0.961538     | 1    | 0.00           | 0.00            | 18                        | 8                                        | 3UTR         |
| hsa-miR-11400 | NM_001297576 | PEA15      | 2643  | 2688  | 1            | 1    | 0.80           | 1.62            | 17                        | 10                                       | 3UTR         |
| hsa-miR-11400 | NM_001297578 | PEA15      | 2299  | 2315  | 1            | 1    | 1.80           | 1.63            | 16                        | 10                                       | 3UTR         |
| hsa-miR-11400 | NM_003768    | PEA15      | 2365  | 2381  | 1            | 1    | 1.80           | 1.63            | 16                        | 10                                       | 3UTR         |
| hsa-miR-11400 | NM_000442    | PECAM1     | 5734  | 5754  | 1            | 1    | 0.00           | 0.88            | 20                        | 11                                       | 3UTR         |
| hsa-miR-11400 | NM_001282327 | PES1       | 2524  | 2544  | 1            | 1    | -0.05          | 0.20            | 20                        | 13                                       | 3UTR         |
| hsa-miR-11400 | NM_001282328 | PES1       | 2571  | 2591  | 1            | 1    | -0.05          | 0.20            | 20                        | 13                                       | 3UTR         |
| hsa-miR-11400 | NM_001243225 | PES1       | 2081  | 2101  | 1            | 1    | 0.00           | 0.00            | 20                        | 13                                       | 3UTR         |
| hsa-miR-11400 | NM_003846    | PEX11B     | 1229  | 1252  | 1            | 1    | 3.37           | 3.46            | 23                        | 10                                       | 3UTR         |
| hsa-miR-11400 | NM_001270539 | PEX11G     | 581   | 598   | 1            | 1    | 2.85           | 3.65            | 17                        | 16                                       | 3UTR         |
| hsa-miR-11400 | NM_080662    | PEX11G     | 764   | 781   | 1            | 1    | 2.85           | 3.65            | 17                        | 16                                       | 3UTR         |
| hsa-miR-11400 | XM_011528428 | PEX11G     | 1026  | 1043  | 1            | 1    | 0.00           | 0.00            | 17                        | 16                                       | 3UTR         |
| hsa-miR-11400 | NM_002618    | PEX13      | 2157  | 2207  | 1            | 1    | -0.08          | 0.04            | 26                        | 8                                        | 3UTR         |
| hsa-miR-11400 | NM_017929    | PEX26      | 15993 | 16018 | 1            | 1    | -0.09          | -0.13           | 25                        | 9                                        | 3UTR         |
| hsa-miR-11400 | NM_001127649 | PEX26      | 16241 | 16266 | 1            | 1    | -0.09          | -0.13           | 25                        | 9                                        | 3UTR         |
| hsa-miR-11400 | NM_001199319 | PEX26      | 15846 | 15871 | 1            | 1    | -0.09          | -0.13           | 25                        | 9                                        | 3UTR         |

| mirnaid       | refseqid     | genesymbol | start | end   | binding<br>p | seed | phylopste<br>m | phylopflan<br>k | binding_region_lengt<br>h | longest_<br>consecut<br>ive_pairi<br>ngs | positio<br>n |
|---------------|--------------|------------|-------|-------|--------------|------|----------------|-----------------|---------------------------|------------------------------------------|--------------|
| hsa-miR-11400 | NM_001256754 | PEX5L      | 7814  | 7831  | 1            | 1    | 3.02           | 4.33            | 17                        | 12                                       | 3UTR         |
| hsa-miR-11400 | NM_001354735 | PFKM       | 3411  | 3433  | 1            | 1    | -0.28          | 0.25            | 22                        | 6                                        | 3UTR         |
| hsa-miR-11400 | NM_001354743 | PFKM       | 3294  | 3316  | 1            | 1    | 0.00           | 0.00            | 22                        | 6                                        | 3UTR         |
| hsa-miR-11400 | NM_000289    | PFKM       | 3007  | 3029  | 1            | 1    | -0.28          | 0.25            | 22                        | 6                                        | 3UTR         |
| hsa-miR-11400 | NM_001166686 | PFKM       | 3393  | 3415  | 1            | 1    | -0.28          | 0.25            | 22                        | 6                                        | 3UTR         |
| hsa-miR-11400 | NM_001166687 | PFKM       | 2995  | 3017  | 1            | 1    | -0.28          | 0.25            | 22                        | 6                                        | 3UTR         |
| hsa-miR-11400 | NM_001166688 | PFKM       | 3084  | 3106  | 1            | 1    | -0.28          | 0.25            | 22                        | 6                                        | 3UTR         |
| hsa-miR-11400 | NM_024989    | PGAP1      | 5601  | 5626  | 1            | 1    | 0.42           | -0.01           | 25                        | 10                                       | 3UTR         |
| hsa-miR-11400 | NM_001256238 | PGAP2      | 961   | 980   | 1            | 1    | 0.33           | 1.90            | 19                        | 13                                       | 3UTR         |
| hsa-miR-11400 | NM_001256239 | PGAP2      | 868   | 887   | 1            | 1    | 0.33           | 1.90            | 19                        | 13                                       | 3UTR         |
| hsa-miR-11400 | NM_014489    | PGAP2      | 1063  | 1082  | 1            | 1    | 0.33           | 1.90            | 19                        | 13                                       | 3UTR         |
| hsa-miR-11400 | NM_001346404 | PGAP2      | 967   | 986   | 1            | 1    | 0.33           | 1.90            | 19                        | 13                                       | 3UTR         |
| hsa-miR-11400 | NM_001258311 | PGBD5      | 10628 | 10649 | 1            | 1    | 0.42           | 0.29            | 21                        | 9                                        | 3UTR         |
| hsa-miR-11400 | NM_001207012 | PGF        | 1166  | 1185  | 1            | 1    | 5.91           | 3.14            | 19                        | 7                                        | 3UTR         |
| hsa-miR-11400 | NM_000291    | PGK1       | 1454  | 1474  | 1            | 1    | 0.84           | 1.13            | 20                        | 9                                        | 3UTR         |
| hsa-miR-11400 | NM_173582    | PGM2L1     | 4841  | 4860  | 0.961538     | 1    | 0.07           | -0.06           | 19                        | 7                                        | 3UTR         |
| hsa-miR-11400 | NM_001367286 | PGM3       | 3550  | 3570  | 1            | 1    | 2.01           | 1.61            | 20                        | 9                                        | 3UTR         |

| mirnaid       | refseqid     | genesymbol | start | end   | binding<br>p | seed | phylopste<br>m | phylopflan<br>k | binding_region_lengt<br>h | longest_<br>consecut<br>ive_pairi<br>ngs | positio<br>n |
|---------------|--------------|------------|-------|-------|--------------|------|----------------|-----------------|---------------------------|------------------------------------------|--------------|
| hsa-miR-11400 | NM_001271161 | PGR        | 6536  | 6555  | 1            | 1    | -0.24          | -0.06           | 19                        | 10                                       | 3UTR         |
| hsa-miR-11400 | NM_001271161 | PGR        | 5982  | 6009  | 1            | 1    | 0.73           | 0.21            | 27                        | 8                                        | 3UTR         |
| hsa-miR-11400 | NM_001271162 | PGR        | 5598  | 5617  | 1            | 1    | 0.09           | -0.20           | 19                        | 10                                       | 3UTR         |
| hsa-miR-11400 | NM_000926    | PGR        | 7038  | 7065  | 1            | 1    | 0.74           | 0.27            | 27                        | 8                                        | 3UTR         |
| hsa-miR-11400 | XM_005253334 | PHC1       | 4517  | 4538  | 1            | 1    | 0.00           | 0.00            | 21                        | 9                                        | 3UTR         |
| hsa-miR-11400 | NM_001177996 | PHETA1     | 3160  | 3181  | 1            | 1    | 0.29           | 0.38            | 21                        | 9                                        | 3UTR         |
| hsa-miR-11400 | NM_001177997 | PHETA1     | 3053  | 3074  | 1            | 1    | 0.29           | 0.38            | 21                        | 9                                        | 3UTR         |
| hsa-miR-11400 | NM_014660    | PHF14      | 4071  | 4085  | 1            | 1    | 1.61           | 1.33            | 14                        | 13                                       | 3UTR         |
| hsa-miR-11400 | NM_016621    | PHF21A     | 6209  | 6235  | 1            | 1    | 2.23           | 4.01            | 26                        | 10                                       | 3UTR         |
| hsa-miR-11400 | NM_001101802 | PHF21A     | 6347  | 6373  | 1            | 1    | 2.23           | 4.01            | 26                        | 10                                       | 3UTR         |
| hsa-miR-11400 | NM_138415    | PHF21B     | 3474  | 3492  | 1            | 1    | 1.74           | 2.36            | 18                        | 13                                       | 3UTR         |
| hsa-miR-11400 | NM_015297    | PHF24      | 2205  | 2221  | 1            | 1    | -0.26          | 0.40            | 16                        | 7                                        | 3UTR         |
| hsa-miR-11400 | NM_015153    | PHF3       | 11181 | 11215 | 1            | 1    | -0.18          | -0.34           | 34                        | 10                                       | 3UTR         |
| hsa-miR-11400 | NM_001370348 | PHF3       | 11529 | 11563 | 1            | 1    | -0.18          | -0.34           | 34                        | 10                                       | 3UTR         |
| hsa-miR-11400 | NM_032458    | PHF6       | 2952  | 2976  | 1            | 1    | 1.30           | 1.85            | 24                        | 8                                        | 3UTR         |
| hsa-miR-11400 | NM_001015877 | PHF6       | 2622  | 2646  | 1            | 1    | 1.30           | 1.85            | 24                        | 8                                        | 3UTR         |
| hsa-miR-11400 | NM_001184896 | PHF8       | 4370  | 4385  | 1            | 1    | 0.00           | 0.00            | 15                        | 14                                       | 3UTR         |



| mirnaid       | refseqid     | genesymbol | start | end  | binding<br>p | seed | phylopste<br>m | phylopflan<br>k | binding_region_lengt<br>h | longest_<br>consecut<br>ive_pairi<br>ngs | positio<br>n |
|---------------|--------------|------------|-------|------|--------------|------|----------------|-----------------|---------------------------|------------------------------------------|--------------|
| hsa-miR-11400 | NM_000292    | PHKA2      | 4060  | 4078 | 1            | 1    | 4.28           | 5.24            | 18                        | 10                                       | 3UTR         |
| hsa-miR-11400 | NM_001258459 | PHKG1      | 1782  | 1828 | 1            | 1    | 3.98           | 3.41            | 46                        | 10                                       | 3UTR         |
| hsa-miR-11400 | NM_006213    | PHKG1      | 1686  | 1732 | 1            | 1    | 3.75           | 3.69            | 46                        | 10                                       | 3UTR         |
| hsa-miR-11400 | NM_003924    | PHOX2B     | 1452  | 1474 | 1            | 1    | 0.29           | 0.43            | 22                        | 7                                        | 3UTR         |
| hsa-miR-11400 | NM_032439    | PHYHIPL    | 2123  | 2145 | 1            | 1    | 2.82           | 1.77            | 22                        | 9                                        | 3UTR         |
| hsa-miR-11400 | NM_016166    | PIAS1      | 3037  | 3050 | 1            | 1    | -0.15          | 0.73            | 13                        | 12                                       | 3UTR         |
| hsa-miR-11400 | NM_001320687 | PIAS1      | 3772  | 3785 | 1            | 1    | -0.15          | 0.73            | 13                        | 12                                       | 3UTR         |
| hsa-miR-11400 | NM_004671    | PIAS2      | 8012  | 8060 | 1            | 1    | -0.04          | 0.01            | 48                        | 8                                        | 3UTR         |
| hsa-miR-11400 | NM_001324060 | PIAS2      | 1289  | 1313 | 1            | 1    | 0.43           | 2.98            | 24                        | 8                                        | 3UTR         |
| hsa-miR-11400 | NM_001289053 | PIGG       | 2586  | 2605 | 0.961538     | 1    | 0.16           | -0.55           | 19                        | 8                                        | 3UTR         |
| hsa-miR-11400 | NM_001289057 | PIGG       | 2046  | 2065 | 0.961538     | 1    | 0.16           | -0.55           | 19                        | 8                                        | 3UTR         |
| hsa-miR-11400 | NM_152671    | PIKFYVE    | 1544  | 1564 | 1            | 1    | -0.08          | 1.69            | 20                        | 8                                        | 3UTR         |
| hsa-miR-11400 | NM_001178000 | PIKFYVE    | 1835  | 1855 | 1            | 1    | -0.08          | 1.69            | 20                        | 8                                        | 3UTR         |
| hsa-miR-11400 | NM_001326411 | PISD       | 2029  | 2074 | 1            | 1    | 1.94           | 3.35            | 18                        | 8                                        | 3UTR         |
| hsa-miR-11400 | NM_001284278 | PITPNB     | 1011  | 1029 | 1            | 1    | 0.54           | 0.81            | 18                        | 8                                        | 3UTR         |
| hsa-miR-11400 | NM_004764    | PIWIL1     | 2861  | 2881 | 1            | 1    | -1.09          | 1.36            | 20                        | 9                                        | 3UTR         |
| hsa-miR-11400 | NM_001255975 | PIWIL3     | 3251  | 3299 | 1            | 1    | -0.11          | -0.17           | 21                        | 9                                        | 3UTR         |

| mirnaid       | refseqid     | genesymbol | start | end  | binding<br>p | seed | phylopste<br>m | phylopflan<br>k | binding_region_lengt<br>h | longest_<br>consecut<br>ive_pairi<br>ngs | positio<br>n |
|---------------|--------------|------------|-------|------|--------------|------|----------------|-----------------|---------------------------|------------------------------------------|--------------|
| hsa-miR-11400 | NM_001008496 | PIWIL3     | 3278  | 3326 | 1            | 1    | -0.11          | -0.17           | 21                        | 9                                        | 3UTR         |
| hsa-miR-11400 | NM_181839    | PKIA       | 1026  | 1062 | 1            | 1    | 0.77           | 1.02            | 36                        | 9                                        | 3UTR         |
| hsa-miR-11400 | NM_006823    | PKIA       | 1155  | 1191 | 1            | 1    | 0.77           | 1.02            | 36                        | 9                                        | 3UTR         |
| hsa-miR-11400 | NM_004572    | PKP2       | 2881  | 2899 | 0.974359     | 1    | 0.10           | 0.29            | 18                        | 11                                       | 3UTR         |
| hsa-miR-11400 | NM_001271814 | PLA2G2D    | 1408  | 1428 |              | 1    | -0.80          | -0.44           | 20                        | 16                                       | 3UTR         |
| hsa-miR-11400 | NM_012400    | PLA2G2D    | 1515  | 1535 | 1            | 1    | -0.66          | -0.66           | 20                        | 16                                       | 3UTR         |
| hsa-miR-11400 | NM_014589    | PLA2G2E    | 620   | 653  | 1            | 1    | 1.21           | 1.73            | 33                        | 8                                        | 3UTR         |
| hsa-miR-11400 | NM_213600    | PLA2G4F    | 3011  | 3031 | 1            | 1    | 3.15           | 1.30            | 20                        | 8                                        | 3UTR         |
| hsa-miR-11400 | XM_005245892 | PLA2G5     | 1060  | 1082 | 1            | 1    | 0.00           | 0.00            | 22                        | 8                                        | 3UTR         |
| hsa-miR-11400 | NM_007366    | PLA2R1     | 5987  | 6009 | 1            | 1    | 0.49           | 0.15            | 22                        | 10                                       | 3UTR         |
| hsa-miR-11400 | XM_011527029 | PLAUR      | 1045  | 1064 | 1            | 1    | 0.00           | 0.00            | 19                        | 10                                       | 3UTR         |
| hsa-miR-11400 | NM_015184    | PLCL2      | 3812  | 3832 | 1            | 1    | 0.28           | 0.56            | 20                        | 13                                       | 3UTR         |
| hsa-miR-11400 | NM_019091    | PLEKHA3    | 9480  | 9499 | 1            | 1    | 0.02           | 0.18            | 19                        | 11                                       | 3UTR         |
| hsa-miR-11400 | NM_001037671 | PLEKHG7    | 1153  | 1175 | 1            | 1    | -0.02          | 0.16            | 22                        | 12                                       | 3UTR         |
| hsa-miR-11400 | NM_001178097 | PLEKHG7    | 1664  | 1686 | 1            | 1    | 0.55           | 0.63            | 22                        | 12                                       | 3UTR         |
| hsa-miR-11400 | NM_020715    | PLEKHH1    | 4603  | 4621 | 1            | 1    | -0.15          | 0.10            | 18                        | 14                                       | 3UTR         |
| hsa-miR-11400 | NM_000301    | PLG        | 2855  | 2874 | 1            | 1    | -0.10          | -0.44           | 19                        | 8                                        | 3UTR         |

| mirnaid       | refseqid     | genesymbol | start | end   | binding<br>p | seed | phylopste<br>m | phylopflan<br>k | binding_region_lengt<br>h | longest_<br>consecut<br>ive_pairi<br>ngs | positio<br>n |
|---------------|--------------|------------|-------|-------|--------------|------|----------------|-----------------|---------------------------|------------------------------------------|--------------|
| hsa-miR-11400 | NM_005817    | PLIN3      | 1901  | 1924  | 1            | 1    | 2.36           | 1.56            | 23                        | 8                                        | 3UTR         |
| hsa-miR-11400 | NM_001164189 | PLIN3      | 1898  | 1921  | 1            | 1    | 2.36           | 1.56            | 23                        | 8                                        | 3UTR         |
| hsa-miR-11400 | NM_001164194 | PLIN3      | 1865  | 1888  | 1            | 1    | 2.36           | 1.56            | 23                        | 8                                        | 3UTR         |
| hsa-miR-11400 | NM_020353    | PLSCR4     | 2300  | 2329  | 1            | 1    | 3.67           | 1.25            | 29                        | 8                                        | 3UTR         |
| hsa-miR-11400 | NM_001128304 | PLSCR4     | 2426  | 2455  | 1            | 1    | 4.10           | 2.39            | 29                        | 8                                        | 3UTR         |
| hsa-miR-11400 | NM_001128305 | PLSCR4     | 2213  | 2242  | 1            | 1    | 0.26           | 2.15            | 29                        | 8                                        | 3UTR         |
| hsa-miR-11400 | XM_005250686 | PLXNA4     | 12756 | 12780 | 1            | 1    | 0.00           | 0.00            | 24                        | 11                                       | 3UTR         |
| hsa-miR-11400 | NM_199169    | PMEPA1     | 4205  | 4224  | 1            | 1    | 0.39           | 3.16            | 19                        | 8                                        | 3UTR         |
| hsa-miR-11400 | NM_199171    | PMEPA1     | 4236  | 4255  | 1            | 1    | 4.79           | 2.67            | 19                        | 8                                        | 3UTR         |
| hsa-miR-11400 | NM_015488    | PNKD       | 1649  | 1669  | 1            | 1    | -0.08          | 0.05            | 20                        | 8                                        | 3UTR         |
| hsa-miR-11400 | NM_022572    | PNKD       | 1649  | 1669  | 1            | 1    | -0.08          | 0.05            | 20                        | 8                                        | 3UTR         |
| hsa-miR-11400 | NM_007257    | PNMA2      | 2917  | 2965  | 1            | 1    | 0.40           | -0.29           | 17                        | 7                                        | 3UTR         |
| hsa-miR-11400 | XM_017001691 | PNRC2      | 1134  | 1175  | 1            | 1    | 0.00           | 0.00            | 15                        | 7                                        | 3UTR         |
| hsa-miR-11400 | NM_017761    | PNRC2      | 1239  | 1253  | 1            | 1    | 0.93           | 0.08            | 14                        | 7                                        | 3UTR         |
| hsa-miR-11400 | NM_001146254 | PODNL1     | 2889  | 2911  | 1            | 1    | 0.26           | 0.60            | 22                        | 10                                       | 3UTR         |
| hsa-miR-11400 | NM_001146255 | PODNL1     | 2622  | 2644  | 1            | 1    | 0.26           | 0.60            | 22                        | 10                                       | 3UTR         |
| hsa-miR-11400 | NM_153705    | POGLUT3    | 2130  | 2150  | 0.961538     | 1    | -0.06          | 0.31            | 20                        | 15                                       | 3UTR         |

| mirnaid       | refseqid     | genesymbol | start | end  | binding<br>p | seed | phylopste<br>m | phylopflan<br>k | binding_region_lengt<br>h | longest_<br>consecut<br>ive_pairi<br>ngs | positio<br>n |
|---------------|--------------|------------|-------|------|--------------|------|----------------|-----------------|---------------------------|------------------------------------------|--------------|
| hsa-miR-11400 | XM_011542621 | POGLUT3    | 2151  | 2171 | 1            | 1    | 0.00           | 0.00            | 20                        | 15                                       | 3UTR         |
| hsa-miR-11400 | NM_007195    | POLI       | 5788  | 5803 | 1            | 1    | -0.07          | 0.11            | 15                        | 14                                       | 3UTR         |
| hsa-miR-11400 | NM_001351613 | POLI       | 5571  | 5604 | 1            | 1    | -0.07          | 0.16            | 16                        | 14                                       | 3UTR         |
| hsa-miR-11400 | NM_001351615 | POLI       | 5976  | 5991 | 1            | 1    | -0.07          | 0.11            | 15                        | 14                                       | 3UTR         |
| hsa-miR-11400 | XM_006717777 | POLL       | 2164  | 2187 | 1            | 1    | 0.00           | 0.00            | 21                        | 7                                        | 3UTR         |
| hsa-miR-11400 | XM_011539651 | POLL       | 2203  | 2226 | 1            | 1    | 0.00           | 0.00            | 21                        | 7                                        | 3UTR         |
| hsa-miR-11400 | XM_011539654 | POLL       | 1948  | 1971 | 1            | 1    | 0.00           | 0.00            | 21                        | 7                                        | 3UTR         |
| hsa-miR-11400 | XM_024447943 | POLL       | 2443  | 2466 | 1            | 1    | 0.00           | 0.00            | 21                        | 7                                        | 3UTR         |
| hsa-miR-11400 | NM_001282774 | POLR1B     | 5420  | 5443 | 1            | 1    | 0.59           | 0.01            | 18                        | 10                                       | 3UTR         |
| hsa-miR-11400 | NM_001002926 | POLR1F     | 2029  | 2049 | 1            | 1    | 0.15           | 0.12            | 20                        | 10                                       | 3UTR         |
| hsa-miR-11400 | NM_005034    | POLR2K     | 371   | 391  | 1            | 1    | 0.03           | 0.45            | 20                        | 10                                       | 3UTR         |
| hsa-miR-11400 | NM_001722    | POLR3D     | 3038  | 3056 | 1            | 1    | -0.52          | -0.05           | 18                        | 11                                       | 3UTR         |
| hsa-miR-11400 | NM_001137671 | POTEC      | 3318  | 3352 | 1            | 1    | 0.00           | 0.00            | 21                        | 10                                       | 3UTR         |
| hsa-miR-11400 | NM_174981    | POTED      | 3308  | 3342 | 1            | 1    | -0.12          | -0.13           | 21                        | 10                                       | 3UTR         |
| hsa-miR-11400 | NM_001145442 | POTEM      | 6024  | 6045 | 1            | 1    | -0.07          | -0.06           | 21                        | 9                                        | 3UTR         |
| hsa-miR-11400 | NM_001173531 | POU5F1     | 1556  | 1577 | 1            | 1    | 0.17           | -0.07           | 21                        | 7                                        | 3UTR         |
| hsa-miR-11400 | NM_001354828 | PPARGC1A   | 1720  | 1744 | 1            | 1    | 0.05           | 0.74            | 24                        | 12                                       | 3UTR         |

| mirnaid       | refseqid     | genesymbol | start | end  | binding<br>p | seed | phylopste<br>m | phylopflan<br>k | binding_region_lengt<br>h | longest_<br>consecut<br>ive_pairi<br>ngs | positio<br>n |
|---------------|--------------|------------|-------|------|--------------|------|----------------|-----------------|---------------------------|------------------------------------------|--------------|
| hsa-miR-11400 | NM_001368128 | PPIAL4H    | 1289  | 1323 | 1            | 1    | -0.22          | -0.08           | 24                        | 9                                        | 3UTR         |
| hsa-miR-11400 | NM_001286360 | PPIL6      | 2080  | 2096 | 1            | 1    | -0.15          | 0.04            | 16                        | 9                                        | 3UTR         |
| hsa-miR-11400 | NM_001286361 | PPIL6      | 1944  | 1960 | 1            | 1    | 0.09           | -0.06           | 16                        | 9                                        | 3UTR         |
| hsa-miR-11400 | NM_173672    | PPIL6      | 1622  | 1649 | 1            | 1    | -0.35          | 0.09            | 17                        | 9                                        | 3UTR         |
| hsa-miR-11400 | NM_001111298 | PPIL6      | 2254  | 2270 | 1            | 1    | 0.19           | 0.10            | 16                        | 9                                        | 3UTR         |
| hsa-miR-11400 | NM_177952    | PPM1A      | 1839  | 1860 | 1            | 1    | 2.42           | 2.99            | 21                        | 12                                       | 3UTR         |
| hsa-miR-11400 | NM_021003    | PPM1A      | 1999  | 2020 | 1            | 1    | 2.42           | 2.99            | 21                        | 12                                       | 3UTR         |
| hsa-miR-11400 | NM_003620    | PPM1D      | 4285  | 4303 | 1            | 1    | -0.08          | 0.06            | 18                        | 8                                        | 3UTR         |
| hsa-miR-11400 | NM_014906    | PPM1E      | 5710  | 5736 | 1            | 1    | 1.41           | 1.46            | 26                        | 11                                       | 3UTR         |
| hsa-miR-11400 | NM_001271593 | PPME1      | 2237  | 2257 | 1            | 1    | 0.85           | 0.76            | 20                        | 7                                        | 3UTR         |
| hsa-miR-11400 | NM_016147    | PPME1      | 2195  | 2215 | 1            | 1    | 0.85           | 0.76            | 20                        | 7                                        | 3UTR         |
| hsa-miR-11400 | NM_001242464 | PPP1R1B    | 992   | 1011 | 1            | 1    | 2.70           | 2.61            | 19                        | 7                                        | 3UTR         |
| hsa-miR-11400 | NM_033215    | PPP1R3F    | 2510  | 2524 | 1            | 1    | 0.10           | 1.17            | 14                        | 13                                       | 3UTR         |
| hsa-miR-11400 | NM_001184745 | PPP1R3F    | 1834  | 1870 | 1            | 1    | 3.08           | 2.62            | 28                        | 9                                        | 3UTR         |
| hsa-miR-11400 | NM_001184745 | PPP1R3F    | 1552  | 1581 | 1            | 1    | 1.13           | 1.24            | 15                        | 13                                       | 3UTR         |
| hsa-miR-11400 | NM_001271948 | PPP2R2B    | 5710  | 5741 | 1            | 1    | 0.00           | 0.00            | 31                        | 8                                        | 3UTR         |
| hsa-miR-11400 | NM_181674    | PPP2R2B    | 5360  | 5391 | 1            | 1    | 0.00           | 0.00            | 31                        | 8                                        | 3UTR         |

| mirnaid       | refseqid     | genesymbol | start | end  | binding<br>p | seed | phylopste<br>m | phylopflan<br>k | binding_region_lengt<br>h | longest_<br>consecut<br>ive_pairi<br>ngs | positio<br>n |
|---------------|--------------|------------|-------|------|--------------|------|----------------|-----------------|---------------------------|------------------------------------------|--------------|
| hsa-miR-11400 | NM_181675    | PPP2R2B    | 5230  | 5261 | 1            | 1    | 0.03           | -0.06           | 31                        | 8                                        | 3UTR         |
| hsa-miR-11400 | NM_181676    | PPP2R2B    | 5166  | 5197 | 1            | 1    | 0.00           | 0.00            | 31                        | 8                                        | 3UTR         |
| hsa-miR-11400 | NM_001199756 | PPP2R5A    | 2313  | 2346 | 1            | 1    | 4.89           | 3.27            | 33                        | 8                                        | 3UTR         |
| hsa-miR-11400 | NM_002721    | PPP6C      | 2743  | 2778 | 1            | 1    | 1.30           | 1.94            | 19                        | 17                                       | 3UTR         |
| hsa-miR-11400 | NM_001123355 | PPP6C      | 2854  | 2889 | 1            | 1    | 1.93           | 1.70            | 19                        | 17                                       | 3UTR         |
| hsa-miR-11400 | NM_001291380 | PRAMEF13   | 1849  | 1870 | 1            | 1    | 0.00           | 0.00            | 21                        | 9                                        | 3UTR         |
| hsa-miR-11400 | NM_004905    | PRDX6      | 1292  | 1312 | 1            | 1    | 0.38           | 0.07            | 20                        | 12                                       | 3UTR         |
| hsa-miR-11400 | XM_017005384 | PREPL      | 4002  | 4019 | 1            | 1    | 0.00           | 0.00            | 17                        | 16                                       | 3UTR         |
| hsa-miR-11400 | NM_001374276 | PREPL      | 3053  | 3070 | 1            | 1    | -0.71          | 0.52            | 17                        | 16                                       | 3UTR         |
| hsa-miR-11400 | NM_001171603 | PREPL      | 3277  | 3294 | 1            | 1    | 0.27           | 0.33            | 17                        | 16                                       | 3UTR         |
| hsa-miR-11400 | NM_001171606 | PREPL      | 3341  | 3358 | 1            | 1    | 0.34           | 0.31            | 17                        | 16                                       | 3UTR         |
| hsa-miR-11400 | NM_001110213 | PRH2       | 2185  | 2215 | 1            | 1    | -0.31          | -0.11           | 15                        | 13                                       | 3UTR         |
| hsa-miR-11400 | XM_024449482 | PRIMA1     | 910   | 926  | 1            | 1    | 0.00           | 0.00            | 16                        | 10                                       | 3UTR         |
| hsa-miR-11400 | NM_006252    | PRKAA2     | 6798  | 6821 | 1            | 1    | 0.02           | 0.05            | 23                        | 8                                        | 3UTR         |
| hsa-miR-11400 | NM_006252    | PRKAA2     | 9268  | 9290 | 1            | 1    | 0.30           | 0.53            | 22                        | 6                                        | 3UTR         |
| hsa-miR-11400 | XM_017004343 | PRKAG3     | 2960  | 2983 | 1            | 1    | 0.00           | 0.00            | 23                        | 7                                        | 3UTR         |
| hsa-miR-11400 | NM_004157    | PRKAR2A    | 4374  | 4392 | 1            | 1    | -0.05          | 0.12            | 18                        | 17                                       | 3UTR         |

| mirnaid       | refseqid     | genesymbol | start | end   | binding<br>p | seed | phylopste<br>m | phylopflan<br>k | binding_region_lengt<br>h | longest_<br>consecut<br>ive_pairi<br>ngs | positio<br>n |
|---------------|--------------|------------|-------|-------|--------------|------|----------------|-----------------|---------------------------|------------------------------------------|--------------|
| hsa-miR-11400 | NM_001321983 | PRKAR2A    | 4308  | 4326  | 1            | 1    | 0.15           | 0.32            | 18                        | 17                                       | 3UTR         |
| hsa-miR-11400 | NM_024653    | PRKRIP1    | 2113  | 2131  | 1            | 1    | -0.01          | 0.00            | 18                        | 10                                       | 3UTR         |
| hsa-miR-11400 | NM_006017    | PROM1      | 3450  | 3493  | 1            | 1    | 3.02           | 1.86            | 43                        | 10                                       | 3UTR         |
| hsa-miR-11400 | NM_001145848 | PROM1      | 3423  | 3466  | 1            | 1    | 1.01           | 2.39            | 43                        | 10                                       | 3UTR         |
| hsa-miR-11400 | NM_001145849 | PROM1      | 3335  | 3378  | 1            | 1    | 2.93           | 3.33            | 43                        | 10                                       | 3UTR         |
| hsa-miR-11400 | NM_144707    | PROM2      | 3082  | 3105  | 1            | 1    | -0.09          | -0.12           | 23                        | 7                                        | 3UTR         |
| hsa-miR-11400 | NM_001165978 | PROM2      | 3991  | 4014  | 1            | 1    | -0.09          | -0.12           | 23                        | 7                                        | 3UTR         |
| hsa-miR-11400 | NM_001039887 | PROSER3    | 3741  | 3761  | 1            | 1    | 0.32           | 0.11            | 20                        | 14                                       | 3UTR         |
| hsa-miR-11400 | NM_001243007 | PROX2      | 3393  | 3425  | 1            | 1    | 0.00           | 0.00            | 21                        | 10                                       | 3UTR         |
| hsa-miR-11400 | NM_032864    | PRPF38A    | 4078  | 4099  | 1            | 1    | 0.38           | -0.10           | 21                        | 9                                        | 3UTR         |
| hsa-miR-11400 | NM_032864    | PRPF38A    | 2969  | 2994  | 1            | 1    | 0.10           | -0.24           | 25                        | 7                                        | 3UTR         |
| hsa-miR-11400 | NM_017922    | PRPF39     | 3223  | 3245  | 1            | 1    | 1.14           | 0.72            | 22                        | 10                                       | 3UTR         |
| hsa-miR-11400 | NM_018304    | PRR11      | 5142  | 5167  | 1            | 1    | -0.46          | -0.04           | 25                        | 8                                        | 3UTR         |
| hsa-miR-11400 | NM_024320    | PRR15L     | 923   | 943   | 1            | 1    | -0.11          | 0.62            | 20                        | 9                                        | 3UTR         |
| hsa-miR-11400 | NM_001134659 | PRR23A     | 1698  | 1723  | 1            | 1    | -0.30          | -0.57           | 25                        | 8                                        | 3UTR         |
| hsa-miR-11400 | NM_145270    | PRR35      | 2181  | 2201  | 1            | 1    | -0.41          | -0.39           | 20                        | 13                                       | 3UTR         |
| hsa-miR-11400 | NM_001384818 | PRRC2B     | 10277 | 10313 | 1            | 1    | -0.79          | -0.14           | 20                        | 12                                       | 3UTR         |

| mirnaid       | refseqid     | genesymbol | start | end  | binding<br>p | seed | phylopste<br>m | phylopflan<br>k | binding_region_lengt<br>h | longest_<br>consecut<br>ive_pairi<br>ngs | positio<br>n |
|---------------|--------------|------------|-------|------|--------------|------|----------------|-----------------|---------------------------|------------------------------------------|--------------|
| hsa-miR-11400 | NM_001384823 | PRRC2B     | 8113  | 8149 | 1            | 1    | -0.79          | -0.14           | 20                        | 12                                       | 3UTR         |
| hsa-miR-11400 | NM_007173    | PRSS23     | 2924  | 2956 | 1            | 1    | 0.07           | -0.08           | 21                        | 9                                        | 3UTR         |
| hsa-miR-11400 | NM_032333    | PRXL2A     | 3442  | 3462 | 1            | 1    | 0.42           | 0.11            | 20                        | 8                                        | 3UTR         |
| hsa-miR-11400 | NM_001243778 | PRXL2A     | 3393  | 3413 | 1            | 1    | 0.00           | 0.00            | 20                        | 8                                        | 3UTR         |
| hsa-miR-11400 | NM_001243779 | PRXL2A     | 3477  | 3497 | 1            | 1    | 0.00           | 0.00            | 20                        | 8                                        | 3UTR         |
| hsa-miR-11400 | NM_001243781 | PRXL2A     | 3425  | 3445 | 1            | 1    | 0.42           | 0.11            | 20                        | 8                                        | 3UTR         |
| hsa-miR-11400 | NM_001085382 | PSAPL1     | 4152  | 4170 | 1            | 1    | -0.07          | -0.29           | 18                        | 13                                       | 3UTR         |
| hsa-miR-11400 | NM_001330524 | PSG1       | 1594  | 1611 | 1            | 1    | 0.57           | 0.16            | 17                        | 12                                       | 3UTR         |
| hsa-miR-11400 | NM_001184825 | PSG1       | 1873  | 1890 | 1            | 1    | 0.57           | 0.16            | 17                        | 12                                       | 3UTR         |
| hsa-miR-11400 | NM_001184826 | PSG1       | 1787  | 1804 | 1            | 1    | 0.57           | 0.16            | 17                        | 12                                       | 3UTR         |
| hsa-miR-11400 | NM_001206650 | PSG7       | 1511  | 1528 | 1            | 1    | 0.00           | 0.00            | 17                        | 12                                       | 3UTR         |
| hsa-miR-11400 | XM_011526987 | PSG8       | 1632  | 1649 | 1            | 1    | 0.00           | 0.00            | 17                        | 12                                       | 3UTR         |
| hsa-miR-11400 | NM_001130167 | PSG8       | 1837  | 1854 | 1            | 1    | -0.19          | -0.01           | 17                        | 12                                       | 3UTR         |
| hsa-miR-11400 | NM_001130168 | PSG8       | 1471  | 1488 | 1            | 1    | 0.34           | -0.04           | 17                        | 12                                       | 3UTR         |
| hsa-miR-11400 | XM_005259075 | PSG9       | 1797  | 1821 | 1            | 1    | 0.00           | 0.00            | 24                        | 6                                        | 3UTR         |
| hsa-miR-11400 | XM_017027006 | PSG9       | 1518  | 1542 | 1            | 1    | 0.00           | 0.00            | 24                        | 6                                        | 3UTR         |
| hsa-miR-11400 | NM_153001    | PSMC4      | 1415  | 1444 | 1            | 1    | 0.36           | 0.29            | 21                        | 13                                       | 3UTR         |



| mirnaid       | refseqid     | genesymbol | start | end  | binding<br>p | seed | phylopste<br>m | phylopflan<br>k | binding_region_lengt<br>h | longest_<br>consecut<br>ive_pairi<br>ngs | positio<br>n |
|---------------|--------------|------------|-------|------|--------------|------|----------------|-----------------|---------------------------|------------------------------------------|--------------|
| hsa-miR-11400 | NM_006503    | PSMC4      | 1508  | 1537 | 1            | 1    | 0.13           | 0.21            | 21                        | 13                                       | 3UTR         |
| hsa-miR-11400 | NM_024946    | PSME3IP1   | 2308  | 2326 | 1            | 1    | 4.89           | 4.50            | 18                        | 9                                        | 3UTR         |
| hsa-miR-11400 | NM_001354080 | PSME3IP1   | 2526  | 2544 | 1            | 1    | 3.92           | 4.28            | 18                        | 9                                        | 3UTR         |
| hsa-miR-11400 | NM_001354083 | PSME3IP1   | 2304  | 2322 | 1            | 1    | 3.97           | 4.47            | 18                        | 9                                        | 3UTR         |
| hsa-miR-11400 | NM_178578    | PSMF1      | 3003  | 3023 | 1            | 1    | -0.55          | 0.29            | 20                        | 8                                        | 3UTR         |
| hsa-miR-11400 | NM_006814    | PSMF1      | 3007  | 3027 | 1            | 1    | -0.41          | 0.27            | 20                        | 8                                        | 3UTR         |
| hsa-miR-11400 | NM_001323408 | PSMF1      | 1809  | 1829 | 1            | 1    | -0.41          | 0.27            | 20                        | 8                                        | 3UTR         |
| hsa-miR-11400 | NM_024430    | PSTPIP2    | 1396  | 1414 | 1            | 1    | 0.53           | 0.28            | 18                        | 14                                       | 3UTR         |
| hsa-miR-11400 | NM_001300985 | PTBP2      | 9275  | 9299 | 1            | 1    | 0.18           | -0.13           | 24                        | 9                                        | 3UTR         |
| hsa-miR-11400 | NM_001300986 | PTBP2      | 9284  | 9308 | 1            | 1    | 0.18           | -0.13           | 24                        | 9                                        | 3UTR         |
| hsa-miR-11400 | NM_001300989 | PTBP2      | 9260  | 9284 | 1            | 1    | 0.18           | -0.13           | 24                        | 9                                        | 3UTR         |
| hsa-miR-11400 | NM_001284403 | PTCD2      | 9050  | 9068 | 1            | 1    | 0.05           | 0.14            | 18                        | 8                                        | 3UTR         |
| hsa-miR-11400 | NM_001284404 | PTCD2      | 9180  | 9198 | 1            | 1    | 0.00           | 0.00            | 18                        | 8                                        | 3UTR         |
| hsa-miR-11400 | NM_001284405 | PTCD2      | 9298  | 9316 | 1            | 1    | 0.00           | 0.00            | 18                        | 8                                        | 3UTR         |
| hsa-miR-11400 | NM_024754    | PTCD2      | 9377  | 9395 | 1            | 1    | 0.05           | 0.14            | 18                        | 8                                        | 3UTR         |
| hsa-miR-11400 | NM_173495    | PTCHD1     | 3891  | 3910 | 0.961538     | 1    | 0.85           | 0.24            | 19                        | 7                                        | 3UTR         |
| hsa-miR-11400 | NM_173495    | PTCHD1     | 4710  | 4744 | 1            | 1    | 1.05           | 1.13            | 34                        | 10                                       | 3UTR         |

| mirnaid       | refseqid     | genesymbol | start | end   | binding<br>p | seed | phylopste<br>m | phylopflan<br>k | binding_region_lengt<br>h | longest_<br>consecut<br>ive_pairi<br>ngs | positio<br>n |
|---------------|--------------|------------|-------|-------|--------------|------|----------------|-----------------|---------------------------|------------------------------------------|--------------|
| hsa-miR-11400 | NM_001013732 | PTCHD4     | 19531 | 19549 | 1            | 1    | 1.56           | 0.18            | 18                        | 10                                       | 3UTR         |
| hsa-miR-11400 | NM_001013732 | PTCHD4     | 2755  | 2773  | 1            | 1    | -0.22          | 0.05            | 18                        | 6                                        | 3UTR         |
| hsa-miR-11400 | NM_001261836 | PTER       | 3235  | 3250  | 1            | 1    | 0.86           | 0.29            | 15                        | 9                                        | 3UTR         |
| hsa-miR-11400 | NM_001261838 | PTER       | 2755  | 2770  | 1            | 1    | 0.86           | 0.29            | 15                        | 9                                        | 3UTR         |
| hsa-miR-11400 | XM_017016930 | PTER       | 3131  | 3146  | 1            | 1    | 0.00           | 0.00            | 15                        | 9                                        | 3UTR         |
| hsa-miR-11400 | NM_001001484 | PTER       | 3369  | 3384  | 1            | 1    | 0.86           | 0.29            | 15                        | 9                                        | 3UTR         |
| hsa-miR-11400 | NM_198715    | PTGER3     | 4726  | 4748  | 1            | 1    | -0.06          | -0.10           | 22                        | 10                                       | 3UTR         |
| hsa-miR-11400 | NM_173174    | PTK2B      | 4487  | 4507  | 1            | 1    | 0.07           | -0.05           | 20                        | 8                                        | 3UTR         |
| hsa-miR-11400 | NM_173175    | PTK2B      | 3704  | 3724  | 1            | 1    | 0.07           | -0.05           | 20                        | 8                                        | 3UTR         |
| hsa-miR-11400 | NM_173176    | PTK2B      | 3842  | 3862  | 1            | 1    | 0.07           | -0.05           | 20                        | 8                                        | 3UTR         |
| hsa-miR-11400 | NM_152880    | PTK7       | 3744  | 3760  | 1            | 1    | -0.58          | 0.04            | 16                        | 15                                       | 3UTR         |
| hsa-miR-11400 | NM_152881    | PTK7       | 3474  | 3490  | 1            | 1    | -0.58          | 0.04            | 16                        | 15                                       | 3UTR         |
| hsa-miR-11400 | NM_152882    | PTK7       | 3696  | 3712  | 1            | 1    | -0.58          | 0.04            | 16                        | 15                                       | 3UTR         |
| hsa-miR-11400 | NM_002821    | PTK7       | 3864  | 3880  | 1            | 1    | -0.58          | 0.04            | 16                        | 15                                       | 3UTR         |
| hsa-miR-11400 | NM_080391    | PTP4A2     | 3810  | 3852  | 1            | 1    | 0.77           | 0.86            | 42                        | 10                                       | 3UTR         |
| hsa-miR-11400 | NM_001369859 | PTP4A2     | 3702  | 3744  | 1            | 1    | 0.13           | 0.15            | 42                        | 10                                       | 3UTR         |
| hsa-miR-11400 | NM_001195100 | PTP4A2     | 3735  | 3777  | 1            | 1    | 0.77           | 0.86            | 42                        | 10                                       | 3UTR         |

| mirnaid       | refseqid     | genesymbol | start | end   | binding<br>p | seed | phylopste<br>m | phylopflan<br>k | binding_region_lengt<br>h | longest_<br>consecut<br>ive_pairi<br>ngs | positio<br>n |
|---------------|--------------|------------|-------|-------|--------------|------|----------------|-----------------|---------------------------|------------------------------------------|--------------|
| hsa-miR-11400 | XM_017001936 | PTPN7      | 2450  | 2470  | 1            | 1    | 0.00           | 0.00            | 20                        | 11                                       | 3UTR         |
| hsa-miR-11400 | NM_001199797 | PTPN7      | 2272  | 2292  | 1            | 1    | 0.00           | 0.00            | 20                        | 11                                       | 3UTR         |
| hsa-miR-11400 | NM_130435    | PTPRE      | 4206  | 4227  | 1            | 1    | -0.50          | -0.63           | 21                        | 7                                        | 3UTR         |
| hsa-miR-11400 | NM_002840    | PTPRF      | 6180  | 6196  | 0.961538     | 1    | 1.70           | 1.63            | 16                        | 15                                       | 3UTR         |
| hsa-miR-11400 | NM_130440    | PTPRF      | 6153  | 6169  | 1            | 1    | 1.46           | 2.14            | 16                        | 15                                       | 3UTR         |
| hsa-miR-11400 | NM_130440    | PTPRF      | 7439  | 7462  | 1            | 1    | 1.54           | 1.60            | 23                        | 12                                       | 3UTR         |
| hsa-miR-11400 | NM_002840    | PTPRF      | 7466  | 7489  | 1            | 1    | 2.38           | 1.12            | 23                        | 12                                       | 3UTR         |
| hsa-miR-11400 | NM_001199763 | PTPRN      | 3123  | 3149  | 1            | 1    | 0.00           | 0.00            | 20                        | 11                                       | 3UTR         |
| hsa-miR-11400 | NM_001145026 | PTPRQ      | 7551  | 7575  | 1            | 1    | 2.81           | 3.06            | 24                        | 8                                        | 3UTR         |
| hsa-miR-11400 | NM_002849    | PTPRR      | 2543  | 2578  | 1            | 1    | 1.96           | 3.59            | 35                        | 8                                        | 3UTR         |
| hsa-miR-11400 | NM_001271826 | PUS7L      | 9815  | 9843  | 0.980769     | 1    | 0.28           | 0.06            | 20                        | 12                                       | 3UTR         |
| hsa-miR-11400 | NM_031292    | PUS7L      | 10741 | 10769 | 0.980769     | 1    | 0.41           | 0.05            | 20                        | 12                                       | 3UTR         |
| hsa-miR-11400 | NM_001098614 | PUS7L      | 10770 | 10798 | 0.980769     | 1    | -0.11          | 0.08            | 20                        | 12                                       | 3UTR         |
| hsa-miR-11400 | NM_006505    | PVR        | 1717  | 1731  | 1            | 1    | -1.09          | -0.74           | 14                        | 13                                       | 3UTR         |
| hsa-miR-11400 | NM_001135768 | PVR        | 1582  | 1596  | 1            | 1    | -1.09          | -0.74           | 14                        | 13                                       | 3UTR         |
| hsa-miR-11400 | NM_001135769 | PVR        | 1558  | 1572  | 1            | 1    | -1.09          | -0.74           | 14                        | 13                                       | 3UTR         |
| hsa-miR-11400 | NM_052927    | PWWP2A     | 1778  | 1799  | 1            | 1    | 0.48           | 0.61            | 21                        | 14                                       | 3UTR         |

| mirnaid       | refseqid     | genesymbol | start | end  | binding<br>p | seed | phylopste<br>m | phylopflan<br>k | binding_region_lengt<br>h | longest_<br>consecut<br>ive_pairi<br>ngs | positio<br>n |
|---------------|--------------|------------|-------|------|--------------|------|----------------|-----------------|---------------------------|------------------------------------------|--------------|
| hsa-miR-11400 | NM_001130864 | PWWP2A     | 2579  | 2598 | 1            | 1    | 2.03           | 2.33            | 19                        | 9                                        | 3UTR         |
| hsa-miR-11400 | NM_007238    | PXMP4      | 2571  | 2594 | 1            | 1    | -0.11          | -0.16           | 23                        | 7                                        | 3UTR         |
| hsa-miR-11400 | NM_002862    | PYGB       | 3888  | 3906 | 1            | 1    | -0.45          | -0.24           | 18                        | 11                                       | 3UTR         |
| hsa-miR-11400 | NM_198880    | QRICH1     | 2526  | 2546 | 1            | 1    | 2.88           | 3.55            | 20                        | 7                                        | 3UTR         |
| hsa-miR-11400 | NM_017730    | QRICH1     | 2586  | 2606 | 1            | 1    | 2.98           | 3.20            | 20                        | 7                                        | 3UTR         |
| hsa-miR-11400 | NM_001320580 | QRICH1     | 2782  | 2802 | 1            | 1    | 3.68           | 3.82            | 20                        | 7                                        | 3UTR         |
| hsa-miR-11400 | NM_001076786 | QSER1      | 8331  | 8352 | 1            | 1    | 0.31           | 0.26            | 21                        | 11                                       | 3UTR         |
| hsa-miR-11400 | NM_001076786 | QSER1      | 7706  | 7729 | 1            | 1    | 0.39           | 0.57            | 23                        | 9                                        | 3UTR         |
| hsa-miR-11400 | NM_001256835 | QTRT2      | 1671  | 1702 | 1            | 1    | 0.19           | 0.24            | 19                        | 12                                       | 3UTR         |
| hsa-miR-11400 | NM_001256836 | QTRT2      | 1317  | 1348 | 1            | 1    | 0.19           | 0.24            | 19                        | 12                                       | 3UTR         |
| hsa-miR-11400 | NM_001256837 | QTRT2      | 1415  | 1446 | 1            | 1    | 0.19           | 0.24            | 19                        | 12                                       | 3UTR         |
| hsa-miR-11400 | NM_024638    | QTRT2      | 1779  | 1810 | 1            | 1    | 0.19           | 0.24            | 19                        | 12                                       | 3UTR         |
| hsa-miR-11400 | NM_004663    | RAB11A     | 3421  | 3435 | 1            | 1    | 0.88           | 0.40            | 14                        | 13                                       | 3UTR         |
| hsa-miR-11400 | NM_004914    | RAB36      | 1666  | 1686 | 1            | 1    | -0.48          | -0.45           | 20                        | 10                                       | 3UTR         |
| hsa-miR-11400 | NM_001349878 | RAB36      | 1799  | 1819 | 1            | 1    | -0.48          | -0.45           | 20                        | 10                                       | 3UTR         |
| hsa-miR-11400 | NM_001330471 | RAB37      | 780   | 799  | 1            | 1    | 0.71           | 0.34            | 19                        | 11                                       | 3UTR         |
| hsa-miR-11400 | NM_001006638 | RAB37      | 718   | 737  | 1            | 1    | 0.71           | 0.34            | 19                        | 11                                       | 3UTR         |

| mirnaid       | refseqid     | genesymbol | start | end  | binding<br>p | seed | phylopste<br>m | phylopflan<br>k | binding_region_lengt<br>h | longest_<br>consecut<br>ive_pairi<br>ngs | positio<br>n |
|---------------|--------------|------------|-------|------|--------------|------|----------------|-----------------|---------------------------|------------------------------------------|--------------|
| hsa-miR-11400 | NM_001163989 | RAB37      | 906   | 925  | 1            | 1    | 0.71           | 0.34            | 19                        | 11                                       | 3UTR         |
| hsa-miR-11400 | NM_001163990 | RAB37      | 607   | 626  | 1            | 1    | 0.71           | 0.34            | 19                        | 11                                       | 3UTR         |
| hsa-miR-11400 | NM_002867    | RAB3B      | 8522  | 8541 | 1            | 1    | 0.17           | 0.28            | 19                        | 7                                        | 3UTR         |
| hsa-miR-11400 | NM_001278402 | RAB3IP     | 6706  | 6731 | 1            | 1    | 0.36           | -0.01           | 25                        | 9                                        | 3UTR         |
| hsa-miR-11400 | NM_175623    | RAB3IP     | 7585  | 7610 | 1            | 1    | 0.36           | -0.01           | 25                        | 9                                        | 3UTR         |
| hsa-miR-11400 | NM_175624    | RAB3IP     | 7168  | 7193 | 1            | 1    | 0.36           | -0.01           | 25                        | 9                                        | 3UTR         |
| hsa-miR-11400 | NM_175625    | RAB3IP     | 7485  | 7510 | 1            | 1    | 0.36           | -0.01           | 25                        | 9                                        | 3UTR         |
| hsa-miR-11400 | NM_022456    | RAB3IP     | 7268  | 7293 | 1            | 1    | 0.36           | -0.01           | 25                        | 9                                        | 3UTR         |
| hsa-miR-11400 | NM_001024647 | RAB3IP     | 6791  | 6816 | 1            | 1    | 0.36           | -0.01           | 25                        | 9                                        | 3UTR         |
| hsa-miR-11400 | NM_006822    | RAB40B     | 3549  | 3566 | 1            | 1    | 3.57           | 2.22            | 17                        | 13                                       | 3UTR         |
| hsa-miR-11400 | NM_001204885 | RAB43      | 2916  | 2935 | 0.969231     | 1    | 0.07           | 0.19            | 19                        | 10                                       | 3UTR         |
| hsa-miR-11400 | NM_001204886 | RAB43      | 2953  | 2972 | 0.969231     | 1    | 0.28           | -0.01           | 19                        | 10                                       | 3UTR         |
| hsa-miR-11400 | NM_001204884 | RAB43      | 2926  | 2945 | 1            | 1    | -0.26          | 0.11            | 19                        | 10                                       | 3UTR         |
| hsa-miR-11400 | NM_001257357 | RAB44      | 3250  | 3268 | 1            | 1    | -0.19          | -0.29           | 18                        | 17                                       | 3UTR         |
| hsa-miR-11400 | NM_016577    | RAB6B      | 2936  | 2955 | 1            | 1    | 0.80           | 0.09            | 19                        | 14                                       | 3UTR         |
| hsa-miR-11400 | NM_001363953 | RAB6B      | 3032  | 3051 | 1            | 1    | 0.32           | -0.13           | 19                        | 14                                       | 3UTR         |
| hsa-miR-11400 | NM_005370    | RAB8A      | 1750  | 1770 | 1            | 1    | 0.23           | -0.08           | 20                        | 7                                        | 3UTR         |

| mirnaid       | refseqid     | genesymbol | start | end  | binding<br>p | seed | phylopste<br>m | phylopflan<br>k | binding_region_lengt<br>h | longest_<br>consecut<br>ive_pairi<br>ngs | positio<br>n |
|---------------|--------------|------------|-------|------|--------------|------|----------------|-----------------|---------------------------|------------------------------------------|--------------|
| hsa-miR-11400 | NM_016370    | RAB9B      | 2578  | 2594 | 1            | 1    | 1.36           | 1.35            | 16                        | 15                                       | 3UTR         |
| hsa-miR-11400 | NM_012197    | RABGAP1    | 4374  | 4394 | 1            | 1    | 0.21           | 0.39            | 20                        | 14                                       | 3UTR         |
| hsa-miR-11400 | XM_017002996 | RABGAP1L   | 3483  | 3504 | 1            | 1    | 0.00           | 0.00            | 21                        | 14                                       | 3UTR         |
| hsa-miR-11400 | NM_001306161 | RABL2A     | 840   | 861  | 1            | 1    | -0.25          | -0.48           | 21                        | 12                                       | 3UTR         |
| hsa-miR-11400 | NM_013412    | RABL2A     | 1025  | 1046 | 1            | 1    | -0.25          | -0.48           | 21                        | 12                                       | 3UTR         |
| hsa-miR-11400 | NM_001354410 | RABL2A     | 1059  | 1080 | 1            | 1    | -0.25          | -0.48           | 21                        | 12                                       | 3UTR         |
| hsa-miR-11400 | NM_001354412 | RABL2A     | 1032  | 1053 | 1            | 1    | -0.25          | -0.48           | 21                        | 12                                       | 3UTR         |
| hsa-miR-11400 | NM_001354421 | RABL2A     | 836   | 857  | 1            | 1    | -0.25          | -0.48           | 21                        | 12                                       | 3UTR         |
| hsa-miR-11400 | NM_007081    | RABL2B     | 1026  | 1047 | 1            | 1    | -0.18          | -0.39           | 21                        | 12                                       | 3UTR         |
| hsa-miR-11400 | NM_001003789 | RABL2B     | 1033  | 1054 | 1            | 1    | -0.19          | -0.36           | 21                        | 12                                       | 3UTR         |
| hsa-miR-11400 | NM_001130921 | RABL2B     | 1281  | 1302 | 1            | 1    | -0.15          | -0.10           | 21                        | 12                                       | 3UTR         |
| hsa-miR-11400 | NM_001130923 | RABL2B     | 1215  | 1236 | 1            | 1    | -0.26          | -0.30           | 21                        | 12                                       | 3UTR         |
| hsa-miR-11400 | XM_011521858 | RAD51      | 1876  | 1897 | 1            | 1    | 0.00           | 0.00            | 21                        | 6                                        | 3UTR         |
| hsa-miR-11400 | NM_006479    | RAD51AP1   | 1760  | 1778 | 1            | 1    | -0.38          | 0.15            | 18                        | 8                                        | 3UTR         |
| hsa-miR-11400 | NM_001130862 | RAD51AP1   | 1811  | 1829 | 1            | 1    | -0.38          | 0.15            | 18                        | 8                                        | 3UTR         |
| hsa-miR-11400 | NM_001286531 | RAD9B      | 3570  | 3590 | 1            | 1    | 0.64           | 0.19            | 20                        | 7                                        | 3UTR         |
| hsa-miR-11400 | NM_001286532 | RAD9B      | 3592  | 3612 | 1            | 1    | 0.64           | 0.19            | 20                        | 7                                        | 3UTR         |

| mirnaid       | refseqid     | genesymbol | start | end  | binding<br>p | seed | phylopste<br>m | phylopflan<br>k | binding_region_lengt<br>h | longest_<br>consecut<br>ive_pairi<br>ngs | positio<br>n |
|---------------|--------------|------------|-------|------|--------------|------|----------------|-----------------|---------------------------|------------------------------------------|--------------|
| hsa-miR-11400 | NM_001286535 | RAD9B      | 3599  | 3619 | 1            | 1    | 0.64           | 0.19            | 20                        | 7                                        | 3UTR         |
| hsa-miR-11400 | NM_001286536 | RAD9B      | 2343  | 2363 | 1            | 1    | 0.64           | 0.19            | 20                        | 7                                        | 3UTR         |
| hsa-miR-11400 | NM_152442    | RAD9B      | 2659  | 2679 | 1            | 1    | 0.64           | 0.19            | 20                        | 7                                        | 3UTR         |
| hsa-miR-11400 | NM_000448    | RAG1       | 6058  | 6080 | 1            | 1    | 0.19           | 0.57            | 22                        | 12                                       | 3UTR         |
| hsa-miR-11400 | NM_001286247 | RALGPS2    | 2403  | 2431 | 1            | 1    | 2.14           | 1.88            | 28                        | 7                                        | 3UTR         |
| hsa-miR-11400 | NM_152663    | RALGPS2    | 2716  | 2736 | 1            | 1    | 0.79           | 0.57            | 20                        | 12                                       | 3UTR         |
| hsa-miR-11400 | NM_016732    | RALY       | 2252  | 2295 | 1            | 1    | -0.27          | -0.11           | 22                        | 8                                        | 3UTR         |
| hsa-miR-11400 | NM_007367    | RALY       | 2204  | 2247 | 1            | 1    | -0.27          | -0.11           | 22                        | 8                                        | 3UTR         |
| hsa-miR-11400 | NM_001320239 | RANBP10    | 3286  | 3313 | 1            | 1    | 1.71           | 1.12            | 27                        | 9                                        | 3UTR         |
| hsa-miR-11400 | XM_011523738 | RAP1GAP2   | 5438  | 5458 | 1            | 1    | 0.00           | 0.00            | 20                        | 12                                       | 3UTR         |
| hsa-miR-11400 | NM_015085    | RAP1GAP2   | 5373  | 5393 | 1            | 1    | 0.41           | -0.18           | 20                        | 12                                       | 3UTR         |
| hsa-miR-11400 | NM_001100398 | RAP1GAP2   | 5328  | 5348 | 1            | 1    | 0.41           | -0.18           | 20                        | 12                                       | 3UTR         |
| hsa-miR-11400 | NM_021033    | RAP2A      | 955   | 973  | 1            | 1    | 1.04           | 0.91            | 18                        | 10                                       | 3UTR         |
| hsa-miR-11400 | NM_006105    | RAPGEF3    | 4197  | 4219 | 1            | 1    | 1.79           | 2.32            | 22                        | 10                                       | 3UTR         |
| hsa-miR-11400 | NM_001098531 | RAPGEF3    | 4437  | 4459 | 1            | 1    | 1.65           | 1.90            | 22                        | 10                                       | 3UTR         |
| hsa-miR-11400 | NM_016340    | RAPGEF6    | 8014  | 8032 | 1            | 1    | 4.36           | 3.44            | 18                        | 17                                       | 3UTR         |
| hsa-miR-11400 | NM_001164386 | RAPGEF6    | 8038  | 8056 | 1            | 1    | 4.36           | 3.44            | 18                        | 17                                       | 3UTR         |

| mirnaid       | refseqid     | genesymbol | start | end  | binding<br>p | seed | phylopste<br>m | phylopflan<br>k | binding_region_lengt<br>h | longest_<br>consecut<br>ive_pairi<br>ngs | positio<br>n |
|---------------|--------------|------------|-------|------|--------------|------|----------------|-----------------|---------------------------|------------------------------------------|--------------|
| hsa-miR-11400 | NM_001164387 | RAPGEF6    | 7738  | 7756 | 1            | 1    | 4.36           | 3.44            | 18                        | 17                                       | 3UTR         |
| hsa-miR-11400 | NM_001164388 | RAPGEF6    | 7723  | 7741 | 1            | 1    | 4.36           | 3.44            | 18                        | 17                                       | 3UTR         |
| hsa-miR-11400 | XM_011543527 | RASA1      | 3751  | 3775 | 1            | 1    | 0.00           | 0.00            | 24                        | 10                                       | 3UTR         |
| hsa-miR-11400 | NM_001206957 | RASSF1     | 1267  | 1312 | 0.974359     | 1    | 0.00           | 0.00            | 17                        | 15                                       | 3UTR         |
| hsa-miR-11400 | NM_170713    | RASSF1     | 1264  | 1309 | 1            | 1    | 1.89           | 3.11            | 17                        | 15                                       | 3UTR         |
| hsa-miR-11400 | NM_170714    | RASSF1     | 1386  | 1431 | 1            | 1    | 4.38           | 3.87            | 17                        | 15                                       | 3UTR         |
| hsa-miR-11400 | NM_007182    | RASSF1     | 1374  | 1419 | 1            | 1    | 4.50           | 4.29            | 17                        | 15                                       | 3UTR         |
| hsa-miR-11400 | XM_024448822 | RASSF8     | 1527  | 1554 | 1            | 1    | 0.00           | 0.00            | 27                        | 10                                       | 3UTR         |
| hsa-miR-11400 | NM_005447    | RASSF9     | 2115  | 2147 | 1            | 1    | 0.30           | 0.32            | 22                        | 8                                        | 3UTR         |
| hsa-miR-11400 | NM_001135255 | RBBP4      | 4877  | 4895 | 1            | 1    | 0.00           | 0.00            | 18                        | 14                                       | 3UTR         |
| hsa-miR-11400 | NM_001135256 | RBBP4      | 4842  | 4860 | 1            | 1    | 0.05           | 0.03            | 18                        | 14                                       | 3UTR         |
| hsa-miR-11400 | XM_011522546 | RBFOX1     | 2764  | 2785 | 0.980769     | 1    | 0.00           | 0.00            | 21                        | 10                                       | 3UTR         |
| hsa-miR-11400 | XM_017023318 | RBFOX1     | 4344  | 4365 | 0.980769     | 1    | 0.00           | 0.00            | 21                        | 10                                       | 3UTR         |
| hsa-miR-11400 | XM_017023320 | RBFOX1     | 4733  | 4754 | 0.980769     | 1    | 0.00           | 0.00            | 21                        | 10                                       | 3UTR         |
| hsa-miR-11400 | XM_017023322 | RBFOX1     | 7354  | 7375 | 0.980769     | 1    | 0.00           | 0.00            | 21                        | 10                                       | 3UTR         |
| hsa-miR-11400 | XM_017023330 | RBFOX1     | 4158  | 4179 | 0.980769     | 1    | 0.00           | 0.00            | 21                        | 10                                       | 3UTR         |
| hsa-miR-11400 | XM_017023332 | RBFOX1     | 2838  | 2859 | 0.980769     | 1    | 0.00           | 0.00            | 21                        | 10                                       | 3UTR         |



| mirnaid       | refseqid     | genesymbol | start | end  | binding<br>p | seed | phylopste<br>m | phylopflan<br>k | binding_region_lengt<br>h | longest_<br>consecut<br>ive_pairi<br>ngs | positio<br>n |
|---------------|--------------|------------|-------|------|--------------|------|----------------|-----------------|---------------------------|------------------------------------------|--------------|
| hsa-miR-11400 | XM_017023333 | RBFOX1     | 2667  | 2688 | 0.980769     | 1    | 0.00           | 0.00            | 21                        | 10                                       | 3UTR         |
| hsa-miR-11400 | XM_017023336 | RBFOX1     | 2720  | 2741 | 0.980769     | 1    | 0.00           | 0.00            | 21                        | 10                                       | 3UTR         |
| hsa-miR-11400 | XM_024450315 | RBFOX1     | 4620  | 4641 | 0.980769     | 1    | 0.00           | 0.00            | 21                        | 10                                       | 3UTR         |
| hsa-miR-11400 | NM_145891    | RBFOX1     | 2767  | 2788 | 1            | 1    | 2.11           | 1.50            | 21                        | 10                                       | 3UTR         |
| hsa-miR-11400 | NM_145892    | RBFOX1     | 2689  | 2710 | 1            | 1    | 2.11           | 1.50            | 21                        | 10                                       | 3UTR         |
| hsa-miR-11400 | NM_145893    | RBFOX1     | 2820  | 2841 | 1            | 1    | 2.11           | 1.50            | 21                        | 10                                       | 3UTR         |
| hsa-miR-11400 | NM_018723    | RBFOX1     | 3642  | 3663 | 1            | 1    | 2.11           | 1.50            | 21                        | 10                                       | 3UTR         |
| hsa-miR-11400 | NM_001142333 | RBFOX1     | 3561  | 3582 | 1            | 1    | 2.11           | 1.50            | 21                        | 10                                       | 3UTR         |
| hsa-miR-11400 | NM_001142334 | RBFOX1     | 2767  | 2788 | 1            | 1    | 2.11           | 1.50            | 21                        | 10                                       | 3UTR         |
| hsa-miR-11400 | NM_152838    | RBM12      | 4155  | 4184 | 1            | 1    | 1.87           | 2.84            | 24                        | 11                                       | 3UTR         |
| hsa-miR-11400 | NM_006047    | RBM12      | 4187  | 4216 | 1            | 1    | 3.13           | 3.09            | 24                        | 11                                       | 3UTR         |
| hsa-miR-11400 | NM_001198840 | RBM12      | 4102  | 4131 | 1            | 1    | 2.30           | 2.75            | 24                        | 11                                       | 3UTR         |
| hsa-miR-11400 | NM_001146699 | RBM19      | 3743  | 3769 | 1            | 1    | 1.89           | 1.95            | 26                        | 7                                        | 3UTR         |
| hsa-miR-11400 | NM_001308044 | RBM23      | 9025  | 9042 | 1            | 1    | 4.02           | 3.78            | 17                        | 9                                        | 3UTR         |
| hsa-miR-11400 | NM_018107    | RBM23      | 9138  | 9155 | 1            | 1    | 4.77           | 3.98            | 17                        | 9                                        | 3UTR         |
| hsa-miR-11400 | NM_001077351 | RBM23      | 9186  | 9203 | 1            | 1    | 3.49           | 4.02            | 17                        | 9                                        | 3UTR         |
| hsa-miR-11400 | NM_001077352 | RBM23      | 9084  | 9101 | 1            | 1    | 3.60           | 4.11            | 17                        | 9                                        | 3UTR         |

| mirnaid       | refseqid     | genesymbol | start | end  | binding<br>p | seed | phylopste<br>m | phylopflan<br>k | binding_region_lengt<br>h | longest_<br>consecut<br>ive_pairi<br>ngs | positio<br>n |
|---------------|--------------|------------|-------|------|--------------|------|----------------|-----------------|---------------------------|------------------------------------------|--------------|
| hsa-miR-11400 | NM_153020    | RBM24      | 1025  | 1043 | 1            | 1    | 3.42           | 2.55            | 18                        | 8                                        | 3UTR         |
| hsa-miR-11400 | NM_001143941 | RBM24      | 1077  | 1095 | 1            | 1    | 3.42           | 2.55            | 18                        | 8                                        | 3UTR         |
| hsa-miR-11400 | XM_011537044 | RBM25      | 3083  | 3104 | 1            | 1    | 0.00           | 0.00            | 21                        | 10                                       | 3UTR         |
| hsa-miR-11400 | NM_021239    | RBM25      | 2960  | 2981 | 1            | 1    | 3.70           | 3.19            | 21                        | 10                                       | 3UTR         |
| hsa-miR-11400 | NM_032120    | RBM48      | 3811  | 3831 | 1            | 1    | 0.21           | -0.16           | 20                        | 16                                       | 3UTR         |
| hsa-miR-11400 | XM_024453290 | RBM5       | 5515  | 5535 | 1            | 1    | 0.00           | 0.00            | 20                        | 9                                        | 3UTR         |
| hsa-miR-11400 | XM_017019778 | RBMS2      | 7267  | 7285 | 1            | 1    | 0.00           | 0.00            | 18                        | 17                                       | 3UTR         |
| hsa-miR-11400 | XM_017019778 | RBMS2      | 1052  | 1071 | 1            | 1    | 0.00           | 0.00            | 19                        | 10                                       | 3UTR         |
| hsa-miR-11400 | NM_002898    | RBMS2      | 7964  | 7982 | 1            | 1    | -0.33          | -0.21           | 18                        | 17                                       | 3UTR         |
| hsa-miR-11400 | NM_002898    | RBMS2      | 1749  | 1768 | 1            | 1    | -0.13          | 0.27            | 19                        | 10                                       | 3UTR         |
| hsa-miR-11400 | NM_014248    | RBX1       | 919   | 936  | 1            | 1    | 0.16           | 0.10            | 17                        | 10                                       | 3UTR         |
| hsa-miR-11400 | NM_001100588 | RC3H2      | 7372  | 7388 | 1            | 1    | 4.10           | 5.53            | 16                        | 15                                       | 3UTR         |
| hsa-miR-11400 | NM_001285389 | RCAN1      | 638   | 663  | 1            | 1    | 0.75           | 0.73            | 18                        | 16                                       | 3UTR         |
| hsa-miR-11400 | NM_001285393 | RCAN1      | 692   | 717  | 1            | 1    | 0.57           | 0.62            | 18                        | 16                                       | 3UTR         |
| hsa-miR-11400 | NM_203418    | RCAN1      | 741   | 766  | 1            | 1    | 0.33           | 0.21            | 18                        | 16                                       | 3UTR         |
| hsa-miR-11400 | XM_017028283 | RCAN1      | 1290  | 1315 | 1            | 1    | 0.00           | 0.00            | 18                        | 16                                       | 3UTR         |
| hsa-miR-11400 | NM_004414    | RCAN1      | 943   | 960  | 1            | 1    | -0.17          | 0.10            | 17                        | 16                                       | 3UTR         |

| mirnaid       | refseqid     | genesymbol | start | end  | binding<br>p | seed | phylopste<br>m | phylopflan<br>k | binding_region_lengt<br>h | longest_<br>consecut<br>ive_pairi<br>ngs | positio<br>n |
|---------------|--------------|------------|-------|------|--------------|------|----------------|-----------------|---------------------------|------------------------------------------|--------------|
| hsa-miR-11400 | NM_001269    | RCC1       | 1825  | 1874 | 1            | 1    | 0.25           | 0.48            | 19                        | 10                                       | 3UTR         |
| hsa-miR-11400 | NM_001381866 | RCC1       | 2032  | 2081 | 1            | 1    | 0.25           | 0.48            | 19                        | 10                                       | 3UTR         |
| hsa-miR-11400 | NM_001048194 | RCC1       | 1918  | 1967 | 1            | 1    | 0.25           | 0.48            | 19                        | 10                                       | 3UTR         |
| hsa-miR-11400 | NM_001048195 | RCC1       | 1876  | 1925 | 1            | 1    | 0.25           | 0.48            | 19                        | 10                                       | 3UTR         |
| hsa-miR-11400 | NM_001048199 | RCC1       | 1893  | 1942 | 1            | 1    | 0.25           | 0.48            | 19                        | 10                                       | 3UTR         |
| hsa-miR-11400 | NM_001260494 | RDX        | 2337  | 2356 | 1            | 1    | 3.37           | 2.81            | 19                        | 9                                        | 3UTR         |
| hsa-miR-11400 | NM_001003716 | RECQL5     | 2040  | 2057 | 0.980769     | 1    | -0.72          | -0.09           | 17                        | 13                                       | 3UTR         |
| hsa-miR-11400 | NM_004259    | RECQL5     | 3549  | 3567 | 1            | 1    | 0.36           | 0.56            | 18                        | 7                                        | 3UTR         |
| hsa-miR-11400 | NM_001003716 | RECQL5     | 3495  | 3554 | 1            | 1    | 1.05           | 2.00            | 51                        | 10                                       | 3UTR         |
| hsa-miR-11400 | NM_005669    | REEP5      | 2887  | 2909 | 1            | 1    | 2.25           | 2.63            | 22                        | 9                                        | 3UTR         |
| hsa-miR-11400 | NM_001130029 | RELL2      | 1830  | 1850 | 1            | 1    | 1.14           | 0.71            | 20                        | 9                                        | 3UTR         |
| hsa-miR-11400 | NM_001278792 | RFC2       | 1495  | 1520 | 1            | 1    | 0.32           | 0.93            | 25                        | 10                                       | 3UTR         |
| hsa-miR-11400 | NM_181471    | RFC2       | 1602  | 1627 | 1            | 1    | 0.32           | 0.93            | 25                        | 10                                       | 3UTR         |
| hsa-miR-11400 | NM_002914    | RFC2       | 1500  | 1525 | 1            | 1    | 0.32           | 0.93            | 25                        | 10                                       | 3UTR         |
| hsa-miR-11400 | NM_001017368 | RFFL       | 5548  | 5568 | 1            | 1    | 0.48           | 0.59            | 20                        | 12                                       | 3UTR         |
| hsa-miR-11400 | NM_182705    | RFLNB      | 821   | 850  | 1            | 1    | 0.17           | -0.05           | 29                        | 9                                        | 3UTR         |
| hsa-miR-11400 | NM_144629    | RFTN2      | 4687  | 4705 | 1            | 1    | 0.56           | 0.93            | 18                        | 7                                        | 3UTR         |

| mirnaid       | refseqid     | genesymbol | start | end  | binding<br>p | seed | phylopste<br>m | phylopflan<br>k | binding_region_lengt<br>h | longest_<br>consecut<br>ive_pairi<br>ngs | positio<br>n |
|---------------|--------------|------------|-------|------|--------------|------|----------------|-----------------|---------------------------|------------------------------------------|--------------|
| hsa-miR-11400 | XM_017022506 | RFX7       | 7906  | 7925 | 1            | 1    | 0.00           | 0.00            | 19                        | 10                                       | 3UTR         |
| hsa-miR-11400 | NM_001368073 | RFX7       | 5492  | 5511 | 1            | 1    | 1.65           | 1.75            | 19                        | 10                                       | 3UTR         |
| hsa-miR-11400 | NM_001166287 | RGMA       | 9199  | 9219 | 1            | 1    | 0.00           | 0.00            | 20                        | 11                                       | 3UTR         |
| hsa-miR-11400 | NM_001286485 | RGS11      | 1533  | 1562 | 1            | 1    | 3.27           | 2.93            | 15                        | 13                                       | 3UTR         |
| hsa-miR-11400 | NM_003834    | RGS11      | 1577  | 1606 | 1            | 1    | 2.83           | 3.42            | 15                        | 13                                       | 3UTR         |
| hsa-miR-11400 | NM_012419    | RGS17      | 4708  | 4733 | 1            | 1    | 1.93           | 2.60            | 25                        | 12                                       | 3UTR         |
| hsa-miR-11400 | NM_012419    | RGS17      | 2280  | 2298 | 1            | 1    | 0.36           | 0.23            | 18                        | 8                                        | 3UTR         |
| hsa-miR-11400 | XM_011541891 | RHCE       | 2341  | 2358 | 1            | 1    | 0.00           | 0.00            | 17                        | 9                                        | 3UTR         |
| hsa-miR-11400 | XM_011541891 | RHCE       | 1963  | 1980 | 1            | 1    | 0.00           | 0.00            | 17                        | 10                                       | 3UTR         |
| hsa-miR-11400 | NM_004040    | RHOB       | 2158  | 2178 | 1            | 1    | 2.34           | 0.95            | 20                        | 8                                        | 3UTR         |
| hsa-miR-11400 | NM_021205    | RHOU       | 3502  | 3522 | 1            | 1    | 0.21           | 0.27            | 20                        | 8                                        | 3UTR         |
| hsa-miR-11400 | XM_017018287 | RIC3       | 6697  | 6719 | 1            | 1    | 0.00           | 0.00            | 22                        | 12                                       | 3UTR         |
| hsa-miR-11400 | NM_024557    | RIC3       | 3190  | 3210 | 1            | 1    | 0.13           | 0.04            | 20                        | 7                                        | 3UTR         |
| hsa-miR-11400 | NM_001135109 | RIC3       | 2625  | 2667 | 1            | 1    | 0.31           | 0.02            | 21                        | 7                                        | 3UTR         |
| hsa-miR-11400 | NM_001206671 | RIC3       | 4006  | 4023 | 1            | 1    | 2.23           | 2.16            | 17                        | 12                                       | 3UTR         |
| hsa-miR-11400 | NM_001206672 | RIC3       | 2950  | 2970 | 1            | 1    | 0.00           | 0.00            | 20                        | 7                                        | 3UTR         |
| hsa-miR-11400 | NM_173642    | RIMKLA     | 7782  | 7804 | 1            | 1    | 0.93           | 0.17            | 22                        | 15                                       | 3UTR         |

| mirnaid       | refseqid     | genesymbol | start | end  | binding<br>p | seed | phylopste<br>m | phylopflan<br>k | binding_region_lengt<br>h | longest_<br>consecut<br>ive_pairi<br>ngs | positio<br>n |
|---------------|--------------|------------|-------|------|--------------|------|----------------|-----------------|---------------------------|------------------------------------------|--------------|
| hsa-miR-11400 | NM_173642    | RIMKLA     | 1563  | 1585 | 1            | 1    | 0.03           | 0.43            | 22                        | 8                                        | 3UTR         |
| hsa-miR-11400 | NM_001363559 | RIN1       | 4186  | 4209 | 1            | 1    | 1.21           | 0.42            | 23                        | 9                                        | 3UTR         |
| hsa-miR-11400 | NM_018343    | RIOK2      | 2469  | 2494 | 1            | 1    | 2.19           | 1.68            | 25                        | 9                                        | 3UTR         |
| hsa-miR-11400 | NM_001286445 | RIPOR2     | 4094  | 4119 | 0.961538     | 1    | 4.58           | 4.29            | 25                        | 8                                        | 3UTR         |
| hsa-miR-11400 | NM_014722    | RIPOR2     | 4352  | 4377 | 0.961538     | 1    | 4.63           | 4.37            | 25                        | 8                                        | 3UTR         |
| hsa-miR-11400 | NM_001346032 | RIPOR2     | 4158  | 4183 | 0.961538     | 1    | 3.15           | 5.07            | 25                        | 8                                        | 3UTR         |
| hsa-miR-11400 | NM_001286446 | RIPOR2     | 3182  | 3203 | 1            | 1    | 3.27           | 3.23            | 21                        | 9                                        | 3UTR         |
| hsa-miR-11400 | NM_001290268 | RIPOR3     | 3545  | 3561 | 1            | 1    | 5.68           | 3.32            | 16                        | 8                                        | 3UTR         |
| hsa-miR-11400 | NM_080829    | RIPOR3     | 3341  | 3357 | 1            | 1    | 3.87           | 4.10            | 16                        | 8                                        | 3UTR         |
| hsa-miR-11400 | XM_005253972 | RITA1      | 1587  | 1603 | 1            | 1    | 0.00           | 0.00            | 16                        | 9                                        | 3UTR         |
| hsa-miR-11400 | NM_001288794 | RMND5B     | 2087  | 2126 | 1            | 1    | 0.00           | 0.00            | 23                        | 9                                        | 3UTR         |
| hsa-miR-11400 | NM_001288795 | RMND5B     | 1936  | 1975 | 1            | 1    | 0.00           | 0.00            | 23                        | 9                                        | 3UTR         |
| hsa-miR-11400 | NM_001386206 | RNASE10    | 1928  | 1948 | 1            | 1    | 0.00           | 0.00            | 20                        | 7                                        | 3UTR         |
| hsa-miR-11400 | NM_001012975 | RNASE10    | 1558  | 1578 | 1            | 1    | 0.00           | 0.00            | 20                        | 7                                        | 3UTR         |
| hsa-miR-11400 | NM_021133    | RNASEL     | 2584  | 2600 | 1            | 1    | 0.45           | 0.30            | 16                        | 11                                       | 3UTR         |
| hsa-miR-11400 | NM_003730    | RNASET2    | 6539  | 6564 | 1            | 1    | -0.24          | -0.36           | 25                        | 8                                        | 3UTR         |
| hsa-miR-11400 | NM_001254738 | RND3       | 1089  | 1103 | 1            | 1    | 1.40           | 1.43            | 14                        | 10                                       | 3UTR         |

| mirnaid       | refseqid     | genesymbol | start | end  | binding<br>p | seed | phylopste<br>m | phylopflan<br>k | binding_region_lengt<br>h | longest_<br>consecut<br>ive_pairi<br>ngs | positio<br>n |
|---------------|--------------|------------|-------|------|--------------|------|----------------|-----------------|---------------------------|------------------------------------------|--------------|
| hsa-miR-11400 | NM_005168    | RND3       | 968   | 982  | 1            | 1    | 1.42           | 1.62            | 14                        | 10                                       | 3UTR         |
| hsa-miR-11400 | NM_152267    | RNF185     | 1524  | 1555 | 1            | 1    | 0.06           | -0.03           | 22                        | 10                                       | 3UTR         |
| hsa-miR-11400 | NM_001135825 | RNF185     | 1356  | 1387 | 1            | 1    | 0.06           | -0.03           | 22                        | 10                                       | 3UTR         |
| hsa-miR-11400 | NM_001358699 | RNF227     | 1528  | 1570 | 1            | 1    | -0.27          | 0.03            | 18                        | 10                                       | 3UTR         |
| hsa-miR-11400 | NM_001042370 | RO60       | 1988  | 2008 | 1            | 1    | 0.84           | 1.40            | 20                        | 16                                       | 3UTR         |
| hsa-miR-11400 | NM_001173525 | RO60       | 1999  | 2019 | 1            | 1    | 0.84           | 0.79            | 20                        | 16                                       | 3UTR         |
| hsa-miR-11400 | NM_001128929 | ROBO2      | 7206  | 7234 | 1            | 1    | 0.87           | 0.36            | 28                        | 9                                        | 3UTR         |
| hsa-miR-11400 | NM_001301088 | ROBO4      | 4012  | 4033 | 1            | 1    | 1.24           | 0.51            | 21                        | 9                                        | 3UTR         |
| hsa-miR-11400 | NM_019055    | ROBO4      | 4218  | 4239 | 1            | 1    | 1.24           | 0.51            | 21                        | 9                                        | 3UTR         |
| hsa-miR-11400 | NM_024813    | RPAP2      | 3377  | 3395 | 1            | 1    | 0.21           | 0.04            | 18                        | 8                                        | 3UTR         |
| hsa-miR-11400 | NM_003973    | RPL14      | 2082  | 2119 | 1            | 1    | -0.15          | -0.19           | 17                        | 15                                       | 3UTR         |
| hsa-miR-11400 | NM_001034996 | RPL14      | 2193  | 2230 | 1            | 1    | -0.15          | -0.19           | 17                        | 15                                       | 3UTR         |
| hsa-miR-11400 | NM_000983    | RPL22      | 1514  | 1552 | 1            | 1    | 0.30           | 0.42            | 19                        | 11                                       | 3UTR         |
| hsa-miR-11400 | NM_001098577 | RPL31      | 983   | 1005 | 1            | 1    | 0.16           | 0.27            | 22                        | 8                                        | 3UTR         |
| hsa-miR-11400 | XM_005260480 | RPRD1B     | 1997  | 2017 | 1            | 1    | 0.00           | 0.00            | 20                        | 12                                       | 3UTR         |
| hsa-miR-11400 | NM_021215    | RPRD1B     | 1850  | 1870 | 1            | 1    | 0.55           | 0.52            | 20                        | 12                                       | 3UTR         |
| hsa-miR-11400 | NM_001030009 | RPS15A     | 2044  | 2062 | 0.961538     | 1    | 5.43           | 5.66            | 18                        | 9                                        | 3UTR         |

| mirnaid       | refseqid     | genesymbol | start | end   | binding<br>p | seed | phylopste<br>m | phylopflan<br>k | binding_region_lengt<br>h | longest_<br>consecut<br>ive_pairi<br>ngs | positio<br>n |
|---------------|--------------|------------|-------|-------|--------------|------|----------------|-----------------|---------------------------|------------------------------------------|--------------|
| hsa-miR-11400 | NM_033022    | RPS24      | 442   | 456   | 1            | 1    | 1.87           | 2.68            | 14                        | 13                                       | 3UTR         |
| hsa-miR-11400 | NM_001142285 | RPS24      | 1333  | 1352  | 1            | 1    | -0.16          | -0.22           | 19                        | 15                                       | 3UTR         |
| hsa-miR-11400 | NM_004755    | RPS6KA5    | 18022 | 18043 | 1            | 1    | -0.52          | -0.12           | 21                        | 9                                        | 3UTR         |
| hsa-miR-11400 | NM_016052    | RRP15      | 6064  | 6091  | 1            | 1    | 0.93           | 1.11            | 27                        | 8                                        | 3UTR         |
| hsa-miR-11400 | NM_080657    | RSAD2      | 3227  | 3248  | 1            | 1    | -0.29          | -0.08           | 21                        | 10                                       | 3UTR         |
| hsa-miR-11400 | XM_017001518 | RSBN1      | 8386  | 8422  | 1            | 1    | 0.00           | 0.00            | 36                        | 12                                       | 3UTR         |
| hsa-miR-11400 | NM_198467    | RSBN1L     | 3797  | 3815  | 1            | 1    | 0.15           | 0.44            | 18                        | 9                                        | 3UTR         |
| hsa-miR-11400 | NM_001193341 | RSPH9      | 1278  | 1301  | 1            | 1    | 0.00           | 0.00            | 23                        | 8                                        | 3UTR         |
| hsa-miR-11400 | NM_001282863 | RSPO2      | 1602  | 1624  | 1            | 1    | 0.66           | 1.25            | 22                        | 10                                       | 3UTR         |
| hsa-miR-11400 | NM_001317942 | RSPO2      | 915   | 946   | 1            | 1    | 0.17           | 0.35            | 23                        | 10                                       | 3UTR         |
| hsa-miR-11400 | NM_178565    | RSPO2      | 1512  | 1543  | 1            | 1    | 0.27           | 0.23            | 23                        | 10                                       | 3UTR         |
| hsa-miR-11400 | NM_032784    | RSPO3      | 2780  | 2816  | 1            | 1    | 1.40           | 0.94            | 18                        | 16                                       | 3UTR         |
| hsa-miR-11400 | NM_032784    | RSPO3      | 2886  | 2909  | 1            | 1    | 0.03           | 0.40            | 23                        | 12                                       | 3UTR         |
| hsa-miR-11400 | NM_023012    | RSRC2      | 3387  | 3408  | 1            | 1    | 1.28           | 1.65            | 21                        | 8                                        | 3UTR         |
| hsa-miR-11400 | NM_001130841 | RTCA       | 2373  | 2395  | 1            | 1    | 0.06           | 0.02            | 22                        | 9                                        | 3UTR         |
| hsa-miR-11400 | NM_001024455 | RTL5       | 3159  | 3182  | 1            | 1    | 2.20           | 1.47            | 23                        | 7                                        | 3UTR         |
| hsa-miR-11400 | NM_001004312 | RTP2       | 1150  | 1166  | 1            | 1    | 0.69           | 0.30            | 16                        | 13                                       | 3UTR         |

| mirnaid       | refseqid     | genesymbol | start | end  | binding<br>p | seed | phylopste<br>m | phylopflan<br>k | binding_region_lengt<br>h | longest_<br>consecut<br>ive_pairi<br>ngs | positio<br>n |
|---------------|--------------|------------|-------|------|--------------|------|----------------|-----------------|---------------------------|------------------------------------------|--------------|
| hsa-miR-11400 | NM_025113    | RUBCNL     | 9735  | 9755 | 1            | 1    | 0.33           | 0.79            | 20                        | 8                                        | 3UTR         |
| hsa-miR-11400 | NM_001330103 | RUFY2      | 2140  | 2158 | 1            | 1    | 0.46           | 0.35            | 18                        | 12                                       | 3UTR         |
| hsa-miR-11400 | XM_011529766 | RUNX1      | 5860  | 5898 | 1            | 1    | 0.00           | 0.00            | 25                        | 13                                       | 3UTR         |
| hsa-miR-11400 | NM_001001890 | RUNX1      | 7065  | 7103 | 1            | 1    | 0.05           | 0.66            | 25                        | 13                                       | 3UTR         |
| hsa-miR-11400 | NM_175634    | RUNX1T1    | 6978  | 7000 | 0.961538     | 1    | 6.03           | 4.85            | 22                        | 8                                        | 3UTR         |
| hsa-miR-11400 | NM_175635    | RUNX1T1    | 6479  | 6501 | 0.961538     | 1    | 5.57           | 6.81            | 22                        | 8                                        | 3UTR         |
| hsa-miR-11400 | NM_175636    | RUNX1T1    | 6593  | 6615 | 0.961538     | 1    | 6.84           | 6.14            | 22                        | 8                                        | 3UTR         |
| hsa-miR-11400 | NM_004349    | RUNX1T1    | 6365  | 6387 | 0.961538     | 1    | 5.89           | 6.70            | 22                        | 8                                        | 3UTR         |
| hsa-miR-11400 | NM_001198625 | RUNX1T1    | 6867  | 6889 | 0.961538     | 1    | 5.40           | 5.48            | 22                        | 8                                        | 3UTR         |
| hsa-miR-11400 | NM_001198626 | RUNX1T1    | 6725  | 6747 | 0.961538     | 1    | 5.64           | 6.04            | 22                        | 8                                        | 3UTR         |
| hsa-miR-11400 | NM_001198627 | RUNX1T1    | 6785  | 6807 | 0.961538     | 1    | 5.63           | 5.86            | 22                        | 8                                        | 3UTR         |
| hsa-miR-11400 | NM_001198628 | RUNX1T1    | 6558  | 6580 | 0.961538     | 1    | 6.63           | 6.63            | 22                        | 8                                        | 3UTR         |
| hsa-miR-11400 | NM_001198631 | RUNX1T1    | 6581  | 6603 | 0.961538     | 1    | 7.25           | 6.35            | 22                        | 8                                        | 3UTR         |
| hsa-miR-11400 | NM_001198632 | RUNX1T1    | 6643  | 6665 | 0.961538     | 1    | 5.51           | 6.36            | 22                        | 8                                        | 3UTR         |
| hsa-miR-11400 | NM_001198633 | RUNX1T1    | 6805  | 6827 | 0.961538     | 1    | 5.59           | 5.50            | 22                        | 8                                        | 3UTR         |
| hsa-miR-11400 | NM_001198634 | RUNX1T1    | 6408  | 6430 | 0.961538     | 1    | 6.79           | 6.40            | 22                        | 8                                        | 3UTR         |
| hsa-miR-11400 | NM_001198679 | RUNX1T1    | 6552  | 6574 | 0.961538     | 1    | 6.83           | 6.57            | 22                        | 8                                        | 3UTR         |



| mirnaid       | refseqid     | genesymbol | start | end  | binding<br>p | seed | phylopste<br>m | phylopflan<br>k | binding_region_lengt<br>h | longest_<br>consecut<br>ive_pairi<br>ngs | positio<br>n |
|---------------|--------------|------------|-------|------|--------------|------|----------------|-----------------|---------------------------|------------------------------------------|--------------|
| hsa-miR-11400 | NM_001024212 | S100A13    | 467   | 509  | 1            | 1    | -0.54          | -0.11           | 23                        | 6                                        | 3UTR         |
| hsa-miR-11400 | NM_176823    | S100A7A    | 1192  | 1214 | 1            | 1    | -0.48          | -0.77           | 22                        | 12                                       | 3UTR         |
| hsa-miR-11400 | NM_199161    | SAA1       | 437   | 474  | 1            | 1    | 0.09           | 0.26            | 22                        | 11                                       | 3UTR         |
| hsa-miR-11400 | NM_000331    | SAA1       | 584   | 621  | 1            | 1    | 2.24           | 1.10            | 22                        | 11                                       | 3UTR         |
| hsa-miR-11400 | NM_001178006 | SAA1       | 498   | 535  | 1            | 1    | 2.24           | 1.10            | 22                        | 11                                       | 3UTR         |
| hsa-miR-11400 | NM_005500    | SAE1       | 1611  | 1633 | 1            | 1    | -0.39          | 0.08            | 22                        | 8                                        | 3UTR         |
| hsa-miR-11400 | NM_001145713 | SAE1       | 1396  | 1418 | 1            | 1    | -0.39          | 0.08            | 22                        | 8                                        | 3UTR         |
| hsa-miR-11400 | NM_001145714 | SAE1       | 1466  | 1488 | 1            | 1    | -0.39          | 0.08            | 22                        | 8                                        | 3UTR         |
| hsa-miR-11400 | NM_001349811 | SAMD12     | 7829  | 7845 | 1            | 1    | 0.70           | 2.94            | 16                        | 7                                        | 3UTR         |
| hsa-miR-11400 | NM_001349811 | SAMD12     | 2933  | 2975 | 1            | 1    | 0.32           | 0.09            | 18                        | 10                                       | 3UTR         |
| hsa-miR-11400 | NM_001101676 | SAMD12     | 7859  | 7875 | 1            | 1    | 3.53           | 2.65            | 16                        | 7                                        | 3UTR         |
| hsa-miR-11400 | NM_001101676 | SAMD12     | 2963  | 3005 | 1            | 1    | 0.28           | 0.00            | 18                        | 10                                       | 3UTR         |
| hsa-miR-11400 | NM_174920    | SAMD14     | 2579  | 2597 | 1            | 1    | -0.36          | 0.45            | 18                        | 9                                        | 3UTR         |
| hsa-miR-11400 | XM_011524490 | SAMD14     | 1404  | 1422 | 1            | 1    | 0.00           | 0.00            | 18                        | 9                                        | 3UTR         |
| hsa-miR-11400 | XM_017024322 | SAMD14     | 2601  | 2619 | 1            | 1    | 0.00           | 0.00            | 18                        | 9                                        | 3UTR         |
| hsa-miR-11400 | NM_001304366 | SAMD7      | 2246  | 2267 | 1            | 1    | -0.43          | -0.11           | 21                        | 8                                        | 3UTR         |
| hsa-miR-11400 | NM_182610    | SAMD7      | 2269  | 2290 | 1            | 1    | -0.43          | -0.11           | 21                        | 8                                        | 3UTR         |

| mirnaid       | refseqid     | genesymbol | start | end  | binding<br>p | seed | phylopste<br>m | phylopflan<br>k | binding_region_lengt<br>h | longest_<br>consecut<br>ive_pairi<br>ngs | positio<br>n |
|---------------|--------------|------------|-------|------|--------------|------|----------------|-----------------|---------------------------|------------------------------------------|--------------|
| hsa-miR-11400 | NM_144660    | SAMD8      | 4665  | 4691 | 1            | 1    | 0.59           | 0.34            | 26                        | 9                                        | 3UTR         |
| hsa-miR-11400 | NM_001174156 | SAMD8      | 4438  | 4464 | 1            | 1    | 0.59           | 0.34            | 26                        | 9                                        | 3UTR         |
| hsa-miR-11400 | NM_001363733 | SAMHD1     | 2300  | 2319 | 1            | 1    | 1.23           | 4.92            | 19                        | 7                                        | 3UTR         |
| hsa-miR-11400 | NM_016103    | SAR1B      | 3524  | 3546 | 1            | 1    | 0.13           | 0.29            | 22                        | 13                                       | 3UTR         |
| hsa-miR-11400 | NM_001033503 | SAR1B      | 3643  | 3665 | 1            | 1    | 0.13           | 0.33            | 22                        | 13                                       | 3UTR         |
| hsa-miR-11400 | XM_011537057 | SAV1       | 2344  | 2365 | 1            | 1    | 0.00           | 0.00            | 21                        | 8                                        | 3UTR         |
| hsa-miR-11400 | NM_006918    | SC5D       | 5399  | 5418 | 1            | 1    | -0.23          | -0.04           | 19                        | 7                                        | 3UTR         |
| hsa-miR-11400 | NM_001024956 | SC5D       | 5580  | 5599 | 1            | 1    | 0.22           | 0.02            | 19                        | 7                                        | 3UTR         |
| hsa-miR-11400 | NM_004719    | SCAF11     | 5609  | 5634 | 1            | 1    | -0.09          | 0.13            | 25                        | 8                                        | 3UTR         |
| hsa-miR-11400 | NM_138967    | SCAMP5     | 1665  | 1691 | 1            | 1    | 0.05           | 0.19            | 26                        | 8                                        | 3UTR         |
| hsa-miR-11400 | NM_138967    | SCAMP5     | 2138  | 2178 | 1            | 1    | 0.23           | 0.48            | 40                        | 10                                       | 3UTR         |
| hsa-miR-11400 | NM_001178111 | SCAMP5     | 1748  | 1774 | 1            | 1    | 0.05           | 0.19            | 26                        | 8                                        | 3UTR         |
| hsa-miR-11400 | NM_001178111 | SCAMP5     | 2221  | 2261 | 1            | 1    | 0.23           | 0.48            | 40                        | 10                                       | 3UTR         |
| hsa-miR-11400 | NM_005506    | SCARB2     | 2716  | 2748 | 1            | 1    | 1.08           | 0.61            | 32                        | 8                                        | 3UTR         |
| hsa-miR-11400 | NM_001204255 | SCARB2     | 2287  | 2319 | 1            | 1    | 0.00           | 0.00            | 32                        | 8                                        | 3UTR         |
| hsa-miR-11400 | NM_001025591 | SCGB2B2    | 1567  | 1587 | 1            | 1    | 0.04           | -0.05           | 20                        | 10                                       | 3UTR         |
| hsa-miR-11400 | NM_006746    | SCML1      | 2123  | 2163 | 1            | 1    | 1.14           | 0.51            | 21                        | 10                                       | 3UTR         |

| mirnaid       | refseqid     | genesymbol | start | end  | binding<br>p | seed | phylopste<br>m | phylopflan<br>k | binding_region_lengt<br>h | longest_<br>consecut<br>ive_pairi<br>ngs | positio<br>n |
|---------------|--------------|------------|-------|------|--------------|------|----------------|-----------------|---------------------------|------------------------------------------|--------------|
| hsa-miR-11400 | NM_001037535 | SCML1      | 1974  | 2014 | 1            | 1    | 0.72           | 0.46            | 21                        | 10                                       | 3UTR         |
| hsa-miR-11400 | NM_001037536 | SCML1      | 1971  | 2011 | 1            | 1    | 1.14           | 0.51            | 21                        | 10                                       | 3UTR         |
| hsa-miR-11400 | NM_001037540 | SCML1      | 2204  | 2244 | 1            | 1    | 1.14           | 0.51            | 21                        | 10                                       | 3UTR         |
| hsa-miR-11400 | NM_001286408 | SCML4      | 2782  | 2800 | 1            | 1    | 1.04           | 0.89            | 18                        | 9                                        | 3UTR         |
| hsa-miR-11400 | NM_198081    | SCML4      | 2997  | 3015 | 1            | 1    | 0.35           | 0.79            | 18                        | 9                                        | 3UTR         |
| hsa-miR-11400 | NM_021007    | SCN2A      | 6987  | 7030 | 1            | 1    | 0.77           | 1.82            | 43                        | 11                                       | 3UTR         |
| hsa-miR-11400 | NM_001371246 | SCN2A      | 7133  | 7176 | 1            | 1    | 0.77           | 1.82            | 43                        | 11                                       | 3UTR         |
| hsa-miR-11400 | NM_001371247 | SCN2A      | 6961  | 7004 | 1            | 1    | 0.77           | 1.82            | 43                        | 11                                       | 3UTR         |
| hsa-miR-11400 | NM_001040142 | SCN2A      | 7133  | 7176 | 1            | 1    | 0.77           | 1.82            | 43                        | 11                                       | 3UTR         |
| hsa-miR-11400 | NM_001040143 | SCN2A      | 7252  | 7295 | 1            | 1    | 0.77           | 1.82            | 43                        | 11                                       | 3UTR         |
| hsa-miR-11400 | NM_004588    | SCN2B      | 2965  | 2990 | 1            | 1    | 0.26           | -0.22           | 25                        | 11                                       | 3UTR         |
| hsa-miR-11400 | NM_174934    | SCN4B      | 4009  | 4029 | 1            | 1    | 0.24           | 1.94            | 20                        | 8                                        | 3UTR         |
| hsa-miR-11400 | NM_001142348 | SCN4B      | 3607  | 3627 | 1            | 1    | 0.49           | 1.65            | 20                        | 8                                        | 3UTR         |
| hsa-miR-11400 | NM_024041    | SCNM1      | 831   | 847  | 1            | 1    | 0.64           | 0.30            | 16                        | 15                                       | 3UTR         |
| hsa-miR-11400 | NM_001204856 | SCNM1      | 880   | 896  | 1            | 1    | 0.79           | 0.19            | 16                        | 15                                       | 3UTR         |
| hsa-miR-11400 | NM_032547    | SCOC       | 3709  | 3728 | 1            | 1    | 0.17           | -0.02           | 19                        | 10                                       | 3UTR         |
| hsa-miR-11400 | NM_001153484 | SCOC       | 3590  | 3609 | 1            | 1    | 0.17           | -0.02           | 19                        | 10                                       | 3UTR         |

| mirnaid       | refseqid     | genesymbol | start | end  | binding<br>p | seed | phylopste<br>m | phylopflan<br>k | binding_region_lengt<br>h | longest_<br>consecut<br>ive_pairi<br>ngs | positio<br>n |
|---------------|--------------|------------|-------|------|--------------|------|----------------|-----------------|---------------------------|------------------------------------------|--------------|
| hsa-miR-11400 | NM_001278172 | SDHC       | 9224  | 9254 | 1            | 1    | 0.01           | 0.00            | 30                        | 13                                       | 3UTR         |
| hsa-miR-11400 | NM_001035511 | SDHC       | 9326  | 9356 | 1            | 1    | 0.01           | 0.00            | 30                        | 13                                       | 3UTR         |
| hsa-miR-11400 | NM_001035512 | SDHC       | 9388  | 9418 | 1            | 1    | 0.01           | 0.00            | 30                        | 13                                       | 3UTR         |
| hsa-miR-11400 | NM_001035513 | SDHC       | 9331  | 9361 | 1            | 1    | 0.01           | 0.00            | 30                        | 13                                       | 3UTR         |
| hsa-miR-11400 | NM_001318049 | SDR16C5    | 1760  | 1783 | 1            | 1    | 0.13           | -0.13           | 17                        | 10                                       | 3UTR         |
| hsa-miR-11400 | NM_001318050 | SDR16C5    | 1481  | 1504 | 1            | 1    | -0.66          | -0.65           | 17                        | 10                                       | 3UTR         |
| hsa-miR-11400 | NM_138969    | SDR16C5    | 1613  | 1636 | 1            | 1    | -0.06          | -0.04           | 17                        | 10                                       | 3UTR         |
| hsa-miR-11400 | XM_024453705 | SEC13      | 1092  | 1128 | 1            | 1    | 0.00           | 0.00            | 36                        | 12                                       | 3UTR         |
| hsa-miR-11400 | NM_001291932 | SEC14L2    | 1961  | 1979 | 1            | 1    | 0.17           | 0.23            | 18                        | 17                                       | 3UTR         |
| hsa-miR-11400 | NM_012429    | SEC14L2    | 2037  | 2055 | 1            | 1    | 0.17           | 0.23            | 18                        | 17                                       | 3UTR         |
| hsa-miR-11400 | NM_001204204 | SEC14L2    | 1788  | 1806 | 1            | 1    | 1.13           | 0.98            | 18                        | 17                                       | 3UTR         |
| hsa-miR-11400 | NM_001193336 | SEC14L6    | 1300  | 1320 | 1            | 1    | 0.04           | 0.14            | 20                        | 11                                       | 3UTR         |
| hsa-miR-11400 | NM_032970    | SEC22C     | 5609  | 5627 | 1            | 1    | 4.54           | 3.80            | 18                        | 9                                        | 3UTR         |
| hsa-miR-11400 | XM_024453816 | SEC22C     | 5733  | 5751 | 1            | 1    | 0.00           | 0.00            | 18                        | 9                                        | 3UTR         |
| hsa-miR-11400 | NM_015490    | SEC31B     | 4355  | 4373 | 1            | 1    | 4.05           | 4.06            | 18                        | 7                                        | 3UTR         |
| hsa-miR-11400 | NM_007214    | SEC63      | 2804  | 2823 | 1            | 1    | -0.05          | 0.17            | 19                        | 9                                        | 3UTR         |
| hsa-miR-11400 | NM_000450    | SELE       | 2379  | 2400 | 1            | 1    | 0.62           | 0.91            | 21                        | 8                                        | 3UTR         |

| mirnaid       | refseqid     | genesymbol | start | end  | binding<br>p | seed | phylopste<br>m | phylopflan<br>k | binding_region_lengt<br>h | longest_<br>consecut<br>ive_pairi<br>ngs | positio<br>n |
|---------------|--------------|------------|-------|------|--------------|------|----------------|-----------------|---------------------------|------------------------------------------|--------------|
| hsa-miR-11400 | NM_033505    | SELENOI    | 3550  | 3596 | 1            | 1    | -0.04          | -0.10           | 20                        | 10                                       | 3UTR         |
| hsa-miR-11400 | NM_020163    | SEMA3G     | 3443  | 3465 | 1            | 1    | 2.91           | 1.88            | 22                        | 12                                       | 3UTR         |
| hsa-miR-11400 | NM_001271662 | SEMA4F     | 2655  | 2672 | 1            | 1    | 0.23           | 0.07            | 17                        | 16                                       | 3UTR         |
| hsa-miR-11400 | XM_011514156 | SEMA5A     | 5901  | 5919 | 1            | 1    | 0.00           | 0.00            | 18                        | 10                                       | 3UTR         |
| hsa-miR-11400 | NM_001267594 | SENP1      | 3093  | 3111 | 1            | 1    | 4.63           | 2.47            | 18                        | 10                                       | 3UTR         |
| hsa-miR-11400 | NM_001267595 | SENP1      | 3440  | 3458 | 1            | 1    | 1.17           | 2.18            | 18                        | 10                                       | 3UTR         |
| hsa-miR-11400 | NM_001308045 | SENP5      | 5910  | 5932 | 1            | 1    | 0.62           | 0.82            | 22                        | 7                                        | 3UTR         |
| hsa-miR-11400 | NM_001308045 | SENP5      | 3444  | 3461 | 1            | 1    | 0.00           | -0.47           | 17                        | 9                                        | 3UTR         |
| hsa-miR-11400 | NM_152699    | SENP5      | 6048  | 6070 | 1            | 1    | 1.03           | 0.95            | 22                        | 7                                        | 3UTR         |
| hsa-miR-11400 | NM_001166340 | SENP8      | 3834  | 3859 | 1            | 1    | 0.00           | 0.00            | 25                        | 8                                        | 3UTR         |
| hsa-miR-11400 | NM_001293695 | SEPTIN9    | 2975  | 2996 | 1            | 1    | -0.60          | -0.86           | 21                        | 15                                       | 3UTR         |
| hsa-miR-11400 | NM_001293696 | SEPTIN9    | 2338  | 2359 | 1            | 1    | -0.60          | -0.86           | 21                        | 15                                       | 3UTR         |
| hsa-miR-11400 | NM_001293697 | SEPTIN9    | 2319  | 2340 | 1            | 1    | -0.60          | -0.86           | 21                        | 15                                       | 3UTR         |
| hsa-miR-11400 | NM_001293698 | SEPTIN9    | 2611  | 2632 | 1            | 1    | -0.60          | -0.86           | 21                        | 15                                       | 3UTR         |
| hsa-miR-11400 | NM_006640    | SEPTIN9    | 3750  | 3771 | 1            | 1    | -0.78          | -0.79           | 21                        | 15                                       | 3UTR         |
| hsa-miR-11400 | NM_001113491 | SEPTIN9    | 3032  | 3053 | 1            | 1    | -0.60          | -0.86           | 21                        | 15                                       | 3UTR         |
| hsa-miR-11400 | NM_001113492 | SEPTIN9    | 3252  | 3273 | 1            | 1    | -0.60          | -0.68           | 21                        | 15                                       | 3UTR         |

| mirnaid       | refseqid     | genesymbol | start | end  | binding<br>p | seed | phylopste<br>m | phylopflan<br>k | binding_region_lengt<br>h | longest_<br>consecut<br>ive_pairi<br>ngs | positio<br>n |
|---------------|--------------|------------|-------|------|--------------|------|----------------|-----------------|---------------------------|------------------------------------------|--------------|
| hsa-miR-11400 | NM_001113493 | SEPTIN9    | 3135  | 3156 | 1            | 1    | -0.60          | -0.86           | 21                        | 15                                       | 3UTR         |
| hsa-miR-11400 | NM_001113494 | SEPTIN9    | 3235  | 3256 | 1            | 1    | -0.60          | -0.86           | 21                        | 15                                       | 3UTR         |
| hsa-miR-11400 | NM_001113495 | SEPTIN9    | 2543  | 2564 | 1            | 1    | -0.60          | -0.86           | 21                        | 15                                       | 3UTR         |
| hsa-miR-11400 | NM_001113496 | SEPTIN9    | 2312  | 2333 | 1            | 1    | -0.60          | -0.86           | 21                        | 15                                       | 3UTR         |
| hsa-miR-11400 | NM_014445    | SERP1      | 1140  | 1159 | 1            | 1    | 1.36           | 0.73            | 19                        | 8                                        | 3UTR         |
| hsa-miR-11400 | XM_024449352 | SERP2      | 582   | 596  | 1            | 1    | 0.00           | 0.00            | 14                        | 13                                       | 3UTR         |
| hsa-miR-11400 | XM_005267733 | SERPINA10  | 1613  | 1629 | 1            | 1    | 0.00           | 0.00            | 16                        | 15                                       | 3UTR         |
| hsa-miR-11400 | XM_017021353 | SERPINA10  | 1812  | 1828 | 1            | 1    | 0.00           | 0.00            | 16                        | 15                                       | 3UTR         |
| hsa-miR-11400 | NM_001100607 | SERPINA10  | 1525  | 1541 | 1            | 1    | -0.31          | 0.02            | 16                        | 15                                       | 3UTR         |
| hsa-miR-11400 | NM_000602    | SERPINE1   | 2535  | 2555 | 1            | 1    | 1.74           | 1.96            | 20                        | 8                                        | 3UTR         |
| hsa-miR-11400 | NM_013376    | SERTAD1    | 926   | 943  | 1            | 1    | 0.13           | 0.43            | 17                        | 11                                       | 3UTR         |
| hsa-miR-11400 | NM_203344    | SERTAD3    | 1073  | 1094 | 1            | 1    | 1.90           | 1.88            | 21                        | 12                                       | 3UTR         |
| hsa-miR-11400 | NM_001271594 | SESN3      | 4072  | 4089 | 1            | 1    | 0.09           | 0.38            | 17                        | 9                                        | 3UTR         |
| hsa-miR-11400 | NM_001271594 | SESN3      | 4826  | 4846 | 1            | 1    | 0.64           | 0.63            | 20                        | 7                                        | 3UTR         |
| hsa-miR-11400 | NM_144665    | SESN3      | 4356  | 4373 | 1            | 1    | 0.86           | 0.40            | 17                        | 9                                        | 3UTR         |
| hsa-miR-11400 | NM_001286752 | SETD4      | 2276  | 2294 | 1            | 1    | 3.67           | 1.95            | 18                        | 8                                        | 3UTR         |
| hsa-miR-11400 | NM_017438    | SETD4      | 2009  | 2027 | 1            | 1    | 1.62           | 2.61            | 18                        | 8                                        | 3UTR         |

| mirnaid       | refseqid     | genesymbol | start | end  | binding<br>p | seed | phylopste<br>m | phylopflan<br>k | binding_region_lengt<br>h | longest_<br>consecut<br>ive_pairi<br>ngs | positio<br>n |
|---------------|--------------|------------|-------|------|--------------|------|----------------|-----------------|---------------------------|------------------------------------------|--------------|
| hsa-miR-11400 | NM_001160305 | SETD6      | 3069  | 3090 | 1            | 1    | 2.38           | 2.44            | 21                        | 7                                        | 3UTR         |
| hsa-miR-11400 | NM_005877    | SF3A1      | 3441  | 3468 | 1            | 1    | 6.22           | 6.17            | 27                        | 10                                       | 3UTR         |
| hsa-miR-11400 | NM_005877    | SF3A1      | 3568  | 3590 | 1            | 1    | 5.67           | 5.42            | 22                        | 7                                        | 3UTR         |
| hsa-miR-11400 | XM_011519611 | SFMBT2     | 6523  | 6549 | 1            | 1    | 0.00           | 0.00            | 26                        | 9                                        | 3UTR         |
| hsa-miR-11400 | NM_001029880 | SFMBT2     | 6455  | 6472 | 1            | 1    | 3.26           | 4.46            | 17                        | 8                                        | 3UTR         |
| hsa-miR-11400 | NM_001029880 | SFMBT2     | 6528  | 6554 | 1            | 1    | 2.44           | 3.50            | 26                        | 9                                        | 3UTR         |
| hsa-miR-11400 | NM_003012    | SFRP1      | 3629  | 3656 | 1            | 1    | 3.86           | 4.19            | 27                        | 9                                        | 3UTR         |
| hsa-miR-11400 | NM_178858    | SFXN2      | 2256  | 2289 | 1            | 1    | 0.44           | 0.16            | 20                        | 10                                       | 3UTR         |
| hsa-miR-11400 | NM_000337    | SGCD       | 4582  | 4626 | 1            | 1    | -0.08          | -0.08           | 19                        | 8                                        | 3UTR         |
| hsa-miR-11400 | NM_001128209 | SGCD       | 4536  | 4580 | 1            | 1    | -0.08          | -0.08           | 19                        | 8                                        | 3UTR         |
| hsa-miR-11400 | NM_001308294 | SH2B1      | 1384  | 1415 | 1            | 1    | 2.25           | 1.87            | 31                        | 13                                       | 3UTR         |
| hsa-miR-11400 | NM_001145797 | SH2B1      | 2502  | 2533 | 1            | 1    | 2.25           | 1.87            | 31                        | 13                                       | 3UTR         |
| hsa-miR-11400 | NM_001174160 | SH2D4A     | 2313  | 2330 | 1            | 1    | -0.04          | -0.12           | 17                        | 10                                       | 3UTR         |
| hsa-miR-11400 | NM_001145719 | SH2D4B     | 1982  | 2021 | 1            | 1    | -0.17          | -0.11           | 39                        | 11                                       | 3UTR         |
| hsa-miR-11400 | NM_031469    | SH3BGRL2   | 472   | 497  | 1            | 1    | 1.41           | 2.11            | 25                        | 12                                       | 3UTR         |
| hsa-miR-11400 | NM_001199944 | SH3GL1     | 2226  | 2250 | 1            | 1    | 0.31           | 0.80            | 24                        | 11                                       | 3UTR         |
| hsa-miR-11400 | NM_014631    | SH3PXD2A   | 4920  | 4937 | 1            | 1    | 0.00           | 0.84            | 17                        | 9                                        | 3UTR         |

| mirnaid       | refseqid         | genesymbol | start | end   | binding<br>p | seed | phylopste<br>m | phylopflan<br>k | binding_region_lengt<br>h | longest_<br>consecut<br>ive_pairi<br>ngs | positio<br>n |
|---------------|------------------|------------|-------|-------|--------------|------|----------------|-----------------|---------------------------|------------------------------------------|--------------|
| hsa-miR-11400 | NM_024577        | SH3TC2     | 23930 | 23960 | 1            | 1    | 1.42           | 1.89            | 30                        | 16                                       | 3UTR         |
| hsa-miR-11400 | NM_024577        | SH3TC2     | 5901  | 5918  | 1            | 1    | 0.12           | 0.06            | 17                        | 11                                       | 3UTR         |
| hsa-miR-11400 | NM_016848        | SHC3       | 8323  | 8369  | 1            | 1    | 2.71           | 1.90            | 46                        | 10                                       | 3UTR         |
| hsa-miR-11400 | NM_198149        | SHISA4     | 930   | 949   | 1            | 1    | 0.16           | 0.34            | 19                        | 13                                       | 3UTR         |
| hsa-miR-11400 | NM_00116444<br>2 | SHISAL2B   | 707   | 728   | 1            | 1    | 0.27           | 0.24            | 21                        | 9                                        | 3UTR         |
| hsa-miR-11400 | NM_198849        | SIAH3      | 2618  | 2636  | 1            | 1    | -0.28          | -0.17           | 18                        | 15                                       | 3UTR         |
| hsa-miR-11400 | NM_015191        | SIK2       | 3604  | 3629  | 1            | 1    | 0.24           | 0.13            | 25                        | 8                                        | 3UTR         |
| hsa-miR-11400 | NM_00110239<br>6 | SIKE1      | 4053  | 4093  | 1            | 1    | 0.43           | 0.18            | 18                        | 16                                       | 3UTR         |
| hsa-miR-11400 | XM_00527321<br>3 | SIPA1L2    | 5630  | 5669  | 0.974359     | 1    | 0.00           | 0.00            | 19                        | 10                                       | 3UTR         |
| hsa-miR-11400 | XM_01700189<br>6 | SIPA1L2    | 5683  | 5722  | 0.974359     | 1    | 0.00           | 0.00            | 19                        | 10                                       | 3UTR         |
| hsa-miR-11400 | XM_01700189<br>7 | SIPA1L2    | 5897  | 5915  | 0.974359     | 1    | 0.00           | 0.00            | 18                        | 10                                       | 3UTR         |
| hsa-miR-11400 | NM_020808        | SIPA1L2    | 5928  | 5946  | 1            | 1    | 3.22           | 2.38            | 18                        | 10                                       | 3UTR         |
| hsa-miR-11400 | NM_170679        | SKP1       | 8019  | 8035  | 0.953846     | 1    | 1.66           | 0.84            | 16                        | 7                                        | 3UTR         |
| hsa-miR-11400 | NM_00104555<br>7 | SLA        | 1828  | 1846  | 1            | 1    | 2.02           | 1.32            | 18                        | 9                                        | 3UTR         |
| hsa-miR-11400 | NM_032214        | SLA2       | 1296  | 1320  | 1            | 1    | 0.21           | 0.00            | 24                        | 15                                       | 3UTR         |
| hsa-miR-11400 | NM_032214        | SLA2       | 2296  | 2314  | 1            | 1    | 0.02           | 0.75            | 18                        | 7                                        | 3UTR         |
| hsa-miR-11400 | NM_175077        | SLA2       | 1246  | 1270  | 1            | 1    | -0.02          | 0.00            | 24                        | 15                                       | 3UTR         |



| mirnaid       | refseqid     | genesymbol | start | end  | binding<br>p | seed | phylopste<br>m | phylopflan<br>k | binding_region_lengt<br>h | longest_<br>consecut<br>ive_pairi<br>ngs | positio<br>n |
|---------------|--------------|------------|-------|------|--------------|------|----------------|-----------------|---------------------------|------------------------------------------|--------------|
| hsa-miR-11400 | NM_175077    | SLA2       | 2246  | 2264 | 1            | 1    | 0.02           | 0.75            | 18                        | 7                                        | 3UTR         |
| hsa-miR-11400 | NM_003037    | SLAMF1     | 2889  | 2912 | 1            | 1    | -0.63          | 0.47            | 17                        | 12                                       | 3UTR         |
| hsa-miR-11400 | NM_001330754 | SLAMF1     | 2712  | 2728 | 1            | 1    | 0.99           | 1.26            | 16                        | 12                                       | 3UTR         |
| hsa-miR-11400 | NM_001282588 | SLAMF7     | 1294  | 1316 | 1            | 1    | 0.01           | -0.11           | 22                        | 10                                       | 3UTR         |
| hsa-miR-11400 | NM_001282588 | SLAMF7     | 1480  | 1499 | 1            | 1    | -0.15          | -0.02           | 19                        | 15                                       | 3UTR         |
| hsa-miR-11400 | NM_001282589 | SLAMF7     | 1398  | 1420 | 1            | 1    | 0.01           | -0.11           | 22                        | 10                                       | 3UTR         |
| hsa-miR-11400 | NM_001282589 | SLAMF7     | 1584  | 1603 | 1            | 1    | -0.15          | -0.02           | 19                        | 15                                       | 3UTR         |
| hsa-miR-11400 | NM_001282590 | SLAMF7     | 1470  | 1492 | 1            | 1    | -0.26          | -0.11           | 22                        | 10                                       | 3UTR         |
| hsa-miR-11400 | NM_001282590 | SLAMF7     | 1656  | 1675 | 1            | 1    | -0.44          | -0.12           | 19                        | 15                                       | 3UTR         |
| hsa-miR-11400 | NM_001282591 | SLAMF7     | 1350  | 1372 | 1            | 1    | 0.01           | -0.11           | 22                        | 10                                       | 3UTR         |
| hsa-miR-11400 | NM_001282591 | SLAMF7     | 1536  | 1555 | 1            | 1    | -0.15          | -0.02           | 19                        | 15                                       | 3UTR         |
| hsa-miR-11400 | NM_001282592 | SLAMF7     | 1687  | 1709 | 1            | 1    | -0.26          | -0.11           | 22                        | 10                                       | 3UTR         |
| hsa-miR-11400 | NM_001282592 | SLAMF7     | 1873  | 1892 | 1            | 1    | -0.44          | -0.12           | 19                        | 15                                       | 3UTR         |
| hsa-miR-11400 | NM_001282593 | SLAMF7     | 1246  | 1268 | 1            | 1    | 0.01           | -0.11           | 22                        | 10                                       | 3UTR         |
| hsa-miR-11400 | NM_001282593 | SLAMF7     | 1432  | 1451 | 1            | 1    | -0.15          | -0.02           | 19                        | 15                                       | 3UTR         |
| hsa-miR-11400 | NM_001282594 | SLAMF7     | 1509  | 1531 | 1            | 1    | 0.01           | -0.11           | 22                        | 10                                       | 3UTR         |
| hsa-miR-11400 | NM_001282594 | SLAMF7     | 1695  | 1714 | 1            | 1    | -0.15          | -0.02           | 19                        | 15                                       | 3UTR         |

| mirnaid       | refseqid     | genesymbol | start | end  | binding<br>p | seed | phylopste<br>m | phylopflan<br>k | binding_region_lengt<br>h | longest_<br>consecut<br>ive_pairi<br>ngs | positio<br>n |
|---------------|--------------|------------|-------|------|--------------|------|----------------|-----------------|---------------------------|------------------------------------------|--------------|
| hsa-miR-11400 | NM_021181    | SLAMF7     | 1791  | 1813 | 1            | 1    | -0.26          | -0.11           | 22                        | 10                                       | 3UTR         |
| hsa-miR-11400 | NM_021181    | SLAMF7     | 1977  | 1996 | 1            | 1    | -0.44          | -0.12           | 19                        | 15                                       | 3UTR         |
| hsa-miR-11400 | NM_001300842 | SLC10A7    | 1796  | 1846 | 1            | 1    | 0.60           | 0.60            | 20                        | 13                                       | 3UTR         |
| hsa-miR-11400 | NM_001317816 | SLC10A7    | 1646  | 1696 | 1            | 1    | 0.89           | 0.24            | 20                        | 13                                       | 3UTR         |
| hsa-miR-11400 | NM_001029998 | SLC10A7    | 1685  | 1735 | 1            | 1    | 0.10           | 0.29            | 20                        | 13                                       | 3UTR         |
| hsa-miR-11400 | NM_001284510 | SLC13A5    | 2568  | 2590 | 1            | 1    | 1.08           | 1.99            | 22                        | 9                                        | 3UTR         |
| hsa-miR-11400 | NM_177550    | SLC13A5    | 2697  | 2719 | 1            | 1    | 0.37           | 2.33            | 22                        | 9                                        | 3UTR         |
| hsa-miR-11400 | NM_001143838 | SLC13A5    | 2559  | 2581 | 1            | 1    | 0.37           | 2.33            | 22                        | 9                                        | 3UTR         |
| hsa-miR-11400 | NM_001308278 | SLC14A1    | 1668  | 1697 | 1            | 1    | -0.77          | -0.20           | 20                        | 18                                       | 3UTR         |
| hsa-miR-11400 | NM_001308279 | SLC14A1    | 1478  | 1507 | 1            | 1    | -0.77          | -0.20           | 20                        | 18                                       | 3UTR         |
| hsa-miR-11400 | XM_005258333 | SLC14A1    | 1442  | 1471 | 1            | 1    | 0.00           | 0.00            | 20                        | 18                                       | 3UTR         |
| hsa-miR-11400 | NM_015865    | SLC14A1    | 1840  | 1869 | 1            | 1    | -0.77          | -0.20           | 20                        | 18                                       | 3UTR         |
| hsa-miR-11400 | NM_001128588 | SLC14A1    | 1998  | 2027 | 1            | 1    | -0.77          | -0.20           | 20                        | 18                                       | 3UTR         |
| hsa-miR-11400 | NM_001146036 | SLC14A1    | 1927  | 1956 | 1            | 1    | -0.77          | -0.20           | 20                        | 18                                       | 3UTR         |
| hsa-miR-11400 | NM_001146037 | SLC14A1    | 2149  | 2178 | 1            | 1    | -0.77          | -0.20           | 20                        | 18                                       | 3UTR         |
| hsa-miR-11400 | XM_011510752 | SLC16A14   | 2207  | 2228 | 1            | 1    | 0.00           | 0.00            | 21                        | 9                                        | 3UTR         |
| hsa-miR-11400 | NM_004207    | SLC16A3    | 1519  | 1537 | 1            | 1    | 0.49           | 1.51            | 18                        | 9                                        | 3UTR         |

| mirnaid       | refseqid     | genesymbol | start | end  | binding<br>p | seed | phylopste<br>m | phylopflan<br>k | binding_region_lengt<br>h | longest_<br>consecut<br>ive_pairi<br>ngs | positio<br>n |
|---------------|--------------|------------|-------|------|--------------|------|----------------|-----------------|---------------------------|------------------------------------------|--------------|
| hsa-miR-11400 | NM_001042423 | SLC16A3    | 1582  | 1600 | 1            | 1    | 0.49           | 1.51            | 18                        | 9                                        | 3UTR         |
| hsa-miR-11400 | NM_001206950 | SLC16A3    | 1565  | 1583 | 1            | 1    | 2.08           | 2.53            | 18                        | 9                                        | 3UTR         |
| hsa-miR-11400 | NM_001206951 | SLC16A3    | 1546  | 1574 | 1            | 1    | 2.82           | 1.22            | 28                        | 10                                       | 3UTR         |
| hsa-miR-11400 | NM_001206952 | SLC16A3    | 1523  | 1541 | 1            | 1    | 1.79           | 1.30            | 18                        | 9                                        | 3UTR         |
| hsa-miR-11400 | NM_139319    | SLC17A8    | 3639  | 3656 | 1            | 1    | -0.05          | 0.23            | 17                        | 12                                       | 3UTR         |
| hsa-miR-11400 | NM_001145288 | SLC17A8    | 3489  | 3506 | 1            | 1    | -0.05          | 0.23            | 17                        | 12                                       | 3UTR         |
| hsa-miR-11400 | NM_001319667 | SLC19A2    | 2380  | 2431 | 1            | 1    | 2.44           | 3.16            | 19                        | 10                                       | 3UTR         |
| hsa-miR-11400 | NM_001195728 | SLC1A2     | 3087  | 3109 | 1            | 1    | 0.88           | 0.90            | 22                        | 7                                        | 3UTR         |
| hsa-miR-11400 | NM_001166696 | SLC1A3     | 864   | 886  | 1            | 1    | 0.35           | 0.34            | 16                        | 14                                       | 3UTR         |
| hsa-miR-11400 | NM_001307985 | SLC22A11   | 2671  | 2688 | 1            | 1    | -0.40          | -0.15           | 17                        | 10                                       | 3UTR         |
| hsa-miR-11400 | NM_018484    | SLC22A11   | 2995  | 3012 | 1            | 1    | -0.40          | -0.15           | 17                        | 10                                       | 3UTR         |
| hsa-miR-11400 | NM_001286455 | SLC22A23   | 1659  | 1683 | 1            | 1    | -0.32          | -0.29           | 24                        | 9                                        | 3UTR         |
| hsa-miR-11400 | NM_015482    | SLC22A23   | 2609  | 2633 | 1            | 1    | -0.51          | 0.00            | 24                        | 9                                        | 3UTR         |
| hsa-miR-11400 | NM_020344    | SLC24A2    | 5019  | 5041 | 1            | 1    | 0.35           | -0.14           | 22                        | 7                                        | 3UTR         |
| hsa-miR-11400 | NM_020344    | SLC24A2    | 2372  | 2393 | 1            | 1    | -0.10          | 0.07            | 21                        | 8                                        | 3UTR         |
| hsa-miR-11400 | NM_001193288 | SLC24A2    | 4968  | 4990 | 1            | 1    | 0.05           | 0.15            | 22                        | 7                                        | 3UTR         |
| hsa-miR-11400 | XM_024452474 | SLC25A14   | 953   | 974  | 1            | 1    | 0.00           | 0.00            | 21                        | 12                                       | 3UTR         |

| mirnaid       | refseqid     | genesymbol | start | end  | binding<br>p | seed | phylopste<br>m | phylopflan<br>k | binding_region_lengt<br>h | longest_<br>consecut<br>ive_pairi<br>ngs | positio<br>n |
|---------------|--------------|------------|-------|------|--------------|------|----------------|-----------------|---------------------------|------------------------------------------|--------------|
| hsa-miR-11400 | NM_001282727 | SLC25A17   | 927   | 957  | 1            | 1    | 0.73           | 0.41            | 19                        | 9                                        | 3UTR         |
| hsa-miR-11400 | NM_006358    | SLC25A17   | 1146  | 1176 | 1            | 1    | -0.09          | -0.08           | 19                        | 9                                        | 3UTR         |
| hsa-miR-11400 | NM_024698    | SLC25A22   | 1454  | 1473 | 0.953846     | 1    | 1.14           | 1.76            | 19                        | 10                                       | 3UTR         |
| hsa-miR-11400 | NM_001191060 | SLC25A22   | 1645  | 1664 | 0.953846     | 1    | 1.23           | 2.27            | 19                        | 10                                       | 3UTR         |
| hsa-miR-11400 | NM_152333    | SLC25A29   | 2173  | 2195 | 1            | 1    | -0.32          | -0.15           | 22                        | 9                                        | 3UTR         |
| hsa-miR-11400 | NM_001352822 | SLC25A29   | 2293  | 2315 | 1            | 1    | -0.32          | -0.15           | 22                        | 9                                        | 3UTR         |
| hsa-miR-11400 | NM_001352823 | SLC25A29   | 2379  | 2401 | 1            | 1    | -0.32          | -0.15           | 22                        | 9                                        | 3UTR         |
| hsa-miR-11400 | NM_001039355 | SLC25A29   | 2217  | 2239 | 1            | 1    | -0.32          | -0.15           | 22                        | 9                                        | 3UTR         |
| hsa-miR-11400 | NM_018155    | SLC25A36   | 1203  | 1224 | 1            | 1    | 1.63           | 1.51            | 21                        | 8                                        | 3UTR         |
| hsa-miR-11400 | NM_001104647 | SLC25A36   | 1206  | 1227 | 1            | 1    | 1.63           | 1.51            | 21                        | 8                                        | 3UTR         |
| hsa-miR-11400 | NM_001286184 | SLC25A44   | 1650  | 1671 | 1            | 1    | 0.23           | 0.28            | 21                        | 9                                        | 3UTR         |
| hsa-miR-11400 | NM_014655    | SLC25A44   | 1626  | 1647 | 1            | 1    | 0.23           | 0.28            | 21                        | 9                                        | 3UTR         |
| hsa-miR-11400 | NM_001012755 | SLC25A53   | 3404  | 3421 | 1            | 1    | 2.71           | 1.12            | 17                        | 8                                        | 3UTR         |
| hsa-miR-11400 | NM_001636    | SLC25A6    | 1374  | 1386 | 1            | 1    | -0.34          | 0.28            | 12                        | 11                                       | 3UTR         |
| hsa-miR-11400 | NM_145176    | SLC2A12    | 5044  | 5060 | 1            | 1    | 1.41           | 2.97            | 16                        | 15                                       | 3UTR         |
| hsa-miR-11400 | NM_006931    | SLC2A3     | 2168  | 2186 | 1            | 1    | 0.36           | 0.92            | 18                        | 11                                       | 3UTR         |
| hsa-miR-11400 | NM_006345    | SLC30A9    | 4906  | 4921 | 1            | 1    | -0.02          | -0.04           | 15                        | 12                                       | 3UTR         |

| mirnaid       | refseqid     | genesymbol | start | end  | binding<br>p | seed | phylopste<br>m | phylopflan<br>k | binding_region_lengt<br>h | longest_<br>consecut<br>ive_pairi<br>ngs | positio<br>n |
|---------------|--------------|------------|-------|------|--------------|------|----------------|-----------------|---------------------------|------------------------------------------|--------------|
| hsa-miR-11400 | NM_004733    | SLC33A1    | 9003  | 9018 | 0.961538     | 1    | 0.00           | 0.24            | 15                        | 14                                       | 3UTR         |
| hsa-miR-11400 | NM_001271684 | SLC35A3    | 2842  | 2861 | 1            | 1    | 0.04           | -0.01           | 19                        | 10                                       | 3UTR         |
| hsa-miR-11400 | NM_001271685 | SLC35A3    | 3056  | 3075 | 1            | 1    | 0.04           | -0.01           | 19                        | 10                                       | 3UTR         |
| hsa-miR-11400 | XM_005270691 | SLC35A3    | 4789  | 4808 | 1            | 1    | 0.00           | 0.00            | 19                        | 10                                       | 3UTR         |
| hsa-miR-11400 | XM_011541136 | SLC35A3    | 3219  | 3238 | 1            | 1    | 0.00           | 0.00            | 19                        | 10                                       | 3UTR         |
| hsa-miR-11400 | XM_017000869 | SLC35A3    | 4567  | 4586 | 1            | 1    | 0.00           | 0.00            | 19                        | 10                                       | 3UTR         |
| hsa-miR-11400 | XM_017000870 | SLC35A3    | 2926  | 2945 | 1            | 1    | 0.00           | 0.00            | 19                        | 10                                       | 3UTR         |
| hsa-miR-11400 | XM_017000871 | SLC35A3    | 4433  | 4452 | 1            | 1    | 0.00           | 0.00            | 19                        | 10                                       | 3UTR         |
| hsa-miR-11400 | NM_012243    | SLC35A3    | 3095  | 3114 | 1            | 1    | 0.04           | -0.01           | 19                        | 10                                       | 3UTR         |
| hsa-miR-11400 | NM_017945    | SLC35A5    | 3893  | 3913 | 1            | 1    | 0.04           | -0.02           | 20                        | 11                                       | 3UTR         |
| hsa-miR-11400 | NM_001348910 | SLC35A5    | 3421  | 3441 | 1            | 1    | 0.04           | -0.02           | 20                        | 11                                       | 3UTR         |
| hsa-miR-11400 | NM_001286511 | SLC35B2    | 1864  | 1879 | 1            | 1    | 1.40           | 1.09            | 15                        | 9                                        | 3UTR         |
| hsa-miR-11400 | NM_001286512 | SLC35B2    | 1849  | 1864 | 1            | 1    | 1.19           | 1.89            | 15                        | 9                                        | 3UTR         |
| hsa-miR-11400 | NM_001286513 | SLC35B2    | 1716  | 1731 | 1            | 1    | 2.20           | 1.24            | 15                        | 9                                        | 3UTR         |
| hsa-miR-11400 | NM_001286517 | SLC35B2    | 1677  | 1692 | 1            | 1    | 4.02           | 2.27            | 15                        | 9                                        | 3UTR         |
| hsa-miR-11400 | NM_001286519 | SLC35B2    | 1522  | 1537 | 1            | 1    | 5.63           | 2.40            | 15                        | 9                                        | 3UTR         |
| hsa-miR-11400 | NM_178148    | SLC35B2    | 1871  | 1886 | 1            | 1    | 2.20           | 1.24            | 15                        | 9                                        | 3UTR         |

| mirnaid       | refseqid     | genesymbol | start | end   | binding<br>p | seed | phylopste<br>m | phylopflan<br>k | binding_region_lengt<br>h | longest_<br>consecut<br>ive_pairi<br>ngs | positio<br>n |
|---------------|--------------|------------|-------|-------|--------------|------|----------------|-----------------|---------------------------|------------------------------------------|--------------|
| hsa-miR-11400 | NM_025181    | SLC35F5    | 4930  | 4948  | 1            | 1    | -0.39          | 0.22            | 18                        | 12                                       | 3UTR         |
| hsa-miR-11400 | XM_005268386 | SLC36A1    | 3046  | 3068  | 1            | 1    | 0.00           | 0.00            | 22                        | 8                                        | 3UTR         |
| hsa-miR-11400 | NM_001278387 | SLC38A1    | 4892  | 4911  | 1            | 1    | 0.23           | 1.14            | 19                        | 15                                       | 3UTR         |
| hsa-miR-11400 | NM_001278388 | SLC38A1    | 4654  | 4673  | 1            | 1    | -0.24          | 0.08            | 19                        | 15                                       | 3UTR         |
| hsa-miR-11400 | NM_030674    | SLC38A1    | 4769  | 4788  | 1            | 1    | 1.74           | 0.77            | 19                        | 15                                       | 3UTR         |
| hsa-miR-11400 | NM_001077484 | SLC38A1    | 4430  | 4449  | 1            | 1    | -0.29          | -0.18           | 19                        | 15                                       | 3UTR         |
| hsa-miR-11400 | NM_015359    | SLC39A14   | 3878  | 3903  | 1            | 1    | 0.32           | -0.17           | 25                        | 13                                       | 3UTR         |
| hsa-miR-11400 | NM_001128431 | SLC39A14   | 3878  | 3903  | 1            | 1    | 0.32           | -0.17           | 25                        | 13                                       | 3UTR         |
| hsa-miR-11400 | NM_001135153 | SLC39A14   | 3947  | 3972  | 1            | 1    | 0.00           | 0.00            | 25                        | 13                                       | 3UTR         |
| hsa-miR-11400 | NM_001198810 | SLC43A1    | 1913  | 1931  | 1            | 1    | 3.15           | 2.85            | 18                        | 8                                        | 3UTR         |
| hsa-miR-11400 | NM_001198810 | SLC43A1    | 2189  | 2237  | 1            | 1    | 7.78           | 3.82            | 16                        | 8                                        | 3UTR         |
| hsa-miR-11400 | NM_199329    | SLC43A3    | 1914  | 1943  | 1            | 1    | 3.83           | 3.10            | 29                        | 8                                        | 3UTR         |
| hsa-miR-11400 | NM_017611    | SLC43A3    | 1892  | 1921  | 1            | 1    | 2.63           | 3.55            | 29                        | 8                                        | 3UTR         |
| hsa-miR-11400 | NM_014096    | SLC43A3    | 2090  | 2119  | 1            | 1    | 3.04           | 1.95            | 29                        | 8                                        | 3UTR         |
| hsa-miR-11400 | NM_001286730 | SLC44A1    | 9404  | 9426  | 1            | 1    | 1.46           | 2.23            | 22                        | 9                                        | 3UTR         |
| hsa-miR-11400 | NM_080546    | SLC44A1    | 10275 | 10297 | 1            | 1    | 1.46           | 2.23            | 22                        | 9                                        | 3UTR         |
| hsa-miR-11400 | NM_001012509 | SLC45A2    | 1869  | 1917  | 1            | 1    | 0.21           | 0.64            | 19                        | 14                                       | 3UTR         |

| mirnaid       | refseqid     | genesymbol | start | end  | binding<br>p | seed | phylopste<br>m | phylopflan<br>k | binding_region_lengt<br>h | longest_<br>consecut<br>ive_pairi<br>ngs | positio<br>n |
|---------------|--------------|------------|-------|------|--------------|------|----------------|-----------------|---------------------------|------------------------------------------|--------------|
| hsa-miR-11400 | NM_001012509 | SLC45A2    | 2335  | 2353 | 1            | 1    | 3.94           | 3.73            | 18                        | 12                                       | 3UTR         |
| hsa-miR-11400 | NM_003759    | SLC4A4     | 3736  | 3757 | 1            | 1    | 0.64           | 0.60            | 21                        | 8                                        | 3UTR         |
| hsa-miR-11400 | NM_001098484 | SLC4A4     | 3783  | 3804 | 1            | 1    | 0.64           | 0.60            | 21                        | 8                                        | 3UTR         |
| hsa-miR-11400 | NM_001370086 | SLC52A3    | 2260  | 2284 | 1            | 1    | 2.45           | 5.16            | 18                        | 7                                        | 3UTR         |
| hsa-miR-11400 | NM_000343    | SLC5A1     | 2201  | 2219 | 1            | 1    | -0.33          | 0.30            | 18                        | 8                                        | 3UTR         |
| hsa-miR-11400 | NM_018057    | SLC6A15    | 3852  | 3873 | 1            | 1    | 0.38           | 0.37            | 21                        | 11                                       | 3UTR         |
| hsa-miR-11400 | NM_001044    | SLC6A3     | 3757  | 3774 | 1            | 1    | -0.35          | -0.16           | 17                        | 16                                       | 3UTR         |
| hsa-miR-11400 | NM_001045    | SLC6A4     | 2323  | 2339 | 1            | 1    | -0.25          | 0.28            | 16                        | 15                                       | 3UTR         |
| hsa-miR-11400 | NM_014228    | SLC6A7     | 2290  | 2307 | 1            | 1    | -0.57          | 0.02            | 17                        | 16                                       | 3UTR         |
| hsa-miR-11400 | NM_003983    | SLC7A6     | 2318  | 2339 | 1            | 1    | 0.60           | 0.39            | 21                        | 11                                       | 3UTR         |
| hsa-miR-11400 | NM_001076785 | SLC7A6     | 2405  | 2426 | 1            | 1    | 0.60           | 0.39            | 21                        | 11                                       | 3UTR         |
| hsa-miR-11400 | NM_032178    | SLC7A6OS   | 3745  | 3765 | 1            | 1    | 2.79           | 0.46            | 20                        | 13                                       | 3UTR         |
| hsa-miR-11400 | XM_006712083 | SLC8A1     | 4605  | 4630 | 0.961538     | 1    | 0.00           | 0.00            | 25                        | 8                                        | 3UTR         |
| hsa-miR-11400 | XM_011533054 | SLC8A1     | 4522  | 4547 | 0.961538     | 1    | 0.00           | 0.00            | 25                        | 8                                        | 3UTR         |
| hsa-miR-11400 | NM_001351494 | SLC8A1     | 4583  | 4608 | 1            | 1    | 0.33           | 0.09            | 25                        | 8                                        | 3UTR         |
| hsa-miR-11400 | NM_134431    | SLCO1A2    | 5914  | 5936 | 1            | 1    | 2.89           | 2.96            | 22                        | 15                                       | 3UTR         |
| hsa-miR-11400 | NM_134431    | SLCO1A2    | 3988  | 4019 | 1            | 1    | 0.12           | 0.25            | 31                        | 11                                       | 3UTR         |

| mirnaid       | refseqid     | genesymbol | start | end  | binding<br>p | seed | phylopste<br>m | phylopflan<br>k | binding_region_lengt<br>h | longest_<br>consecut<br>ive_pairi<br>ngs | positio<br>n |
|---------------|--------------|------------|-------|------|--------------|------|----------------|-----------------|---------------------------|------------------------------------------|--------------|
| hsa-miR-11400 | XM_011520818 | SLCO1A2    | 5342  | 5364 | 1            | 1    | 0.00           | 0.00            | 22                        | 15                                       | 3UTR         |
| hsa-miR-11400 | XM_011520818 | SLCO1A2    | 4433  | 4453 | 1            | 1    | 0.00           | 0.00            | 20                        | 8                                        | 3UTR         |
| hsa-miR-11400 | XM_011520818 | SLCO1A2    | 3416  | 3447 | 1            | 1    | 0.00           | 0.00            | 31                        | 11                                       | 3UTR         |
| hsa-miR-11400 | NM_030958    | SLCO5A1    | 3271  | 3313 | 1            | 1    | 0.03           | 0.17            | 20                        | 11                                       | 3UTR         |
| hsa-miR-11400 | NM_001146008 | SLCO5A1    | 3267  | 3309 | 1            | 1    | -0.03          | 0.19            | 20                        | 11                                       | 3UTR         |
| hsa-miR-11400 | NM_001146009 | SLCO5A1    | 2981  | 3023 | 1            | 1    | 0.40           | 0.48            | 20                        | 11                                       | 3UTR         |
| hsa-miR-11400 | NM_152270    | SLFN11     | 4036  | 4056 | 1            | 1    | 3.22           | 0.39            | 20                        | 9                                        | 3UTR         |
| hsa-miR-11400 | NM_001104590 | SLFN11     | 4143  | 4163 | 1            | 1    | 0.10           | 0.52            | 20                        | 9                                        | 3UTR         |
| hsa-miR-11400 | NM_144682    | SLFN13     | 4375  | 4395 | 1            | 1    | 0.05           | 0.02            | 20                        | 9                                        | 3UTR         |
| hsa-miR-11400 | NM_144682    | SLFN13     | 3925  | 3950 | 1            | 1    | -0.02          | -0.02           | 25                        | 8                                        | 3UTR         |
| hsa-miR-11400 | XM_005257922 | SLFN13     | 3977  | 4002 | 1            | 1    | 0.00           | 0.00            | 25                        | 8                                        | 3UTR         |
| hsa-miR-11400 | XM_005257922 | SLFN13     | 3909  | 3928 | 1            | 1    | 0.00           | 0.00            | 19                        | 10                                       | 3UTR         |
| hsa-miR-11400 | XM_011524383 | SLFN13     | 3402  | 3422 | 1            | 1    | 0.00           | 0.00            | 20                        | 9                                        | 3UTR         |
| hsa-miR-11400 | XM_011524383 | SLFN13     | 2952  | 2977 | 1            | 1    | 0.00           | 0.00            | 25                        | 8                                        | 3UTR         |
| hsa-miR-11400 | NM_001271946 | SLIT3      | 6993  | 7015 | 0.961538     | 1    | 3.25           | 4.16            | 22                        | 10                                       | 3UTR         |
| hsa-miR-11400 | NM_003062    | SLIT3      | 6972  | 6994 | 0.961538     | 1    | 3.25           | 4.16            | 22                        | 10                                       | 3UTR         |
| hsa-miR-11400 | XM_017009779 | SLIT3      | 6365  | 6387 | 1            | 1    | 0.00           | 0.00            | 22                        | 10                                       | 3UTR         |



| mirnaid       | refseqid     | genesymbol | start | end   | binding<br>p | seed | phylopste<br>m | phylopflan<br>k | binding_region_lengt<br>h | longest_<br>consecut<br>ive_pairi<br>ngs | positio<br>n |
|---------------|--------------|------------|-------|-------|--------------|------|----------------|-----------------|---------------------------|------------------------------------------|--------------|
| hsa-miR-11400 | NM_052910    | SLITRK1    | 3395  | 3430  | 1            | 1    | 3.37           | 3.45            | 21                        | 11                                       | 3UTR         |
| hsa-miR-11400 | NM_005901    | SMAD2      | 24222 | 24242 | 1            | 1    | 1.72           | 1.05            | 20                        | 16                                       | 3UTR         |
| hsa-miR-11400 | NM_005901    | SMAD2      | 29286 | 29308 | 1            | 1    | 0.05           | 0.15            | 22                        | 9                                        | 3UTR         |
| hsa-miR-11400 | NM_001003652 | SMAD2      | 23996 | 24016 | 1            | 1    | 0.01           | -0.01           | 20                        | 16                                       | 3UTR         |
| hsa-miR-11400 | NM_001003652 | SMAD2      | 29060 | 29082 | 1            | 1    | 0.28           | 0.43            | 22                        | 9                                        | 3UTR         |
| hsa-miR-11400 | NM_001135937 | SMAD2      | 23906 | 23926 | 1            | 1    | 0.00           | 0.00            | 20                        | 16                                       | 3UTR         |
| hsa-miR-11400 | NM_001135937 | SMAD2      | 28970 | 28992 | 1            | 1    | 0.00           | 0.00            | 22                        | 9                                        | 3UTR         |
| hsa-miR-11400 | NM_001145104 | SMAD3      | 5082  | 5100  | 1            | 1    | -0.18          | 0.02            | 18                        | 8                                        | 3UTR         |
| hsa-miR-11400 | XM_024446047 | SMAD5      | 3445  | 3463  | 1            | 1    | 0.00           | 0.00            | 18                        | 10                                       | 3UTR         |
| hsa-miR-11400 | NM_005903    | SMAD5      | 2515  | 2533  | 1            | 1    | 0.99           | 1.03            | 18                        | 10                                       | 3UTR         |
| hsa-miR-11400 | NM_001001420 | SMAD5      | 2440  | 2458  | 1            | 1    | 0.99           | 1.03            | 18                        | 10                                       | 3UTR         |
| hsa-miR-11400 | NM_001317946 | SMARCB1    | 4494  | 4511  | 1            | 1    | -0.06          | -0.46           | 17                        | 16                                       | 3UTR         |
| hsa-miR-11400 | NM_001007468 | SMARCB1    | 4440  | 4457  | 1            | 1    | -0.06          | -0.46           | 17                        | 16                                       | 3UTR         |
| hsa-miR-11400 | NM_001077657 | SMCO1      | 914   | 942   | 1            | 1    | 0.33           | 0.06            | 28                        | 6                                        | 3UTR         |
| hsa-miR-11400 | NM_138428    | SMIM12     | 2886  | 2916  | 1            | 1    | -0.10          | -0.20           | 17                        | 15                                       | 3UTR         |
| hsa-miR-11400 | XM_005270403 | SMIM12     | 3436  | 3466  | 1            | 1    | 0.00           | 0.00            | 17                        | 15                                       | 3UTR         |
| hsa-miR-11400 | NM_001320261 | SMIM12     | 2911  | 2941  | 1            | 1    | -0.24          | -0.17           | 17                        | 15                                       | 3UTR         |

| mirnaid       | refseqid     | genesymbol | start | end  | binding<br>p | seed | phylopste<br>m | phylopflan<br>k | binding_region_lengt<br>h | longest_<br>consecut<br>ive_pairi<br>ngs | positio<br>n |
|---------------|--------------|------------|-------|------|--------------|------|----------------|-----------------|---------------------------|------------------------------------------|--------------|
| hsa-miR-11400 | NM_001164824 | SMIM12     | 3203  | 3233 | 1            | 1    | -0.46          | 0.10            | 17                        | 15                                       | 3UTR         |
| hsa-miR-11400 | NM_001164825 | SMIM12     | 3108  | 3138 | 1            | 1    | -0.71          | 0.13            | 17                        | 15                                       | 3UTR         |
| hsa-miR-11400 | NM_024104    | SMIM7      | 762   | 789  | 1            | 1    | -0.18          | -0.19           | 17                        | 7                                        | 3UTR         |
| hsa-miR-11400 | NM_001297715 | SMN1       | 1251  | 1273 | 1            | 1    | -0.18          | -0.14           | 22                        | 8                                        | 3UTR         |
| hsa-miR-11400 | XM_011543597 | SMN1       | 989   | 1011 | 1            | 1    | 0.00           | 0.00            | 22                        | 8                                        | 3UTR         |
| hsa-miR-11400 | NM_022874    | SMN1       | 1209  | 1231 | 1            | 1    | -0.18          | -0.14           | 22                        | 8                                        | 3UTR         |
| hsa-miR-11400 | NM_000344    | SMN1       | 1159  | 1181 | 1            | 1    | 3.32           | 2.97            | 22                        | 8                                        | 3UTR         |
| hsa-miR-11400 | XM_011543600 | SMN2       | 989   | 1011 | 1            | 1    | 0.00           | 0.00            | 22                        | 8                                        | 3UTR         |
| hsa-miR-11400 | NM_017411    | SMN2       | 1159  | 1181 | 1            | 1    | -0.18          | -0.14           | 22                        | 8                                        | 3UTR         |
| hsa-miR-11400 | NM_022875    | SMN2       | 1105  | 1127 | 1            | 1    | -0.18          | -0.14           | 22                        | 8                                        | 3UTR         |
| hsa-miR-11400 | NM_022876    | SMN2       | 1209  | 1231 | 1            | 1    | -0.18          | -0.14           | 22                        | 8                                        | 3UTR         |
| hsa-miR-11400 | NM_005871    | SMNDC1     | 2945  | 2965 | 1            | 1    | 0.30           | 0.63            | 20                        | 9                                        | 3UTR         |
| hsa-miR-11400 | NM_018667    | SMPD3      | 2495  | 2517 | 1            | 1    | 2.62           | 2.48            | 22                        | 7                                        | 3UTR         |
| hsa-miR-11400 | NM_004782    | SNAP29     | 2673  | 2701 | 1            | 1    | -0.54          | -0.17           | 28                        | 10                                       | 3UTR         |
| hsa-miR-11400 | XM_017015056 | SNAPC3     | 3598  | 3635 | 1            | 1    | 0.00           | 0.00            | 16                        | 11                                       | 3UTR         |
| hsa-miR-11400 | NM_000345    | SNCA       | 2411  | 2429 | 0.961538     | 1    | 2.42           | 1.87            | 18                        | 10                                       | 3UTR         |
| hsa-miR-11400 | NM_001375290 | SNCA       | 2212  | 2236 | 1            | 1    | 2.55           | 1.95            | 19                        | 10                                       | 3UTR         |

| mirnaid       | refseqid     | genesymbol | start | end   | binding<br>p | seed | phylopste<br>m | phylopflan<br>k | binding_region_lengt<br>h | longest_<br>consecut<br>ive_pairi<br>ngs | positio<br>n |
|---------------|--------------|------------|-------|-------|--------------|------|----------------|-----------------|---------------------------|------------------------------------------|--------------|
| hsa-miR-11400 | NM_001146054 | SNCA       | 2630  | 2648  | 1            | 1    | 0.90           | 2.81            | 18                        | 10                                       | 3UTR         |
| hsa-miR-11400 | NM_001146055 | SNCA       | 2258  | 2282  | 1            | 1    | 2.66           | 2.37            | 19                        | 10                                       | 3UTR         |
| hsa-miR-11400 | NM_024700    | SNIP1      | 2784  | 2807  | 1            | 1    | 1.07           | 1.10            | 23                        | 8                                        | 3UTR         |
| hsa-miR-11400 | NM_006938    | SNRPD1     | 2024  | 2049  | 1            | 1    | -0.10          | 0.04            | 25                        | 8                                        | 3UTR         |
| hsa-miR-11400 | NM_006938    | SNRPD1     | 825   | 859   | 1            | 1    | 0.12           | 0.12            | 34                        | 11                                       | 3UTR         |
| hsa-miR-11400 | NM_021021    | SNTB1      | 2176  | 2198  | 1            | 1    | 0.18           | 0.25            | 22                        | 9                                        | 3UTR         |
| hsa-miR-11400 | NM_006750    | SNTB2      | 7513  | 7532  | 1            | 1    | -0.52          | -0.01           | 19                        | 10                                       | 3UTR         |
| hsa-miR-11400 | NM_005008    | SNU13      | 1483  | 1514  | 1            | 1    | 0.28           | -0.03           | 31                        | 9                                        | 3UTR         |
| hsa-miR-11400 | NM_148955    | SNX1       | 4122  | 4140  | 1            | 1    | 0.63           | 0.25            | 18                        | 8                                        | 3UTR         |
| hsa-miR-11400 | XM_005257262 | SNX11      | 1918  | 1938  | 0.961538     | 1    | 0.00           | 0.00            | 20                        | 6                                        | 3UTR         |
| hsa-miR-11400 | XM_011524697 | SNX11      | 1960  | 1980  | 0.961538     | 1    | 0.00           | 0.00            | 20                        | 6                                        | 3UTR         |
| hsa-miR-11400 | NM_001256185 | SNX12      | 982   | 1003  | 1            | 1    | 0.43           | 0.68            | 21                        | 13                                       | 3UTR         |
| hsa-miR-11400 | NM_001256188 | SNX12      | 832   | 853   | 1            | 1    | 1.27           | 0.74            | 21                        | 13                                       | 3UTR         |
| hsa-miR-11400 | NM_001347927 | SNX19      | 10418 | 10448 | 1            | 1    | -0.70          | -0.42           | 22                        | 11                                       | 3UTR         |
| hsa-miR-11400 | NM_001144972 | SNX20      | 1109  | 1127  | 1            | 1    | -0.57          | -0.27           | 18                        | 14                                       | 3UTR         |
| hsa-miR-11400 | XM_017022581 | SNX22      | 2622  | 2642  | 0.961538     | 1    | 0.00           | 0.00            | 20                        | 14                                       | 3UTR         |
| hsa-miR-11400 | NM_024798    | SNX22      | 2682  | 2702  | 1            | 1    | -0.36          | -0.15           | 20                        | 14                                       | 3UTR         |

| mirnaid       | refseqid     | genesymbol | start | end   | binding<br>p | seed | phylopste<br>m | phylopflan<br>k | binding_region_lengt<br>h | longest_<br>consecut<br>ive_pairi<br>ngs | positio<br>n |
|---------------|--------------|------------|-------|-------|--------------|------|----------------|-----------------|---------------------------|------------------------------------------|--------------|
| hsa-miR-11400 | NM_030918    | SNX27      | 5492  | 5513  | 1            | 1    | -0.53          | -0.23           | 21                        | 11                                       | 3UTR         |
| hsa-miR-11400 | XM_005245510 | SNX27      | 4311  | 4332  | 1            | 1    | 0.00           | 0.00            | 21                        | 11                                       | 3UTR         |
| hsa-miR-11400 | XM_017002417 | SNX27      | 5057  | 5078  | 1            | 1    | 0.00           | 0.00            | 21                        | 11                                       | 3UTR         |
| hsa-miR-11400 | NM_001330723 | SNX27      | 4715  | 4736  | 1            | 1    | -0.53          | -0.23           | 21                        | 11                                       | 3UTR         |
| hsa-miR-11400 | NM_152238    | SNX7       | 1422  | 1441  | 1            | 1    | 0.65           | 0.88            | 19                        | 8                                        | 3UTR         |
| hsa-miR-11400 | NM_015976    | SNX7       | 1587  | 1606  | 1            | 1    | 0.65           | 0.88            | 19                        | 8                                        | 3UTR         |
| hsa-miR-11400 | XM_017026086 | SOCS6      | 4569  | 4593  | 1            | 1    | 0.00           | 0.00            | 17                        | 15                                       | 3UTR         |
| hsa-miR-11400 | NM_004232    | SOCS6      | 4419  | 4443  | 1            | 1    | 0.01           | 0.04            | 17                        | 15                                       | 3UTR         |
| hsa-miR-11400 | NM_001322814 | SOD2       | 11732 | 11750 | 0.961538     | 1    | -0.32          | 0.01            | 18                        | 8                                        | 3UTR         |
| hsa-miR-11400 | NM_001322814 | SOD2       | 4911  | 4930  | 1            | 1    | 0.13           | -0.02           | 19                        | 12                                       | 3UTR         |
| hsa-miR-11400 | NM_001322815 | SOD2       | 4848  | 4867  | 1            | 1    | -0.12          | 0.02            | 19                        | 12                                       | 3UTR         |
| hsa-miR-11400 | NM_000636    | SOD2       | 5028  | 5047  | 1            | 1    | 0.13           | 0.01            | 19                        | 12                                       | 3UTR         |
| hsa-miR-11400 | NM_002959    | SORT1      | 2959  | 3009  | 1            | 1    | 1.05           | 1.06            | 24                        | 8                                        | 3UTR         |
| hsa-miR-11400 | NM_001205228 | SORT1      | 2733  | 2783  | 1            | 1    | 0.00           | 0.00            | 24                        | 8                                        | 3UTR         |
| hsa-miR-11400 | NM_025237    | SOST       | 894   | 942   | 1            | 1    | -0.37          | 0.01            | 21                        | 8                                        | 3UTR         |
| hsa-miR-11400 | NM_007084    | SOX21      | 1464  | 1485  | 1            | 1    | 1.22           | 0.30            | 21                        | 7                                        | 3UTR         |
| hsa-miR-11400 | NM_001261414 | SOX5       | 2774  | 2791  | 1            | 1    | 3.96           | 1.74            | 17                        | 11                                       | 3UTR         |

| mirnaid       | refseqid     | genesymbol | start | end  | binding<br>p | seed | phylopste<br>m | phylopflan<br>k | binding_region_lengt<br>h | longest_<br>consecut<br>ive_pairi<br>ngs | positio<br>n |
|---------------|--------------|------------|-------|------|--------------|------|----------------|-----------------|---------------------------|------------------------------------------|--------------|
| hsa-miR-11400 | NM_001261415 | SOX5       | 2667  | 2684 | 1            | 1    | 3.39           | 3.10            | 17                        | 11                                       | 3UTR         |
| hsa-miR-11400 | NM_178010    | SOX5       | 1522  | 1539 | 1            | 1    | 0.51           | 1.10            | 17                        | 11                                       | 3UTR         |
| hsa-miR-11400 | NM_006940    | SOX5       | 2715  | 2732 | 1            | 1    | 3.45           | 2.57            | 17                        | 11                                       | 3UTR         |
| hsa-miR-11400 | NM_001330785 | SOX5       | 2610  | 2627 | 1            | 1    | 2.27           | 4.31            | 17                        | 11                                       | 3UTR         |
| hsa-miR-11400 | NM_138473    | SP1        | 4821  | 4846 | 1            | 1    | 0.33           | 0.74            | 25                        | 10                                       | 3UTR         |
| hsa-miR-11400 | NM_003109    | SP1        | 4739  | 4764 | 1            | 1    | 0.33           | 0.74            | 25                        | 10                                       | 3UTR         |
| hsa-miR-11400 | NM_001080391 | SP100      | 4593  | 4626 | 1            | 1    | 0.08           | -0.03           | 33                        | 8                                        | 3UTR         |
| hsa-miR-11400 | NM_199262    | SP6        | 1268  | 1286 | 1            | 1    | -0.36          | -0.25           | 18                        | 11                                       | 3UTR         |
| hsa-miR-11400 | NM_182700    | SP8        | 3129  | 3144 | 1            | 1    | 2.18           | 1.27            | 15                        | 9                                        | 3UTR         |
| hsa-miR-11400 | NM_198956    | SP8        | 3225  | 3240 | 1            | 1    | 2.26           | 1.31            | 15                        | 9                                        | 3UTR         |
| hsa-miR-11400 | NM_058206    | SPAG11B    | 317   | 360  | 1            | 1    | 1.44           | 0.30            | 21                        | 10                                       | 3UTR         |
| hsa-miR-11400 | NM_138796    | SPATA17    | 2371  | 2394 | 1            | 1    | 0.01           | -0.07           | 23                        | 7                                        | 3UTR         |
| hsa-miR-11400 | NM_001145197 | SPATA31D4  | 4057  | 4074 | 1            | 1    | -0.71          | -0.79           | 17                        | 9                                        | 3UTR         |
| hsa-miR-11400 | NM_001353486 | SPATA6L    | 2290  | 2310 | 1            | 1    | 0.18           | 0.83            | 20                        | 6                                        | 3UTR         |
| hsa-miR-11400 | NM_198572    | SPATC1     | 2046  | 2066 | 1            | 1    | -0.68          | -0.17           | 20                        | 10                                       | 3UTR         |
| hsa-miR-11400 | NM_001134374 | SPATC1     | 1906  | 1926 | 1            | 1    | -0.68          | -0.17           | 20                        | 10                                       | 3UTR         |
| hsa-miR-11400 | NM_145026    | SPATS1     | 2782  | 2811 | 1            | 1    | 0.10           | -0.09           | 21                        | 11                                       | 3UTR         |

| mirnaid       | refseqid     | genesymbol | start | end  | binding<br>p | seed | phylopste<br>m | phylopflan<br>k | binding_region_lengt<br>h | longest_<br>consecut<br>ive_pairi<br>ngs | positio<br>n |
|---------------|--------------|------------|-------|------|--------------|------|----------------|-----------------|---------------------------|------------------------------------------|--------------|
| hsa-miR-11400 | NM_001372081 | SPATS1     | 2790  | 2819 | 1            | 1    | 0.10           | -0.09           | 21                        | 11                                       | 3UTR         |
| hsa-miR-11400 | NM_014752    | SPCS2      | 1742  | 1782 | 1            | 1    | 0.21           | 0.21            | 20                        | 7                                        | 3UTR         |
| hsa-miR-11400 | NM_152904    | SPECC1     | 3977  | 3997 | 0.980769     | 1    | -0.82          | -0.20           | 20                        | 9                                        | 3UTR         |
| hsa-miR-11400 | NM_001033554 | SPECC1     | 3808  | 3828 | 0.980769     | 1    | -0.82          | -0.20           | 20                        | 9                                        | 3UTR         |
| hsa-miR-11400 | NM_001243438 | SPECC1     | 3817  | 3837 | 1            | 1    | 0.00           | 0.00            | 20                        | 9                                        | 3UTR         |
| hsa-miR-11400 | NM_020148    | SPIRE1     | 2909  | 2928 | 1            | 1    | 1.40           | 0.55            | 19                        | 6                                        | 3UTR         |
| hsa-miR-11400 | NM_001128626 | SPIRE1     | 2951  | 2970 | 1            | 1    | 0.27           | 0.72            | 19                        | 6                                        | 3UTR         |
| hsa-miR-11400 | NM_001030288 | SPN        | 6839  | 6864 | 0.961538     | 1    | -0.05          | -0.07           | 25                        | 8                                        | 3UTR         |
| hsa-miR-11400 | NM_001030288 | SPN        | 3908  | 3926 | 1            | 1    | -0.04          | -0.01           | 18                        | 6                                        | 3UTR         |
| hsa-miR-11400 | XM_011532018 | SPOCK3     | 1896  | 1921 | 1            | 1    | 0.00           | 0.00            | 25                        | 7                                        | 3UTR         |
| hsa-miR-11400 | XM_017008257 | SPOCK3     | 1820  | 1845 | 1            | 1    | 0.00           | 0.00            | 25                        | 7                                        | 3UTR         |
| hsa-miR-11400 | XM_017008258 | SPOCK3     | 1960  | 1985 | 1            | 1    | 0.00           | 0.00            | 25                        | 7                                        | 3UTR         |
| hsa-miR-11400 | NM_001251967 | SPOCK3     | 1544  | 1569 | 1            | 1    | 0.00           | 0.00            | 25                        | 7                                        | 3UTR         |
| hsa-miR-11400 | NM_032802    | SPPL2A     | 6633  | 6654 | 1            | 1    | 2.25           | 2.19            | 21                        | 8                                        | 3UTR         |
| hsa-miR-11400 | NM_001042522 | SPRED3     | 4485  | 4506 | 1            | 1    | 1.40           | 1.48            | 21                        | 11                                       | 3UTR         |
| hsa-miR-11400 | NM_024738    | SPRING1    | 8131  | 8148 | 1            | 1    | 4.01           | 3.69            | 17                        | 11                                       | 3UTR         |
| hsa-miR-11400 | NM_001304990 | SPRY3      | 5261  | 5282 | 1            | 1    | 0.29           | 0.15            | 21                        | 12                                       | 3UTR         |

| mirnaid       | refseqid     | genesymbol | start | end   | binding<br>p | seed | phylopste<br>m | phylopflan<br>k | binding_region_lengt<br>h | longest_<br>consecut<br>ive_pairi<br>ngs | positio<br>n |
|---------------|--------------|------------|-------|-------|--------------|------|----------------|-----------------|---------------------------|------------------------------------------|--------------|
| hsa-miR-11400 | NM_005840    | SPRY3      | 5405  | 5426  | 1            | 1    | 0.00           | 0.00            | 21                        | 12                                       | 3UTR         |
| hsa-miR-11400 | NM_032840    | SPRYD3     | 2571  | 2596  | 0.961538     | 1    | 4.17           | 4.37            | 25                        | 11                                       | 3UTR         |
| hsa-miR-11400 | NM_207344    | SPRYD4     | 10252 | 10291 | 1            | 1    | 0.59           | 2.56            | 22                        | 10                                       | 3UTR         |
| hsa-miR-11400 | NM_025106    | SPSB1      | 1407  | 1437  | 1            | 1    | 0.54           | -0.02           | 30                        | 10                                       | 3UTR         |
| hsa-miR-11400 | NM_001355436 | SPTB       | 7632  | 7653  | 1            | 1    | 1.14           | 2.15            | 21                        | 10                                       | 3UTR         |
| hsa-miR-11400 | NM_001024858 | SPTB       | 7751  | 7772  | 1            | 1    | 3.93           | 1.51            | 21                        | 10                                       | 3UTR         |
| hsa-miR-11400 | NM_178324    | SPTLC1     | 870   | 895   | 1            | 1    | 4.02           | 3.49            | 25                        | 8                                        | 3UTR         |
| hsa-miR-11400 | XM_024453379 | SPTSSB     | 794   | 835   | 0.980769     | 1    | 0.00           | 0.00            | 20                        | 11                                       | 3UTR         |
| hsa-miR-11400 | NM_001040100 | SPTSSB     | 1206  | 1225  | 1            | 1    | 0.30           | 0.39            | 19                        | 11                                       | 3UTR         |
| hsa-miR-11400 | NM_030572    | SPX        | 669   | 689   | 0.961538     | 1    | 0.63           | 0.15            | 20                        | 11                                       | 3UTR         |
| hsa-miR-11400 | NM_032567    | SPZ1       | 1735  | 1778  | 1            | 1    | 0.10           | -0.13           | 14                        | 6                                        | 3UTR         |
| hsa-miR-11400 | NM_198291    | SRC        | 4407  | 4428  | 1            | 1    | 0.04           | -0.28           | 21                        | 10                                       | 3UTR         |
| hsa-miR-11400 | NM_173829    | SREK1IP1   | 3744  | 3774  | 1            | 1    | 0.60           | 0.28            | 30                        | 11                                       | 3UTR         |
| hsa-miR-11400 | NM_173829    | SREK1IP1   | 6177  | 6206  | 1            | 1    | 0.36           | 1.09            | 29                        | 8                                        | 3UTR         |
| hsa-miR-11400 | XM_017023528 | SRL        | 3127  | 3143  | 1            | 1    | 0.00           | 0.00            | 16                        | 11                                       | 3UTR         |
| hsa-miR-11400 | NM_003137    | SRPK1      | 3374  | 3399  | 1            | 1    | 2.15           | 2.38            | 25                        | 12                                       | 3UTR         |
| hsa-miR-11400 | NM_003139    | SRPRA      | 2438  | 2453  | 1            | 1    | 4.13           | 3.88            | 15                        | 14                                       | 3UTR         |

| mirnaid       | refseqid     | genesymbol | start | end   | binding<br>p | seed | phylopste<br>m | phylopflan<br>k | binding_region_lengt<br>h | longest_<br>consecut<br>ive_pairi<br>ngs | positio<br>n |
|---------------|--------------|------------|-------|-------|--------------|------|----------------|-----------------|---------------------------|------------------------------------------|--------------|
| hsa-miR-11400 | NM_001177842 | SRPRA      | 2354  | 2369  | 1            | 1    | 1.12           | 2.25            | 15                        | 14                                       | 3UTR         |
| hsa-miR-11400 | NM_001013694 | SRRD       | 1579  | 1598  | 1            | 1    | 3.67           | 4.04            | 19                        | 9                                        | 3UTR         |
| hsa-miR-11400 | NM_006275    | SRSF6      | 4185  | 4213  | 1            | 1    | 0.13           | -0.15           | 28                        | 10                                       | 3UTR         |
| hsa-miR-11400 | NM_001256733 | SSBP2      | 3309  | 3328  | 1            | 1    | 0.03           | 0.04            | 19                        | 10                                       | 3UTR         |
| hsa-miR-11400 | NM_001256734 | SSBP2      | 3303  | 3322  | 1            | 1    | 0.02           | 0.03            | 19                        | 10                                       | 3UTR         |
| hsa-miR-11400 | NM_001256735 | SSBP2      | 3279  | 3298  | 1            | 1    | 0.01           | 0.04            | 19                        | 10                                       | 3UTR         |
| hsa-miR-11400 | NM_001256736 | SSBP2      | 3180  | 3199  | 1            | 1    | 0.00           | 0.00            | 19                        | 10                                       | 3UTR         |
| hsa-miR-11400 | XM_017009309 | SSBP2      | 3536  | 3555  | 1            | 1    | 0.00           | 0.00            | 19                        | 10                                       | 3UTR         |
| hsa-miR-11400 | NM_018984    | SSH1       | 12327 | 12352 | 0.961538     | 1    | 4.58           | 4.82            | 25                        | 8                                        | 3UTR         |
| hsa-miR-11400 | NM_005086    | SSPN       | 3392  | 3405  | 1            | 1    | 1.89           | 1.93            | 13                        | 12                                       | 3UTR         |
| hsa-miR-11400 | NM_001135823 | SSPN       | 3209  | 3222  | 1            | 1    | 1.89           | 1.93            | 13                        | 12                                       | 3UTR         |
| hsa-miR-11400 | NM_001292008 | SSR1       | 3898  | 3921  | 1            | 1    | 0.06           | 0.12            | 23                        | 7                                        | 3UTR         |
| hsa-miR-11400 | NM_003144    | SSR1       | 4102  | 4125  | 1            | 1    | 0.16           | -0.05           | 23                        | 7                                        | 3UTR         |
| hsa-miR-11400 | NM_001308197 | SSR3       | 2655  | 2687  | 1            | 1    | 0.05           | 0.01            | 22                        | 17                                       | 3UTR         |
| hsa-miR-11400 | NM_001308197 | SSR3       | 2965  | 2982  | 1            | 1    | 0.29           | 0.64            | 17                        | 13                                       | 3UTR         |
| hsa-miR-11400 | NM_001308204 | SSR3       | 2564  | 2596  | 1            | 1    | 0.16           | -0.08           | 22                        | 17                                       | 3UTR         |
| hsa-miR-11400 | NM_001308204 | SSR3       | 2874  | 2891  | 1            | 1    | 0.27           | 0.34            | 17                        | 13                                       | 3UTR         |



| mirnaid       | refseqid     | genesymbol | start | end  | binding<br>p | seed | phylopste<br>m | phylopflan<br>k | binding_region_lengt<br>h | longest_<br>consecut<br>ive_pairi<br>ngs | positio<br>n |
|---------------|--------------|------------|-------|------|--------------|------|----------------|-----------------|---------------------------|------------------------------------------|--------------|
| hsa-miR-11400 | NM_001308205 | SSR3       | 2588  | 2620 | 1            | 1    | 0.05           | 0.05            | 22                        | 17                                       | 3UTR         |
| hsa-miR-11400 | NM_001308205 | SSR3       | 2898  | 2915 | 1            | 1    | 0.38           | 0.50            | 17                        | 13                                       | 3UTR         |
| hsa-miR-11400 | NM_007107    | SSR3       | 2616  | 2648 | 1            | 1    | -0.05          | 0.04            | 22                        | 17                                       | 3UTR         |
| hsa-miR-11400 | NM_152996    | ST6GALNAC3 | 4548  | 4571 | 1            | 1    | 1.10           | 0.79            | 23                        | 7                                        | 3UTR         |
| hsa-miR-11400 | NM_001286999 | ST6GALNAC6 | 1630  | 1664 | 1            | 1    | 1.88           | 3.38            | 19                        | 8                                        | 3UTR         |
| hsa-miR-11400 | NM_001287001 | ST6GALNAC6 | 1665  | 1683 | 1            | 1    | 1.81           | 2.85            | 18                        | 8                                        | 3UTR         |
| hsa-miR-11400 | NM_013443    | ST6GALNAC6 | 1634  | 1668 | 1            | 1    | 1.88           | 3.38            | 19                        | 8                                        | 3UTR         |
| hsa-miR-11400 | NM_003034    | ST8SIA1    | 7730  | 7750 | 1            | 1    | 0.96           | 0.59            | 20                        | 8                                        | 3UTR         |
| hsa-miR-11400 | NM_006011    | ST8SIA2    | 2797  | 2814 | 1            | 1    | 0.10           | 0.57            | 17                        | 9                                        | 3UTR         |
| hsa-miR-11400 | NM_001330416 | ST8SIA2    | 2734  | 2751 | 1            | 1    | 0.55           | 0.49            | 17                        | 9                                        | 3UTR         |
| hsa-miR-11400 | NM_001307987 | ST8SIA5    | 3841  | 3865 | 1            | 1    | -0.38          | 0.00            | 24                        | 9                                        | 3UTR         |
| hsa-miR-11400 | NM_013305    | ST8SIA5    | 3934  | 3958 | 1            | 1    | 0.41           | 0.04            | 24                        | 9                                        | 3UTR         |
| hsa-miR-11400 | NM_181900    | STARD5     | 1678  | 1709 | 1            | 1    | 0.33           | -0.26           | 18                        | 16                                       | 3UTR         |
| hsa-miR-11400 | NM_181900    | STARD5     | 4709  | 4729 | 1            | 1    | 3.03           | 2.38            | 20                        | 9                                        | 3UTR         |
| hsa-miR-11400 | NM_001178080 | STAT6      | 2803  | 2829 | 1            | 1    | 2.74           | 3.55            | 26                        | 8                                        | 3UTR         |
| hsa-miR-11400 | NM_001205316 | STEAP4     | 8248  | 8266 | 1            | 1    | 0.00           | 0.00            | 18                        | 12                                       | 3UTR         |
| hsa-miR-11400 | NM_001382581 | STIM1      | 2773  | 2809 | 1            | 1    | 0.74           | 0.67            | 21                        | 7                                        | 3UTR         |

| mirnaid       | refseqid     | genesymbol | start | end  | binding<br>p | seed | phylopste<br>m | phylopflan<br>k | binding_region_lengt<br>h | longest_<br>consecut<br>ive_pairi<br>ngs | positio<br>n |
|---------------|--------------|------------|-------|------|--------------|------|----------------|-----------------|---------------------------|------------------------------------------|--------------|
| hsa-miR-11400 | NM_001271979 | STK25      | 2008  | 2026 | 1            | 1    | -0.23          | -0.23           | 18                        | 9                                        | 3UTR         |
| hsa-miR-11400 | NM_001271980 | STK25      | 1946  | 1964 | 1            | 1    | 0.23           | -0.22           | 18                        | 9                                        | 3UTR         |
| hsa-miR-11400 | NM_001282305 | STK25      | 2317  | 2335 | 1            | 1    | -0.42          | -0.26           | 18                        | 9                                        | 3UTR         |
| hsa-miR-11400 | NM_007271    | STK38      | 2696  | 2712 | 1            | 1    | 4.56           | 5.40            | 16                        | 15                                       | 3UTR         |
| hsa-miR-11400 | NM_001256674 | STOML1     | 5541  | 5562 | 1            | 1    | 2.81           | 3.10            | 21                        | 12                                       | 3UTR         |
| hsa-miR-11400 | NM_001256675 | STOML1     | 5481  | 5502 | 1            | 1    | 3.23           | 3.45            | 21                        | 12                                       | 3UTR         |
| hsa-miR-11400 | NM_004809    | STOML1     | 5694  | 5715 | 1            | 1    | 3.23           | 3.45            | 21                        | 12                                       | 3UTR         |
| hsa-miR-11400 | NM_007178    | STRAP      | 1406  | 1441 | 1            | 1    | 2.51           | 1.33            | 21                        | 7                                        | 3UTR         |
| hsa-miR-11400 | XM_017026717 | STRN4      | 2329  | 2378 | 1            | 1    | 0.00           | 0.00            | 19                        | 8                                        | 3UTR         |
| hsa-miR-11400 | NM_003764    | STX11      | 3487  | 3504 | 1            | 1    | 0.17           | -0.07           | 17                        | 8                                        | 3UTR         |
| hsa-miR-11400 | NM_003763    | STX16      | 1718  | 1734 | 1            | 1    | 0.49           | 0.03            | 16                        | 15                                       | 3UTR         |
| hsa-miR-11400 | NM_001001433 | STX16      | 1781  | 1797 | 1            | 1    | 0.49           | 0.03            | 16                        | 15                                       | 3UTR         |
| hsa-miR-11400 | NM_001134772 | STX16      | 1769  | 1785 | 1            | 1    | 0.49           | 0.03            | 16                        | 15                                       | 3UTR         |
| hsa-miR-11400 | NM_001134773 | STX16      | 1730  | 1746 | 1            | 1    | 0.00           | 0.00            | 16                        | 15                                       | 3UTR         |
| hsa-miR-11400 | NM_001204868 | STX16      | 1143  | 1159 | 1            | 1    | 0.95           | 1.26            | 16                        | 15                                       | 3UTR         |
| hsa-miR-11400 | NM_004603    | STX1A      | 1112  | 1132 | 1            | 1    | 1.26           | 0.25            | 20                        | 7                                        | 3UTR         |
| hsa-miR-11400 | NM_052874    | STX1B      | 3069  | 3102 | 1            | 1    | 0.00           | 0.13            | 22                        | 12                                       | 3UTR         |

| mirnaid       | refseqid     | genesymbol | start | end   | binding<br>p | seed | phylopste<br>m | phylopflan<br>k | binding_region_lengt<br>h | longest_<br>consecut<br>ive_pairi<br>ngs | positio<br>n |
|---------------|--------------|------------|-------|-------|--------------|------|----------------|-----------------|---------------------------|------------------------------------------|--------------|
| hsa-miR-11400 | NM_001244666 | STX5       | 1475  | 1491  | 0.961538     | 1    | 0.00           | 0.00            | 16                        | 15                                       | 3UTR         |
| hsa-miR-11400 | NM_139244    | STXBP5     | 6640  | 6690  | 1            | 1    | 1.54           | 0.78            | 28                        | 11                                       | 3UTR         |
| hsa-miR-11400 | NM_001127715 | STXBP5     | 6748  | 6798  | 1            | 1    | 1.54           | 0.78            | 28                        | 11                                       | 3UTR         |
| hsa-miR-11400 | NM_001304477 | STXBP6     | 2585  | 2603  | 1            | 1    | 0.23           | 0.99            | 18                        | 8                                        | 3UTR         |
| hsa-miR-11400 | XM_017021239 | STXBP6     | 2649  | 2667  | 1            | 1    | 0.00           | 0.00            | 18                        | 8                                        | 3UTR         |
| hsa-miR-11400 | XM_024451308 | SUGP2      | 5766  | 5789  | 0.961538     | 1    | 0.00           | 0.00            | 23                        | 13                                       | 3UTR         |
| hsa-miR-11400 | NM_001352071 | SUGP2      | 5179  | 5202  | 1            | 1    | 0.74           | 1.21            | 23                        | 13                                       | 3UTR         |
| hsa-miR-11400 | NM_001017392 | SUGP2      | 5177  | 5200  | 1            | 1    | 0.97           | 1.28            | 23                        | 13                                       | 3UTR         |
| hsa-miR-11400 | XM_006716442 | SULF1      | 2000  | 2026  | 1            | 1    | 0.00           | 0.00            | 26                        | 8                                        | 3UTR         |
| hsa-miR-11400 | NM_006753    | SURF6      | 3393  | 3413  | 1            | 1    | 2.17           | 2.98            | 20                        | 11                                       | 3UTR         |
| hsa-miR-11400 | XM_017022761 | SV2B       | 11089 | 11111 | 1            | 1    | 0.00           | 0.00            | 22                        | 15                                       | 3UTR         |
| hsa-miR-11400 | NM_033025    | SYDE1      | 2760  | 2800  | 1            | 1    | -0.14          | 0.19            | 40                        | 12                                       | 3UTR         |
| hsa-miR-11400 | NM_003177    | SYK        | 2800  | 2819  | 1            | 1    | -0.54          | -0.77           | 19                        | 9                                        | 3UTR         |
| hsa-miR-11400 | NM_001135052 | SYK        | 2731  | 2750  | 1            | 1    | 0.00           | 0.00            | 19                        | 9                                        | 3UTR         |
| hsa-miR-11400 | NM_001174167 | SYK        | 2885  | 2904  | 1            | 1    | -0.54          | -0.77           | 19                        | 9                                        | 3UTR         |
| hsa-miR-11400 | NM_001174168 | SYK        | 3062  | 3081  | 1            | 1    | -0.54          | -0.77           | 19                        | 9                                        | 3UTR         |
| hsa-miR-11400 | NM_003178    | SYN2       | 2821  | 2842  | 1            | 1    | -0.10          | 0.00            | 21                        | 7                                        | 3UTR         |

| mirnaid       | refseqid     | genesymbol | start | end  | binding<br>p | seed | phylopste<br>m | phylopflan<br>k | binding_region_lengt<br>h | longest_<br>consecut<br>ive_pairi<br>ngs | positio<br>n |
|---------------|--------------|------------|-------|------|--------------|------|----------------|-----------------|---------------------------|------------------------------------------|--------------|
| hsa-miR-11400 | NM_003490    | SYN3       | 6449  | 6472 | 1            | 1    | 4.09           | 3.70            | 23                        | 8                                        | 3UTR         |
| hsa-miR-11400 | XM_005267200 | SYNJ2      | 4798  | 4831 | 1            | 1    | 0.00           | 0.00            | 24                        | 14                                       | 3UTR         |
| hsa-miR-11400 | XM_006715592 | SYNJ2      | 6250  | 6283 | 1            | 1    | 0.00           | 0.00            | 24                        | 14                                       | 3UTR         |
| hsa-miR-11400 | NM_003898    | SYNJ2      | 6093  | 6126 | 1            | 1    | -0.40          | -0.17           | 24                        | 14                                       | 3UTR         |
| hsa-miR-11400 | NM_001178088 | SYNJ2      | 5978  | 6011 | 1            | 1    | -0.40          | -0.17           | 24                        | 14                                       | 3UTR         |
| hsa-miR-11400 | NM_018373    | SYNJ2BP    | 3180  | 3200 | 1            | 1    | 0.04           | 0.21            | 20                        | 13                                       | 3UTR         |
| hsa-miR-11400 | NM_018373    | SYNJ2BP    | 5252  | 5274 | 1            | 1    | -0.06          | 0.11            | 22                        | 7                                        | 3UTR         |
| hsa-miR-11400 | NM_144642    | SYNPR      | 1835  | 1860 | 1            | 1    | 0.83           | 0.43            | 25                        | 8                                        | 3UTR         |
| hsa-miR-11400 | NM_001130003 | SYNPR      | 1987  | 2012 | 1            | 1    | 0.83           | 0.43            | 25                        | 8                                        | 3UTR         |
| hsa-miR-11400 | NM_080550    | SYNRG      | 7128  | 7153 | 1            | 1    | 4.40           | 4.68            | 25                        | 8                                        | 3UTR         |
| hsa-miR-11400 | NM_198882    | SYNRG      | 7233  | 7258 | 1            | 1    | 4.53           | 4.81            | 25                        | 8                                        | 3UTR         |
| hsa-miR-11400 | NM_001163545 | SYNRG      | 7161  | 7186 | 1            | 1    | 4.51           | 4.93            | 25                        | 8                                        | 3UTR         |
| hsa-miR-11400 | NM_001163546 | SYNRG      | 6993  | 7018 | 1            | 1    | 4.40           | 4.68            | 25                        | 8                                        | 3UTR         |
| hsa-miR-11400 | NM_001163547 | SYNRG      | 6780  | 6805 | 1            | 1    | 4.53           | 4.81            | 25                        | 8                                        | 3UTR         |
| hsa-miR-11400 | NM_020826    | SYT13      | 4895  | 4913 | 1            | 1    | 0.57           | 1.85            | 18                        | 10                                       | 3UTR         |
| hsa-miR-11400 | NM_031912    | SYT15      | 3295  | 3318 | 1            | 1    | -0.18          | 0.02            | 23                        | 10                                       | 3UTR         |
| hsa-miR-11400 | XM_024448228 | SYT15      | 4200  | 4223 | 1            | 1    | 0.00           | 0.00            | 23                        | 10                                       | 3UTR         |

| mirnaid       | refseqid     | genesymbol | start | end  | binding<br>p | seed | phylopste<br>m | phylopflan<br>k | binding_region_lengt<br>h | longest_<br>consecut<br>ive_pairi<br>ngs | positio<br>n |
|---------------|--------------|------------|-------|------|--------------|------|----------------|-----------------|---------------------------|------------------------------------------|--------------|
| hsa-miR-11400 | NM_001367656 | SYT16      | 5314  | 5339 | 1            | 1    | 0.69           | 0.62            | 25                        | 12                                       | 3UTR         |
| hsa-miR-11400 | NM_001308157 | SYT17      | 1691  | 1711 | 1            | 1    | -0.09          | 2.27            | 20                        | 8                                        | 3UTR         |
| hsa-miR-11400 | NM_016524    | SYT17      | 1833  | 1853 | 1            | 1    | -0.09          | 2.27            | 20                        | 8                                        | 3UTR         |
| hsa-miR-11400 | NM_001253772 | SYT6       | 1744  | 1765 | 1            | 1    | -0.32          | 0.18            | 21                        | 13                                       | 3UTR         |
| hsa-miR-11400 | NM_205848    | SYT6       | 1624  | 1645 | 1            | 1    | 0.68           | 0.84            | 21                        | 13                                       | 3UTR         |
| hsa-miR-11400 | NM_001366223 | SYT6       | 1641  | 1662 | 1            | 1    | 1.25           | 0.60            | 21                        | 13                                       | 3UTR         |
| hsa-miR-11400 | NM_001366225 | SYT6       | 1723  | 1744 | 1            | 1    | -0.02          | 0.03            | 21                        | 13                                       | 3UTR         |
| hsa-miR-11400 | NM_175733    | SYT9       | 2654  | 2674 | 1            | 1    | 0.19           | 0.54            | 20                        | 8                                        | 3UTR         |
| hsa-miR-11400 | XM_011519906 | SYT9       | 2240  | 2259 | 1            | 1    | 0.00           | 0.00            | 19                        | 8                                        | 3UTR         |
| hsa-miR-11400 | NM_006283    | TACC1      | 4859  | 4878 | 1            | 1    | 0.32           | -0.04           | 19                        | 9                                        | 3UTR         |
| hsa-miR-11400 | NM_001352786 | TACC1      | 5054  | 5073 | 1            | 1    | 0.32           | -0.04           | 19                        | 9                                        | 3UTR         |
| hsa-miR-11400 | NM_001352792 | TACC1      | 4438  | 4457 | 1            | 1    | 0.32           | -0.04           | 19                        | 9                                        | 3UTR         |
| hsa-miR-11400 | NM_001352798 | TACC1      | 4405  | 4424 | 1            | 1    | 0.32           | -0.04           | 19                        | 9                                        | 3UTR         |
| hsa-miR-11400 | NM_001352799 | TACC1      | 4351  | 4370 | 1            | 1    | 0.32           | -0.04           | 19                        | 9                                        | 3UTR         |
| hsa-miR-11400 | NM_001122824 | TACC1      | 3629  | 3648 | 1            | 1    | 0.32           | -0.04           | 19                        | 9                                        | 3UTR         |
| hsa-miR-11400 | NM_001146216 | TACC1      | 4441  | 4460 | 1            | 1    | 0.32           | -0.04           | 19                        | 9                                        | 3UTR         |
| hsa-miR-11400 | NM_139353    | TAF1C      | 3226  | 3246 | 1            | 1    | 2.03           | 0.89            | 20                        | 15                                       | 3UTR         |

| mirnaid       | refseqid     | genesymbol | start | end  | binding<br>p | seed | phylopste<br>m | phylopflan<br>k | binding_region_lengt<br>h | longest_<br>consecut<br>ive_pairi<br>ngs | positio<br>n |
|---------------|--------------|------------|-------|------|--------------|------|----------------|-----------------|---------------------------|------------------------------------------|--------------|
| hsa-miR-11400 | NM_005679    | TAF1C      | 3468  | 3488 | 1            | 1    | 0.72           | 0.66            | 20                        | 15                                       | 3UTR         |
| hsa-miR-11400 | NM_001243156 | TAF1C      | 3390  | 3410 | 1            | 1    | 0.72           | 0.66            | 20                        | 15                                       | 3UTR         |
| hsa-miR-11400 | NM_001243157 | TAF1C      | 3024  | 3044 | 1            | 1    | 0.00           | 0.00            | 20                        | 15                                       | 3UTR         |
| hsa-miR-11400 | NM_001243158 | TAF1C      | 2885  | 2905 | 1            | 1    | 1.23           | 0.55            | 20                        | 15                                       | 3UTR         |
| hsa-miR-11400 | NM_001243159 | TAF1C      | 3357  | 3377 | 1            | 1    | 2.03           | 0.89            | 20                        | 15                                       | 3UTR         |
| hsa-miR-11400 | XM_005273099 | TAF5L      | 2311  | 2333 | 1            | 1    | 0.00           | 0.00            | 22                        | 9                                        | 3UTR         |
| hsa-miR-11400 | NM_025185    | TANC2      | 7836  | 7854 | 0.980769     | 1    | -0.31          | 0.10            | 18                        | 11                                       | 3UTR         |
| hsa-miR-11400 | XM_006721811 | TANC2      | 5514  | 5533 | 1            | 1    | 0.00           | 0.00            | 19                        | 8                                        | 3UTR         |
| hsa-miR-11400 | NM_153365    | TAPT1      | 4050  | 4071 | 1            | 1    | 4.15           | 4.56            | 21                        | 11                                       | 3UTR         |
| hsa-miR-11400 | NM_001271845 | TBC1D16    | 3331  | 3352 | 1            | 1    | -0.38          | -0.01           | 21                        | 10                                       | 3UTR         |
| hsa-miR-11400 | NM_001292054 | TBC1D19    | 2339  | 2355 | 1            | 1    | 0.65           | 0.29            | 16                        | 13                                       | 3UTR         |
| hsa-miR-11400 | NM_018317    | TBC1D19    | 2534  | 2550 | 1            | 1    | 0.71           | 0.13            | 16                        | 13                                       | 3UTR         |
| hsa-miR-11400 | NM_178571    | TBC1D26    | 1125  | 1147 | 1            | 1    | 0.32           | 0.57            | 22                        | 6                                        | 3UTR         |
| hsa-miR-11400 | XM_017020882 | TBC1D4     | 3354  | 3372 | 1            | 1    | 0.00           | 0.00            | 18                        | 8                                        | 3UTR         |
| hsa-miR-11400 | NM_001349077 | TBC1D5     | 4006  | 4030 | 1            | 1    | 1.13           | 1.68            | 24                        | 9                                        | 3UTR         |
| hsa-miR-11400 | NM_001134381 | TBC1D5     | 2739  | 2755 | 1            | 1    | -0.02          | 0.02            | 16                        | 15                                       | 3UTR         |
| hsa-miR-11400 | NM_198868    | TBC1D9B    | 5022  | 5041 | 0.974359     | 1    | 0.00           | 0.00            | 19                        | 15                                       | 3UTR         |

| mirnaid       | refseqid     | genesymbol | start | end  | binding<br>p | seed | phylopste<br>m | phylopflan<br>k | binding_region_lengt<br>h | longest_<br>consecut<br>ive_pairi<br>ngs | positio<br>n |
|---------------|--------------|------------|-------|------|--------------|------|----------------|-----------------|---------------------------|------------------------------------------|--------------|
| hsa-miR-11400 | NM_152715    | TBCEL      | 4689  | 4714 | 0.980769     | 1    | -0.57          | 0.12            | 20                        | 13                                       | 3UTR         |
| hsa-miR-11400 | NM_001130047 | TBCEL      | 4534  | 4577 | 1            | 1    | -0.31          | -0.02           | 20                        | 13                                       | 3UTR         |
| hsa-miR-11400 | NM_199047    | TBPL2      | 1181  | 1198 | 1            | 1    | 0.53           | 0.42            | 17                        | 8                                        | 3UTR         |
| hsa-miR-11400 | NM_001080508 | TBX18      | 2439  | 2458 | 1            | 1    | 0.72           | 0.26            | 19                        | 8                                        | 3UTR         |
| hsa-miR-11400 | NM_001282913 | TCAIM      | 2351  | 2373 | 1            | 1    | 0.02           | -0.14           | 22                        | 7                                        | 3UTR         |
| hsa-miR-11400 | NM_001282913 | TCAIM      | 2902  | 2913 | 1            | 1    | -0.29          | -0.81           | 11                        | 10                                       | 3UTR         |
| hsa-miR-11400 | NM_173826    | TCAIM      | 2229  | 2251 | 1            | 1    | 0.02           | -0.14           | 22                        | 7                                        | 3UTR         |
| hsa-miR-11400 | NM_173826    | TCAIM      | 2741  | 2791 | 1            | 1    | -0.52          | -0.51           | 12                        | 10                                       | 3UTR         |
| hsa-miR-11400 | NM_153035    | TCEANC2    | 4726  | 4744 | 1            | 1    | 0.43           | 0.24            | 18                        | 11                                       | 3UTR         |
| hsa-miR-11400 | XM_005256298 | TCF25      | 2230  | 2253 | 1            | 1    | 0.00           | 0.00            | 23                        | 10                                       | 3UTR         |
| hsa-miR-11400 | XM_017023054 | TCF25      | 2373  | 2396 | 1            | 1    | 0.00           | 0.00            | 23                        | 10                                       | 3UTR         |
| hsa-miR-11400 | XM_005266752 | TCF4       | 2690  | 2710 | 1            | 1    | 0.00           | 0.00            | 20                        | 8                                        | 3UTR         |
| hsa-miR-11400 | XM_017025956 | TCF4       | 2101  | 2121 | 1            | 1    | 0.00           | 0.00            | 20                        | 8                                        | 3UTR         |
| hsa-miR-11400 | NM_001243227 | TCF4       | 2722  | 2742 | 1            | 1    | -0.39          | 0.94            | 20                        | 8                                        | 3UTR         |
| hsa-miR-11400 | NM_001243230 | TCF4       | 2340  | 2360 | 1            | 1    | 0.00           | 0.00            | 20                        | 8                                        | 3UTR         |
| hsa-miR-11400 | NM_001243233 | TCF4       | 2081  | 2101 | 1            | 1    | 0.00           | 0.00            | 20                        | 8                                        | 3UTR         |
| hsa-miR-11400 | NM_001243236 | TCF4       | 1963  | 1983 | 1            | 1    | 0.00           | 0.00            | 20                        | 8                                        | 3UTR         |

| mirnaid       | refseqid    | genesymbol | start | end  | binding<br>p | seed | phylopste<br>m | phylopflan<br>k | binding_region_lengt<br>h | longest_<br>consecut<br>ive_pairi<br>ngs | positio<br>n |
|---------------|-------------|------------|-------|------|--------------|------|----------------|-----------------|---------------------------|------------------------------------------|--------------|
| hsa-miR-11400 | NM_021966   | TCL1A      | 781   | 802  | 1            | 1    | 0.08           | -0.29           | 16                        | 14                                       | 3UTR         |
| hsa-miR-11400 | NM_00109872 | TCL1A      | 776   | 797  | 1            | 1    | -0.26          | -0.37           | 16                        | 14                                       | 3UTR         |
| hsa-miR-11400 | XM_01152020 | TCP11L1    | 5914  | 5936 | 1            | 1    | 0.00           | 0.00            | 22                        | 9                                        | 3UTR         |
| hsa-miR-11400 | NM_00136815 | TCP11X1    | 1669  | 1690 | 1            | 1    | -0.07          | 0.37            | 21                        | 14                                       | 3UTR         |
| hsa-miR-11400 | NM_00127742 | TCP11X2    | 1669  | 1690 | 1            | 1    | 0.00           | 0.00            | 21                        | 14                                       | 3UTR         |
| hsa-miR-11400 | NM_153046   | TDRD9      | 4729  | 4749 | 1            | 1    | 0.10           | 0.53            | 18                        | 9                                        | 3UTR         |
| hsa-miR-11400 | NM_015395   | TECPR1     | 4916  | 4939 | 1            | 1    | 0.19           | 0.10            | 17                        | 15                                       | 3UTR         |
| hsa-miR-11400 | NM_053285   | TEKT1      | 2806  | 2834 | 1            | 1    | 2.46           | 2.91            | 28                        | 10                                       | 3UTR         |
| hsa-miR-11400 | NM_00108042 | TENM2      | 7809  | 7835 | 1            | 1    | 3.01           | 2.97            | 26                        | 8                                        | 3UTR         |
| hsa-miR-11400 | XM_02445434 | TENT4A     | 3328  | 3348 | 1            | 1    | 0.00           | 0.00            | 20                        | 11                                       | 3UTR         |
| hsa-miR-11400 | NM_017633   | TENT5A     | 3865  | 3883 | 1            | 1    | 0.87           | 0.96            | 18                        | 6                                        | 3UTR         |
| hsa-miR-11400 | NM_004923   | TESMIN     | 1823  | 1862 | 1            | 1    | 1.15           | 0.77            | 16                        | 14                                       | 3UTR         |
| hsa-miR-11400 | NM_00103965 | TESMIN     | 2842  | 2859 | 1            | 1    | 2.49           | 1.31            | 17                        | 8                                        | 3UTR         |
| hsa-miR-11400 | NM_017628   | TET2       | 6630  | 6661 | 1            | 1    | 0.23           | 0.05            | 31                        | 10                                       | 3UTR         |
| hsa-miR-11400 | NM_00128873 | TEX2       | 3875  | 3897 | 1            | 1    | 4.52           | 3.31            | 22                        | 10                                       | 3UTR         |
| hsa-miR-11400 | XM_01152499 | TEX2       | 3948  | 3970 | 1            | 1    | 0.00           | 0.00            | 22                        | 10                                       | 3UTR         |
| hsa-miR-11400 | NM_018469   | TEX2       | 3896  | 3918 | 1            | 1    | 4.52           | 3.31            | 22                        | 10                                       | 3UTR         |



| mirnaid       | refseqid     | genesymbol | start | end  | binding<br>p | seed | phylopste<br>m | phylopflan<br>k | binding_region_lengt<br>h | longest_<br>consecut<br>ive_pairi<br>ngs | positio<br>n |
|---------------|--------------|------------|-------|------|--------------|------|----------------|-----------------|---------------------------|------------------------------------------|--------------|
| hsa-miR-11400 | NM_144582    | TEX261     | 1341  | 1363 | 1            | 1    | 0.63           | 0.23            | 22                        | 9                                        | 3UTR         |
| hsa-miR-11400 | NM_001351123 | TEX49      | 534   | 560  | 1            | 1    | 0.01           | 0.30            | 21                        | 7                                        | 3UTR         |
| hsa-miR-11400 | NM_014553    | TFCP2L1    | 6461  | 6482 | 1            | 1    | -0.34          | -0.10           | 21                        | 8                                        | 3UTR         |
| hsa-miR-11400 | NM_006521    | TFE3       | 2125  | 2139 | 1            | 1    | 3.30           | 3.93            | 14                        | 13                                       | 3UTR         |
| hsa-miR-11400 | NM_012252    | TFEC       | 3679  | 3699 | 1            | 1    | -0.27          | -0.20           | 20                        | 10                                       | 3UTR         |
| hsa-miR-11400 | NM_001018058 | TFEC       | 3592  | 3612 | 1            | 1    | 0.03           | -0.03           | 20                        | 10                                       | 3UTR         |
| hsa-miR-11400 | NM_001008697 | TFIP11     | 3302  | 3321 | 1            | 1    | 0.37           | 1.87            | 19                        | 15                                       | 3UTR         |
| hsa-miR-11400 | NM_006287    | TFPI       | 2677  | 2721 | 1            | 1    | -0.14          | 0.26            | 19                        | 17                                       | 3UTR         |
| hsa-miR-11400 | NM_001329240 | TFPI       | 2708  | 2752 | 1            | 1    | 0.41           | 0.38            | 19                        | 17                                       | 3UTR         |
| hsa-miR-11400 | NM_000660    | TGFB1      | 2317  | 2337 | 1            | 1    | 0.71           | 0.40            | 20                        | 16                                       | 3UTR         |
| hsa-miR-11400 | NM_000660    | TGFB1      | 2611  | 2660 | 1            | 1    | 0.55           | 0.62            | 49                        | 9                                        | 3UTR         |
| hsa-miR-11400 | NM_001199515 | TGIF2      | 3284  | 3300 | 0.974359     | 1    | 3.43           | 1.70            | 16                        | 9                                        | 3UTR         |
| hsa-miR-11400 | NM_001368096 | TGOLN2     | 1547  | 1570 | 1            | 1    | -0.02          | 0.04            | 23                        | 9                                        | 3UTR         |
| hsa-miR-11400 | NM_001206844 | TGOLN2     | 1356  | 1379 | 1            | 1    | 0.36           | 0.88            | 23                        | 9                                        | 3UTR         |
| hsa-miR-11400 | NM_020147    | THAP10     | 1340  | 1364 | 1            | 1    | 1.00           | 0.59            | 17                        | 10                                       | 3UTR         |
| hsa-miR-11400 | XM_005262774 | THAP6      | 1794  | 1817 | 1            | 1    | 0.00           | 0.00            | 23                        | 13                                       | 3UTR         |
| hsa-miR-11400 | NM_001289997 | THPO       | 1347  | 1366 | 1            | 1    | 1.56           | 2.17            | 19                        | 12                                       | 3UTR         |

| mirnaid       | refseqid     | genesymbol | start | end   | binding<br>p | seed | phylopste<br>m | phylopflan<br>k | binding_region_lengt<br>h | longest_<br>consecut<br>ive_pairi<br>ngs | positio<br>n |
|---------------|--------------|------------|-------|-------|--------------|------|----------------|-----------------|---------------------------|------------------------------------------|--------------|
| hsa-miR-11400 | NM_000460    | THPO       | 1462  | 1481  | 1            | 1    | 1.75           | 2.24            | 19                        | 12                                       | 3UTR         |
| hsa-miR-11400 | NM_001177597 | THPO       | 1451  | 1470  | 1            | 1    | 1.56           | 2.17            | 19                        | 12                                       | 3UTR         |
| hsa-miR-11400 | NM_001177598 | THPO       | 1446  | 1465  | 1            | 1    | 1.56           | 2.17            | 19                        | 12                                       | 3UTR         |
| hsa-miR-11400 | NM_001252634 | THRB       | 5246  | 5262  | 1            | 1    | 0.02           | 0.22            | 16                        | 15                                       | 3UTR         |
| hsa-miR-11400 | NM_001354712 | THRB       | 5157  | 5173  | 1            | 1    | 0.20           | 0.34            | 16                        | 15                                       | 3UTR         |
| hsa-miR-11400 | NM_001374822 | THRB       | 4947  | 4963  | 1            | 1    | 0.19           | 0.38            | 16                        | 15                                       | 3UTR         |
| hsa-miR-11400 | NM_001374823 | THRB       | 5079  | 5095  | 1            | 1    | 0.21           | 0.05            | 16                        | 15                                       | 3UTR         |
| hsa-miR-11400 | NM_001374824 | THRB       | 5252  | 5268  | 1            | 1    | -0.22          | 0.22            | 16                        | 15                                       | 3UTR         |
| hsa-miR-11400 | NM_001374825 | THRB       | 4959  | 4975  | 1            | 1    | 0.43           | 0.50            | 16                        | 15                                       | 3UTR         |
| hsa-miR-11400 | NM_000461    | THRB       | 5011  | 5027  | 1            | 1    | 0.21           | 0.17            | 16                        | 15                                       | 3UTR         |
| hsa-miR-11400 | NM_001128176 | THRB       | 5122  | 5138  | 1            | 1    | 0.25           | 0.21            | 16                        | 15                                       | 3UTR         |
| hsa-miR-11400 | NM_001316349 | THSD7B     | 5333  | 5358  | 1            | 1    | 2.39           | 1.47            | 25                        | 8                                        | 3UTR         |
| hsa-miR-11400 | NM_001099221 | TIFAB      | 2044  | 2062  | 1            | 1    | 0.64           | -0.22           | 18                        | 11                                       | 3UTR         |
| hsa-miR-11400 | NM_030953    | TIGD6      | 3099  | 3117  | 1            | 1    | 1.28           | 0.58            | 18                        | 8                                        | 3UTR         |
| hsa-miR-11400 | NM_173799    | TIGIT      | 1687  | 1706  | 1            | 1    | -0.51          | -0.14           | 19                        | 9                                        | 3UTR         |
| hsa-miR-11400 | XM_024453388 | TIGIT      | 11508 | 11528 | 1            | 1    | 0.00           | 0.00            | 20                        | 7                                        | 3UTR         |
| hsa-miR-11400 | NM_004085    | TIMM8A     | 1113  | 1139  | 1            | 1    | 1.14           | 2.13            | 16                        | 14                                       | 3UTR         |

| mirnaid       | refseqid     | genesymbol | start | end   | binding<br>p | seed | phylopste<br>m | phylopflan<br>k | binding_region_lengt<br>h | longest_<br>consecut<br>ive_pairi<br>ngs | positio<br>n |
|---------------|--------------|------------|-------|-------|--------------|------|----------------|-----------------|---------------------------|------------------------------------------|--------------|
| hsa-miR-11400 | NM_001145951 | TIMM8A     | 2854  | 2880  | 1            | 1    | 1.14           | 2.13            | 16                        | 14                                       | 3UTR         |
| hsa-miR-11400 | NM_152902    | TIPRL      | 1222  | 1238  | 1            | 1    | -0.19          | 0.22            | 16                        | 10                                       | 3UTR         |
| hsa-miR-11400 | NM_001258028 | TKT        | 2524  | 2545  | 1            | 1    | 0.00           | 0.00            | 21                        | 7                                        | 3UTR         |
| hsa-miR-11400 | NM_001135055 | TKT        | 2359  | 2380  | 1            | 1    | 0.00           | 0.00            | 21                        | 7                                        | 3UTR         |
| hsa-miR-11400 | XM_006721671 | TLCD1      | 897   | 924   | 1            | 1    | 0.00           | 0.00            | 17                        | 15                                       | 3UTR         |
| hsa-miR-11400 | NM_152487    | TLCD4      | 1423  | 1448  | 1            | 1    | 0.16           | 0.08            | 25                        | 8                                        | 3UTR         |
| hsa-miR-11400 | NM_001130    | TLE5       | 938   | 980   | 1            | 1    | 3.61           | 2.58            | 42                        | 10                                       | 3UTR         |
| hsa-miR-11400 | NM_138554    | TLR4       | 3734  | 3756  | 1            | 1    | -0.23          | -0.20           | 22                        | 6                                        | 3UTR         |
| hsa-miR-11400 | NM_138554    | TLR4       | 11834 | 11855 | 1            | 1    | 0.46           | 0.97            | 21                        | 13                                       | 3UTR         |
| hsa-miR-11400 | NM_003266    | TLR4       | 3854  | 3876  | 1            | 1    | -0.23          | -0.20           | 22                        | 6                                        | 3UTR         |
| hsa-miR-11400 | NM_003266    | TLR4       | 11954 | 11975 | 1            | 1    | 0.46           | 0.97            | 21                        | 13                                       | 3UTR         |
| hsa-miR-11400 | NM_006068    | TLR6       | 3900  | 3922  | 1            | 1    | 3.09           | 1.14            | 22                        | 9                                        | 3UTR         |
| hsa-miR-11400 | NM_006068    | TLR6       | 3586  | 3610  | 1            | 1    | 2.39           | 3.58            | 24                        | 10                                       | 3UTR         |
| hsa-miR-11400 | NM_138636    | TLR8       | 3834  | 3855  | 1            | 1    | 0.00           | 0.00            | 21                        | 11                                       | 3UTR         |
| hsa-miR-11400 | NM_138786    | TM4SF18    | 3132  | 3153  | 1            | 1    | 2.76           | 2.48            | 21                        | 11                                       | 3UTR         |
| hsa-miR-11400 | NM_001184723 | TM4SF18    | 3047  | 3068  | 1            | 1    | 1.74           | 2.47            | 21                        | 11                                       | 3UTR         |
| hsa-miR-11400 | XM_011539977 | TM9SF3     | 6032  | 6068  | 1            | 1    | 0.00           | 0.00            | 22                        | 8                                        | 3UTR         |

| mirnaid       | refseqid     | genesymbol | start | end  | binding<br>p | seed | phylopste<br>m | phylopflan<br>k | binding_region_lengt<br>h | longest_<br>consecut<br>ive_pairi<br>ngs | positio<br>n |
|---------------|--------------|------------|-------|------|--------------|------|----------------|-----------------|---------------------------|------------------------------------------|--------------|
| hsa-miR-11400 | NM_020123    | TM9SF3     | 5863  | 5899 | 1            | 1    | 0.68           | 1.30            | 22                        | 8                                        | 3UTR         |
| hsa-miR-11400 | NM_001330376 | TMED3      | 1533  | 1553 | 1            | 1    | 0.17           | 0.13            | 20                        | 9                                        | 3UTR         |
| hsa-miR-11400 | NM_024056    | TMEM106C   | 855   | 868  | 1            | 1    | 0.94           | 1.51            | 13                        | 12                                       | 3UTR         |
| hsa-miR-11400 | NM_183065    | TMEM107    | 1650  | 1668 | 1            | 1    | -0.08          | -0.02           | 18                        | 9                                        | 3UTR         |
| hsa-miR-11400 | NM_001351278 | TMEM107    | 1647  | 1665 | 1            | 1    | -0.11          | 0.00            | 18                        | 9                                        | 3UTR         |
| hsa-miR-11400 | NM_152913    | TMEM130    | 2042  | 2071 | 1            | 1    | 1.11           | 1.76            | 29                        | 9                                        | 3UTR         |
| hsa-miR-11400 | NM_001134450 | TMEM130    | 2078  | 2107 | 1            | 1    | 1.11           | 1.76            | 29                        | 9                                        | 3UTR         |
| hsa-miR-11400 | NM_001134451 | TMEM130    | 1736  | 1765 | 1            | 1    | 1.31           | 1.73            | 29                        | 9                                        | 3UTR         |
| hsa-miR-11400 | NM_001286219 | TMEM132B   | 8206  | 8225 | 0.961538     | 1    | 0.07           | -0.26           | 19                        | 7                                        | 3UTR         |
| hsa-miR-11400 | NM_052907    | TMEM132B   | 9459  | 9478 | 0.961538     | 1    | 0.07           | -0.26           | 19                        | 7                                        | 3UTR         |
| hsa-miR-11400 | NM_025124    | TMEM134    | 1192  | 1213 | 1            | 1    | 0.18           | 0.14            | 21                        | 11                                       | 3UTR         |
| hsa-miR-11400 | NM_001078650 | TMEM134    | 1147  | 1168 | 1            | 1    | 0.14           | 0.01            | 21                        | 11                                       | 3UTR         |
| hsa-miR-11400 | NM_022918    | TMEM135    | 7670  | 7691 | 1            | 1    | -0.36          | 0.04            | 21                        | 12                                       | 3UTR         |
| hsa-miR-11400 | NM_001168724 | TMEM135    | 7604  | 7625 | 1            | 1    | -0.36          | 0.04            | 21                        | 12                                       | 3UTR         |
| hsa-miR-11400 | XM_011531716 | TMEM154    | 1033  | 1056 | 1            | 1    | 0.00           | 0.00            | 17                        | 15                                       | 3UTR         |
| hsa-miR-11400 | NM_024943    | TMEM156    | 1092  | 1134 | 1            | 1    | 0.41           | 1.07            | 21                        | 15                                       | 3UTR         |
| hsa-miR-11400 | XM_005262205 | TMEM164    | 4833  | 4849 | 1            | 1    | 0.00           | 0.00            | 16                        | 10                                       | 3UTR         |

| mirnaid       | refseqid     | genesymbol | start | end  | binding<br>p | seed | phylopste<br>m | phylopflan<br>k | binding_region_lengt<br>h | longest_<br>consecut<br>ive_pairi<br>ngs | positio<br>n |
|---------------|--------------|------------|-------|------|--------------|------|----------------|-----------------|---------------------------|------------------------------------------|--------------|
| hsa-miR-11400 | NM_022484    | TMEM168    | 5061  | 5086 | 1            | 1    | 3.79           | 4.03            | 25                        | 8                                        | 3UTR         |
| hsa-miR-11400 | NM_020823    | TMEM181    | 4875  | 4896 | 1            | 1    | -0.04          | 0.32            | 21                        | 10                                       | 3UTR         |
| hsa-miR-11400 | NM_138391    | TMEM183A   | 2891  | 2917 | 1            | 1    | 0.79           | 0.11            | 18                        | 8                                        | 3UTR         |
| hsa-miR-11400 | NM_018279    | TMEM19     | 3988  | 4008 | 1            | 1    | -0.11          | -0.15           | 20                        | 7                                        | 3UTR         |
| hsa-miR-11400 | NM_001100389 | TMEM192    | 3668  | 3693 | 1            | 1    | 0.26           | 0.18            | 25                        | 8                                        | 3UTR         |
| hsa-miR-11400 | NM_001363562 | TMEM196    | 1463  | 1495 | 1            | 1    | -0.02          | 0.19            | 23                        | 9                                        | 3UTR         |
| hsa-miR-11400 | NM_001318217 | TMEM208    | 741   | 788  | 1            | 1    | 0.40           | 2.58            | 16                        | 14                                       | 3UTR         |
| hsa-miR-11400 | NM_014187    | TMEM208    | 624   | 671  | 1            | 1    | 0.40           | 2.58            | 16                        | 14                                       | 3UTR         |
| hsa-miR-11400 | XM_017001812 | TMEM234    | 2436  | 2457 | 1            | 1    | 0.00           | 0.00            | 21                        | 13                                       | 3UTR         |
| hsa-miR-11400 | XM_024448414 | TMEM234    | 2312  | 2333 | 1            | 1    | 0.00           | 0.00            | 21                        | 13                                       | 3UTR         |
| hsa-miR-11400 | NM_032933    | TMEM241    | 2812  | 2832 | 1            | 1    | 2.25           | 2.76            | 20                        | 7                                        | 3UTR         |
| hsa-miR-11400 | NM_032933    | TMEM241    | 2610  | 2633 | 1            | 1    | 2.66           | 2.47            | 23                        | 8                                        | 3UTR         |
| hsa-miR-11400 | XM_024448724 | TMEM25     | 1821  | 1858 | 1            | 1    | 0.00           | 0.00            | 20                        | 10                                       | 3UTR         |
| hsa-miR-11400 | NM_001270367 | TMEM254    | 1088  | 1103 | 1            | 1    | -0.10          | -0.32           | 15                        | 8                                        | 3UTR         |
| hsa-miR-11400 | NM_017938    | TMEM255A   | 1885  | 1903 | 1            | 1    | 0.75           | 0.54            | 18                        | 9                                        | 3UTR         |
| hsa-miR-11400 | NM_001104544 | TMEM255A   | 1813  | 1831 | 1            | 1    | 0.70           | 0.74            | 18                        | 9                                        | 3UTR         |
| hsa-miR-11400 | NM_001104545 | TMEM255A   | 1561  | 1579 | 1            | 1    | 0.34           | 1.10            | 18                        | 9                                        | 3UTR         |

| mirnaid       | refseqid     | genesymbol | start | end  | binding<br>p | seed | phylopste<br>m | phylopflan<br>k | binding_region_lengt<br>h | longest_<br>consecut<br>ive_pairi<br>ngs | positio<br>n |
|---------------|--------------|------------|-------|------|--------------|------|----------------|-----------------|---------------------------|------------------------------------------|--------------|
| hsa-miR-11400 | NM_001351003 | TMEM272    | 1412  | 1435 | 1            | 1    | -0.20          | -0.15           | 18                        | 10                                       | 3UTR         |
| hsa-miR-11400 | NM_001288743 | TMEM273    | 822   | 870  | 0.974359     | 1    | -0.10          | -0.12           | 19                        | 13                                       | 3UTR         |
| hsa-miR-11400 | XM_005248116 | TMEM33     | 1630  | 1665 | 1            | 1    | 0.00           | 0.00            | 19                        | 8                                        | 3UTR         |
| hsa-miR-11400 | XM_005248117 | TMEM33     | 1590  | 1608 | 1            | 1    | 0.00           | 0.00            | 18                        | 8                                        | 3UTR         |
| hsa-miR-11400 | XM_011510659 | TMEM37     | 947   | 986  | 1            | 1    | 0.00           | 0.00            | 39                        | 10                                       | 3UTR         |
| hsa-miR-11400 | NM_001331211 | TMEM45B    | 947   | 984  | 1            | 1    | 1.03           | 0.62            | 37                        | 11                                       | 3UTR         |
| hsa-miR-11400 | NM_153022    | TMEM52B    | 1593  | 1611 | 1            | 1    | 0.01           | -0.10           | 18                        | 12                                       | 3UTR         |
| hsa-miR-11400 | NM_001079815 | TMEM52B    | 1527  | 1545 | 1            | 1    | 0.01           | -0.10           | 18                        | 12                                       | 3UTR         |
| hsa-miR-11400 | NM_001286660 | TMEM68     | 2026  | 2044 | 1            | 1    | 2.16           | 2.34            | 18                        | 7                                        | 3UTR         |
| hsa-miR-11400 | NM_001345926 | TMEM72     | 1733  | 1752 | 1            | 1    | -0.20          | -0.45           | 19                        | 8                                        | 3UTR         |
| hsa-miR-11400 | NM_001123376 | TMEM72     | 1800  | 1819 | 1            | 1    | -0.63          | -0.56           | 19                        | 8                                        | 3UTR         |
| hsa-miR-11400 | NM_015497    | TMEM87A    | 2420  | 2459 | 0.961538     | 1    | 1.81           | 2.66            | 24                        | 8                                        | 3UTR         |
| hsa-miR-11400 | NM_001286487 | TMEM87A    | 2510  | 2549 | 1            | 1    | 3.01           | 1.94            | 24                        | 8                                        | 3UTR         |
| hsa-miR-11400 | NM_001110503 | TMEM87A    | 1619  | 1635 | 1            | 1    | -0.02          | -0.02           | 16                        | 12                                       | 3UTR         |
| hsa-miR-11400 | NM_032824    | TMEM87B    | 3096  | 3115 | 1            | 1    | 1.19           | 0.22            | 19                        | 7                                        | 3UTR         |
| hsa-miR-11400 | NM_001329914 | TMEM87B    | 3096  | 3115 | 1            | 1    | 1.19           | 0.22            | 19                        | 7                                        | 3UTR         |
| hsa-miR-11400 | NM_001301746 | TMEM98     | 2568  | 2586 | 1            | 1    | 0.00           | 0.00            | 18                        | 9                                        | 3UTR         |

| mirnaid       | refseqid     | genesymbol | start | end  | binding<br>p | seed | phylopste<br>m | phylopflan<br>k | binding_region_lengt<br>h | longest_<br>consecut<br>ive_pairi<br>ngs | positio<br>n |
|---------------|--------------|------------|-------|------|--------------|------|----------------|-----------------|---------------------------|------------------------------------------|--------------|
| hsa-miR-11400 | NM_001033504 | TMEM98     | 2420  | 2438 | 1            | 1    | 0.00           | 0.00            | 18                        | 9                                        | 3UTR         |
| hsa-miR-11400 | NM_182606    | TMPRSS11A  | 2792  | 2807 | 1            | 1    | 0.56           | 1.17            | 15                        | 14                                       | 3UTR         |
| hsa-miR-11400 | NM_001114387 | TMPRSS11A  | 2783  | 2798 | 1            | 1    | 0.54           | 0.99            | 15                        | 14                                       | 3UTR         |
| hsa-miR-11400 | NM_001290096 | TMPRSS4    | 1683  | 1707 | 1            | 1    | 0.26           | -0.01           | 19                        | 8                                        | 3UTR         |
| hsa-miR-11400 | NM_019894    | TMPRSS4    | 1768  | 1792 | 1            | 1    | 0.04           | 0.03            | 19                        | 8                                        | 3UTR         |
| hsa-miR-11400 | NM_001083947 | TMPRSS4    | 1753  | 1777 | 1            | 1    | 0.26           | -0.01           | 19                        | 8                                        | 3UTR         |
| hsa-miR-11400 | NM_001173551 | TMPRSS4    | 1762  | 1786 | 1            | 1    | 0.26           | -0.01           | 19                        | 8                                        | 3UTR         |
| hsa-miR-11400 | NM_001173552 | TMPRSS4    | 1648  | 1672 | 1            | 1    | 0.26           | -0.01           | 19                        | 8                                        | 3UTR         |
| hsa-miR-11400 | NM_152588    | TMTC2      | 5256  | 5275 | 1            | 1    | 1.74           | 1.00            | 19                        | 14                                       | 3UTR         |
| hsa-miR-11400 | NM_177441    | TMUB2      | 1687  | 1712 | 1            | 1    | 0.44           | 0.63            | 25                        | 10                                       | 3UTR         |
| hsa-miR-11400 | NM_024107    | TMUB2      | 2051  | 2071 | 1            | 1    | 3.47           | 2.43            | 20                        | 8                                        | 3UTR         |
| hsa-miR-11400 | NM_001330235 | TMUB2      | 1344  | 1369 | 1            | 1    | 0.44           | 0.63            | 25                        | 10                                       | 3UTR         |
| hsa-miR-11400 | NM_001353177 | TMUB2      | 1324  | 1349 | 1            | 1    | 0.44           | 0.63            | 25                        | 10                                       | 3UTR         |
| hsa-miR-11400 | NM_001353182 | TMUB2      | 1257  | 1282 | 1            | 1    | 0.44           | 0.63            | 25                        | 10                                       | 3UTR         |
| hsa-miR-11400 | NM_001076674 | TMUB2      | 1265  | 1290 | 1            | 1    | 0.44           | 0.63            | 25                        | 10                                       | 3UTR         |
| hsa-miR-11400 | NM_000594    | TNF        | 1281  | 1298 | 1            | 1    | -0.27          | 0.26            | 17                        | 9                                        | 3UTR         |
| hsa-miR-11400 | XM_011537114 | TNFAIP2    | 2874  | 2901 | 1            | 1    | 0.00           | 0.00            | 27                        | 11                                       | 3UTR         |

| mirnaid       | refseqid     | genesymbol | start | end  | binding<br>p | seed | phylopste<br>m | phylopflan<br>k | binding_region_lengt<br>h | longest_<br>consecut<br>ive_pairi<br>ngs | positio<br>n |
|---------------|--------------|------------|-------|------|--------------|------|----------------|-----------------|---------------------------|------------------------------------------|--------------|
| hsa-miR-11400 | NM_024575    | TNFAIP8L2  | 956   | 1003 | 1            | 1    | 1.72           | 0.45            | 14                        | 12                                       | 3UTR         |
| hsa-miR-11400 | NM_003840    | TNFRSF10D  | 2262  | 2303 | 1            | 1    | 0.00           | -0.24           | 17                        | 15                                       | 3UTR         |
| hsa-miR-11400 | NM_001039664 | TNFRSF25   | 628   | 650  | 1            | 1    | 0.44           | 0.01            | 22                        | 8                                        | 3UTR         |
| hsa-miR-11400 | NM_001190943 | TNFSF10    | 491   | 506  | 1            | 1    | 0.16           | 0.08            | 15                        | 14                                       | 3UTR         |
| hsa-miR-11400 | NM_006573    | TNFSF13B   | 1216  | 1233 | 1            | 1    | 1.09           | 1.49            | 17                        | 7                                        | 3UTR         |
| hsa-miR-11400 | NM_001145645 | TNFSF13B   | 1248  | 1265 | 1            | 1    | 1.09           | 1.49            | 17                        | 7                                        | 3UTR         |
| hsa-miR-11400 | NM_001297562 | TNFSF4     | 2712  | 2749 | 1            | 1    | 0.14           | 0.31            | 32                        | 10                                       | 3UTR         |
| hsa-miR-11400 | NM_003326    | TNFSF4     | 2798  | 2835 | 1            | 1    | 1.21           | 0.26            | 32                        | 10                                       | 3UTR         |
| hsa-miR-11400 | NM_003281    | TNNI1      | 3434  | 3474 | 1            | 1    | 0.34           | 0.24            | 40                        | 10                                       | 3UTR         |
| hsa-miR-11400 | XM_017002219 | TNR        | 7015  | 7035 | 1            | 1    | 0.00           | 0.00            | 20                        | 12                                       | 3UTR         |
| hsa-miR-11400 | NM_003285    | TNR        | 6629  | 6649 | 1            | 1    | 0.71           | 0.79            | 20                        | 12                                       | 3UTR         |
| hsa-miR-11400 | NM_018996    | TNRC6C     | 8502  | 8520 | 1            | 1    | -0.43          | -0.45           | 18                        | 8                                        | 3UTR         |
| hsa-miR-11400 | NM_001142640 | TNRC6C     | 8610  | 8628 | 1            | 1    | -0.43          | -0.45           | 18                        | 8                                        | 3UTR         |
| hsa-miR-11400 | XM_017004813 | TNS1       | 8489  | 8512 | 1            | 1    | 0.00           | 0.00            | 23                        | 6                                        | 3UTR         |
| hsa-miR-11400 | NM_032865    | TNS4       | 3412  | 3431 | 1            | 1    | 0.45           | 1.94            | 19                        | 10                                       | 3UTR         |
| hsa-miR-11400 | NM_001267578 | TOR1AIP1   | 2924  | 2949 | 1            | 1    | -0.30          | -0.03           | 25                        | 8                                        | 3UTR         |
| hsa-miR-11400 | NM_015602    | TOR1AIP1   | 2921  | 2946 | 1            | 1    | -0.30          | -0.03           | 25                        | 8                                        | 3UTR         |



| mirnaid       | refseqid         | genesymbol | start | end  | binding<br>p | seed | phylopste<br>m | phylopflan<br>k | binding_region_lengt<br>h | longest_<br>consecut<br>ive_pairi<br>ngs | positio<br>n |
|---------------|------------------|------------|-------|------|--------------|------|----------------|-----------------|---------------------------|------------------------------------------|--------------|
| hsa-miR-11400 | NM_032883        | TOX2       | 2024  | 2045 | 1            | 1    | -0.11          | 0.69            | 21                        | 11                                       | 3UTR         |
| hsa-miR-11400 | NM_00109879<br>6 | TOX2       | 1899  | 1920 | 1            | 1    | -0.11          | 0.69            | 21                        | 11                                       | 3UTR         |
| hsa-miR-11400 | NM_00109879<br>7 | TOX2       | 1959  | 1980 | 1            | 1    | -0.11          | 0.69            | 21                        | 11                                       | 3UTR         |
| hsa-miR-11400 | NM_00109879<br>8 | TOX2       | 1882  | 1903 | 1            | 1    | -0.11          | 0.69            | 21                        | 11                                       | 3UTR         |
| hsa-miR-11400 | NM_00125196<br>4 | TP53AIP1   | 994   | 1008 | 1            | 1    | -0.53          | 0.05            | 14                        | 8                                        | 3UTR         |
| hsa-miR-11400 | NM_00125832<br>0 | TP53I11    | 2054  | 2074 | 1            | 1    | -0.24          | -0.34           | 20                        | 8                                        | 3UTR         |
| hsa-miR-11400 | NM_00125832<br>4 | TP53I11    | 1910  | 1930 | 1            | 1    | -0.41          | -0.48           | 20                        | 8                                        | 3UTR         |
| hsa-miR-11400 | NM_00120418<br>4 | TP73       | 3174  | 3196 | 1            | 1    | 0.00           | 0.00            | 22                        | 7                                        | 3UTR         |
| hsa-miR-11400 | NM_139075        | TPCN2      | 4756  | 4774 | 0.980769     | 1    | 0.15           | -0.49           | 18                        | 11                                       | 3UTR         |
| hsa-miR-11400 | NM_139075        | TPCN2      | 3472  | 3488 | 1            | 1    | -0.16          | -0.28           | 16                        | 9                                        | 3UTR         |
| hsa-miR-11400 | NM_199359        | TPD52L2    | 788   | 809  | 1            | 1    | 0.51           | 0.56            | 21                        | 11                                       | 3UTR         |
| hsa-miR-11400 | NM_199360        | TPD52L2    | 917   | 938  | 1            | 1    | 0.51           | 0.56            | 21                        | 11                                       | 3UTR         |
| hsa-miR-11400 | NM_199361        | TPD52L2    | 857   | 878  | 1            | 1    | 0.51           | 0.56            | 21                        | 11                                       | 3UTR         |
| hsa-miR-11400 | NM_199362        | TPD52L2    | 890   | 911  | 1            | 1    | 0.51           | 0.56            | 21                        | 11                                       | 3UTR         |
| hsa-miR-11400 | NM_199363        | TPD52L2    | 830   | 851  | 1            | 1    | 0.51           | 0.56            | 21                        | 11                                       | 3UTR         |
| hsa-miR-11400 | NM_003288        | TPD52L2    | 848   | 869  | 1            | 1    | 0.51           | 0.56            | 21                        | 11                                       | 3UTR         |
| hsa-miR-11400 | NM_00124389<br>2 | TPD52L2    | 719   | 740  | 1            | 1    | 0.51           | 0.56            | 21                        | 11                                       | 3UTR         |

| mirnaid       | refseqid     | genesymbol | start | end  | binding<br>p | seed | phylopste<br>m | phylopflan<br>k | binding_region_lengt<br>h | longest_<br>consecut<br>ive_pairi<br>ngs | positio<br>n |
|---------------|--------------|------------|-------|------|--------------|------|----------------|-----------------|---------------------------|------------------------------------------|--------------|
| hsa-miR-11400 | NM_001243894 | TPD52L2    | 686   | 707  | 1            | 1    | 0.00           | 0.00            | 21                        | 11                                       | 3UTR         |
| hsa-miR-11400 | NM_004179    | TPH1       | 3612  | 3644 | 1            | 1    | 5.74           | 5.46            | 32                        | 8                                        | 3UTR         |
| hsa-miR-11400 | NM_001301227 | TPM2       | 1036  | 1073 | 0.974359     | 1    | 6.21           | 3.10            | 37                        | 9                                        | 3UTR         |
| hsa-miR-11400 | NM_003289    | TPM2       | 1036  | 1073 | 0.974359     | 1    | 6.49           | 2.50            | 37                        | 9                                        | 3UTR         |
| hsa-miR-11400 | NM_001043352 | TPM3       | 1841  | 1864 | 1            | 1    | 0.81           | 0.50            | 23                        | 8                                        | 3UTR         |
| hsa-miR-11400 | NM_001043353 | TPM3       | 1841  | 1864 | 1            | 1    | 0.81           | 0.50            | 23                        | 8                                        | 3UTR         |
| hsa-miR-11400 | NM_003292    | TPR        | 9396  | 9418 | 1            | 1    | 3.32           | 1.75            | 22                        | 11                                       | 3UTR         |
| hsa-miR-11400 | NM_003292    | TPR        | 8403  | 8423 | 1            | 1    | 2.38           | 3.02            | 20                        | 10                                       | 3UTR         |
| hsa-miR-11400 | NM_001136053 | TPRA1      | 3682  | 3700 | 1            | 1    | 0.33           | -0.03           | 18                        | 13                                       | 3UTR         |
| hsa-miR-11400 | NM_001142646 | TPRA1      | 3518  | 3536 | 1            | 1    | 0.33           | -0.03           | 18                        | 13                                       | 3UTR         |
| hsa-miR-11400 | NM_001286272 | TPT1       | 3657  | 3679 | 1            | 1    | -0.01          | 1.35            | 22                        | 6                                        | 3UTR         |
| hsa-miR-11400 | NM_001286273 | TPT1       | 3418  | 3440 | 1            | 1    | 1.09           | 1.25            | 22                        | 6                                        | 3UTR         |
| hsa-miR-11400 | NM_003295    | TPT1       | 3492  | 3514 | 1            | 1    | 2.04           | 0.93            | 22                        | 6                                        | 3UTR         |
| hsa-miR-11400 | NM_005658    | TRAF1      | 3785  | 3829 | 1            | 1    | 1.70           | 1.25            | 44                        | 12                                       | 3UTR         |
| hsa-miR-11400 | NM_001190945 | TRAF1      | 3735  | 3779 | 1            | 1    | 1.21           | 1.15            | 44                        | 12                                       | 3UTR         |
| hsa-miR-11400 | NM_001190947 | TRAF1      | 3160  | 3204 | 1            | 1    | 2.81           | 2.84            | 44                        | 12                                       | 3UTR         |
| hsa-miR-11400 | NM_004620    | TRAF6      | 5069  | 5089 | 1            | 1    | 0.01           | 0.28            | 20                        | 15                                       | 3UTR         |

| mirnaid       | refseqid     | genesymbol | start | end  | binding<br>p | seed | phylopste<br>m | phylopflan<br>k | binding_region_lengt<br>h | longest_<br>consecut<br>ive_pairi<br>ngs | positio<br>n |
|---------------|--------------|------------|-------|------|--------------|------|----------------|-----------------|---------------------------|------------------------------------------|--------------|
| hsa-miR-11400 | NM_004620    | TRAF6      | 2663  | 2679 | 1            | 1    | -0.01          | -0.09           | 16                        | 15                                       | 3UTR         |
| hsa-miR-11400 | NM_001265609 | TRAK1      | 2408  | 2423 | 0.980769     | 1    | 1.02           | 0.83            | 15                        | 14                                       | 3UTR         |
| hsa-miR-11400 | NM_014965    | TRAK1      | 2324  | 2339 | 0.980769     | 1    | 1.02           | 0.83            | 15                        | 14                                       | 3UTR         |
| hsa-miR-11400 | NM_015049    | TRAK2      | 3364  | 3389 | 1            | 1    | 2.61           | 2.58            | 25                        | 12                                       | 3UTR         |
| hsa-miR-11400 | NM_003274    | TRAPPC10   | 4081  | 4111 | 1            | 1    | 0.82           | 0.40            | 30                        | 10                                       | 3UTR         |
| hsa-miR-11400 | NM_177452    | TRAPPC6B   | 851   | 871  | 1            | 1    | -0.27          | 0.23            | 20                        | 7                                        | 3UTR         |
| hsa-miR-11400 | NM_001079537 | TRAPPC6B   | 935   | 955  | 1            | 1    | -0.11          | 0.16            | 20                        | 7                                        | 3UTR         |
| hsa-miR-11400 | NM_198153    | TREML4     | 2077  | 2095 | 1            | 1    | -0.17          | -0.37           | 18                        | 10                                       | 3UTR         |
| hsa-miR-11400 | NM_013381    | TRHDE      | 7632  | 7678 | 1            | 1    | -0.69          | -0.01           | 18                        | 16                                       | 3UTR         |
| hsa-miR-11400 | NM_052828    | TRIM10     | 2624  | 2641 | 0.974359     | 1    | 1.41           | 0.48            | 17                        | 14                                       | 3UTR         |
| hsa-miR-11400 | NM_006778    | TRIM10     | 3163  | 3180 | 0.974359     | 1    | 1.52           | 0.58            | 17                        | 14                                       | 3UTR         |
| hsa-miR-11400 | XM_006714158 | TRIM2      | 5370  | 5392 | 1            | 1    | 0.00           | 0.00            | 22                        | 7                                        | 3UTR         |
| hsa-miR-11400 | XM_006714160 | TRIM2      | 6170  | 6192 | 1            | 1    | 0.00           | 0.00            | 22                        | 7                                        | 3UTR         |
| hsa-miR-11400 | XM_006714161 | TRIM2      | 6167  | 6189 | 1            | 1    | 0.00           | 0.00            | 22                        | 7                                        | 3UTR         |
| hsa-miR-11400 | XM_017007944 | TRIM2      | 6158  | 6180 | 1            | 1    | 0.00           | 0.00            | 22                        | 7                                        | 3UTR         |
| hsa-miR-11400 | XM_017007946 | TRIM2      | 5475  | 5497 | 1            | 1    | 0.00           | 0.00            | 22                        | 7                                        | 3UTR         |
| hsa-miR-11400 | XM_017007947 | TRIM2      | 5472  | 5494 | 1            | 1    | 0.00           | 0.00            | 22                        | 7                                        | 3UTR         |

| mirnaid       | refseqid     | genesymbol | start | end  | binding<br>p | seed | phylopste<br>m | phylopflan<br>k | binding_region_lengt<br>h | longest_<br>consecut<br>ive_pairi<br>ngs | positio<br>n |
|---------------|--------------|------------|-------|------|--------------|------|----------------|-----------------|---------------------------|------------------------------------------|--------------|
| hsa-miR-11400 | XM_017007948 | TRIM2      | 5425  | 5447 | 1            | 1    | 0.00           | 0.00            | 22                        | 7                                        | 3UTR         |
| hsa-miR-11400 | XM_017007950 | TRIM2      | 5878  | 5900 | 1            | 1    | 0.00           | 0.00            | 22                        | 7                                        | 3UTR         |
| hsa-miR-11400 | NM_015271    | TRIM2      | 3575  | 3596 | 1            | 1    | 0.66           | 1.79            | 21                        | 12                                       | 3UTR         |
| hsa-miR-11400 | NM_001351054 | TRIM2      | 3698  | 3719 | 1            | 1    | 0.66           | 1.79            | 21                        | 12                                       | 3UTR         |
| hsa-miR-11400 | NM_001351055 | TRIM2      | 3695  | 3716 | 1            | 1    | 0.66           | 1.79            | 21                        | 12                                       | 3UTR         |
| hsa-miR-11400 | NM_001351056 | TRIM2      | 3745  | 3766 | 1            | 1    | 0.66           | 1.79            | 21                        | 12                                       | 3UTR         |
| hsa-miR-11400 | NM_001375488 | TRIM2      | 3668  | 3689 | 1            | 1    | 0.66           | 1.79            | 21                        | 12                                       | 3UTR         |
| hsa-miR-11400 | NM_001375489 | TRIM2      | 3665  | 3686 | 1            | 1    | 0.66           | 1.79            | 21                        | 12                                       | 3UTR         |
| hsa-miR-11400 | NM_001375490 | TRIM2      | 3518  | 3539 | 1            | 1    | 0.66           | 1.79            | 21                        | 12                                       | 3UTR         |
| hsa-miR-11400 | NM_001375491 | TRIM2      | 3515  | 3536 | 1            | 1    | 0.66           | 1.79            | 21                        | 12                                       | 3UTR         |
| hsa-miR-11400 | NM_001375512 | TRIM2      | 4369  | 4390 | 1            | 1    | 0.66           | 1.79            | 21                        | 12                                       | 3UTR         |
| hsa-miR-11400 | NM_001375513 | TRIM2      | 3733  | 3754 | 1            | 1    | 0.66           | 1.79            | 21                        | 12                                       | 3UTR         |
| hsa-miR-11400 | NM_001375514 | TRIM2      | 3738  | 3759 | 1            | 1    | 0.66           | 1.79            | 21                        | 12                                       | 3UTR         |
| hsa-miR-11400 | NM_001375515 | TRIM2      | 3650  | 3671 | 1            | 1    | 0.66           | 1.79            | 21                        | 12                                       | 3UTR         |
| hsa-miR-11400 | NM_001375516 | TRIM2      | 3660  | 3681 | 1            | 1    | 0.66           | 1.79            | 21                        | 12                                       | 3UTR         |
| hsa-miR-11400 | NM_001375517 | TRIM2      | 3574  | 3595 | 1            | 1    | 0.66           | 1.79            | 21                        | 12                                       | 3UTR         |
| hsa-miR-11400 | NM_001375519 | TRIM2      | 3242  | 3263 | 1            | 1    | 0.66           | 1.79            | 21                        | 12                                       | 3UTR         |

| mirnaid       | refseqid     | genesymbol | start | end  | binding<br>p | seed | phylopste<br>m | phylopflan<br>k | binding_region_lengt<br>h | longest_<br>consecut<br>ive_pairi<br>ngs | positio<br>n |
|---------------|--------------|------------|-------|------|--------------|------|----------------|-----------------|---------------------------|------------------------------------------|--------------|
| hsa-miR-11400 | NM_001375520 | TRIM2      | 3239  | 3260 | 1            | 1    | 0.66           | 1.79            | 21                        | 12                                       | 3UTR         |
| hsa-miR-11400 | NM_001375522 | TRIM2      | 3522  | 3543 | 1            | 1    | 0.66           | 1.79            | 21                        | 12                                       | 3UTR         |
| hsa-miR-11400 | NM_001375525 | TRIM2      | 3465  | 3486 | 1            | 1    | 0.66           | 1.79            | 21                        | 12                                       | 3UTR         |
| hsa-miR-11400 | NM_001130067 | TRIM2      | 3647  | 3668 | 1            | 1    | 0.66           | 1.79            | 21                        | 12                                       | 3UTR         |
| hsa-miR-11400 | NM_015905    | TRIM24     | 6624  | 6644 | 1            | 1    | -0.55          | -0.03           | 20                        | 15                                       | 3UTR         |
| hsa-miR-11400 | NM_003852    | TRIM24     | 6522  | 6542 | 1            | 1    | -0.55          | -0.03           | 20                        | 15                                       | 3UTR         |
| hsa-miR-11400 | XM_005249374 | TRIM26     | 2661  | 2681 | 1            | 1    | 0.00           | 0.00            | 20                        | 10                                       | 3UTR         |
| hsa-miR-11400 | NM_003449    | TRIM26     | 2777  | 2797 | 1            | 1    | 0.62           | 1.09            | 20                        | 10                                       | 3UTR         |
| hsa-miR-11400 | NM_001242783 | TRIM26     | 2556  | 2576 | 1            | 1    | 0.00           | 0.00            | 20                        | 10                                       | 3UTR         |
| hsa-miR-11400 | NM_001330382 | TRIM29     | 1604  | 1625 | 1            | 1    | 3.77           | 2.74            | 21                        | 8                                        | 3UTR         |
| hsa-miR-11400 | NM_012210    | TRIM32     | 2688  | 2704 | 1            | 1    | 0.00           | 0.39            | 16                        | 11                                       | 3UTR         |
| hsa-miR-11400 | NM_001099679 | TRIM32     | 2685  | 2701 | 1            | 1    | 0.00           | 0.39            | 16                        | 11                                       | 3UTR         |
| hsa-miR-11400 | NM_172016    | TRIM39     | 2243  | 2285 | 1            | 1    | 0.97           | 0.21            | 20                        | 14                                       | 3UTR         |
| hsa-miR-11400 | NM_021253    | TRIM39     | 2394  | 2436 | 1            | 1    | 0.87           | 0.18            | 20                        | 14                                       | 3UTR         |
| hsa-miR-11400 | NM_001369521 | TRIM39     | 2304  | 2346 | 1            | 1    | 0.87           | 0.18            | 20                        | 14                                       | 3UTR         |
| hsa-miR-11400 | NM_001369523 | TRIM39     | 2349  | 2391 | 1            | 1    | 0.88           | 0.18            | 20                        | 14                                       | 3UTR         |
| hsa-miR-11400 | NM_033091    | TRIM4      | 1820  | 1842 | 1            | 1    | 0.74           | 0.55            | 22                        | 6                                        | 3UTR         |

| mirnaid       | refseqid     | genesymbol | start | end  | binding<br>p | seed | phylopste<br>m | phylopflan<br>k | binding_region_lengt<br>h | longest_<br>consecut<br>ive_pairi<br>ngs | positio<br>n |
|---------------|--------------|------------|-------|------|--------------|------|----------------|-----------------|---------------------------|------------------------------------------|--------------|
| hsa-miR-11400 | NM_033452    | TRIM47     | 2157  | 2177 | 1            | 1    | 1.94           | 1.76            | 20                        | 9                                        | 3UTR         |
| hsa-miR-11400 | XM_011544192 | TRIM67     | 8051  | 8077 | 1            | 1    | 0.00           | 0.00            | 26                        | 9                                        | 3UTR         |
| hsa-miR-11400 | NM_030912    | TRIM8      | 1988  | 2009 | 1            | 1    | 1.14           | 1.08            | 21                        | 17                                       | 3UTR         |
| hsa-miR-11400 | XM_011536389 | TRIM9      | 5682  | 5704 | 1            | 1    | 0.00           | 0.00            | 22                        | 11                                       | 3UTR         |
| hsa-miR-11400 | NM_007032    | TRIOBP     | 4483  | 4503 | 1            | 1    | 0.00           | 0.00            | 20                        | 10                                       | 3UTR         |
| hsa-miR-11400 | NM_001039141 | TRIOBP     | 9829  | 9849 | 1            | 1    | -0.26          | -0.41           | 20                        | 10                                       | 3UTR         |
| hsa-miR-11400 | NM_004239    | TRIP11     | 7504  | 7529 | 1            | 1    | 2.15           | 2.06            | 25                        | 8                                        | 3UTR         |
| hsa-miR-11400 | NM_182984    | TRMT2A     | 2134  | 2175 | 0.980769     | 1    | 2.63           | 2.65            | 23                        | 8                                        | 3UTR         |
| hsa-miR-11400 | NM_012471    | TRPC5      | 7561  | 7580 | 1            | 1    | 0.00           | 0.00            | 19                        | 10                                       | 3UTR         |
| hsa-miR-11400 | NM_019841    | TRPV5      | 2860  | 2879 | 1            | 1    | -0.48          | -0.09           | 19                        | 11                                       | 3UTR         |
| hsa-miR-11400 | NM_015679    | TRUB2      | 4312  | 4336 | 1            | 1    | -0.03          | -0.17           | 24                        | 12                                       | 3UTR         |
| hsa-miR-11400 | NM_021055    | TSC2       | 5586  | 5627 | 1            | 1    | 0.00           | 0.00            | 22                        | 8                                        | 3UTR         |
| hsa-miR-11400 | NM_001318827 | TSC2       | 5406  | 5447 | 1            | 1    | 0.00           | 0.00            | 22                        | 8                                        | 3UTR         |
| hsa-miR-11400 | NM_001318829 | TSC2       | 5350  | 5391 | 1            | 1    | 0.00           | 0.00            | 22                        | 8                                        | 3UTR         |
| hsa-miR-11400 | NM_001318832 | TSC2       | 5505  | 5546 | 1            | 1    | 0.00           | 0.00            | 22                        | 8                                        | 3UTR         |
| hsa-miR-11400 | NM_001363528 | TSC2       | 5517  | 5558 | 1            | 1    | 0.00           | 0.00            | 22                        | 8                                        | 3UTR         |
| hsa-miR-11400 | NM_001077183 | TSC2       | 5514  | 5555 | 1            | 1    | 0.00           | 0.00            | 22                        | 8                                        | 3UTR         |

| mirnaid       | refseqid     | genesymbol | start | end  | binding<br>p | seed | phylopste<br>m | phylopflan<br>k | binding_region_lengt<br>h | longest_<br>consecut<br>ive_pairi<br>ngs | positio<br>n |
|---------------|--------------|------------|-------|------|--------------|------|----------------|-----------------|---------------------------|------------------------------------------|--------------|
| hsa-miR-11400 | NM_001114382 | TSC2       | 5646  | 5687 | 1            | 1    | 0.00           | 0.00            | 22                        | 8                                        | 3UTR         |
| hsa-miR-11400 | XM_005262100 | TSC22D3    | 1284  | 1362 | 1            | 1    | 0.00           | 0.00            | 22                        | 10                                       | 3UTR         |
| hsa-miR-11400 | NM_001318468 | TSC22D3    | 1395  | 1473 | 1            | 1    | 0.00           | 0.00            | 22                        | 10                                       | 3UTR         |
| hsa-miR-11400 | NM_001318470 | TSC22D3    | 1381  | 1459 | 1            | 1    | 0.00           | 0.00            | 22                        | 10                                       | 3UTR         |
| hsa-miR-11400 | NM_173485    | TSHZ2      | 7416  | 7436 | 1            | 1    | 0.36           | 0.97            | 20                        | 9                                        | 3UTR         |
| hsa-miR-11400 | NM_001193421 | TSHZ2      | 6834  | 6854 | 1            | 1    | 0.36           | 0.97            | 20                        | 9                                        | 3UTR         |
| hsa-miR-11400 | NM_130783    | TSPAN18    | 1742  | 1760 | 1            | 1    | -0.20          | -0.41           | 18                        | 10                                       | 3UTR         |
| hsa-miR-11400 | XM_006718373 | TSPAN18    | 1673  | 1691 | 1            | 1    | 0.00           | 0.00            | 18                        | 10                                       | 3UTR         |
| hsa-miR-11400 | XM_011520459 | TSPAN18    | 1574  | 1592 | 1            | 1    | 0.00           | 0.00            | 18                        | 10                                       | 3UTR         |
| hsa-miR-11400 | NM_178562    | TSPAN33    | 1273  | 1293 | 1            | 1    | -0.12          | 0.27            | 20                        | 13                                       | 3UTR         |
| hsa-miR-11400 | XM_017011367 | TTBK1      | 2892  | 2917 | 1            | 1    | 0.00           | 0.00            | 25                        | 7                                        | 3UTR         |
| hsa-miR-11400 | XM_017011367 | TTBK1      | 5111  | 5131 | 1            | 1    | 0.00           | 0.00            | 20                        | 8                                        | 3UTR         |
| hsa-miR-11400 | NM_001114108 | TTC22      | 2368  | 2386 | 1            | 1    | 4.24           | 3.29            | 18                        | 7                                        | 3UTR         |
| hsa-miR-11400 | NM_001297662 | TTC39A     | 1695  | 1720 | 1            | 1    | 4.13           | 2.43            | 25                        | 8                                        | 3UTR         |
| hsa-miR-11400 | NM_001168342 | TTC39B     | 3382  | 3401 | 1            | 1    | -0.05          | -0.37           | 19                        | 18                                       | 3UTR         |
| hsa-miR-11400 | XM_011533000 | TTC7A      | 2290  | 2314 | 1            | 1    | 0.00           | 0.00            | 24                        | 8                                        | 3UTR         |
| hsa-miR-11400 | XM_011533000 | TTC7A      | 2787  | 2806 | 1            | 1    | 0.00           | 0.00            | 19                        | 11                                       | 3UTR         |

| mirnaid       | refseqid     | genesymbol | start | end  | binding<br>p | seed | phylopste<br>m | phylopflan<br>k | binding_region_lengt<br>h | longest_<br>consecut<br>ive_pairi<br>ngs | positio<br>n |
|---------------|--------------|------------|-------|------|--------------|------|----------------|-----------------|---------------------------|------------------------------------------|--------------|
| hsa-miR-11400 | XM_024453013 | TTC7A      | 1893  | 1917 | 1            | 1    | 0.00           | 0.00            | 24                        | 8                                        | 3UTR         |
| hsa-miR-11400 | XM_024453013 | TTC7A      | 2390  | 2409 | 1            | 1    | 0.00           | 0.00            | 19                        | 11                                       | 3UTR         |
| hsa-miR-11400 | NM_001010854 | TTC7B      | 7665  | 7683 | 1            | 1    | -0.24          | -0.07           | 18                        | 10                                       | 3UTR         |
| hsa-miR-11400 | NM_001139442 | TTLL11     | 3594  | 3631 | 1            | 1    | 0.05           | -0.42           | 37                        | 10                                       | 3UTR         |
| hsa-miR-11400 | NM_001367620 | TTLL9      | 1754  | 1773 | 1            | 1    | 0.09           | 0.05            | 19                        | 9                                        | 3UTR         |
| hsa-miR-11400 | NM_001008409 | TTLL9      | 2303  | 2322 | 1            | 1    | 0.09           | 0.05            | 19                        | 9                                        | 3UTR         |
| hsa-miR-11400 | NM_001261839 | TTPAL      | 5960  | 5989 | 1            | 1    | 0.80           | 1.44            | 21                        | 16                                       | 3UTR         |
| hsa-miR-11400 | NM_024331    | TTPAL      | 6086  | 6115 | 1            | 1    | 0.80           | 1.44            | 21                        | 16                                       | 3UTR         |
| hsa-miR-11400 | NM_001039199 | TTPAL      | 6062  | 6091 | 1            | 1    | 0.80           | 1.44            | 21                        | 16                                       | 3UTR         |
| hsa-miR-11400 | NM_001286414 | TUBGCP4    | 5017  | 5036 | 1            | 1    | 3.38           | 2.67            | 19                        | 8                                        | 3UTR         |
| hsa-miR-11400 | NM_014444    | TUBGCP4    | 5014  | 5033 | 1            | 1    | 3.38           | 2.67            | 19                        | 8                                        | 3UTR         |
| hsa-miR-11400 | NM_052903    | TUBGCP5    | 3213  | 3236 | 0.953846     | 1    | 4.64           | 3.26            | 23                        | 9                                        | 3UTR         |
| hsa-miR-11400 | XM_017013861 | TUSC3      | 3579  | 3600 | 1            | 1    | 0.00           | 0.00            | 21                        | 12                                       | 3UTR         |
| hsa-miR-11400 | XM_006720944 | TVP23A     | 1092  | 1127 | 1            | 1    | 0.00           | 0.00            | 19                        | 17                                       | 3UTR         |
| hsa-miR-11400 | XM_017023651 | TVP23A     | 1410  | 1428 | 1            | 1    | 0.00           | 0.00            | 18                        | 7                                        | 3UTR         |
| hsa-miR-11400 | NM_175852    | TXLNA      | 3787  | 3806 | 1            | 1    | -0.10          | 0.14            | 19                        | 15                                       | 3UTR         |
| hsa-miR-11400 | NM_001376857 | TXLNA      | 3934  | 3953 | 1            | 1    | -0.10          | 0.14            | 19                        | 15                                       | 3UTR         |



| mirnaid       | refseqid     | genesymbol | start | end  | binding<br>p | seed | phylopste<br>m | phylopflan<br>k | binding_region_lengt<br>h | longest_<br>consecut<br>ive_pairi<br>ngs | positio<br>n |
|---------------|--------------|------------|-------|------|--------------|------|----------------|-----------------|---------------------------|------------------------------------------|--------------|
| hsa-miR-11400 | NM_153235    | TXLNB      | 4013  | 4030 | 1            | 1    | 4.20           | 3.21            | 17                        | 10                                       | 3UTR         |
| hsa-miR-11400 | NM_032731    | TXNDC17    | 917   | 957  | 1            | 1    | -0.06          | -0.18           | 17                        | 15                                       | 3UTR         |
| hsa-miR-11400 | NM_001313972 | TXNIP      | 2323  | 2356 | 1            | 1    | 1.36           | 2.09            | 33                        | 10                                       | 3UTR         |
| hsa-miR-11400 | NM_001305563 | TXNL4A     | 1936  | 1957 | 1            | 1    | -0.08          | -0.16           | 21                        | 9                                        | 3UTR         |
| hsa-miR-11400 | NM_006701    | TXNL4A     | 2117  | 2138 | 1            | 1    | -0.18          | -0.18           | 21                        | 9                                        | 3UTR         |
| hsa-miR-11400 | NM_001330264 | TYRO3      | 5033  | 5058 | 1            | 1    | 0.00           | 0.00            | 25                        | 8                                        | 3UTR         |
| hsa-miR-11400 | NM_138467    | TYW3       | 1728  | 1746 | 0.980769     | 1    | -0.20          | -0.12           | 18                        | 11                                       | 3UTR         |
| hsa-miR-11400 | NM_001162916 | TYW3       | 1629  | 1647 | 0.980769     | 1    | -0.20          | -0.12           | 18                        | 11                                       | 3UTR         |
| hsa-miR-11400 | NM_001039693 | TYW5       | 3883  | 3902 | 1            | 1    | 0.39           | 0.50            | 19                        | 9                                        | 3UTR         |
| hsa-miR-11400 | NM_001039693 | TYW5       | 2814  | 2848 | 1            | 1    | 0.69           | 0.19            | 34                        | 10                                       | 3UTR         |
| hsa-miR-11400 | NM_024818    | UBA5       | 1809  | 1840 | 1            | 1    | -0.08          | -0.04           | 31                        | 10                                       | 3UTR         |
| hsa-miR-11400 | NM_001320210 | UBA5       | 2159  | 2190 | 1            | 1    | 0.21           | 0.06            | 31                        | 10                                       | 3UTR         |
| hsa-miR-11400 | NM_018227    | UBA6       | 5494  | 5513 | 1            | 1    | 0.70           | 0.80            | 19                        | 12                                       | 3UTR         |
| hsa-miR-11400 | NM_016172    | UBAC1      | 1542  | 1560 | 0.961538     | 1    | 2.61           | 2.93            | 18                        | 9                                        | 3UTR         |
| hsa-miR-11400 | XM_005265431 | UBE2E1     | 1348  | 1375 | 1            | 1    | 0.00           | 0.00            | 21                        | 12                                       | 3UTR         |
| hsa-miR-11400 | NM_001202476 | UBE2E1     | 1361  | 1372 | 1            | 1    | 0.60           | -1.38           | 11                        | 10                                       | 3UTR         |
| hsa-miR-11400 | XM_024450432 | UBE2I      | 1831  | 1867 | 1            | 1    | 0.00           | 0.00            | 18                        | 8                                        | 3UTR         |

| mirnaid       | refseqid     | genesymbol | start | end  | binding<br>p | seed | phylopste<br>m | phylopflan<br>k | binding_region_lengt<br>h | longest_<br>consecut<br>ive_pairi<br>ngs | positio<br>n |
|---------------|--------------|------------|-------|------|--------------|------|----------------|-----------------|---------------------------|------------------------------------------|--------------|
| hsa-miR-11400 | NM_152489    | UBE2U      | 2872  | 2893 | 0.980769     | 1    | 0.68           | -0.11           | 21                        | 11                                       | 3UTR         |
| hsa-miR-11400 | NM_199144    | UBE2V1     | 2054  | 2099 | 1            | 1    | 2.20           | 2.99            | 38                        | 8                                        | 3UTR         |
| hsa-miR-11400 | NM_003350    | UBE2V2     | 3573  | 3590 | 1            | 1    | 0.16           | 0.24            | 17                        | 16                                       | 3UTR         |
| hsa-miR-11400 | NM_018299    | UBE2W      | 1154  | 1176 | 1            | 1    | 0.88           | 0.29            | 22                        | 9                                        | 3UTR         |
| hsa-miR-11400 | NM_001001481 | UBE2W      | 1187  | 1209 | 1            | 1    | 0.95           | 0.25            | 22                        | 9                                        | 3UTR         |
| hsa-miR-11400 | XM_005263422 | UBE4B      | 5798  | 5817 | 0.974359     | 1    | 0.00           | 0.00            | 19                        | 8                                        | 3UTR         |
| hsa-miR-11400 | NM_001330350 | UBIAD1     | 3310  | 3326 | 1            | 1    | -0.16          | -0.07           | 16                        | 15                                       | 3UTR         |
| hsa-miR-11400 | NM_203412    | UBL4B      | 1434  | 1451 | 1            | 1    | -0.14          | -0.26           | 17                        | 8                                        | 3UTR         |
| hsa-miR-11400 | NM_199415    | UBOX5      | 3512  | 3537 | 1            | 1    | 4.25           | 2.11            | 25                        | 8                                        | 3UTR         |
| hsa-miR-11400 | NM_014948    | UBOX5      | 3674  | 3699 | 1            | 1    | 4.25           | 2.11            | 25                        | 8                                        | 3UTR         |
| hsa-miR-11400 | NM_024954    | UBTD1      | 1471  | 1503 | 1            | 1    | 0.98           | 0.37            | 24                        | 8                                        | 3UTR         |
| hsa-miR-11400 | XM_006722059 | UBTF       | 4466  | 4489 | 1            | 1    | 0.00           | 0.00            | 23                        | 8                                        | 3UTR         |
| hsa-miR-11400 | NM_014233    | UBTF       | 4577  | 4600 | 1            | 1    | 0.08           | 0.47            | 23                        | 8                                        | 3UTR         |
| hsa-miR-11400 | NM_001076684 | UBTF       | 4466  | 4489 | 1            | 1    | 0.08           | 0.47            | 23                        | 8                                        | 3UTR         |
| hsa-miR-11400 | NM_152376    | UBXN10     | 4025  | 4048 | 1            | 1    | -0.14          | -0.03           | 23                        | 8                                        | 3UTR         |
| hsa-miR-11400 | NM_004181    | UCHL1      | 858   | 900  | 1            | 1    | 0.42           | 0.77            | 18                        | 16                                       | 3UTR         |
| hsa-miR-11400 | NM_003356    | UCP3       | 2042  | 2062 | 1            | 1    | 2.00           | 2.73            | 20                        | 16                                       | 3UTR         |

| mirnaid       | refseqid     | genesymbol | start | end  | binding<br>p | seed | phylopste<br>m | phylopflan<br>k | binding_region_lengt<br>h | longest_<br>consecut<br>ive_pairi<br>ngs | positio<br>n |
|---------------|--------------|------------|-------|------|--------------|------|----------------|-----------------|---------------------------|------------------------------------------|--------------|
| hsa-miR-11400 | NM_003360    | UGT8       | 3437  | 3453 | 1            | 1    | 0.43           | 0.47            | 16                        | 15                                       | 3UTR         |
| hsa-miR-11400 | NM_001128174 | UGT8       | 3093  | 3109 | 1            | 1    | 0.43           | 0.47            | 16                        | 15                                       | 3UTR         |
| hsa-miR-11400 | NM_144624    | UHMK1      | 5221  | 5239 | 1            | 1    | 0.27           | 0.34            | 18                        | 17                                       | 3UTR         |
| hsa-miR-11400 | NM_175866    | UHMK1      | 5297  | 5315 | 1            | 1    | 0.27           | 0.34            | 18                        | 17                                       | 3UTR         |
| hsa-miR-11400 | NM_001184763 | UHMK1      | 4962  | 4987 | 1            | 1    | 0.42           | 0.32            | 19                        | 17                                       | 3UTR         |
| hsa-miR-11400 | NM_001006947 | UHRF1BP1L  | 1850  | 1877 | 1            | 1    | 0.41           | 0.53            | 27                        | 10                                       | 3UTR         |
| hsa-miR-11400 | NM_152896    | UHRF2      | 3116  | 3148 | 1            | 1    | 1.46           | 2.07            | 32                        | 8                                        | 3UTR         |
| hsa-miR-11400 | NM_001080533 | UNC119B    | 826   | 848  | 1            | 1    | -0.22          | 0.47            | 22                        | 11                                       | 3UTR         |
| hsa-miR-11400 | XM_011527811 | UNC13A     | 8527  | 8550 | 1            | 1    | 0.00           | 0.00            | 23                        | 10                                       | 3UTR         |
| hsa-miR-11400 | NM_001080421 | UNC13A     | 8451  | 8474 | 1            | 1    | 3.35           | 3.33            | 23                        | 10                                       | 3UTR         |
| hsa-miR-11400 | NM_001297549 | UPF1       | 4704  | 4727 | 1            | 1    | -0.53          | -0.34           | 23                        | 10                                       | 3UTR         |
| hsa-miR-11400 | NM_002911    | UPF1       | 4671  | 4694 | 1            | 1    | -0.53          | -0.34           | 23                        | 10                                       | 3UTR         |
| hsa-miR-11400 | NM_013387    | UQCR10     | 609   | 630  | 1            | 1    | 0.25           | 0.55            | 17                        | 8                                        | 3UTR         |
| hsa-miR-11400 | NM_001003684 | UQCR10     | 668   | 689  | 1            | 1    | 0.25           | 0.55            | 17                        | 8                                        | 3UTR         |
| hsa-miR-11400 | NM_003365    | UQCRC1     | 1486  | 1505 | 1            | 1    | 1.91           | 1.06            | 19                        | 11                                       | 3UTR         |
| hsa-miR-11400 | NM_001290075 | URGCP      | 3000  | 3032 | 1            | 1    | 3.13           | 1.61            | 32                        | 8                                        | 3UTR         |
| hsa-miR-11400 | NM_017920    | URGCP      | 2978  | 3010 | 1            | 1    | 2.57           | 2.12            | 32                        | 8                                        | 3UTR         |

| mirnaid       | refseqid     | genesymbol | start | end   | binding<br>p | seed | phylopste<br>m | phylopflan<br>k | binding_region_lengt<br>h | longest_<br>consecut<br>ive_pairi<br>ngs | positio<br>n |
|---------------|--------------|------------|-------|-------|--------------|------|----------------|-----------------|---------------------------|------------------------------------------|--------------|
| hsa-miR-11400 | XM_005270140 | UROS       | 2320  | 2354  | 1            | 1    | 0.00           | 0.00            | 18                        | 16                                       | 3UTR         |
| hsa-miR-11400 | XM_005270140 | UROS       | 2566  | 2584  | 1            | 1    | 0.00           | 0.00            | 18                        | 10                                       | 3UTR         |
| hsa-miR-11400 | NM_024598    | USB1       | 2083  | 2100  | 1            | 1    | -0.56          | -0.03           | 17                        | 16                                       | 3UTR         |
| hsa-miR-11400 | NM_001330568 | USB1       | 1989  | 2006  | 1            | 1    | -0.56          | -0.03           | 17                        | 16                                       | 3UTR         |
| hsa-miR-11400 | NM_001195302 | USB1       | 2029  | 2046  | 1            | 1    | -0.56          | -0.03           | 17                        | 16                                       | 3UTR         |
| hsa-miR-11400 | XM_005259197 | USF2       | 1288  | 1310  | 1            | 1    | 0.00           | 0.00            | 22                        | 9                                        | 3UTR         |
| hsa-miR-11400 | NM_182488    | USP12      | 1494  | 1537  | 1            | 1    | 1.40           | 2.09            | 16                        | 14                                       | 3UTR         |
| hsa-miR-11400 | NM_005151    | USP14      | 4834  | 4852  | 0.961538     | 1    | 0.81           | 1.33            | 18                        | 9                                        | 3UTR         |
| hsa-miR-11400 | NM_001037334 | USP14      | 4729  | 4747  | 0.961538     | 1    | 0.81           | 1.33            | 18                        | 9                                        | 3UTR         |
| hsa-miR-11400 | NM_005151    | USP14      | 3121  | 3138  | 1            | 1    | -0.07          | 0.12            | 17                        | 16                                       | 3UTR         |
| hsa-miR-11400 | NM_001037334 | USP14      | 3016  | 3033  | 1            | 1    | -0.07          | 0.12            | 17                        | 16                                       | 3UTR         |
| hsa-miR-11400 | NM_006313    | USP15      | 12415 | 12435 | 1            | 1    | -0.09          | 0.04            | 20                        | 14                                       | 3UTR         |
| hsa-miR-11400 | NM_006313    | USP15      | 10482 | 10500 | 1            | 1    | 0.21           | 0.03            | 18                        | 9                                        | 3UTR         |
| hsa-miR-11400 | NM_001252078 | USP15      | 12502 | 12522 | 1            | 1    | -0.09          | 0.04            | 20                        | 14                                       | 3UTR         |
| hsa-miR-11400 | NM_001252078 | USP15      | 10569 | 10587 | 1            | 1    | 0.21           | 0.03            | 18                        | 9                                        | 3UTR         |
| hsa-miR-11400 | NM_022832    | USP46      | 6480  | 6506  | 1            | 1    | 1.56           | 1.31            | 26                        | 9                                        | 3UTR         |
| hsa-miR-11400 | NM_001384542 | USP49      | 2569  | 2586  | 1            | 1    | 0.33           | 0.42            | 17                        | 8                                        | 3UTR         |

| mirnaid       | refseqid     | genesymbol | start | end   | binding<br>p | seed | phylopste<br>m | phylopflan<br>k | binding_region_lengt<br>h | longest_<br>consecut<br>ive_pairi<br>ngs | positio<br>n |
|---------------|--------------|------------|-------|-------|--------------|------|----------------|-----------------|---------------------------|------------------------------------------|--------------|
| hsa-miR-11400 | NM_001080491 | USP6NL     | 10307 | 10329 | 1            | 1    | 0.00           | 0.00            | 22                        | 9                                        | 3UTR         |
| hsa-miR-11400 | NM_014388    | UTP25      | 6459  | 6497  | 1            | 1    | -0.32          | 0.00            | 38                        | 9                                        | 3UTR         |
| hsa-miR-11400 | NM_003762    | VAMP4      | 1045  | 1060  | 1            | 1    | 0.31           | 0.04            | 15                        | 11                                       | 3UTR         |
| hsa-miR-11400 | NM_001185127 | VAMP4      | 1042  | 1057  | 1            | 1    | 0.02           | 0.07            | 15                        | 11                                       | 3UTR         |
| hsa-miR-11400 | NM_001287044 | VEGFA      | 722   | 744   | 1            | 1    | 0.25           | 1.89            | 22                        | 8                                        | 3UTR         |
| hsa-miR-11400 | NM_001128220 | VGLL4      | 2056  | 2082  | 1            | 1    | 0.14           | 2.27            | 26                        | 13                                       | 3UTR         |
| hsa-miR-11400 | NM_001128221 | VGLL4      | 2179  | 2205  | 1            | 1    | 0.36           | 2.87            | 26                        | 13                                       | 3UTR         |
| hsa-miR-11400 | NM_004624    | VIPR1      | 1612  | 1635  | 1            | 1    | -0.72          | -0.41           | 23                        | 13                                       | 3UTR         |
| hsa-miR-11400 | NM_001251882 | VIPR1      | 2020  | 2043  | 1            | 1    | 0.00           | 0.00            | 23                        | 13                                       | 3UTR         |
| hsa-miR-11400 | NM_001251883 | VIPR1      | 1249  | 1272  | 1            | 1    | -0.68          | -0.46           | 23                        | 13                                       | 3UTR         |
| hsa-miR-11400 | NM_001251884 | VIPR1      | 1503  | 1526  | 1            | 1    | -0.68          | -0.46           | 23                        | 13                                       | 3UTR         |
| hsa-miR-11400 | NM_001128159 | VPS53      | 10823 | 10844 | 1            | 1    | 0.00           | 0.00            | 21                        | 8                                        | 3UTR         |
| hsa-miR-11400 | NM_001128159 | VPS53      | 10685 | 10706 | 1            | 1    | 0.00           | 0.00            | 21                        | 8                                        | 3UTR         |
| hsa-miR-11400 | NM_001288838 | VRK2       | 2107  | 2126  | 1            | 1    | 0.86           | 0.49            | 19                        | 15                                       | 3UTR         |
| hsa-miR-11400 | NM_007268    | VSIG4      | 1640  | 1657  | 1            | 1    | 0.06           | 1.13            | 17                        | 13                                       | 3UTR         |
| hsa-miR-11400 | NM_001100431 | VSIG4      | 1358  | 1375  | 1            | 1    | 0.06           | 1.13            | 17                        | 13                                       | 3UTR         |
| hsa-miR-11400 | NM_022153    | VSIR       | 1412  | 1431  | 1            | 1    | 0.95           | 1.17            | 19                        | 15                                       | 3UTR         |

| mirnaid       | refseqid     | genesymbol | start | end  | binding<br>p | seed | phylopste<br>m | phylopflan<br>k | binding_region_lengt<br>h | longest_<br>consecut<br>ive_pairi<br>ngs | positio<br>n |
|---------------|--------------|------------|-------|------|--------------|------|----------------|-----------------|---------------------------|------------------------------------------|--------------|
| hsa-miR-11400 | NM_001253849 | VTCN1      | 2221  | 2236 | 1            | 1    | 2.12           | 2.23            | 15                        | 14                                       | 3UTR         |
| hsa-miR-11400 | NM_001253850 | VTCN1      | 1758  | 1773 | 1            | 1    | 0.81           | 1.67            | 15                        | 14                                       | 3UTR         |
| hsa-miR-11400 | NM_024626    | VTCN1      | 2106  | 2121 | 1            | 1    | 1.87           | 2.37            | 15                        | 14                                       | 3UTR         |
| hsa-miR-11400 | NM_006370    | VTI1B      | 1582  | 1600 | 1            | 1    | 0.29           | 0.18            | 18                        | 12                                       | 3UTR         |
| hsa-miR-11400 | NM_001039500 | VWA5B1     | 4274  | 4294 | 1            | 1    | -0.54          | -0.21           | 20                        | 9                                        | 3UTR         |
| hsa-miR-11400 | NM_198570    | VWC2       | 5463  | 5481 | 1            | 1    | -0.19          | -0.29           | 18                        | 7                                        | 3UTR         |
| hsa-miR-11400 | NM_182905    | WASHC1     | 1591  | 1607 | 1            | 1    | 2.44           | 3.25            | 16                        | 15                                       | 3UTR         |
| hsa-miR-11400 | NM_007187    | WBP4       | 1564  | 1593 | 1            | 1    | 1.95           | 0.93            | 20                        | 9                                        | 3UTR         |
| hsa-miR-11400 | NM_052950    | WDFY2      | 5907  | 5928 | 1            | 1    | 0.01           | -0.30           | 21                        | 9                                        | 3UTR         |
| hsa-miR-11400 | NM_001242414 | WDR20      | 878   | 907  | 1            | 1    | 0.15           | -0.08           | 29                        | 9                                        | 3UTR         |
| hsa-miR-11400 | NM_025160    | WDR26      | 4794  | 4816 | 1            | 1    | 4.59           | 6.05            | 22                        | 8                                        | 3UTR         |
| hsa-miR-11400 | NM_025160    | WDR26      | 3440  | 3456 | 1            | 1    | 1.59           | 1.47            | 16                        | 11                                       | 3UTR         |
| hsa-miR-11400 | NM_001379403 | WDR26      | 4794  | 4816 | 1            | 1    | 4.59           | 6.05            | 22                        | 8                                        | 3UTR         |
| hsa-miR-11400 | NM_001379403 | WDR26      | 3440  | 3456 | 1            | 1    | 1.59           | 1.47            | 16                        | 11                                       | 3UTR         |
| hsa-miR-11400 | NM_001006622 | WDR33      | 1739  | 1761 | 1            | 1    | 2.59           | 2.27            | 22                        | 11                                       | 3UTR         |
| hsa-miR-11400 | NM_172005    | WFDC13     | 615   | 634  | 1            | 1    | 0.17           | 0.33            | 19                        | 10                                       | 3UTR         |
| hsa-miR-11400 | NM_024911    | WLS        | 2439  | 2458 | 1            | 1    | 3.84           | 4.55            | 19                        | 11                                       | 3UTR         |

| mirnaid       | refseqid     | genesymbol | start | end  | binding<br>p | seed | phylopste<br>m | phylopflan<br>k | binding_region_lengt<br>h | longest_<br>consecut<br>ive_pairi<br>ngs | positio<br>n |
|---------------|--------------|------------|-------|------|--------------|------|----------------|-----------------|---------------------------|------------------------------------------|--------------|
| hsa-miR-11400 | NM_001193334 | WLS        | 2189  | 2208 | 1            | 1    | 6.24           | 2.75            | 19                        | 11                                       | 3UTR         |
| hsa-miR-11400 | NM_024494    | WNT2B      | 2556  | 2577 | 1            | 1    | 0.24           | 0.37            | 21                        | 11                                       | 3UTR         |
| hsa-miR-11400 | NM_030753    | WNT3       | 1232  | 1254 | 1            | 1    | -0.46          | 0.20            | 22                        | 8                                        | 3UTR         |
| hsa-miR-11400 | NM_030761    | WNT4       | 3692  | 3713 | 0.980769     | 1    | 5.04           | 2.11            | 21                        | 8                                        | 3UTR         |
| hsa-miR-11400 | NM_001256105 | WNT5A      | 4323  | 4344 |              | 1    | 2.53           | 1.61            | 21                        | 7                                        | 3UTR         |
| hsa-miR-11400 | NM_001256105 | WNT5A      | 2451  | 2469 |              | 1    | 0.59           | 0.33            | 18                        | 10                                       | 3UTR         |
| hsa-miR-11400 | NM_003392    | WNT5A      | 2710  | 2728 |              | 1    | 0.08           | 0.07            | 18                        | 10                                       | 3UTR         |
| hsa-miR-11400 | NM_003396    | WNT9B      | 2444  | 2466 | 1            | 1    | -0.57          | -0.14           | 20                        | 12                                       | 3UTR         |
| hsa-miR-11400 | NM_001320458 | WNT9B      | 2007  | 2055 | 1            | 1    | -0.12          | 0.03            | 23                        | 11                                       | 3UTR         |
| hsa-miR-11400 | NM_001270453 | WWP2       | 3444  | 3463 | 1            | 1    | -0.40          | -0.61           | 19                        | 18                                       | 3UTR         |
| hsa-miR-11400 | NM_001270454 | WWP2       | 3706  | 3725 | 1            | 1    | -0.40          | -0.61           | 19                        | 18                                       | 3UTR         |
| hsa-miR-11400 | NM_199424    | WWP2       | 2843  | 2862 | 1            | 1    | -0.40          | -0.61           | 19                        | 18                                       | 3UTR         |
| hsa-miR-11400 | NM_001024644 | XCR1       | 4238  | 4257 | 1            | 1    | 1.69           | 2.42            | 19                        | 9                                        | 3UTR         |
| hsa-miR-11400 | XM_011533097 | XPO1       | 3293  | 3309 | 1            | 1    | 0.00           | 0.00            | 16                        | 7                                        | 3UTR         |
| hsa-miR-11400 | NM_005431    | XRCC2      | 2729  | 2753 | 1            | 1    | 0.03           | 0.08            | 24                        | 9                                        | 3UTR         |
| hsa-miR-11400 | XM_017005750 | XXYLT1     | 6240  | 6259 | 1            | 1    | 0.00           | 0.00            | 19                        | 10                                       | 3UTR         |
| hsa-miR-11400 | NM_001190980 | YAF2       | 517   | 537  | 1            | 1    | -1.27          | 0.22            | 20                        | 6                                        | 3UTR         |

| mirnaid       | refseqid     | genesymbol | start | end  | binding<br>p | seed | phylopste<br>m | phylopflan<br>k | binding_region_lengt<br>h | longest_<br>consecut<br>ive_pairi<br>ngs | positio<br>n |
|---------------|--------------|------------|-------|------|--------------|------|----------------|-----------------|---------------------------|------------------------------------------|--------------|
| hsa-miR-11400 | NM_006555    | YKT6       | 1374  | 1391 | 1            | 1    | -0.52          | -0.52           | 17                        | 11                                       | 3UTR         |
| hsa-miR-11400 | NM_001363678 | YKT6       | 1272  | 1289 | 1            | 1    | -0.52          | -0.52           | 17                        | 11                                       | 3UTR         |
| hsa-miR-11400 | XM_017024621 | YPEL2      | 3238  | 3271 | 1            | 1    | 0.00           | 0.00            | 24                        | 9                                        | 3UTR         |
| hsa-miR-11400 | XM_017024621 | YPEL2      | 2355  | 2374 | 1            | 1    | 0.00           | 0.00            | 19                        | 6                                        | 3UTR         |
| hsa-miR-11400 | NM_001005404 | YPEL2      | 3257  | 3290 | 1            | 1    | 0.00           | 0.00            | 24                        | 9                                        | 3UTR         |
| hsa-miR-11400 | NM_133370    | YTHDC1     | 3421  | 3437 | 1            | 1    | 3.02           | 1.65            | 16                        | 15                                       | 3UTR         |
| hsa-miR-11400 | NM_001330698 | YTHDC1     | 3499  | 3515 | 1            | 1    | 1.44           | 2.12            | 16                        | 15                                       | 3UTR         |
| hsa-miR-11400 | NM_001031732 | YTHDC1     | 3475  | 3491 | 1            | 1    | 1.84           | 2.02            | 16                        | 15                                       | 3UTR         |
| hsa-miR-11400 | NM_012479    | YWHAG      | 1855  | 1886 | 1            | 1    | 1.14           | 1.95            | 21                        | 7                                        | 3UTR         |
| hsa-miR-11400 | NM_014838    | ZBED4      | 4654  | 4675 | 1            | 1    | 0.83           | 0.59            | 21                        | 9                                        | 3UTR         |
| hsa-miR-11400 | XM_017021095 | ZBTB1      | 3686  | 3704 | 1            | 1    | 0.00           | 0.00            | 18                        | 9                                        | 3UTR         |
| hsa-miR-11400 | NM_006006    | ZBTB16     | 6246  | 6264 | 1            | 1    | 0.14           | -0.18           | 18                        | 9                                        | 3UTR         |
| hsa-miR-11400 | NM_001018011 | ZBTB16     | 6152  | 6170 | 1            | 1    | 0.14           | -0.18           | 18                        | 9                                        | 3UTR         |
| hsa-miR-11400 | NM_205768    | ZBTB18     | 3160  | 3180 | 1            | 1    | 3.38           | 2.83            | 20                        | 7                                        | 3UTR         |
| hsa-miR-11400 | NM_001098402 | ZBTB21     | 6438  | 6458 | 1            | 1    | 1.47           | 1.48            | 20                        | 12                                       | 3UTR         |
| hsa-miR-11400 | NM_001098403 | ZBTB21     | 5835  | 5855 | 1            | 1    | 1.47           | 1.48            | 20                        | 12                                       | 3UTR         |
| hsa-miR-11400 | NM_001376164 | ZBTB38     | 4897  | 4913 | 1            | 1    | 0.89           | 0.21            | 16                        | 8                                        | 3UTR         |



| mirnaid       | refseqid     | genesymbol | start | end  | binding<br>p | seed | phylopste<br>m | phylopflan<br>k | binding_region_lengt<br>h | longest_<br>consecut<br>ive_pairi<br>ngs | positio<br>n |
|---------------|--------------|------------|-------|------|--------------|------|----------------|-----------------|---------------------------|------------------------------------------|--------------|
| hsa-miR-11400 | NM_001376166 | ZBTB38     | 4904  | 4920 | 1            | 1    | 0.89           | 0.21            | 16                        | 8                                        | 3UTR         |
| hsa-miR-11400 | NM_001376179 | ZBTB38     | 5175  | 5191 | 1            | 1    | 0.89           | 0.21            | 16                        | 8                                        | 3UTR         |
| hsa-miR-11400 | NM_014870    | ZBTB40     | 7934  | 7951 | 0.961538     | 1    | 0.23           | 0.28            | 17                        | 13                                       | 3UTR         |
| hsa-miR-11400 | NM_001330398 | ZBTB40     | 7598  | 7615 | 0.961538     | 1    | 0.23           | 0.28            | 17                        | 13                                       | 3UTR         |
| hsa-miR-11400 | NM_001083621 | ZBTB40     | 8222  | 8239 | 0.961538     | 1    | 0.23           | 0.28            | 17                        | 13                                       | 3UTR         |
| hsa-miR-11400 | NM_014007    | ZBTB43     | 1706  | 1726 | 1            | 1    | 3.02           | 2.26            | 20                        | 8                                        | 3UTR         |
| hsa-miR-11400 | XM_005260198 | ZBTB46     | 3411  | 3429 | 0.991453     | 1    | 0.00           | 0.00            | 18                        | 8                                        | 3UTR         |
| hsa-miR-11400 | NM_152735    | ZBTB9      | 2603  | 2621 | 1            | 1    | 0.04           | 0.11            | 18                        | 6                                        | 3UTR         |
| hsa-miR-11400 | NM_001010888 | ZC3H12B    | 6704  | 6726 | 1            | 1    | 0.00           | 0.00            | 22                        | 10                                       | 3UTR         |
| hsa-miR-11400 | NM_207660    | ZC3H14     | 9308  | 9327 | 1            | 1    | -0.12          | -0.13           | 19                        | 10                                       | 3UTR         |
| hsa-miR-11400 | NM_207661    | ZC3H14     | 9362  | 9381 | 1            | 1    | 0.00           | 0.00            | 19                        | 10                                       | 3UTR         |
| hsa-miR-11400 | NM_207661    | ZC3H14     | 6947  | 6964 | 1            | 1    | 0.00           | 0.00            | 17                        | 16                                       | 3UTR         |
| hsa-miR-11400 | NM_207662    | ZC3H14     | 8699  | 8718 | 1            | 1    | -0.12          | -0.13           | 19                        | 10                                       | 3UTR         |
| hsa-miR-11400 | NM_024824    | ZC3H14     | 9779  | 9798 | 1            | 1    | -0.12          | -0.13           | 19                        | 10                                       | 3UTR         |
| hsa-miR-11400 | NM_001326295 | ZC3H14     | 9386  | 9405 | 1            | 1    | -0.12          | -0.13           | 19                        | 10                                       | 3UTR         |
| hsa-miR-11400 | NM_001326307 | ZC3H14     | 9704  | 9723 | 1            | 1    | -0.12          | -0.13           | 19                        | 10                                       | 3UTR         |
| hsa-miR-11400 | NM_001326311 | ZC3H14     | 9193  | 9212 | 1            | 1    | -0.12          | -0.13           | 19                        | 10                                       | 3UTR         |

| mirnaid       | refseqid     | genesymbol | start | end   | binding<br>p | seed | phylopste<br>m | phylopflan<br>k | binding_region_lengt<br>h | longest_<br>consecut<br>ive_pairi<br>ngs | positio<br>n |
|---------------|--------------|------------|-------|-------|--------------|------|----------------|-----------------|---------------------------|------------------------------------------|--------------|
| hsa-miR-11400 | NM_001160104 | ZC3H14     | 9761  | 9780  | 1            | 1    | -0.12          | -0.13           | 19                        | 10                                       | 3UTR         |
| hsa-miR-11400 | NM_001294340 | ZC3H18     | 3145  | 3165  | 1            | 1    | 1.96           | 2.22            | 20                        | 8                                        | 3UTR         |
| hsa-miR-11400 | NM_144604    | ZC3H18     | 3073  | 3093  | 1            | 1    | 1.96           | 2.22            | 20                        | 8                                        | 3UTR         |
| hsa-miR-11400 | XM_017026531 | ZC3H4      | 5280  | 5298  | 1            | 1    | 0.00           | 0.00            | 18                        | 9                                        | 3UTR         |
| hsa-miR-11400 | NM_015168    | ZC3H4      | 5523  | 5541  | 1            | 1    | 3.34           | 2.89            | 18                        | 9                                        | 3UTR         |
| hsa-miR-11400 | NM_198581    | ZC3H6      | 11335 | 11365 | 1            | 1    | 0.49           | 0.22            | 30                        | 10                                       | 3UTR         |
| hsa-miR-11400 | NM_018684    | ZC4H2      | 2597  | 2618  | 1            | 1    | 4.49           | 4.20            | 21                        | 10                                       | 3UTR         |
| hsa-miR-11400 | NM_001178032 | ZC4H2      | 2839  | 2860  | 1            | 1    | 0.05           | 0.12            | 21                        | 10                                       | 3UTR         |
| hsa-miR-11400 | NM_001178033 | ZC4H2      | 2434  | 2455  | 1            | 1    | 4.53           | 4.61            | 21                        | 10                                       | 3UTR         |
| hsa-miR-11400 | NM_001300817 | ZCCHC10    | 1600  | 1622  | 0.961538     | 1    | 3.21           | 1.47            | 22                        | 12                                       | 3UTR         |
| hsa-miR-11400 | NM_001300819 | ZCCHC10    | 1510  | 1532  | 0.961538     | 1    | 0.49           | 0.95            | 22                        | 12                                       | 3UTR         |
| hsa-miR-11400 | NM_001300822 | ZCCHC10    | 1646  | 1668  | 0.961538     | 1    | 2.80           | 3.28            | 22                        | 12                                       | 3UTR         |
| hsa-miR-11400 | NM_001308130 | ZCCHC10    | 1580  | 1602  | 0.961538     | 1    | 0.75           | 1.89            | 22                        | 12                                       | 3UTR         |
| hsa-miR-11400 | NM_017665    | ZCCHC10    | 1552  | 1574  | 0.961538     | 1    | 0.04           | 1.35            | 22                        | 12                                       | 3UTR         |
| hsa-miR-11400 | XM_017005759 | ZCWPW2     | 4458  | 4483  | 1            | 1    | 0.00           | 0.00            | 25                        | 12                                       | 3UTR         |
| hsa-miR-11400 | NM_001330059 | ZDHHC20    | 2018  | 2050  | 1            | 1    | 0.28           | 0.13            | 23                        | 9                                        | 3UTR         |
| hsa-miR-11400 | NM_174976    | ZDHHC22    | 2064  | 2083  | 1            | 1    | 0.53           | -0.01           | 19                        | 7                                        | 3UTR         |

| mirnaid       | refseqid     | genesymbol | start | end   | binding<br>p | seed | phylopste<br>m | phylopflan<br>k | binding_region_lengt<br>h | longest_<br>consecut<br>ive_pairi<br>ngs | positio<br>n |
|---------------|--------------|------------|-------|-------|--------------|------|----------------|-----------------|---------------------------|------------------------------------------|--------------|
| hsa-miR-11400 | NM_001349377 | ZDHHC3     | 3477  | 3498  | 1            | 1    | 0.00           | 0.00            | 21                        | 11                                       | 3UTR         |
| hsa-miR-11400 | NM_001135179 | ZDHHC3     | 12181 | 12202 | 1            | 1    | 0.00           | 0.00            | 21                        | 11                                       | 3UTR         |
| hsa-miR-11400 | NM_001135179 | ZDHHC3     | 5973  | 6006  | 1            | 1    | 0.00           | 0.00            | 33                        | 8                                        | 3UTR         |
| hsa-miR-11400 | XM_017016564 | ZDHHC6     | 2060  | 2103  | 1            | 1    | 0.00           | 0.00            | 43                        | 10                                       | 3UTR         |
| hsa-miR-11400 | NM_006336    | ZER1       | 4029  | 4050  | 1            | 1    | 0.35           | 0.43            | 21                        | 8                                        | 3UTR         |
| hsa-miR-11400 | NM_001278243 | ZFAND5     | 939   | 964   | 1            | 1    | 0.01           | 0.12            | 19                        | 12                                       | 3UTR         |
| hsa-miR-11400 | NM_020917    | ZFP14      | 3659  | 3677  | 1            | 1    | -0.01          | -0.11           | 18                        | 17                                       | 3UTR         |
| hsa-miR-11400 | NM_153018    | ZFP3       | 2530  | 2555  | 1            | 1    | -0.26          | -0.01           | 24                        | 9                                        | 3UTR         |
| hsa-miR-11400 | NM_053023    | ZFP91      | 2907  | 2933  | 1            | 1    | 0.96           | 1.53            | 26                        | 9                                        | 3UTR         |
| hsa-miR-11400 | NM_001369702 | ZFY        | 4587  | 4605  | 1            | 1    | 2.40           | 2.59            | 18                        | 9                                        | 3UTR         |
| hsa-miR-11400 | NM_001145276 | ZFY        | 4014  | 4032  | 1            | 1    | 2.40           | 2.59            | 18                        | 9                                        | 3UTR         |
| hsa-miR-11400 | NM_001284236 | ZFYVE16    | 8160  | 8179  | 1            | 1    | -0.07          | 0.01            | 19                        | 9                                        | 3UTR         |
| hsa-miR-11400 | NM_014733    | ZFYVE16    | 8106  | 8125  | 1            | 1    | -0.07          | 0.01            | 19                        | 9                                        | 3UTR         |
| hsa-miR-11400 | NM_001105251 | ZFYVE16    | 8234  | 8253  | 1            | 1    | -0.07          | 0.01            | 19                        | 9                                        | 3UTR         |
| hsa-miR-11400 | NM_152338    | ZG16       | 1846  | 1894  | 1            | 1    | 0.08           | 0.01            | 48                        | 8                                        | 3UTR         |
| hsa-miR-11400 | NM_024645    | ZMAT4      | 2142  | 2161  | 1            | 1    | 5.48           | 4.51            | 19                        | 9                                        | 3UTR         |
| hsa-miR-11400 | NM_001135731 | ZMAT4      | 1914  | 1933  | 1            | 1    | 5.48           | 4.51            | 19                        | 9                                        | 3UTR         |

| mirnaid       | refseqid    | genesymbol | start | end  | binding<br>p | seed | phylopste<br>m | phylopflan<br>k | binding_region_lengt<br>h | longest_<br>consecut<br>ive_pairi<br>ngs | positio<br>n |
|---------------|-------------|------------|-------|------|--------------|------|----------------|-----------------|---------------------------|------------------------------------------|--------------|
| hsa-miR-11400 | NM_00128908 | ZMYM1      | 3949  | 3972 | 1            | 1    | -0.04          | 0.10            | 23                        | 8                                        | 3UTR         |
| hsa-miR-11400 | NM_00128909 | ZMYM1      | 3689  | 3712 | 1            | 1    | 0.06           | 0.10            | 23                        | 8                                        | 3UTR         |
| hsa-miR-11400 | XM_01154216 | ZMYM1      | 4021  | 4044 | 1            | 1    | 0.00           | 0.00            | 23                        | 8                                        | 3UTR         |
| hsa-miR-11400 | NM_024772   | ZMYM1      | 3641  | 3664 | 1            | 1    | -0.04          | 0.10            | 23                        | 8                                        | 3UTR         |
| hsa-miR-11400 | NM_00131995 | ZMYM1      | 3471  | 3494 | 1            | 1    | 0.06           | 0.10            | 23                        | 8                                        | 3UTR         |
| hsa-miR-11400 | NM_00100872 | ZNF121     | 4841  | 4859 | 1            | 1    | 0.04           | 0.00            | 18                        | 14                                       | 3UTR         |
| hsa-miR-11400 | NM_007147   | ZNF175     | 3833  | 3851 | 1            | 1    | 0.18           | 0.04            | 18                        | 8                                        | 3UTR         |
| hsa-miR-11400 | NM_007150   | ZNF185     | 3369  | 3390 | 1            | 1    | 0.00           | 0.00            | 21                        | 7                                        | 3UTR         |
| hsa-miR-11400 | NM_00117810 | ZNF185     | 3465  | 3486 | 1            | 1    | 0.00           | 0.00            | 21                        | 7                                        | 3UTR         |
| hsa-miR-11400 | NM_00117810 | ZNF185     | 3378  | 3399 | 1            | 1    | 0.00           | 0.00            | 21                        | 7                                        | 3UTR         |
| hsa-miR-11400 | NM_00117810 | ZNF185     | 3372  | 3393 | 1            | 1    | 0.00           | 0.00            | 21                        | 7                                        | 3UTR         |
| hsa-miR-11400 | NM_00117811 | ZNF185     | 3192  | 3213 | 1            | 1    | 0.00           | 0.00            | 21                        | 7                                        | 3UTR         |
| hsa-miR-11400 | NM_00117811 | ZNF185     | 2944  | 2965 | 1            | 1    | 0.07           | -0.07           | 21                        | 7                                        | 3UTR         |
| hsa-miR-11400 | NM_00117811 | ZNF185     | 2273  | 2294 | 1            | 1    | 0.06           | -0.13           | 21                        | 7                                        | 3UTR         |
| hsa-miR-11400 | NM_00109850 | ZNF207     | 6116  | 6138 | 1            | 1    | -0.45          | -0.21           | 22                        | 12                                       | 3UTR         |
| hsa-miR-11400 | NM_00132997 | ZNF208     | 704   | 721  | 0.974359     | 1    | -0.11          | -0.13           | 17                        | 8                                        | 3UTR         |
| hsa-miR-11400 | NM_00126759 | ZNF248     | 4481  | 4500 | 1            | 1    | 1.85           | 1.34            | 19                        | 11                                       | 3UTR         |

| mirnaid       | refseqid     | genesymbol | start | end  | binding<br>p | seed | phylopste<br>m | phylopflan<br>k | binding_region_lengt<br>h | longest_<br>consecut<br>ive_pairi<br>ngs | positio<br>n |
|---------------|--------------|------------|-------|------|--------------|------|----------------|-----------------|---------------------------|------------------------------------------|--------------|
| hsa-miR-11400 | NM_001267605 | ZNF248     | 3096  | 3115 | 1            | 1    | -0.07          | 0.06            | 19                        | 11                                       | 3UTR         |
| hsa-miR-11400 | NM_001267606 | ZNF248     | 3297  | 3319 | 1            | 1    | -0.07          | 0.18            | 22                        | 8                                        | 3UTR         |
| hsa-miR-11400 | NM_001267606 | ZNF248     | 3845  | 3864 | 1            | 1    | -0.07          | 0.06            | 19                        | 11                                       | 3UTR         |
| hsa-miR-11400 | NM_021045    | ZNF248     | 4808  | 4827 | 1            | 1    | -0.07          | 0.06            | 19                        | 11                                       | 3UTR         |
| hsa-miR-11400 | NM_001352478 | ZNF248     | 2769  | 2788 | 1            | 1    | 1.85           | 1.34            | 19                        | 11                                       | 3UTR         |
| hsa-miR-11400 | NM_145011    | ZNF25      | 1654  | 1677 | 1            | 1    | -0.23          | -0.07           | 23                        | 9                                        | 3UTR         |
| hsa-miR-11400 | XM_017023889 | ZNF276     | 2539  | 2562 | 1            | 1    | 0.00           | 0.00            | 23                        | 8                                        | 3UTR         |
| hsa-miR-11400 | XM_017023889 | ZNF276     | 2376  | 2398 | 1            | 1    | 0.00           | 0.00            | 22                        | 10                                       | 3UTR         |
| hsa-miR-11400 | NM_001351777 | ZNF320     | 4669  | 4689 | 1            | 1    | 0.31           | 0.23            | 20                        | 7                                        | 3UTR         |
| hsa-miR-11400 | NM_001351777 | ZNF320     | 678   | 706  | 1            | 1    | 0.09           | -0.32           | 17                        | 12                                       | 3UTR         |
| hsa-miR-11400 | NM_001253800 | ZNF331     | 3487  | 3508 | 1            | 1    | 0.01           | -0.04           | 21                        | 9                                        | 3UTR         |
| hsa-miR-11400 | NM_001253801 | ZNF331     | 3450  | 3471 | 1            | 1    | 0.01           | -0.04           | 21                        | 9                                        | 3UTR         |
| hsa-miR-11400 | NM_001317113 | ZNF331     | 3410  | 3431 | 1            | 1    | 0.01           | -0.04           | 21                        | 9                                        | 3UTR         |
| hsa-miR-11400 | NM_001317116 | ZNF331     | 3317  | 3338 | 1            | 1    | 0.01           | -0.04           | 21                        | 9                                        | 3UTR         |
| hsa-miR-11400 | NM_001317119 | ZNF331     | 3530  | 3551 | 1            | 1    | 0.01           | -0.04           | 21                        | 9                                        | 3UTR         |
| hsa-miR-11400 | NM_001079906 | ZNF331     | 3474  | 3495 | 1            | 1    | 0.01           | -0.04           | 21                        | 9                                        | 3UTR         |
| hsa-miR-11400 | NM_001079907 | ZNF331     | 3560  | 3581 | 1            | 1    | 0.01           | -0.04           | 21                        | 9                                        | 3UTR         |

| mirnaid       | refseqid     | genesymbol | start | end  | binding<br>p | seed | phylopste<br>m | phylopflan<br>k | binding_region_lengt<br>h | longest_<br>consecut<br>ive_pairi<br>ngs | positio<br>n |
|---------------|--------------|------------|-------|------|--------------|------|----------------|-----------------|---------------------------|------------------------------------------|--------------|
| hsa-miR-11400 | NM_015655    | ZNF337     | 2593  | 2611 | 0.980769     | 1    | -2.98          | 0.49            | 18                        | 17                                       | 3UTR         |
| hsa-miR-11400 | NM_001290261 | ZNF337     | 2989  | 3007 | 1            | 1    | 1.05           | 0.26            | 18                        | 17                                       | 3UTR         |
| hsa-miR-11400 | NM_001172674 | ZNF347     | 6274  | 6299 | 1            | 1    | 0.00           | 0.00            | 25                        | 8                                        | 3UTR         |
| hsa-miR-11400 | NM_014951    | ZNF365     | 3332  | 3349 | 1            | 1    | 0.31           | 0.52            | 17                        | 16                                       | 3UTR         |
| hsa-miR-11400 | NM_021188    | ZNF410     | 1703  | 1720 | 1            | 1    | 0.58           | 0.63            | 17                        | 9                                        | 3UTR         |
| hsa-miR-11400 | NM_001242924 | ZNF410     | 1872  | 1889 | 1            | 1    | 0.58           | 0.63            | 17                        | 9                                        | 3UTR         |
| hsa-miR-11400 | NM_001242927 | ZNF410     | 1484  | 1501 | 1            | 1    | 0.58           | 0.63            | 17                        | 9                                        | 3UTR         |
| hsa-miR-11400 | NM_001242928 | ZNF410     | 1796  | 1813 | 1            | 1    | 0.58           | 0.63            | 17                        | 9                                        | 3UTR         |
| hsa-miR-11400 | NM_001146175 | ZNF414     | 1350  | 1373 | 1            | 1    | 0.68           | 1.44            | 23                        | 7                                        | 3UTR         |
| hsa-miR-11400 | NM_001300883 | ZNF426     | 6602  | 6624 | 1            | 1    | 0.89           | 0.07            | 22                        | 13                                       | 3UTR         |
| hsa-miR-11400 | NM_024106    | ZNF426     | 6465  | 6487 | 1            | 1    | -0.59          | -0.46           | 22                        | 13                                       | 3UTR         |
| hsa-miR-11400 | NM_014650    | ZNF432     | 2345  | 2365 | 1            | 1    | 0.29           | -0.07           | 20                        | 7                                        | 3UTR         |
| hsa-miR-11400 | NM_001322285 | ZNF432     | 2222  | 2242 | 1            | 1    | -0.02          | 0.11            | 20                        | 7                                        | 3UTR         |
| hsa-miR-11400 | NM_030634    | ZNF436     | 1866  | 1885 | 1            | 1    | 0.73           | 0.83            | 19                        | 8                                        | 3UTR         |
| hsa-miR-11400 | NM_152355    | ZNF441     | 3908  | 3947 | 1            | 1    | 0.31           | 0.08            | 39                        | 10                                       | 3UTR         |
| hsa-miR-11400 | NM_001297623 | ZNF461     | 2912  | 2943 | 1            | 1    | 0.94           | 0.21            | 22                        | 10                                       | 3UTR         |
| hsa-miR-11400 | NM_153257    | ZNF461     | 2981  | 3012 | 1            | 1    | 0.00           | -0.10           | 22                        | 10                                       | 3UTR         |

| mirnaid       | refseqid     | genesymbol | start | end  | binding<br>p | seed | phylopste<br>m | phylopflan<br>k | binding_region_lengt<br>h | longest_<br>consecut<br>ive_pairi<br>ngs | positio<br>n |
|---------------|--------------|------------|-------|------|--------------|------|----------------|-----------------|---------------------------|------------------------------------------|--------------|
| hsa-miR-11400 | NM_001308424 | ZNF473     | 2906  | 2931 | 1            | 1    | -0.48          | -0.31           | 25                        | 8                                        | 3UTR         |
| hsa-miR-11400 | NM_015428    | ZNF473     | 3106  | 3131 | 1            | 1    | -0.48          | -0.31           | 25                        | 8                                        | 3UTR         |
| hsa-miR-11400 | NM_001006656 | ZNF473     | 2984  | 3009 | 1            | 1    | -0.48          | -0.31           | 25                        | 8                                        | 3UTR         |
| hsa-miR-11400 | NM_001007169 | ZNF483     | 1517  | 1536 | 1            | 1    | -0.29          | -0.09           | 19                        | 10                                       | 3UTR         |
| hsa-miR-11400 | NM_001355444 | ZNF487     | 1326  | 1349 | 1            | 1    | 1.06           | -0.05           | 23                        | 8                                        | 3UTR         |
| hsa-miR-11400 | NM_001355445 | ZNF487     | 1262  | 1285 | 1            | 1    | 1.06           | -0.05           | 23                        | 8                                        | 3UTR         |
| hsa-miR-11400 | NM_153034    | ZNF488     | 1442  | 1461 | 0.953846     | 1    | -0.46          | -0.27           | 19                        | 13                                       | 3UTR         |
| hsa-miR-11400 | NM_001314059 | ZNF510     | 4215  | 4232 | 1            | 1    | -0.40          | -0.17           | 17                        | 12                                       | 3UTR         |
| hsa-miR-11400 | NM_001314059 | ZNF510     | 2778  | 2796 | 1            | 1    | 0.12           | 0.05            | 18                        | 12                                       | 3UTR         |
| hsa-miR-11400 | NM_014930    | ZNF510     | 3763  | 3780 | 1            | 1    | -0.43          | -0.23           | 17                        | 12                                       | 3UTR         |
| hsa-miR-11400 | NM_001297763 | ZNF546     | 5638  | 5669 | 1            | 1    | -0.26          | 0.10            | 19                        | 14                                       | 3UTR         |
| hsa-miR-11400 | NM_178544    | ZNF546     | 5716  | 5747 | 1            | 1    | -0.26          | 0.10            | 19                        | 14                                       | 3UTR         |
| hsa-miR-11400 | NM_001277090 | ZNF550     | 1967  | 1985 | 1            | 1    | 0.02           | -0.59           | 18                        | 15                                       | 3UTR         |
| hsa-miR-11400 | NM_001277091 | ZNF550     | 1967  | 1985 | 1            | 1    | 0.12           | -0.70           | 18                        | 15                                       | 3UTR         |
| hsa-miR-11400 | NM_024762    | ZNF552     | 1723  | 1748 | 1            | 1    | -1.83          | -0.57           | 25                        | 8                                        | 3UTR         |
| hsa-miR-11400 | NM_152791    | ZNF555     | 6827  | 6847 | 1            | 1    | -0.14          | -0.62           | 20                        | 7                                        | 3UTR         |
| hsa-miR-11400 | NM_001172775 | ZNF555     | 6824  | 6844 | 1            | 1    | -0.14          | -0.62           | 20                        | 7                                        | 3UTR         |

| mirnaid       | refseqid     | genesymbol | start | end  | binding<br>p | seed | phylopste<br>m | phylopflan<br>k | binding_region_lengt<br>h | longest_<br>consecut<br>ive_pairi<br>ngs | positio<br>n |
|---------------|--------------|------------|-------|------|--------------|------|----------------|-----------------|---------------------------|------------------------------------------|--------------|
| hsa-miR-11400 | NM_032838    | ZNF566     | 2878  | 2894 | 1            | 1    | 0.13           | 0.40            | 16                        | 12                                       | 3UTR         |
| hsa-miR-11400 | XM_006723447 | ZNF566     | 3287  | 3303 | 1            | 1    | 0.00           | 0.00            | 16                        | 12                                       | 3UTR         |
| hsa-miR-11400 | XM_011527428 | ZNF566     | 3049  | 3065 | 1            | 1    | 0.00           | 0.00            | 16                        | 12                                       | 3UTR         |
| hsa-miR-11400 | NM_001145345 | ZNF566     | 2943  | 2959 | 1            | 1    | 0.25           | 0.22            | 16                        | 12                                       | 3UTR         |
| hsa-miR-11400 | NM_001159860 | ZNF583     | 2516  | 2538 | 1            | 1    | 0.00           | 0.00            | 17                        | 9                                        | 3UTR         |
| hsa-miR-11400 | NM_001288800 | ZNF585A    | 5060  | 5082 | 1            | 1    | -0.28          | 0.00            | 22                        | 8                                        | 3UTR         |
| hsa-miR-11400 | NM_152279    | ZNF585B    | 5693  | 5709 | 1            | 1    | -0.44          | 0.17            | 16                        | 10                                       | 3UTR         |
| hsa-miR-11400 | NM_001204814 | ZNF586     | 2037  | 2058 | 1            | 1    | 3.65           | 1.97            | 21                        | 12                                       | 3UTR         |
| hsa-miR-11400 | NM_178167    | ZNF598     | 3070  | 3088 | 1            | 1    | 2.08           | 2.53            | 18                        | 15                                       | 3UTR         |
| hsa-miR-11400 | NM_015042    | ZNF609     | 5712  | 5733 | 1            | 1    | 0.24           | 0.77            | 21                        | 10                                       | 3UTR         |
| hsa-miR-11400 | NM_001287245 | ZNF621     | 966   | 991  | 1            | 1    | 0.11           | -0.06           | 25                        | 8                                        | 3UTR         |
| hsa-miR-11400 | NM_198484    | ZNF621     | 5076  | 5110 | 1            | 1    | -0.02          | 0.05            | 34                        | 10                                       | 3UTR         |
| hsa-miR-11400 | NM_198484    | ZNF621     | 7045  | 7070 | 1            | 1    | 0.18           | 0.02            | 25                        | 8                                        | 3UTR         |
| hsa-miR-11400 | NM_198484    | ZNF621     | 2320  | 2339 | 1            | 1    | 0.46           | 0.07            | 19                        | 11                                       | 3UTR         |
| hsa-miR-11400 | NM_001098414 | ZNF621     | 4840  | 4874 | 1            | 1    | -0.02          | 0.05            | 34                        | 10                                       | 3UTR         |
| hsa-miR-11400 | NM_001098414 | ZNF621     | 6809  | 6834 | 1            | 1    | 0.18           | 0.02            | 25                        | 8                                        | 3UTR         |
| hsa-miR-11400 | NM_001098414 | ZNF621     | 2084  | 2103 | 1            | 1    | 0.46           | 0.07            | 19                        | 11                                       | 3UTR         |



| mirnaid       | refseqid     | genesymbol | start | end   | binding<br>p | seed | phylopste<br>m | phylopflan<br>k | binding_region_lengt<br>h | longest_<br>consecut<br>ive_pairi<br>ngs | positio<br>n |
|---------------|--------------|------------|-------|-------|--------------|------|----------------|-----------------|---------------------------|------------------------------------------|--------------|
| hsa-miR-11400 | NM_001080417 | ZNF629     | 4706  | 4725  | 1            | 1    | 0.15           | 1.35            | 19                        | 13                                       | 3UTR         |
| hsa-miR-11400 | NM_138494    | ZNF655     | 3277  | 3328  | 1            | 1    | 0.97           | 0.29            | 26                        | 9                                        | 3UTR         |
| hsa-miR-11400 | NM_001009960 | ZNF655     | 3324  | 3375  | 1            | 1    | 0.97           | 0.29            | 26                        | 9                                        | 3UTR         |
| hsa-miR-11400 | NM_001083956 | ZNF655     | 3382  | 3433  | 1            | 1    | 0.55           | 0.25            | 26                        | 9                                        | 3UTR         |
| hsa-miR-11400 | NM_001085368 | ZNF655     | 3429  | 3480  | 1            | 1    | 0.97           | 0.29            | 26                        | 9                                        | 3UTR         |
| hsa-miR-11400 | NM_001355197 | ZNF66      | 4230  | 4260  | 1            | 1    | 0.14           | -0.08           | 30                        | 11                                       | 3UTR         |
| hsa-miR-11400 | NM_138447    | ZNF689     | 2991  | 3012  | 1            | 1    | 0.70           | 1.06            | 21                        | 8                                        | 3UTR         |
| hsa-miR-11400 | XM_011527092 | ZNF701     | 4951  | 4972  | 1            | 1    | 0.00           | 0.00            | 21                        | 8                                        | 3UTR         |
| hsa-miR-11400 | XM_011527092 | ZNF701     | 4200  | 4236  | 1            | 1    | 0.00           | 0.00            | 36                        | 8                                        | 3UTR         |
| hsa-miR-11400 | XM_011527092 | ZNF701     | 3066  | 3100  | 1            | 1    | 0.00           | 0.00            | 34                        | 8                                        | 3UTR         |
| hsa-miR-11400 | NM_018260    | ZNF701     | 4863  | 4884  | 1            | 1    | -0.16          | 0.17            | 21                        | 8                                        | 3UTR         |
| hsa-miR-11400 | NM_001172655 | ZNF701     | 5171  | 5192  | 1            | 1    | -0.16          | 0.17            | 21                        | 8                                        | 3UTR         |
| hsa-miR-11400 | NM_001033723 | ZNF704     | 11553 | 11599 | 1            | 1    | 0.14           | 0.04            | 21                        | 14                                       | 3UTR         |
| hsa-miR-11400 | NM_001164457 | ZNF705G    | 2848  | 2876  | 1            | 1    | 1.43           | -0.11           | 23                        | 9                                        | 3UTR         |
| hsa-miR-11400 | NM_001159279 | ZNF716     | 4890  | 4906  | 1            | 1    | -0.32          | -0.06           | 16                        | 8                                        | 3UTR         |
| hsa-miR-11400 | NM_001159522 | ZNF727     | 4361  | 4379  | 1            | 1    | -0.14          | 0.03            | 18                        | 14                                       | 3UTR         |
| hsa-miR-11400 | NM_001159293 | ZNF737     | 4024  | 4045  | 1            | 1    | 0.36           | 0.29            | 21                        | 14                                       | 3UTR         |

| mirnaid       | refseqid     | genesymbol | start | end  | binding<br>p | seed | phylopste<br>m | phylopflan<br>k | binding_region_lengt<br>h | longest_<br>consecut<br>ive_pairi<br>ngs | positio<br>n |
|---------------|--------------|------------|-------|------|--------------|------|----------------|-----------------|---------------------------|------------------------------------------|--------------|
| hsa-miR-11400 | NM_001004304 | ZNF740     | 6746  | 6783 | 1            | 1    | 1.24           | 0.90            | 20                        | 18                                       | 3UTR         |
| hsa-miR-11400 | NM_001004304 | ZNF740     | 6764  | 6783 | 1            | 1    | 3.24           | 0.84            | 19                        | 18                                       | 3UTR         |
| hsa-miR-11400 | NM_007131    | ZNF75D     | 5256  | 5275 | 1            | 1    | -0.60          | -0.63           | 19                        | 13                                       | 3UTR         |
| hsa-miR-11400 | NM_001185063 | ZNF75D     | 2629  | 2648 | 1            | 1    | 0.00           | 0.00            | 19                        | 13                                       | 3UTR         |
| hsa-miR-11400 | NM_001304335 | ZNF773     | 4914  | 4969 | 1            | 1    | 0.11           | 0.03            | 18                        | 12                                       | 3UTR         |
| hsa-miR-11400 | NM_001304337 | ZNF773     | 4869  | 4924 | 1            | 1    | 0.11           | 0.03            | 18                        | 12                                       | 3UTR         |
| hsa-miR-11400 | XM_017023015 | ZNF778     | 2681  | 2697 | 0.953846     | 1    | 0.00           | 0.00            | 16                        | 10                                       | 3UTR         |
| hsa-miR-11400 | NM_001142579 | ZNF780A    | 1361  | 1387 | 1            | 1    | 0.00           | 0.00            | 26                        | 11                                       | 3UTR         |
| hsa-miR-11400 | NM_001001662 | ZNF782     | 3643  | 3678 | 1            | 1    | 1.19           | 1.29            | 35                        | 12                                       | 3UTR         |
| hsa-miR-11400 | NM_001195220 | ZNF783     | 2056  | 2074 | 1            | 1    | -0.02          | -0.47           | 18                        | 17                                       | 3UTR         |
| hsa-miR-11400 | NM_153358    | ZNF791     | 6097  | 6114 | 1            | 1    | -0.46          | 0.05            | 17                        | 9                                        | 3UTR         |
| hsa-miR-11400 | NM_001355461 | ZNF806     | 560   | 596  | 1            | 1    | -0.01          | 0.01            | 36                        | 8                                        | 3UTR         |
| hsa-miR-11400 | XM_011543900 | ZNF81      | 2539  | 2561 | 0.961538     | 1    | 0.00           | 0.00            | 22                        | 9                                        | 3UTR         |
| hsa-miR-11400 | NM_007137    | ZNF81      | 2420  | 2442 | 0.961538     | 1    | -0.12          | 0.14            | 22                        | 9                                        | 3UTR         |
| hsa-miR-11400 | NM_007137    | ZNF81      | 9437  | 9470 | 0.980769     | 1    | 0.49           | 0.22            | 20                        | 13                                       | 3UTR         |
| hsa-miR-11400 | NM_001037232 | ZNF829     | 3735  | 3758 | 1            | 1    | 0.84           | 0.73            | 23                        | 9                                        | 3UTR         |
| hsa-miR-11400 | NM_001171979 | ZNF829     | 3698  | 3721 | 1            | 1    | 1.06           | -0.34           | 23                        | 9                                        | 3UTR         |

| mirnaid       | refseqid     | genesymbol | start | end  | binding<br>p | seed | phylopste<br>m | phylopflan<br>k | binding_region_lengt<br>h | longest_<br>consecut<br>ive_pairi<br>ngs | positio<br>n |
|---------------|--------------|------------|-------|------|--------------|------|----------------|-----------------|---------------------------|------------------------------------------|--------------|
| hsa-miR-11400 | NM_021035    | ZNFX1      | 6702  | 6720 | 1            | 1    | 1.89           | 1.87            | 18                        | 9                                        | 3UTR         |
| hsa-miR-11400 | NM_017953    | ZNHIT6     | 4089  | 4110 | 1            | 1    | -0.29          | -0.10           | 21                        | 8                                        | 3UTR         |
| hsa-miR-11400 | NM_001170670 | ZNHIT6     | 3972  | 3993 | 1            | 1    | 0.03           | 0.12            | 21                        | 8                                        | 3UTR         |
| hsa-miR-11400 | NM_147128    | ZNRF2      | 1580  | 1600 | 1            | 1    | 1.07           | 1.60            | 20                        | 8                                        | 3UTR         |
| hsa-miR-11400 | NM_147128    | ZNRF2      | 1627  | 1672 | 1            | 1    | 1.65           | 0.92            | 45                        | 11                                       | 3UTR         |
| hsa-miR-11400 | NM_001286568 | ZRANB3     | 4231  | 4280 | 0.974359     | 1    | 3.31           | 2.99            | 26                        | 8                                        | 3UTR         |
| hsa-miR-11400 | NM_001286569 | ZRANB3     | 5829  | 5860 | 1            | 1    | 3.44           | 3.10            | 31                        | 8                                        | 3UTR         |
| hsa-miR-11400 | XM_017011528 | ZSCAN12    | 2017  | 2054 | 1            | 1    | 0.00           | 0.00            | 19                        | 7                                        | 3UTR         |
| hsa-miR-11400 | NM_001287821 | ZWILCH     | 2097  | 2122 | 1            | 1    | 3.52           | 2.91            | 25                        | 10                                       | 3UTR         |
| hsa-miR-11400 | NM_001287822 | ZWILCH     | 2001  | 2026 | 1            | 1    | 2.17           | 1.35            | 25                        | 10                                       | 3UTR         |
| hsa-miR-11400 | NM_001287823 | ZWILCH     | 1950  | 1975 | 1            | 1    | 3.52           | 2.91            | 25                        | 10                                       | 3UTR         |
| hsa-miR-11400 | NM_017975    | ZWILCH     | 2002  | 2027 | 1            | 1    | 3.52           | 2.91            | 25                        | 10                                       | 3UTR         |

**Supplementary Table S8.** KEGG pathway enrichment analysis for miR-11400 predicted target genes.

| nG<br>ene<br>s <sup>a</sup> | Enrich<br>ment<br>FDR <sup>b</sup> | Pathw<br>ay<br>Genes | Fold<br>Enrichment <sup>c</sup> | Pathway                                   | Genes                                                                                                                                                                                             |
|-----------------------------|------------------------------------|----------------------|---------------------------------|-------------------------------------------|---------------------------------------------------------------------------------------------------------------------------------------------------------------------------------------------------|
| 33                          | 0.0025                             | 157                  | 2.246374085                     | Hippo signaling pathway                   | RASSF1 CSNK1D CTNNA1 AMOT DLG2 DLG3 DVL3 BBC3 CRB2 BIRC3 SMAD2 SMAD3 SERPINE1 WNT4 PPP2R2B MOB1A CCND1 SAV1 MPP5 BMPR1A BMPR2 TGFB1 ACTG1 TP73 WNT3 WNT5A WNT2B WNT9B YWHAG FZD3 CCND2 BTRC MOB1B |
| 25                          | 0.0213                             | 128                  | 2.087362283                     | Lysosome                                  | AP3S2 CTSC AP1S3 HGSNAT CTSK CTSS DNASE2 GGA3 GALC GBA AP3M1 HYAL1 LIPA M6PR NEU1 ACP2 ACP5 LAPTM4B SORT1 PSAPL1 GNPTAB CD164 SCARB2 LITAF ENTPD4                                                 |
| 20                          | 0.0213                             | 93                   | 2.298342987                     | TGF-beta signaling pathway                | CDKN2B DCN FMOD GREM1 AMHR2 INHBB SMAD2 SMAD3 SMAD5 NEO1 MAPK1 RGMA TGIF2 SKP1 BMPR1A BMPR2 SP1 TGFB1 TNF ZFYVE16                                                                                 |
| 33                          | 0.0213                             | 181                  | 1.948512328                     | Axon guidance                             | SEMA4F EFNA5 EPHA3 EPHA4 EPHB2 NGEF KRAS NEO1 NFATC3 PAK1 PAK2 PAK3 PDPK1 WNT4 SSH1 ENAH MAPK1 DPYSL5 SEMA3G RGMA RASA1 ROBO2 CXCL12 SLIT3 BMPR2 SRC TRPC5 WNT5A FZD3 NTNG2 SEMA5A PLXNA4B LRIG2  |
| 12                          | 0.0213                             | 41                   | 3.127988748                     | Bladder cancer                            | RASSF1 DAPK3 E2F3 EGF DAPK2 KRAS MDM2 MAPK1 CCND1 SRC VEGFA RPS6KA5                                                                                                                               |
| 10                          | 0.0258                             | 33                   | 3.238574209                     | SNARE interactions in vesicular transport | VTI1B YKT6 STX1B STX1A STX5 VAMP4 STX16 STX11 SNAP29 GOSR1                                                                                                                                        |
| 19                          | 0.0258                             | 89                   | 2.281557336                     | GABAergic synapse                         | ADCY1 ABAT GABBR1 GABRA6 GABRB2 GABRB3 GABRG1 GABRG3 PIG59 GNG4 GNG11 GNGT1 KCNJ6 GABRQ TRAK2 SRC CACNA1S SLC38A1 HAP1                                                                            |
| 34                          | 0.0258                             | 202                  | 1.798851615                     | Proteoglycans in cancer                   | HPSE DCN ELK1 ERBB4 AKT2 ESR1 FGFR1 MRAS ANK3 IL12B ITPR2 KRAS SMAD2 MDM2 PAK1 PDPK1 PLAUR WNT4 MAPK1 MAPK13 CCND1 RDX SRC TGFB1 TLR4 ACTG1 TNF VEGFA EZR WNT3 WNT5A WNT2B WNT9B FZD3             |

<sup>a</sup> number of genes enriched in the pathway

<sup>b</sup> FDR is adjusted from the hypergeometric test. Fold Enrichment indicates how drastically genes of a certain pathway is overrepresented.

<sup>c</sup> Fold Enrichment is defined as the percentage of genes in the list belonging to a pathway, divided by the corresponding percentage in the background

**Supplementary Table S9.** Characteristics of the retrospective study used in the validation analysis.

|                         | MPM cases* | Controls** |
|-------------------------|------------|------------|
| <b>N (%)</b>            | 30 (60)    | 20 (40)    |
| <b>GENDER</b>           |            |            |
| M (%)                   | 22 (73)    | 20 (100)   |
| F (%)                   | 8 (27)     | 0 (0)      |
| <b>AGE</b><br>(mean±sd) | 72± 10     | 65±4       |

\*MPM enrolled at Azienda Ospedaliero-Universitaria Maggiore della Carità (Novara) ; \*\* Cancer-free individuals enrolled at the Occupational Medicine Department of the University of Genoa and at the Oncology Department of the Villa Scassi Hospital, Genova, Italy

## References

1. Pesch B, Gawrych K, Rabstein S, Weiss T, Casjens S, Rihs HP, et al. N-acetyltransferase 2 phenotype, occupation, and bladder cancer risk: results from the EPIC cohort. *Cancer Epidemiol Biomarkers Prev.* 2013 Nov;22(11):2055-65.
2. Livak KJ, Schmittgen TD. Analysis of relative gene expression data using real-time quantitative PCR and the 2(-Delta Delta C(T)) Method. *Methods.* 2001 Dec;25(4):402-8.
